# Supplementary material for: Benchmarking integration of single-cell differential expression
Source: Research Square preprint supplement (doi:10.21203/rs.3.rs-1723455/v1), 2022-06-13
Supplement: Supplementary file 1 [file TableS1.xlsx]

## Sheet: gene_rank_table_withlogFC
	scRNA-seq Epithelial cells data												TCGA bulk sample data
	ZW_edgeR_Cov				Raw_Wilcox				limmatrend_Cov				DESeq2				edgeR				limma				limmatrend
Rank (adjusted.pvalue)	Gene	Standard positive genes	adjusted.pvalue	logFC	Gene	Standard positive genes	adjusted.pvalue	logFC	Gene	Standard positive genes	adjusted.pvalue	logFC	Gene	Standard positive genes	adjusted.pvalue	logFC	Gene	Standard positive genes	adjusted.pvalue	logFC	Gene	Standard positive genes	adjusted.pvalue	logFC	Gene	Standard positive genes	adjusted.pvalue	logFC
1	TMSB10	Prognostic genes	0	-5.31971	RPS16		0	-3.89449	RPS16		0	-3.018	FAM83A		1.59608e-157	-4.90807	OTUD1		1.79244e-110	-4.97678	FABP4		1.98624e-138	-8.40573	OTUD1		3.43118e-86	-8.36912
2	ENO1	Known disease genes	0	-5.20864	RPS19		0	-3.11675	RPS19		0	-1.29768	PYCR1		1.33867e-153	-4.83574	EPAS1	Prognostic genes	1.41174e-104	-4.90413	STX11		1.59944e-124	-6.87623	RTKN2		2.16981e-85	-6.80844
3	TESC		0	-4.24398	RPL18A		0	-2.75793	RPL18A		0	-1.10589	OTUD1		1.44808e-127	-4.6863	RGCC		5.75719e-104	-4.7898	LGI3		6.83798e-120	-6.74068	PECAM1		3.42557e-82	-6.5363
4	CA2		0	-4.16447	GAPDH	Known disease genes / Prognostic genes	0	-2.73238	GAPDH	Known disease genes / Prognostic genes	0	-0.950325	ETV4		1.53513e-116	-4.17484	PECAM1		5.56473e-102	-4.23717	RTKN2		3.69619e-112	-6.51766	RGCC		5.34378e-79	-6.44184
5	RPS16		0	-3.05075	RPL36		0	-2.5953	RPL36		0	-0.899865	PECAM1		1.14369e-109	-4.1267	STX11		8.19717e-102	-4.22833	NECAB1		3.13063e-106	-6.10832	STX11		3.97175e-78	-5.99808
6	RPS19		0	-2.79836	RPL27		0	-2.4551	RPL27		0	-0.834226	TOP2A	Known disease genes	4.17414e-109	-4.08251	RTKN2		1.29323e-100	-4.1386	OTUD1		1.19611e-104	-5.7554	EPAS1	Prognostic genes	5.33692e-78	-5.71664
7	RPL18A		0	-2.72124	RPL35		0	-2.3533	RPL35		0	-0.798869	B3GNT3		1.10411e-108	-4.04405	EMP2		1.37766e-95	-4.10826	TNNC1		1.09276e-100	-5.48235	PYCR1		1.00563e-75	-5.27355
8	GAPDH	Known disease genes / Prognostic genes	0	-2.49409	RPS2		0	-2.24662	RPS2		0	-0.766728	EPAS1	Prognostic genes	4.28493e-108	-3.91748	EDNRB		1.3585e-93	-4.01894	EDNRB		1.62513e-98	-5.39546	FABP4		2.88175e-75	-5.19073
9	CBX3		0	-2.49094	RPS8		0	-2.19203	RPS8		0	-0.72218	RGCC		4.00247e-107	-3.90782	PTPN21		2.32879e-91	-3.97072	MCEMP1		3.62104e-98	-5.23553	EDNRB		8.09804e-74	-5.0051
10	SLPI		0	-2.2525	OCIAD2		0	-2.14947	OCIAD2		0	-0.679765	STX11		2.72934e-102	-3.46975	PRX	Prognostic genes	9.67514e-91	-3.54052	ADRB2		7.47031e-98	-5.04185	AGER		9.79718e-73	-4.95323
11	TXNDC17		0	-2.24019	RPL37		0	-2.09352	RPL37		0	-0.624987	TMEM184A		3.3687e-98	-3.46277	WWC2		1.0816e-88	-3.53643	HBA2		7.75008e-95	-4.95634	EMP2		1.11066e-72	-4.94825
12	RPL36		0	-2.16045	ALDOA	Known disease genes	0	-2.06228	ALDOA	Known disease genes	0	-0.609584	UBE2T		1.76054e-97	-3.43113	FMO2		3.98577e-81	-3.50116	PRX	Prognostic genes	3.54657e-93	-4.94339	CAV1		1.65805e-70	-4.93261
13	RPL27		0	-2.1449	RPL8		0	-1.98521	RPL8		0	-0.602181	MEX3A		4.16902e-97	-3.41321	FABP4		1.05871e-79	-3.47044	LRRC36		1.2146e-91	-4.86434	SPOCK2		4.61092e-69	-4.79957
14	LDHA	Known disease genes	0	-2.14147	CYB5A	Prognostic genes	0	-1.9797	RPL27A	Known disease genes	0	-0.537635	RTKN2		1.25525e-96	-3.31041	SPOCK2		2.76719e-79	-3.37402	PTPN21		3.36406e-86	-4.74624	PTPN21		4.71122e-69	-4.69666
15	RAC1	Prognostic genes	0	-2.13394	RPL27A	Known disease genes	0	-1.97931	RPL38		0	-0.500075	GOLM1	Known disease genes	3.40153e-95	-3.25404	AGER		5.25784e-79	-3.3114	ARHGEF26		3.08448e-80	-4.7141	WWC2		7.52e-69	-4.65281
16	RPL35		0	-2.11617	RPL38		0	-1.84738	PPP1R14B		0	-0.490895	CRABP2		3.68035e-95	-3.1914	ADRB2		1.64733e-78	-3.24274	ACADL		9.12096e-80	-4.69785	FAM83A		1.51062e-65	-4.59984
17	RPS2		0	-2.11276	PPP1R14B		0	-1.84044	RPLP2		0	-0.486777	EMP2		2.83945e-94	-3.15555	SMAD6		3.19669e-75	-3.2383	RGCC		1.03056e-79	-4.65642	PRX	Prognostic genes	3.89367e-65	-4.58673
18	RPS8		0	-2.09821	RPLP2		0	-1.68234	RPS23		0	-0.480631	TMPRSS4		6.75983e-94	-3.09088	CAV1		1.03583e-73	-3.18029	C14orf132		5.70831e-77	-4.6203	NECAB1		7.47039e-60	-4.55432
19	OCIAD2		0	-2.05416	RPS23		0	-1.58345	S100A13		0	-0.469632	PTPN21		1.13675e-92	-3.08137	PRKCE		5.09713e-72	-3.16458	CPB2		6.90936e-76	-4.46667	ARHGEF26		3.37776e-59	-4.4691
20	RPL37		0	-2.00273	S100A13		0	-1.54484	RPL12		0	-0.465546	UBE2C		2.70414e-90	-3.04067	CSRNP1		4.09418e-70	-3.15792	WWC2		1.50765e-75	-4.46504	PRKCE		1.15611e-58	-4.44152
21	CDKN2A		0	-1.99883	RPL12		0	-1.5397	RPL39		0	-0.434788	CTHRC1		1.06009e-89	-3.03786	ARHGEF26		1.05668e-69	-3.11685	PECAM1		1.25469e-74	-4.30989	SLC39A8		1.15611e-58	-4.29017
22	ALDOA	Known disease genes	0	-1.98664	RPL39		0	-1.51277	RPS18		0	-0.430977	WWC2		3.05812e-89	-3.01751	TNNC1		2.22935e-68	-3.08616	PRKCE		7.78522e-73	-4.26517	CAT		2.00413e-58	-4.25441
23	RPL8		0	-1.91962	RPS18		0	-1.50063	RPL36A	Known disease genes	0	-0.424574	EDNRB		3.77082e-88	-2.98659	SLC39A8		2.38137e-68	-3.07988	ARC		6.08718e-69	-4.22432	CLIC5		6.5005e-58	-4.13186
24	CYB5A	Prognostic genes	0	-1.91849	RPL36A	Known disease genes	0	-1.48793	TIMP1		0	-0.419831	PRX	Prognostic genes	8.32567e-85	-2.97933	MCEMP1		6.53367e-67	-3.07528	EPAS1	Prognostic genes	6.82205e-69	-4.11657	SRPK1		5.11498e-57	-4.04997
25	RPL27A	Known disease genes	0	-1.8895	RPS14		0	-1.48749	RPL23A		0	-0.405813	SRPK1		1.08579e-84	-2.9212	KANK2		1.44618e-66	-3.05249	PHACTR1		1.81724e-67	-4.05549	ADRB2		5.35069e-57	-3.95942
26	RPS21		0	-1.87433	TIMP1		0	-1.48327	ABCC3		0	-0.387385	ALDH18A1	Known disease genes	5.75718e-84	-2.8962	CAT		1.65069e-66	-3.01077	CD36		4.95287e-67	-4.0217	ALDH18A1	Known disease genes	7.75252e-57	-3.92449
27	RPL38		0	-1.82455	RPL23A		0	-1.47842	MARCKSL1		0	-0.374349	LGR4		9.89665e-83	-2.83693	SASH1		5.66387e-65	-2.94606	SMAD6		7.76309e-67	-3.93874	GOLM1	Known disease genes	1.69624e-56	-3.90396
28	PPP1R14B		0	-1.82051	ABCC3		0	-1.46968	MDK		0	-0.364591	EZH2		3.10238e-82	-2.82503	NECAB1		1.39689e-64	-2.93223	AGER		9.00002e-67	-3.92274	TOP2A	Known disease genes	2.62328e-56	-3.8913
29	UQCRH		0	-1.78341	SFTPC	Known disease genes	0	-1.44147	FABP5		0	-0.350933	SPAG4		1.40169e-81	-2.82386	SPTBN1		2.54428e-64	-2.91832	GKN2		1.0532e-66	-3.92229	LGI3		6.98159e-56	-3.85685
30	RPLP2		0	-1.77371	RPL28		0	-1.37048	TPPP3		0	-0.350892	CBLC		3.26513e-80	-2.79661	PDLIM2		3.23914e-64	-2.87532	CLIC5		1.11448e-66	-3.88055	C14orf132		7.83581e-56	-3.80585
31	RPS23		0	-1.76209	SCGB1A1		0	-1.35752	BST2		0	-0.342221	ATP10B		5.22649e-80	-2.77272	CLIC5		3.97684e-64	-2.87491	PDLIM2		2.8737e-64	-3.87597	FMO2		1.51771e-55	-3.80029
32	S100A16		0	-1.73164	MARCKSL1		0	-1.35324	WFDC2	Prognostic genes	0	-0.333304	SPTBN2		6.21515e-79	-2.66342	C14orf132		5.64984e-64	-2.86577	PALMD		2.34861e-63	-3.81628	KANK2		2.36447e-55	-3.78567
33	S100A13		0	-1.71651	MDK		0	-1.33953	IFI27		0	-0.331501	GJB2		1.32885e-78	-2.62413	GLIPR2		1.11381e-63	-2.73254	PIP5K1B		3.14707e-63	-3.79685	TMEM177		1.54623e-54	-3.68578
34	S100A6		0	-1.71456	FABP5		0	-1.3231	CEACAM6		0	-0.313002	SFXN1	Known disease genes	4.8898e-78	-2.61773	HBA2		2.15644e-63	-2.68494	EMP2		4.93928e-63	-3.72391	ETV4		2.07424e-54	-3.67215
35	RPL12		0	-1.70448	TPPP3		0	-1.31528	CDKN2A		0	-0.312584	SYT12		1.48854e-76	-2.60966	ANOS1		2.05461e-62	-2.68166	SPOCK2		5.19646e-63	-3.69352	MCEMP1		2.30679e-54	-3.66179
36	RPL39		0	-1.69717	BST2		0	-1.30821	UQCRH		0	-0.311174	PAICS		1.84684e-76	-2.57624	HBB		2.46707e-62	-2.67122	SESN1		1.15999e-62	-3.67962	PDLIM2		2.67476e-54	-3.64082
37	UBA52		0	-1.6832	WFDC2	Prognostic genes	0	-1.30071	LDHA	Known disease genes	0	-0.309173	HMGB3		3.61807e-76	-2.57096	HBEGF		2.48416e-62	-2.65662	FMO2		3.68186e-62	-3.6615	UBE2T		3.0894e-54	-3.57714
38	RPS18		0	-1.66968	HPGD		0	-1.29656	UBA52		0	-0.304028	EFNA4		8.69239e-76	-2.54933	TNS1		9.38943e-62	-2.65051	WIF1		2.53329e-61	-3.64801	TMEM184A		3.16249e-54	-3.50897
39	RPL36A	Known disease genes	0	-1.6692	GKN2		0	-1.28855	ENO1	Known disease genes	0	-0.296019	FUT2		1.53053e-75	-2.53151	ARHGAP31		1.01095e-61	-2.64838	HHIP		1.16215e-60	-3.56582	CD36		9.00978e-54	-3.48566
40	HBB		0	-1.66449	WIF1		0	-1.28133	S100A6		0	-0.292425	FERMT1		2.16371e-75	-2.51947	PYCR1		2.95767e-60	-2.6224	AFF3		2.27712e-60	-3.53474	TNNC1		2.30906e-53	-3.47783
41	GUK1		3.53878026699878e-317	-1.66072	CLDN18		0	-1.27461	TMSB10	Prognostic genes	0	-0.28893	FMO2		2.81683e-75	-2.5178	NDST1		7.5563e-60	-2.58032	GPM6B		1.71837e-59	-3.49115	GLIPR2		8.59158e-53	-3.45643
42	ANAPC11		6.33738583953635e-315	-1.65904	CRABP2		1.43786e-303	-1.26676	RAC1	Prognostic genes	0	-0.279284	SPP1	Prognostic genes	9.31069e-75	-2.50203	PNPLA6		1.56848e-59	-2.57155	PLA2G4F		5.31287e-59	-3.48187	SPTBN1		8.72539e-53	-3.44025
43	RPL24		5.60492853400968e-313	-1.6579	RPL24		1.26778e-299	-1.2555	SFTPC	Known disease genes	1.93673733169769e-319	-0.276294	GPT2		1.62891e-74	-2.49014	ARC		3.81054e-59	-2.56962	CAV1		7.34126e-59	-3.47705	SFXN1	Known disease genes	1.41521e-52	-3.43118
44	KDELR2		2.50853767334744e-311	-1.65521	RPL19		5.03612e-298	-1.24949	LY6E		1.5002384540599e-314	-0.266952	SPOCK2		3.01044e-74	-2.46307	STX12		3.92977e-59	-2.56317	VEPH1		8.18731e-59	-3.43977	EZH2		1.44344e-52	-3.42822
45	RPS14		1.09357e-306	-1.6432	TM4SF1		1.47042e-292	-1.24176	TM4SF1		1.52243154888271e-314	-0.263594	STX1A		5.33041e-74	-2.44809	LMCD1		1.03812e-58	-2.54343	HBEGF		1.27936e-58	-3.43971	CTHRC1		2.69851e-52	-3.42074
46	ZFP36L1		1.44653e-299	-1.63207	IFI27		1.15868e-291	-1.23568	S100A10		5.25954383607423e-313	-0.260793	PPAT		7.89592e-74	-2.44487	CASKIN2		2.71691e-58	-2.52217	ANOS1		2.93143e-58	-3.43218	B3GNT3		3.79351e-52	-3.34644
47	RPL37A		1.45709e-298	-1.63054	RPS15A	Prognostic genes	2.87282e-291	-1.21266	TXNDC17		1.83449884161052e-310	-0.254761	TMEM177		1.79066e-73	-2.44238	SERINC1		4.35199e-58	-2.51654	GLIPR2		4.80154e-58	-3.4083	PAICS		7.37449e-52	-3.33456
48	RPS7		2.80032e-298	-1.62299	PHLDA2		2.35844e-290	-1.19998	RPL24		0	-0.253075	ADRB2		1.91426e-73	-2.39605	MYADM		1.73294e-57	-2.51177	HBB		9.39394e-58	-3.4024	CSRNP1		9.29647e-52	-3.26296
49	PPIA		8.5749e-294	-1.62239	RPL13A	Known disease genes	5.5563e-284	-1.16671	ID2		1.2947e-306	-0.25096	GCNT3		4.91406e-73	-2.39309	THBD		2.47451e-57	-2.49325	GOLM1	Known disease genes	2.97031e-57	-3.36461	SASH1		1.32866e-51	-3.24135
50	TIMP1		1.17138e-291	-1.61958	CEACAM6		5.97621e-284	-1.1651	RPS15		9.79256e-306	-0.241909	PRKCE		1.1059e-72	-2.38628	KLF6		5.24782e-57	-2.49319	SEMA5A		3.65813e-57	-3.36208	ARHGAP31		2.40456e-51	-3.20325
51	RPS27	Prognostic genes	2.56645e-288	-1.60943	RPL10		3.53484e-283	-1.16225	PGC		5.58129e-301	-0.239851	SMAD6		1.45866e-72	-2.37993	PPP1R15A		2.04017e-56	-2.48079	GYPC		1.59286e-56	-3.32345	STX12		2.67553e-51	-3.20281
52	RPL23A		1.29708e-286	-1.59661	ADIRF		6.22867e-283	-1.14337	WIF1		2.82398e-299	-0.236922	FABP4		1.5355e-72	-2.37759	SESN1		7.51555e-56	-2.47179	SPRYD7		1.63741e-56	-3.30355	SERINC1		2.73076e-51	-3.1926
53	RPS27A		1.15443e-284	-1.59282	FABP4		2.46142e-282	-1.13815	ZFP36L1		3.59044e-299	-0.231811	MYO19		2.70515e-72	-2.37212	LTBP4		3.79279e-55	-2.45237	SASH1		4.07748e-56	-3.26773	HBA2		3.45916e-51	-3.18374
54	HLA-A		1.10495e-282	-1.59234	CDKN2A		6.35298e-281	-1.11332	RPL28		9.89253e-298	-0.228461	HS6ST2		6.13115e-72	-2.34686	CGNL1		2.0157e-54	-2.45142	PEBP4		5.13742e-56	-3.26535	SESN1		3.71913e-51	-3.14346
55	RPL23		9.71599e-280	-1.58368	UQCRH		2.03011e-278	-1.10999	RPL23		2.41299e-296	-0.227538	ZWINT		2.7418e-71	-2.34464	RCAN1		1.13378e-53	-2.4223	ARHGAP31		1.41482e-55	-3.25459	THBD		7.1574e-51	-3.14005
56	NME1		4.85673e-275	-1.5801	RPS15		5.53223e-278	-1.10666	RPS14		5.92951e-295	-0.226143	NUSAP1		3.36642e-70	-2.3202	SNRK		3.16017e-53	-2.4053	CAT		1.79647e-55	-3.24304	ANOS1		8.29093e-51	-3.11748
57	RPS15		8.56677e-275	-1.57682	LDHA	Known disease genes	7.97247e-276	-1.10592	RPS7		2.17814e-294	-0.225275	MDK		4.75032e-70	-2.31989	LDLR		8.60961e-53	-2.40074	SYNC		2.08605e-55	-3.22228	MYO19		4.07719e-50	-3.08415
58	RPL19		4.90801e-274	-1.57072	RPS7		2.48759e-271	-1.09192	RPL19		7.1441e-288	-0.222455	AGER		4.75032e-70	-2.31826	DENND3		1.04375e-52	-2.39878	PLA2G1B		6.3162e-55	-3.21577	SMAD6		5.35772e-50	-3.08333
59	ITGA3		8.83618e-272	-1.56937	PGC		1.60129e-267	-1.0818	ADIRF		2.37847e-286	-0.222355	RCC1		1.18189e-68	-2.31701	CD52		2.49082e-52	-2.37835	MS4A15		1.86424e-54	-3.20572	PPAT		1.21648e-49	-3.00648
60	MZT2B		6.6496e-271	-1.53858	RPL13		1.40454e-265	-1.07378	CD24		1.4691e-283	-0.22229	PPP1R14B		3.3796e-68	-2.30028	WFS1		3.61595e-52	-2.37067	HPS5		1.08039e-53	-3.20438	MEX3A		1.26897e-49	-2.99717
61	CTSD		7.5827e-271	-1.53538	ID3		1.42745e-265	-1.07369	RPL13A	Known disease genes	2.36157e-283	-0.221464	SLC2A1	Prognostic genes	4.12352e-68	-2.28009	PHACTR1		5.13428e-51	-2.37	KANK2		1.27181e-53	-3.17492	NDST1		1.56318e-49	-2.99488
62	S100A2		9.62984e-270	-1.53047	UBA52		3.62745e-264	-1.07336	RPS27A		1.00083e-282	-0.220725	TFAP2A		6.26612e-68	-2.27661	TGFBR2		9.32821e-51	-2.3512	THBD		2.1624e-53	-3.14782	HPS5		1.7712e-49	-2.97346
63	RPS10		1.72735e-269	-1.52652	ALDH1A1		1.12039e-263	-1.07248	CTSD		5.87138e-282	-0.220131	UNC5CL		8.74287e-68	-2.25916	GYPC		1.3961e-50	-2.34975	SYT15		4.86157e-53	-3.14045	LRRC36		3.34971e-49	-2.97142
64	RPL30		1.56072e-267	-1.50954	UPP1		2.72134e-258	-1.03695	RPL37A		1.66764e-281	-0.216068	RGS17		9.58969e-68	-2.25098	BMPR2		2.33732e-50	-2.33855	SLC39A8		6.01067e-53	-3.13515	HBB		3.69685e-49	-2.96514
65	RPL35A		2.08588e-267	-1.48315	TFPI2		2.01298e-257	-1.03411	RPS21		2.13508e-279	-0.215173	CNOT11		8.64533e-67	-2.24741	TACC1		2.39713e-50	-2.31392	CLDN18		9.95514e-53	-3.13496	HBEGF		8.94428e-49	-2.96016
66	P4HB		4.75994e-266	-1.4799	RPS27A		9.8358e-257	-1.02848	PPIA		1.1559e-278	-0.210085	RHBDL2		1.69236e-66	-2.24639	SRPK1		4.1881e-50	-2.30875	CSRNP1		2.06736e-52	-3.11664	TNS1		1.79034e-48	-2.95689
67	ABCC3		1.55071e-264	-1.47446	CES1		1.94245e-256	-1.02565	HLA-A		3.57664e-275	-0.209757	OCIAD2		6.20253e-66	-2.23869	PEAK1		5.66954e-50	-2.29746	ALDH18A1	Known disease genes	3.75078e-52	-3.11005	SNRK		2.13065e-48	-2.93848
68	SFTPC	Known disease genes	3.2932e-264	-1.45936	TXNDC17		4.28483e-256	-1.0247	CYB5A	Prognostic genes	5.54763e-275	-0.209336	SPINK1		2.75704e-65	-2.22642	SLC25A25		1.02924e-49	-2.29669	SNRK		5.3834e-52	-3.10037	SPTBN2		9.3161e-48	-2.93769
69	CAPS		1.1113e-259	-1.45399	RPL10A	Known disease genes / Prognostic genes	1.85149e-254	-1.02115	FTH1		1.06297e-272	-0.208189	CAV1		3.8707e-65	-2.22005	LAMP3		1.40017e-49	-2.28473	STX12		6.94237e-52	-3.07077	SPRYD7		9.38329e-48	-2.93487
70	COX6B1		3.77875e-259	-1.44876	ID1		3.20027e-253	-1.01345	CBX3		2.81129e-272	-0.207726	CSRNP1		4.16775e-65	-2.2078	HPS5		2.59546e-49	-2.28268	LMCD1		1.90832e-50	-3.01469	PHACTR1		1.35075e-47	-2.92511
71	RPS29		1.44487e-257	-1.44279	C15orf48	Prognostic genes	1.18649e-251	-1.00838	GKN2		1.50877e-271	-0.207017	KANK2		9.76071e-65	-2.19309	ALDH18A1	Known disease genes	4.35186e-49	-2.27798	SRPK1		5.16089e-50	-3.00079	CNOT11		1.72677e-47	-2.91629
72	ACTG1		4.14506e-257	-1.44182	SFN	Known disease genes	5.50358e-250	-1.00108	ID3		6.67541e-271	-0.206717	PLPP2		3.40922e-64	-2.18941	PLPP3		7.74664e-49	-2.26664	HSD17B6		5.7941e-50	-2.99297	RCC1		1.91448e-47	-2.89393
73	HBA2		3.89789e-256	-1.43905	LY6E		4.39432e-249	-0.990283	RPL35A		1.11664e-270	-0.204931	ARHGEF26		3.4559e-64	-2.1822	ADAMTS1		1.578e-48	-2.26428	AGTPBP1		1.59018e-49	-2.99293	DENND3		3.84492e-47	-2.89048
74	RPS25		1.52853e-254	-1.43291	RPL35A		5.55296e-247	-0.979449	CLDN18		4.24037e-269	-0.203145	NME1		2.87144e-63	-2.17678	SPRYD7		6.68621e-48	-2.25413	CGNL1		1.70052e-49	-2.98824	SPAG4		2.93506e-46	-2.88252
75	RPS15A	Prognostic genes	3.31564e-253	-1.43245	ID2		9.27087e-247	-0.97058	HPGD		4.85569e-268	-0.202473	SASH1		3.41865e-63	-2.1751	JDP2		1.44845e-47	-2.24823	SERINC1		2.77133e-49	-2.98703	LGR4		3.85014e-46	-2.86613
76	PDZK1IP1		7.72312e-249	-1.42969	RPS5		7.955e-244	-0.96745	RPL13		1.35611e-267	-0.201479	CAT		1.20819e-62	-2.16196	OLR1		2.43857e-47	-2.24359	RILPL2		5.85581e-49	-2.98651	ARC		4.60869e-46	-2.85046
77	KRT18		5.80888e-247	-1.42821	NUPR1		1.38777e-238	-0.952212	RPS15A	Prognostic genes	1.0667e-266	-0.201291	KDELR3		2.24205e-62	-2.14752	SYNPO		2.72817e-47	-2.22875	DENND3		8.90657e-49	-2.97825	LMCD1		4.86154e-46	-2.84367
78	SERINC2		1.04433e-244	-1.42187	RPL7A		3.05352e-238	-0.947195	RPS10		4.54421e-266	-0.198364	SLC39A8		2.48252e-62	-2.13223	MSR1		4.9115e-47	-2.22639	CFD		1.00354e-48	-2.97503	PLPP2		5.37494e-46	-2.8375
79	MET		3.6983e-244	-1.41458	CHI3L1		3.3344e-238	-0.939952	S100A16		4.33838e-265	-0.196651	SPTBN1		5.30573e-62	-2.12134	CAV2		8.96844e-47	-2.20935	RCAN1		1.06929e-48	-2.96987	EFNA4		5.85388e-46	-2.83414
80	KRT10		3.70468e-242	-1.4136	RPS3		1.7481e-236	-0.938488	RPL30		3.5078e-264	-0.192128	HELLS	Known disease genes	1.55568e-61	-2.11076	GOLM1	Known disease genes	1.62928e-46	-2.20679	SLC46A2		2.84086e-48	-2.94876	CGNL1		1.05556e-45	-2.83025
81	RPL28		6.04593e-240	-1.39681	RPS12		1.89607e-236	-0.922532	ALDH1A1		9.84392e-264	-0.192077	PAFAH1B3		4.25255e-61	-2.09918	PALMD		1.95492e-46	-2.19967	C1orf162		3.83185e-48	-2.94061	NLN		2.53987e-45	-2.81599
82	SCGB1A1		2.95161e-239	-1.39515	UBB	Prognostic genes	1.49496e-235	-0.914549	RPL7A		1.89633e-261	-0.191753	BCL2L15		1.25499e-60	-2.09533	C1orf162		2.79925e-46	-2.19433	SPTBN1		4.18632e-48	-2.92933	RCAN1		3.96266e-45	-2.80917
83	TPI1	Known disease genes / Prognostic genes	1.49072e-238	-1.38371	TMPRSS4		6.1617e-235	-0.910618	ANAPC11		2.87163e-261	-0.18823	NLN		2.59643e-60	-2.09014	SFXN1	Known disease genes	3.18077e-46	-2.19294	CBX7	Prognostic genes	5.021e-48	-2.8984	KLF6		4.97985e-45	-2.80088
84	BTF3		1.31079e-237	-1.38306	RPL11	Prognostic genes	9.55241e-232	-0.906917	RPS12		5.35232e-261	-0.188208	CA9		6.13745e-60	-2.08923	CBX7	Prognostic genes	4.27141e-46	-2.18196	PAICS		5.021e-48	-2.88178	FUT2		5.31648e-45	-2.79638
85	RHOC		4.43759e-237	-1.37513	S100A16		2.19876e-231	-0.903515	RPL10A	Known disease genes / Prognostic genes	5.49268e-260	-0.186505	PDLIM2		6.78988e-60	-2.08868	ETV4		4.28974e-46	-2.17796	NDST1		1.79345e-47	-2.87893	GYPC		5.88731e-45	-2.78451
86	RPL22		3.59645e-235	-1.36701	RPS27	Prognostic genes	3.66861e-229	-0.902884	RPS27	Prognostic genes	3.91306e-259	-0.185417	MCM4		6.90267e-60	-2.08579	CD36		1.90931e-45	-2.17702	PEAK1		1.92297e-47	-2.86852	LAMP3		6.02225e-45	-2.78136
87	APLP2		1.71567e-231	-1.36635	ISG15		5.49204e-226	-0.89633	ACTG1		1.58016e-258	-0.184781	TNNC1		1.31977e-59	-2.08371	RILPL2		1.96915e-45	-2.15303	FABP5		2.27563e-47	-2.85577	SYT15		7.46171e-45	-2.77928
88	RPL7A		8.89179e-231	-1.3656	ENO1	Known disease genes	9.42095e-225	-0.896134	KRT18		1.47644e-254	-0.184611	PDIA4		1.83325e-59	-2.07553	FERMT2		2.62744e-45	-2.14702	LGALSL		9.97583e-47	-2.8505	PEAK1		9.04582e-45	-2.77691
89	MIF		9.19459e-231	-1.3612	PEBP4		1.19581e-222	-0.886547	RPS29		1.46552e-253	-0.182766	MMP1		4.96718e-59	-2.07384	TMEM177		4.41322e-45	-2.14673	DAPK2		1.12117e-46	-2.85026	TACC1		9.04582e-45	-2.77301
90	PHLDA2		1.15857e-230	-1.35996	RPL23		1.2925e-222	-0.882374	GUK1		3.97367e-253	-0.179472	TNFRSF21		6.67601e-59	-2.07084	RNF144B		4.84454e-45	-2.14313	SLC1A1		1.27948e-46	-2.83377	CAV2		1.2506e-44	-2.76796
91	TM4SF1		1.16742e-229	-1.35752	ZFP36L1		3.21354e-219	-0.88145	RPS25		1.01336e-252	-0.179365	MCEMP1		7.10638e-59	-2.04675	METTL7A		1.73272e-44	-2.1393	CASKIN2		1.31229e-45	-2.82188	TGFBR2		1.92363e-44	-2.75978
92	EEF1B2		1.01166e-227	-1.35413	CLDN10		7.17663e-218	-0.876258	RPS5		1.51207e-248	-0.178245	GLIPR2		9.20525e-59	-2.02925	SEMA5A		2.49564e-44	-2.13429	GATA6		1.4076e-45	-2.81518	GPX3		2.32283e-44	-2.6922
93	SFN	Known disease genes	1.05094e-227	-1.35238	RPS13		1.43254e-215	-0.875918	PEBP4		1.61754e-247	-0.178051	MSTO1		1.03232e-58	-2.02637	TMEM184A		3.52006e-44	-2.12709	ESAM		2.85405e-45	-2.79929	PNPLA6		3.81676e-44	-2.67775
94	MARCKSL1		1.25518e-227	-1.35037	COL1A1		3.5412e-215	-0.874463	MZT2B		1.53915e-245	-0.175526	TK1	Known disease genes / Prognostic genes	1.03348e-58	-2.02323	QKI		4.52861e-44	-2.10719	OLR1		3.25309e-45	-2.79496	SEMA5A		4.74893e-44	-2.67703
95	LSR		1.77693e-227	-1.34461	TFPI		1.36586e-213	-0.873674	COX6B1		2.04336e-244	-0.174353	KAT2A		1.76457e-58	-2.02145	ENG		5.00036e-44	-2.10497	PDZD2		4.01835e-45	-2.79294	PLPP3		5.13842e-44	-2.66633
96	FTH1		4.56412e-227	-1.34304	RHOC		6.67702e-212	-0.853267	RPS3		4.73071e-243	-0.174007	SLC25A10		1.83715e-58	-2.02065	KIF1C		1.01929e-43	-2.09845	RASGRF1		5.7177e-45	-2.78589	PALMD		1.40586e-43	-2.65484
97	RPS13		2.04874e-226	-1.34134	LRRC36		3.37703e-210	-0.844622	RPL10		4.81592e-243	-0.173962	C14orf132		2.0427e-58	-2.01554	AGTPBP1		1.04446e-43	-2.09373	CD52		9.10316e-45	-2.78322	PPP1R15A		1.40681e-43	-2.64021
98	SDC1		3.15089e-225	-1.33762	TNC		1.57797e-209	-0.837387	KDELR2		1.96206e-242	-0.170218	NECAB1		4.3806e-58	-2.01486	UBE2T		1.15063e-43	-2.09365	ANKRD29		1.24869e-44	-2.77893	WFS1		1.56455e-43	-2.63761
99	HMGA1		4.02052e-225	-1.33749	PLAT		2.94768e-209	-0.832167	RPL11	Prognostic genes	2.71332e-241	-0.16963	NDST1		5.73191e-58	-2.00608	TOP2A	Known disease genes	1.24618e-43	-2.08702	PID1		1.29862e-44	-2.77748	ESAM		1.62886e-43	-2.63378
100	NENF		7.32389e-225	-1.33493	ASCC2		4.47215e-209	-0.829622	SOX4		9.69843e-241	-0.166803	STX12		6.53673e-58	-2.00094	PAICS		1.6486e-43	-2.07959	RNF144B		1.53475e-44	-2.774	KNOP1		2.07802e-43	-2.63254
101	SNRPE		8.7612e-225	-1.33249	RPL37A		5.68289e-208	-0.824322	PHLDA2		4.09554e-238	-0.166033	ARHGAP31		1.02664e-57	-2.00009	ESAM		1.70562e-43	-2.06841	PCDH9		2.57123e-44	-2.71753	UBE2C		2.07802e-43	-2.62916
102	C19orf53		1.65022e-223	-1.32041	FTH1		2.13924e-206	-0.817545	RPS4X		1.32594e-237	-0.16515	KNOP1		1.26513e-57	-1.98631	AMOTL1		2.0336e-43	-2.06595	NHSL1		4.20681e-44	-2.69338	BMPR2		2.43059e-43	-2.62867
103	ID2		2.73993e-222	-1.31336	MS4A8		7.90775e-206	-0.817154	P4HB		8.58701e-236	-0.16303	PODXL2		1.86444e-57	-1.95825	LGALSL		4.00077e-43	-2.06035	DOCK4		5.38046e-44	-2.69102	STX1A		3.10977e-43	-2.60338
104	UPP1		1.54598e-221	-1.31191	C20orf85		3.64763e-204	-0.806004	CRABP2		8.77685e-236	-0.162292	LMCD1		1.9339e-57	-1.95791	ST6GALNAC6		4.23825e-43	-2.06001	PLPP3		6.51367e-44	-2.68814	RILPL2		3.52901e-43	-2.60006
105	RPL11	Prognostic genes	1.08488e-220	-1.30916	RPS25		5.14014e-203	-0.805712	BTF3		3.79827e-234	-0.161801	C1orf131		2.04022e-57	-1.95105	CNOT11		4.54586e-43	-2.03254	PNPLA6		8.01426e-44	-2.67781	MSTO1		8.38691e-43	-2.58927
106	RPL10A	Known disease genes / Prognostic genes	3.22143e-217	-1.30851	IFI6		3.13772e-202	-0.801058	UPP1		2.85955e-233	-0.161252	DNAJC12		2.44571e-57	-1.94889	MYO19		5.44666e-43	-2.01475	PYCR1		9.42194e-44	-2.67513	FAM136A		8.78665e-43	-2.5847
107	NDUFS5		4.41681e-217	-1.30363	ANAPC11		1.11338e-200	-0.798377	COL1A1		3.64735e-233	-0.161205	PLEK2		2.53599e-57	-1.93008	KIAA0040		1.03891e-42	-2.00532	WFS1		1.32612e-43	-2.6694	LTBP4		1.22621e-42	-2.57899
108	FAM3C		2.28121e-215	-1.30346	RPS21		1.28475e-200	-0.78186	RPS13		1.35101e-228	-0.160159	TNS1		3.79255e-57	-1.92607	KLF9		1.17402e-42	-2.00017	FIG4		1.77946e-43	-2.65292	FERMT1		1.36051e-42	-2.57612
109	LY6E		3.85834e-214	-1.30268	CEACAM5		6.28415e-198	-0.78011	C15orf48	Prognostic genes	1.4984e-226	-0.159013	SOX4		4.87034e-57	-1.92221	HYAL2		1.24167e-42	-1.99766	CRTAC1		1.90832e-43	-2.63688	QKI		1.94434e-42	-2.57333
110	NDRG1		4.33663e-212	-1.29557	BTF3		1.99779e-196	-0.777301	TPI1	Known disease genes / Prognostic genes	1.51088e-226	-0.155119	FAM136A		6.87672e-57	-1.89725	MARCO		1.71681e-42	-1.97214	CNOT11		3.68883e-43	-2.63455	ZWINT		2.02094e-42	-2.5608
111	PLS3		1.13111e-211	-1.29467	RPS29		2.41604e-196	-0.776798	SERPINA1		1.79524e-226	-0.151942	SERINC1		1.47978e-56	-1.88667	FIG4		3.00113e-42	-1.96985	OSBPL11		3.68883e-43	-2.62483	NUSAP1		2.03442e-42	-2.55992
112	TXN		7.15926e-211	-1.2925	S100A6		1.61191e-195	-0.765467	RPL22		6.39596e-225	-0.149992	ECT2		2.74743e-56	-1.88532	CD83		3.50775e-42	-1.96793	RASGEF1B		4.32176e-43	-2.61513	AGTPBP1		3.37225e-42	-2.55563
113	PRDX2		1.91793e-210	-1.2924	AREG		2.01291e-195	-0.762247	EEF1B2		8.47717e-225	-0.148526	ANOS1		3.15214e-56	-1.88197	N4BP1		3.79449e-42	-1.95536	TNS1		4.3618e-43	-2.6129	GPT2		3.64832e-42	-2.53944
114	LGALS3BP		4.2906e-210	-1.28256	TESC		1.37748e-193	-0.761817	LAMP3		6.78588e-224	-0.146425	GALNT14		3.98731e-56	-1.87642	ACADL		4.74606e-42	-1.95284	ACOXL		7.54135e-43	-2.58646	NME1		5.54586e-42	-2.53602
115	TUBB		5.18931e-210	-1.27137	CD52		3.29194e-187	-0.757655	RHOC		2.28911e-223	-0.145052	PNPLA6		4.06133e-56	-1.87537	PAPSS1		4.77682e-42	-1.94661	MTMR10		1.34381e-42	-2.57876	METTL7A		1.12081e-41	-2.52517
116	RPL10		1.60065e-208	-1.27122	DUSP6		7.31774e-187	-0.754977	RPL32		2.46612e-221	-0.143725	PROM2		4.50387e-56	-1.86229	TOM1L2		4.92998e-42	-1.93678	DIXDC1		1.44639e-42	-2.57445	CBX7	Prognostic genes	1.12188e-41	-2.50589
117	FAU		4.67824e-208	-1.26657	NME1		1.6214e-185	-0.754972	SERINC2		5.63914e-219	-0.143033	HBEGF		5.64947e-56	-1.85842	FAM83A		7.48932e-42	-1.92604	AMOTL1		2.68797e-42	-2.56971	C1orf131		1.16749e-41	-2.49705
118	RPS3		2.82272e-207	-1.25704	CTSD		2.01312e-185	-0.752623	RPL31		8.32229e-219	-0.142317	HBA2		1.03139e-55	-1.85595	PPAT		7.48932e-42	-1.92565	TACC1		2.92233e-42	-2.56915	PPP1R14B		1.53087e-41	-2.48857
119	SUMO2		4.59416e-207	-1.25631	RPL18		1.39661e-184	-0.747171	CSTB		4.62889e-218	-0.141613	DONSON		1.14534e-55	-1.85215	OSBPL11		7.64198e-42	-1.92389	PPP1R15A		4.18232e-42	-2.55939	CASKIN2		1.6213e-41	-2.47501
120	TNFRSF21		1.30535e-205	-1.24548	S100A2		3.75667e-184	-0.735961	S100A11		1.47535e-216	-0.140801	ATIC		1.78905e-55	-1.85086	EZH2		7.93726e-42	-1.91574	PDIA4		4.94589e-42	-2.52625	TMPRSS4		1.64593e-41	-2.47328
121	TMEM147		2.79925e-205	-1.24294	NDRG1		6.20909e-184	-0.732302	ID1		6.20113e-215	-0.140651	HBB		1.79257e-55	-1.85072	LGI3		1.03239e-41	-1.91147	DUOX1		5.97127e-42	-2.51286	ACADL		1.84199e-41	-2.43726
122	COX7C		1.0498e-204	-1.22855	EEF1B2		6.5648e-184	-0.732281	RPS17		1.47308e-214	-0.140551	ARHGEF16		2.13505e-55	-1.83004	RCC1		1.83861e-41	-1.9063	BMPR2		6.16726e-42	-2.50921	CLDN18		3.20671e-41	-2.43653
123	PRDX5		6.16747e-204	-1.22376	SERINC2		5.02332e-183	-0.724041	MIF		6.8336e-214	-0.14017	SLC35F2		4.61131e-55	-1.82583	EFNA4		2.76953e-41	-1.90185	KLF6		7.7091e-42	-2.49355	E2F3		3.68156e-41	-2.42695
124	HINT1		9.59653e-204	-1.22368	RPS4X		1.06309e-181	-0.723651	C19orf53		8.95371e-213	-0.140032	KCNN4		4.79824e-55	-1.82344	INPP5K		3.28371e-41	-1.89967	GAB1		8.99247e-42	-2.49232	SPP1	Prognostic genes	7.77321e-41	-2.42625
125	TMEM167A		4.60847e-202	-1.22281	C1orf194		4.87154e-181	-0.721772	RPS3A		2.18283e-212	-0.140031	EPCAM		4.87804e-55	-1.81906	CTNNAL1		4.36881e-41	-1.89796	GPC3		1.01122e-41	-2.49	OCIAD2		9.29174e-41	-2.4217
126	MT-CO2		2.99764e-201	-1.22274	SRD5A3	Prognostic genes	1.12067e-180	-0.721373	SFN	Known disease genes	3.92051e-210	-0.140015	CHEK1	Prognostic genes	5.04946e-55	-1.81281	KLF4		4.57976e-41	-1.89005	FERMT2		1.20735e-41	-2.48671	SYNPO		9.85682e-41	-2.4171
127	ST14		7.98757e-201	-1.2203	TMSB10	Prognostic genes	1.35185e-180	-0.72076	TMSB4X		2.99859e-209	-0.139369	CLIC5		5.83645e-55	-1.81152	ACP5		4.81186e-41	-1.88555	CAV2		1.27936e-41	-2.46046	CD52		1.79234e-40	-2.41662
128	CHCHD2		1.92055e-200	-1.21959	EREG	Prognostic genes	2.61111e-180	-0.719361	KRT10		2.49625e-208	-0.138698	CASKIN2		1.72589e-54	-1.81144	KLF13		7.13013e-41	-1.88172	KLF4		1.45363e-41	-2.45982	SIX4		2.65672e-40	-2.41519
129	PON2		2.13666e-200	-1.21815	MZT2B		5.7928e-180	-0.716137	RPL34		3.67631e-208	-0.138041	SESN1		2.39267e-54	-1.80821	SYNC		8.644e-41	-1.88087	HSPB8		1.67347e-41	-2.43492	SYNC		4.43841e-40	-2.39405
130	RPL13		1.15632e-199	-1.21134	CDC42EP1		1.11307e-179	-0.714385	GPX1		8.78219e-206	-0.137693	PITX1		4.71741e-54	-1.80666	B3GNT3		9.99811e-41	-1.87651	TMEM139		1.73087e-41	-2.42158	HMGB3		5.00518e-40	-2.3915
131	UQCC2		1.04028e-197	-1.20949	CD36		5.36343e-179	-0.710265	NME1		2.99098e-204	-0.135593	SNRK		5.19257e-54	-1.80415	RBMS2		1.00819e-40	-1.87266	CTNNAL1		2.93279e-41	-2.4195	FERMT2		5.80878e-40	-2.38763
132	SUB1		1.54167e-197	-1.20847	RPS6		8.55198e-178	-0.710064	RPS11		6.21834e-202	-0.13491	ARC		6.75184e-54	-1.80152	SPTBN2		1.80587e-40	-1.86844	PHACTR2		3.01321e-41	-2.40704	OSBPL11		8.25931e-40	-2.38414
133	EEF1D		1.9471e-196	-1.19911	SLC16A3		6.09833e-177	-0.708509	PRDX2		2.51166e-201	-0.13476	MARCKSL1		9.40147e-54	-1.80128	GNAQ		1.94772e-40	-1.86219	ARHGAP24		3.92471e-41	-2.40611	KIF1C		8.8526e-40	-2.37895
134	CSTB		5.87031e-196	-1.19883	LPP		8.21477e-177	-0.699788	MZT2A		2.09167e-200	-0.134636	ABCC3		1.30277e-53	-1.79708	GPX3		2.94368e-40	-1.86217	TGFBR2		5.02842e-41	-2.40471	RNF144B		1.01448e-39	-2.37473
135	PAG1		4.35867e-195	-1.19849	CHST9		1.18543e-176	-0.695265	PKM	Prognostic genes	5.37305e-200	-0.133052	DNAH14		1.5018e-53	-1.78588	LGR4		3.1089e-40	-1.86119	QKI		5.25759e-41	-2.39804	FIG4		1.13286e-39	-2.37385
136	RPL13A	Known disease genes	4.35867e-195	-1.1971	METTL7A		2.18118e-176	-0.694604	EEF1D		2.89791e-199	-0.132569	E2F3		1.76926e-53	-1.78462	HLA-E		6.23873e-40	-1.86071	ADAMTS1		5.53708e-41	-2.39302	ST6GALNAC6		1.20608e-39	-2.3725
137	RPL31		1.41735e-194	-1.19683	SOX4		7.67509e-176	-0.693343	SNRPE		1.052e-198	-0.132105	GGCT		2.23737e-53	-1.77555	RMDN3		7.43768e-40	-1.85843	C20orf194		5.64496e-41	-2.39239	PAPSS1		1.7605e-39	-2.36558
138	S100A10		4.43874e-194	-1.19658	P4HB		3.41448e-175	-0.693326	NDUFS5		1.93062e-198	-0.131143	MYADM		3.56269e-53	-1.77418	PPM1D		7.77134e-40	-1.85164	ST6GALNAC6		2.69397e-40	-2.39217	DONSON		1.93241e-39	-2.36126
139	RPL32		9.04894e-194	-1.1953	RPLP0		7.28481e-175	-0.69137	CHCHD2		2.01484e-198	-0.130905	C11orf80		3.8139e-53	-1.77317	DLC1		8.88845e-40	-1.85128	INPP5K		2.83419e-40	-2.3869	MYADM		2.54346e-39	-2.35932
140	CAT		1.60787e-193	-1.19457	TM4SF4		1.44223e-173	-0.680137	RPLP0		5.60697e-197	-0.130529	ERO1A		5.53356e-53	-1.76679	ZNF106		1.03321e-39	-1.8487	METTL7A		3.02362e-40	-2.38668	KAT2A		2.90804e-39	-2.35472
141	NDUFB4		3.34931e-193	-1.18938	RPS10		2.20185e-173	-0.674159	ARPC1B		4.22973e-195	-0.129808	KLF6		5.53911e-53	-1.76645	LATS2	Known disease genes	2.93821e-39	-1.84634	LAMP3		3.93876e-40	-2.3853	LDLR		3.65893e-39	-2.35245
142	TTYH3		4.36896e-193	-1.18579	RPL34		7.4586e-173	-0.673647	RPL18		1.24961e-194	-0.129763	FANCA		1.00966e-52	-1.76479	MYL9		3.34283e-39	-1.83381	HACD4		5.22417e-40	-2.37644	AMOTL1		4.15404e-39	-2.34523
143	PKM	Prognostic genes	8.95527e-193	-1.18365	SLPI		1.49612e-172	-0.666467	SRD5A3	Prognostic genes	2.18981e-194	-0.129627	DBNDD1		3.23748e-52	-1.76201	SFTPC	Known disease genes	4.0433e-39	-1.82954	ARL13B		6.11728e-40	-2.37146	GNAQ		5.48985e-39	-2.32696
144	CLPTM1L	Known disease genes / Prognostic genes	2.32146e-190	-1.17721	PRDX2		5.0017e-171	-0.666351	SCGB1A1		2.64405e-194	-0.128673	NARF		4.63085e-52	-1.75819	SPAG4		5.59287e-39	-1.82049	PAPSS1		6.85071e-40	-2.36714	ENG		5.89981e-39	-2.32394
145	SYNGR2		7.23241e-190	-1.17312	RPL7		3.479e-170	-0.66521	RPS6		5.8735e-194	-0.128198	PPP1R15A		5.30875e-52	-1.75685	KNOP1		5.89909e-39	-1.81735	JDP2		1.09355e-39	-2.36016	TFAP2A		8.02447e-39	-2.30941
146	RPS5		7.38238e-190	-1.17147	MZT2A		1.30541e-169	-0.658166	NPM1	Known disease genes	4.34382e-193	-0.127627	BARX2		1.04485e-51	-1.75625	CFD		5.89909e-39	-1.81394	GMFG		1.10686e-39	-2.35412	ATIC		8.89997e-39	-2.30556
147	COL1A1		9.83834e-190	-1.17031	LAMP3		2.05579e-169	-0.65775	KRT19		1.89266e-192	-0.12751	MUC3A		1.42969e-51	-1.75583	C1orf131		1.10966e-38	-1.81308	SOX4		1.1604e-39	-2.35212	OLR1		1.06493e-38	-2.30547
148	NDUFS6		1.51377e-189	-1.17022	RPL32		6.94729e-169	-0.656565	EIF3K		8.53574e-192	-0.12713	XPR1		1.42969e-51	-1.74439	ALOX5	Known disease genes	1.16462e-38	-1.80434	ICAM2		1.89491e-39	-2.35074	ATP10B		1.30601e-38	-2.30479
149	EIF3K		3.66888e-189	-1.16724	SERPINA1		4.61039e-168	-0.652052	TXN		2.42907e-190	-0.126978	CP		1.80134e-51	-1.7432	NLN		1.50413e-38	-1.80372	ID4		2.13748e-39	-2.34754	MSR1		1.5558e-38	-2.30346
150	SCGB3A1		1.38788e-188	-1.16462	C9orf24		4.66764e-168	-0.652009	NDRG1		1.14784e-189	-0.125252	CEACAM5		6.85463e-51	-1.7421	AHNAK		2.62878e-38	-1.80121	SFXN1	Known disease genes	2.47711e-39	-2.32794	C1orf162		2.05425e-38	-2.29656
151	ARPC1B		1.69108e-188	-1.15768	RPS17		5.53188e-168	-0.646403	HSPB1	Known disease genes	1.51288e-189	-0.123789	P3H4		7.53745e-51	-1.73149	PPP1R14B		3.07288e-38	-1.79896	LTBP4		2.92412e-39	-2.319	N4BP1		2.36826e-38	-2.29179
152	HSPB1	Known disease genes	3.56413e-188	-1.15615	FAM216B		1.46264e-165	-0.643621	TUBB		2.5123e-189	-0.12289	PTGES		8.69349e-51	-1.73067	NCF2		3.10155e-38	-1.79478	LATS2	Known disease genes	4.25752e-39	-2.31768	HELLS	Known disease genes	2.65586e-38	-2.28863
153	RPS11		2.86953e-187	-1.15119	RPL30		2.39115e-164	-0.643208	NENF		5.82986e-189	-0.122484	ECE2		1.15469e-50	-1.72817	LRRC36		3.25647e-38	-1.78618	TOM1L2		9.76251e-39	-2.31423	CTNNAL1		3.01243e-38	-2.28436
154	PAFAH1B3		7.64412e-187	-1.14923	APOC1		5.51901e-164	-0.636341	TFPI		1.58524e-188	-0.122262	SERINC2		1.34969e-50	-1.71805	RASGEF1B		3.30472e-38	-1.77551	GPX3		1.12247e-38	-2.30868	PDIA4		4.50474e-38	-2.28356
155	S100A11		2.32422e-186	-1.14773	ADGRF1		1.10025e-163	-0.635637	RPL29		5.7554e-188	-0.122011	THBD		1.50512e-50	-1.71412	C20orf194		3.59415e-38	-1.77511	CFL2		1.1892e-38	-2.3025	LGALSL		4.80124e-38	-2.28216
156	SSR3		6.04353e-185	-1.14564	C1QB		1.11606e-162	-0.632495	FAU		2.17598e-187	-0.121966	RCAN1		1.67857e-50	-1.71402	HSPB8		3.73348e-38	-1.77254	ZNF385B		1.29638e-38	-2.29251	GPM6B		5.06797e-38	-2.28085
157	MT-ND1		1.68651e-184	-1.14041	MORN5		5.07475e-162	-0.632241	PLAT		1.07163e-185	-0.121439	GALNT7		1.70448e-50	-1.71291	SNX1	Prognostic genes	5.10241e-38	-1.76621	N4BP1		1.39113e-38	-2.29089	C11orf80		5.21609e-38	-2.27898
158	DPP4		2.66504e-184	-1.13939	CBX3		1.10256e-161	-0.630847	RPS24		2.7398e-185	-0.120886	F12		1.77572e-50	-1.71057	DPYSL2		6.15739e-38	-1.76027	SEC22C		1.70938e-38	-2.28877	SOX4		5.45807e-38	-2.27886
159	TMSB4X		3.25652e-184	-1.13803	FMO2		1.26583e-160	-0.626397	FABP4		3.64629e-185	-0.120838	LTBP4		1.83193e-50	-1.70677	DOCK4		6.51387e-38	-1.75923	MSR1		1.75817e-38	-2.28677	RBMS2		5.60583e-38	-2.26179
160	CEACAM6		4.12443e-184	-1.13616	SNTN		3.10467e-158	-0.623474	AREG		2.79733e-184	-0.11998	PTTG1		2.41279e-50	-1.70059	SEC22C		6.7588e-38	-1.75884	GNAQ		1.79025e-38	-2.28284	DOCK4		6.07295e-38	-2.25111
161	OST4		5.02318e-184	-1.13526	TEKT1		1.83924e-156	-0.620431	C9orf24		2.17066e-183	-0.119904	WFDC3		2.78042e-50	-1.70014	FAM136A		7.4797e-38	-1.75869	MARCO		2.07586e-38	-2.28212	GAS6		7.1136e-38	-2.24943
162	EMP2		1.82174e-183	-1.13392	SEZ6L2		6.27644e-156	-0.617932	SDC1		3.0909e-183	-0.1199	BMPR2		2.8024e-50	-1.69483	SYT15		1.53676e-37	-1.7507	DUOXA1		2.57811e-38	-2.28203	SNX1	Prognostic genes	7.77063e-38	-2.24756
163	IFI27		2.44728e-183	-1.13328	ERO1A		1.62995e-155	-0.610697	PTMA		4.46448e-183	-0.119841	ARHGAP40		3.46384e-50	-1.69255	MEX3A		1.54577e-37	-1.74693	RBMS2		4.01624e-38	-2.27961	ADAMTS1		8.25312e-38	-2.24712
164	C15orf48	Prognostic genes	4.56384e-183	-1.12134	TPI1	Known disease genes / Prognostic genes	1.36151e-154	-0.61031	RPL7		1.7666e-181	-0.119495	FLAD1		1.62501e-49	-1.68704	PLA2G4F		2.68078e-37	-1.74266	SHC3		4.54913e-38	-2.27507	PIP5K1B		1.09546e-37	-2.24266
165	RPL34		1.19294e-182	-1.12013	HHIP		2.36892e-154	-0.609419	C20orf85		6.19116e-180	-0.117431	SYNJ2		1.77484e-49	-1.67957	GAS6		3.06318e-37	-1.74244	SYNPO		4.73494e-38	-2.27338	DNAH14		1.46209e-37	-2.22529
166	MORN2		3.79288e-182	-1.11819	CKLF		2.7292e-154	-0.602736	PABPC1		1.09088e-179	-0.11678	GPX2		1.85589e-49	-1.67955	CALCOCO1		3.66079e-37	-1.74097	TSPAN7		4.899e-38	-2.27262	INPP5K		1.61958e-37	-2.22329
167	MZT2A		3.89558e-182	-1.11612	LGALS9		4.364e-154	-0.600236	MS4A8		8.00192e-179	-0.11612	IL37		2.02314e-49	-1.67741	ARL13B		5.36616e-37	-1.73416	PPM1D		6.07822e-38	-2.26757	TOM1L2		1.85764e-37	-2.21989
168	RPS12		1.51648e-181	-1.1054	C1QA		4.68158e-154	-0.598139	KRT7		8.98685e-179	-0.116058	DENND3		2.9137e-49	-1.67314	ATIC		6.77904e-37	-1.73356	KIF1C		9.22324e-38	-2.2568	ZNF106		2.31602e-37	-2.21946
169	CETN2	Prognostic genes	9.61562e-181	-1.10492	ROPN1L	Prognostic genes	6.73384e-154	-0.590543	LGALS3BP		3.17368e-178	-0.115355	KPNA2	Known disease genes / Prognostic genes	3.37401e-49	-1.67202	MSTO1		7.15041e-37	-1.73216	RMDN3		9.38125e-38	-2.2512	KDELR3		2.98285e-37	-2.2176
170	RPS17		1.36759e-180	-1.10301	DNAAF1		8.97517e-154	-0.588751	FXYD5		3.93004e-178	-0.115108	RALGPS2		6.61198e-49	-1.67035	MAP3K3		8.85803e-37	-1.7298	PRKCH		1.42435e-37	-2.24406	MYL9		3.05506e-37	-2.2164
171	LAD1		2.04614e-178	-1.10227	FAU		1.49081e-153	-0.586651	METTL7A		7.32069e-178	-0.114724	CGNL1		1.1179e-48	-1.66825	CTHRC1		9.09723e-37	-1.72752	AARD		1.59232e-37	-2.2362	DUOX1		3.13709e-37	-2.21216
172	LSM2		1.08269e-177	-1.10077	RAB34		1.59475e-153	-0.585008	SLC16A3		1.73201e-177	-0.113746	PEAK1		1.1478e-48	-1.66568	VAMP2		9.58403e-37	-1.72232	SNX1	Prognostic genes	2.27999e-37	-2.23598	MCM4		3.61012e-37	-2.20718
173	NPM1	Known disease genes	1.45497e-177	-1.10005	RPL31		3.69348e-153	-0.584941	MET		5.54522e-177	-0.113278	TIMELESS		1.16145e-48	-1.66433	KCTD10		1.04189e-36	-1.72007	ZNF106		2.44908e-37	-2.21582	CALCOCO1		4.08015e-37	-2.20592
174	RPS3A		1.01149e-176	-1.09631	RAMP1		1.72143e-152	-0.582356	SUMO2		9.91699e-177	-0.112822	S100P		2.19098e-48	-1.6624	CBLC		1.59493e-36	-1.71941	SLC25A25		2.72146e-37	-2.21087	MTMR10		4.62517e-37	-2.19953
175	SLC16A3		3.13145e-176	-1.09559	PAG1		5.68154e-152	-0.581727	LPP		1.49711e-176	-0.112804	SLC7A5		2.57896e-48	-1.65927	ZWINT		1.80978e-36	-1.71874	ZBTB16		2.94991e-37	-2.20123	SEC22C		5.10332e-37	-2.19389
176	SLC25A39		4.4529e-175	-1.09242	FXYD5		9.08281e-152	-0.579427	MGST1		3.69469e-176	-0.111526	INTS8		3.25009e-48	-1.65466	PRKCH		2.36916e-36	-1.71745	LDLR		3.47818e-37	-2.20089	RMDN3		5.77779e-37	-2.17179
177	GLS		5.35545e-174	-1.09051	TUBA4B		1.34025e-151	-0.578688	TAGLN2		3.94725e-176	-0.111222	SPDEF		3.26989e-48	-1.65465	NUSAP1		4.11679e-36	-1.7156	SRGAP2C		3.91277e-37	-2.19995	PHACTR2		6.13519e-37	-2.16372
178	PMEPA1		6.86599e-172	-1.08856	DPP4		8.76115e-151	-0.577381	ITGA3		1.96828e-175	-0.110705	CENPK	Prognostic genes	4.95006e-48	-1.6488	OCIAD2		4.11679e-36	-1.71347	PRICKLE2		4.25251e-37	-2.19486	NHSL1		6.78643e-37	-2.16223
179	RPS4X		1.05123e-171	-1.08627	CYP4B1		3.14088e-150	-0.575537	SSR3		1.86321e-174	-0.110101	KRT80		1.30388e-47	-1.64349	SLC1A1		4.21265e-36	-1.70975	TIMP3		9.59092e-37	-2.18786	SFTPC	Known disease genes	7.11714e-37	-2.15151
180	TOMM20		1.74221e-171	-1.08523	CCDC78		5.02012e-150	-0.572786	CAPS		3.44757e-174	-0.107625	GYPC		2.14811e-47	-1.64258	VEPH1		4.44567e-36	-1.70909	CALCOCO1		1.12006e-36	-2.18767	SYNJ2		9.41311e-37	-2.14622
181	SFTPA1		1.95069e-170	-1.07445	CAPN1		7.25586e-150	-0.570576	C1orf194		4.28424e-174	-0.106909	WFS1		2.56563e-47	-1.6363	DAPK2		5.72198e-36	-1.70449	CACNB4		1.23534e-36	-2.1867	SLC2A1	Prognostic genes	1.06362e-36	-2.1457
182	SERPINA1		2.35073e-170	-1.07196	FAM166B		1.23242e-149	-0.569162	TMEM147		9.35208e-174	-0.105991	TRAF4		2.64103e-47	-1.63253	GMFG		7.62359e-36	-1.70034	FBLN5		1.56527e-36	-2.17959	GGCT		1.22959e-36	-2.14537
183	LAMTOR2		6.67083e-169	-1.07146	IER3		2.50306e-149	-0.568829	ISG15		1.04254e-173	-0.105647	TACC1		3.73899e-47	-1.63028	MAFF		1.25023e-35	-1.69852	RCC1		1.57446e-36	-2.17088	CFD		1.54215e-36	-2.13833
184	C9orf116		1.06107e-168	-1.07048	KRT18		3.27828e-149	-0.566616	PDZK1IP1		5.68882e-173	-0.105467	TGFBR2		4.01707e-47	-1.62523	DIXDC1		1.86013e-35	-1.68817	EGR2		1.96459e-36	-2.16404	MARCO		1.60654e-36	-2.1369
185	CD47		6.80176e-168	-1.06838	CAT		2.43431e-148	-0.566392	IFI6		3.92336e-172	-0.105368	CD52		6.62324e-47	-1.62479	ALOX5AP		2.31246e-35	-1.68556	MYADM		2.50841e-36	-2.16354	CBLC		2.07223e-36	-2.12943
186	ADIRF		1.62861e-167	-1.06382	PHLDA1	Prognostic genes	3.93948e-148	-0.560862	SUB1		1.32032e-171	-0.104809	LDLR		6.62538e-47	-1.62472	FAM71A		2.62335e-35	-1.68344	KLF9		2.60391e-36	-2.15796	DAPK2		2.30013e-36	-2.12794
187	UQCRQ		2.30154e-167	-1.06037	LDLRAD1		6.57825e-148	-0.560785	LSR		1.92784e-171	-0.103943	SLC50A1		8.0837e-47	-1.61983	ANKS1A		2.63351e-35	-1.67938	MVB12B		2.84094e-36	-2.15676	TNFRSF21		2.41715e-36	-2.11034
188	RSPH1	Prognostic genes	5.44292e-167	-1.06035	AQP5		1.88849e-147	-0.557433	APLP2		2.02084e-171	-0.103565	HPS5		8.25659e-47	-1.61837	SIDT2		2.71454e-35	-1.67422	KIAA0040		2.90909e-36	-2.15542	DLC1		4.07319e-36	-2.10819
189	PHLDA3		2.23354e-166	-1.05682	SSR3		2.69015e-147	-0.555892	S100A2		2.10097e-171	-0.102956	PLPP3		1.00808e-46	-1.61825	PDK4		2.88795e-35	-1.67211	KLF2		3.20514e-36	-2.15007	CPB2		4.09439e-36	-2.1067
190	NPEPPS		2.84667e-166	-1.05496	KLK11		6.20707e-147	-0.555673	HINT1		3.21347e-171	-0.102544	EIF2AK1	Known disease genes	1.94215e-46	-1.61601	PDIA4		2.95572e-35	-1.66844	MYO19		3.42498e-36	-2.14582	PLA2G4F		4.50673e-36	-2.08912
191	SSR4	Prognostic genes	1.59198e-165	-1.05403	ARHGDIB		6.95448e-147	-0.555523	HMGA1		2.29033e-170	-0.102213	LMNB1	Known disease genes	2.84179e-46	-1.61526	C1orf198		3.67733e-35	-1.66752	PDK4		3.62462e-36	-2.13928	FANCA		5.95126e-36	-2.08864
192	MRPS12		1.79524e-165	-1.0472	ID4		1.28064e-146	-0.548981	SLPI		3.97631e-170	-0.101378	PGM2L1		3.19739e-46	-1.60934	MVB12B		3.73921e-35	-1.66684	ATIC		3.63878e-36	-2.12958	KLF4		7.30107e-36	-2.08601
193	PTMA		2.90784e-165	-1.04174	DNTTIP1	Prognostic genes	4.54323e-146	-0.546703	RPL9		3.42247e-169	-0.10016	PDK1		3.3469e-46	-1.60563	KAT2A		4.68661e-35	-1.66588	TPPP3		4.56348e-36	-2.11498	GJB2		7.4502e-36	-2.06776
194	TSPAN1		4.66657e-165	-1.03824	PRDX5		6.36784e-146	-0.545866	ASCC2		6.15569e-169	-0.0999106	PHACTR1		5.20117e-46	-1.60513	UBE2C		4.8842e-35	-1.66461	ENG		5.19946e-36	-2.10697	JDP2		7.61901e-36	-2.06271
195	FSCN1		3.11622e-164	-1.03618	C11orf97		1.50687e-145	-0.537419	OST4		7.81413e-169	-0.099309	DCAF13		8.18849e-46	-1.60329	STX1A		5.17777e-35	-1.66125	BNIP2		7.6911e-36	-2.09813	SLC35F2		1.04932e-35	-2.0503
196	AURKAIP1		8.85839e-164	-1.03439	WDR38		1.574e-145	-0.534219	CAT		5.11325e-168	-0.0992727	HMGA1		1.01293e-45	-1.59508	GGA2		7.4393e-35	-1.66035	RBMS3		7.97971e-36	-2.09729	RHBDL2		1.25077e-35	-2.04507
197	SQSTM1		9.57715e-164	-1.03438	ERICH3		3.35665e-145	-0.533654	NDUFB4		3.21994e-167	-0.0990604	FKBP11	Known disease genes	1.53555e-45	-1.59478	NME1		8.20449e-35	-1.65683	AATK	Known disease genes	8.1975e-36	-2.08525	UNC5CL		1.33545e-35	-2.04435
198	PYCR1		2.67632e-162	-1.03174	AP1S1		3.53966e-145	-0.533168	SSR4	Prognostic genes	5.90413e-167	-0.098501	CCT3		1.72982e-45	-1.59441	MTMR10		8.30167e-35	-1.65434	CLIC3		9.01941e-36	-2.08392	PLEK2		1.5019e-35	-2.04396
199	IRF7		3.84603e-161	-1.02129	NPM1	Known disease genes	7.62875e-144	-0.531402	COX7C		9.64833e-167	-0.0984229	SLC25A25		1.85633e-45	-1.58999	FUT2		8.37929e-35	-1.65391	VAMP2		1.04469e-35	-2.0835	KLF9		1.97783e-35	-2.04211
200	PABPC1		7.06798e-161	-1.01245	ACTG1		1.79529e-143	-0.529776	RPL15		2.45785e-166	-0.0983957	KDM5B		2.01997e-45	-1.58255	DONSON		8.8416e-35	-1.65018	CCDC69		1.10862e-35	-2.07323	HLA-E		2.60803e-35	-2.03594
201	CALR		1.94223e-160	-1.00934	MET		3.38968e-143	-0.529248	FAM3C		1.97789e-165	-0.0983183	SFXN4		2.28043e-45	-1.57916	EGR2		9.13836e-35	-1.64943	TNFRSF21		1.20731e-35	-2.07193	KIAA0040		2.96186e-35	-2.03246
202	MT-ATP6		3.14225e-160	-1.00497	CRTAC1		9.06903e-143	-0.529042	TNC		2.84349e-165	-0.0980661	ANKRD22		2.99369e-45	-1.5775	PDZD2		1.00451e-34	-1.64411	GAS6		1.35677e-35	-2.06844	VEPH1		3.12963e-35	-2.03068
203	TAGLN2		7.66319e-160	-1.00203	RAC1	Prognostic genes	1.04411e-142	-0.528633	RPS20		3.53223e-163	-0.0976685	SBK1		3.36646e-45	-1.577	NHSL1		1.02211e-34	-1.64166	TMEM177		5.0652e-35	-2.06197	VAMP2		3.46057e-35	-2.02852
204	NAPSA		8.73019e-160	-0.990568	PHLDA3		1.34411e-142	-0.524529	FAM183A		3.04905e-162	-0.0976439	PMM2		5.25354e-45	-1.5747	GPM6B		1.20141e-34	-1.63893	FRY		5.79851e-35	-2.04629	C20orf194		3.91551e-35	-2.02793
205	SUMO3		1.15899e-159	-0.990139	CTSC		4.83154e-142	-0.522083	CAPN1		1.25072e-161	-0.0975054	SPATS2		5.62601e-45	-1.57423	E2F3		1.24072e-34	-1.63836	MAP3K3		6.58059e-35	-2.04064	INTS8		3.98024e-35	-2.02515
206	PSMB3		1.02029e-158	-0.98691	KDELR2		4.96817e-142	-0.520961	DUSP6		1.25481e-161	-0.0975047	DKC1		7.61937e-45	-1.57304	FERMT1		1.39048e-34	-1.62753	SH3BP5		7.96002e-35	-2.03527	RASGEF1B		4.41099e-35	-2.02504
207	MDK		1.91143e-158	-0.985997	MRPS12		1.45821e-141	-0.519571	NUPR1		2.34967e-161	-0.097362	MROH6		9.75017e-45	-1.57123	PHACTR2		1.41891e-34	-1.62749	SOCS2		9.65341e-35	-2.03244	GAB1		4.81658e-35	-2.02503
208	ETV4		1.49205e-157	-0.984769	UQCC2		1.52201e-141	-0.51916	TMPRSS4		3.21664e-160	-0.0970382	SPRYD7		1.59156e-44	-1.57089	PIP5K1B		1.93051e-34	-1.62279	FAM136A		1.14665e-34	-2.03014	HSD17B6		4.92816e-35	-2.02359
209	CNIH4		1.56818e-157	-0.984518	PMEPA1		7.16235e-141	-0.5189	ZMYND10		2.16719e-159	-0.0960346	POLG2		1.78145e-44	-1.56889	EMP1		3.27723e-34	-1.62274	KCTD10		1.42146e-34	-2.0298	PDZD2		5.63027e-35	-2.01299
210	TMED9		2.22583e-157	-0.984278	CDHR3		9.128e-141	-0.51885	ADGRF1		3.07397e-159	-0.0950156	COL1A1		2.67673e-44	-1.56834	ICAM2		3.72053e-34	-1.61928	MARCKSL1		1.55873e-34	-2.02723	BNIP2		5.754e-35	-2.01295
211	CCND1		3.23305e-157	-0.975103	CTSA	Prognostic genes	1.36082e-140	-0.518782	TNFRSF21		3.61685e-158	-0.0948674	MCM2		2.69488e-44	-1.56184	RHBDL2		5.09338e-34	-1.61653	EPCAM		1.86648e-34	-2.0261	LATS2	Known disease genes	6.52435e-35	-2.00754
212	RPL29		7.2862e-157	-0.974922	IGFBP4		4.23623e-140	-0.518253	UQCC2		6.47759e-158	-0.0948367	TRAP1		3.42502e-44	-1.56089	GADD45B		6.38607e-34	-1.6162	SORBS1		1.89336e-34	-2.02567	DPYSL2		6.62527e-35	-2.00086
213	FGGY		1.0609e-156	-0.974894	S100A10		1.50424e-139	-0.517329	NACA		2.67417e-156	-0.0941567	UBFD1		3.58732e-44	-1.56022	MYH10		6.52106e-34	-1.61612	N4BP2L1		2.16621e-34	-2.0246	MARCKSL1		7.07543e-35	-2.00085
214	MRPS31		2.0686e-156	-0.971159	TMEM190		2.51702e-139	-0.516102	CEACAM5		6.48637e-155	-0.0940773	PAK1	Prognostic genes	5.21446e-44	-1.549	TNFRSF21		7.61511e-34	-1.61409	DLC1		2.5997e-34	-2.01861	FBLN5		8.14375e-35	-1.9989
215	CAV1		5.47968e-156	-0.968344	ZMYND10		6.1935e-139	-0.515048	NDUFS6		1.29042e-154	-0.0939343	ATAD2		7.12254e-44	-1.54872	SOX4		8.63726e-34	-1.60761	P3H2		2.6037e-34	-2.01271	PPM1D		1.0415e-34	-1.99519
216	GPX1		1.30156e-155	-0.962546	FAM183A		9.13038e-139	-0.514094	MRPS12		1.62432e-154	-0.0937501	BZW2	Known disease genes	1.02063e-43	-1.54774	PLPP2		9.22669e-34	-1.60712	SLC16A11		3.41592e-34	-2.00986	KLF13		1.38047e-34	-1.98968
217	AP1S1		4.68245e-155	-0.960501	DNAH12		1.36052e-138	-0.513945	CYP4B1		1.21263e-153	-0.0937429	JDP2		1.05368e-43	-1.54119	NARF		9.58164e-34	-1.60383	KAT2B		3.72052e-34	-2.00627	KCTD10		1.39213e-34	-1.98568
218	PLAU	Prognostic genes	7.69847e-154	-0.96006	SLC25A39		4.62561e-138	-0.513755	AGER		2.76589e-153	-0.0934036	ADAMTS1		1.15995e-43	-1.54086	CSRP1		1.08762e-33	-1.6015	HMGB3		3.93721e-34	-2.005	AHNAK		1.62036e-34	-1.97984
219	ASPH		2.88309e-153	-0.959887	RPL29		7.25267e-138	-0.509886	SEC61G		1.34355e-151	-0.0931854	PLEKHA8		1.3754e-43	-1.53473	KDELR3		1.20189e-33	-1.59679	CA2		4.15006e-34	-2.00304	HSPB8		1.64154e-34	-1.97358
220	NHP2		3.11715e-153	-0.959764	LSR		8.55208e-138	-0.509157	CLPTM1L	Known disease genes / Prognostic genes	2.05933e-151	-0.0918364	TYMS	Known disease genes	1.48715e-43	-1.53319	DUOX1		2.17422e-33	-1.59033	NCF2		4.21423e-34	-2.0015	NARF		1.98772e-34	-1.97134
221	LMNA	Known disease genes	3.57687e-153	-0.959125	MUC21		3.87379e-137	-0.503714	MUC1		2.09835e-151	-0.0915605	SIX4		1.53603e-43	-1.52713	BNIP2		2.4072e-33	-1.58926	MYL9		4.98073e-34	-1.99848	PRKCH		2.51385e-34	-1.95838
222	MAL2		1.1892e-152	-0.958659	EEF1D		2.0996e-136	-0.501072	ABCA3		4.2111e-151	-0.090469	SYNPO		1.85326e-43	-1.52222	C11orf80		2.53661e-33	-1.58546	EIF2AK1	Known disease genes	5.11873e-34	-1.99834	C1orf198		2.97517e-34	-1.95659
223	TOMM7		2.08669e-152	-0.957192	FOLR1		2.16964e-136	-0.501001	SYNGR2		6.30051e-151	-0.0899698	FHL2		2.22297e-43	-1.51757	PAFAH1B3		3.2819e-33	-1.58396	ALOX5AP		5.17964e-34	-1.99512	HS6ST2		4.82297e-34	-1.95492
224	RAB34		6.28639e-152	-0.954692	NENF		1.50159e-135	-0.499332	ARHGDIB		4.87825e-150	-0.0894669	RFC4	Known disease genes	2.60125e-43	-1.50958	SNX2		3.28599e-33	-1.58355	ERO1A		5.74527e-34	-1.99169	ARL13B		5.83944e-34	-1.9519
225	ARNT2		1.00882e-151	-0.950856	SLC25A37		5.02023e-135	-0.498941	CALR		8.28562e-150	-0.089229	WDR75		2.6888e-43	-1.50936	HACD4		3.28711e-33	-1.58329	OCIAD2		6.28338e-34	-1.98846	SLC1A1		6.74646e-34	-1.94974
226	OSMR		2.85019e-150	-0.948971	CATSPERD		2.40597e-133	-0.498085	DNAAF1		1.0925e-149	-0.0889446	MANF		2.93661e-43	-1.50672	EPCAM		3.6129e-33	-1.58278	COL1A1		6.6298e-34	-1.98722	GGA2		6.77103e-34	-1.94467
227	FXYD5		7.5678e-149	-0.944318	ZDHHC9		1.00023e-132	-0.497546	TMEM167A		1.33786e-149	-0.0888065	TPBG		3.41159e-43	-1.50629	MCM4		3.7156e-33	-1.57854	FILIP1		7.22595e-34	-1.97909	DIXDC1		7.54471e-34	-1.94184
228	PGK1	Prognostic genes	3.30827e-148	-0.941236	CAPSL		3.50021e-132	-0.496891	NAP1L1		1.37498e-149	-0.0887435	RCCD1	Prognostic genes	3.51407e-43	-1.50603	ARHGAP18		3.79191e-33	-1.57744	CD83		9.3414e-34	-1.97816	CCDC69		1.15441e-33	-1.9353
229	PHLDA1	Prognostic genes	2.51162e-147	-0.940267	ASPH		5.71618e-132	-0.496516	IER3		1.43301e-149	-0.0877137	LAD1		5.27097e-43	-1.50461	GAB1		4.01819e-33	-1.57733	MEF2A		1.09088e-33	-1.97266	ECT2		1.21887e-33	-1.93345
230	RNF213		1.09204e-145	-0.940182	S100A4		1.33235e-131	-0.495999	LRRC36		3.66883e-149	-0.0871324	FERMT2		8.05919e-43	-1.49478	ARHGEF16		4.54989e-33	-1.57261	PIAS1		1.21397e-33	-1.96446	PDK4		1.24255e-33	-1.92976
231	EPCAM		1.47747e-145	-0.939324	CA2		2.13279e-131	-0.495226	RAB34		4.91504e-148	-0.0869936	POLR2H		8.64956e-43	-1.4945	PTPN1		4.8626e-33	-1.56705	NR4A3		1.22181e-33	-1.9635	CFL2		1.742e-33	-1.92735
232	RPS24		1.47747e-145	-0.938443	CFAP73		4.36386e-131	-0.494979	UQCRQ		9.99476e-148	-0.0869192	GNL3		8.8545e-43	-1.49439	TMPRSS4		5.0997e-33	-1.56395	PROS1		1.47109e-33	-1.95656	SECISBP2L		1.9885e-33	-1.92401
233	RPL7		3.31764e-145	-0.9384	LRRC46		5.10674e-131	-0.492551	ERO1A		1.29092e-147	-0.0868068	CBX7	Prognostic genes	1.36901e-42	-1.49325	SRGAP2C		5.14951e-33	-1.56318	KLF13		1.79562e-33	-1.95437	CYBRD1		2.23246e-33	-1.92135
234	RPS6		3.08525e-144	-0.938	MARCO		5.47444e-131	-0.490988	CHI3L1		1.44356e-147	-0.0865165	LAMP3		1.60028e-42	-1.48747	JUND		5.7252e-33	-1.56104	FGFR2	Known disease genes	2.38854e-33	-1.94713	FABP5		2.62308e-33	-1.91774
235	NBL1		3.99555e-144	-0.937453	GUK1		9.62745e-130	-0.490977	SLC25A39		1.5958e-147	-0.0861732	SLC39A11	Prognostic genes	1.6245e-42	-1.48716	NTN4		5.73919e-33	-1.55569	GGA2		2.58839e-33	-1.94375	PMM2		2.94235e-33	-1.91742
236	PFDN2		5.24601e-144	-0.937403	PYCR1		1.14767e-129	-0.489112	LAMTOR2		6.50901e-147	-0.0843911	FEN1		1.79998e-42	-1.48619	PID1		5.98283e-33	-1.55515	ARHGAP18		2.69812e-33	-1.94043	ERO1A		3.13015e-33	-1.91653
237	ITGA2		5.59515e-143	-0.935233	IRF7		3.59236e-129	-0.488582	ST14		2.1519e-146	-0.0842213	QKI		1.92276e-42	-1.48559	HMGB3		6.47007e-33	-1.55458	GNG11	Known disease genes	2.87093e-33	-1.93076	KDM5B		3.16216e-33	-1.91255
238	RPS20		2.52703e-142	-0.935217	ASRGL1		9.50166e-128	-0.488563	CKLF		2.57488e-146	-0.0838589	STK39	Known disease genes	2.43921e-42	-1.47896	CCDC69		6.58978e-33	-1.55149	ANKS1A		3.52061e-33	-1.92738	MAP3K3		3.41454e-33	-1.91159
239	HMGN1		4.7214e-142	-0.934529	MBOAT2		1.0135e-127	-0.487424	ACTB		3.35037e-146	-0.0835356	SLC29A4		2.52306e-42	-1.47724	HELLS	Known disease genes	7.54181e-33	-1.55039	C1orf198		3.75008e-33	-1.92734	SYT12		3.81335e-33	-1.9112
240	RPL18		8.77997e-142	-0.932553	TNFRSF21		2.7254e-127	-0.486084	DYNLRB2		9.03717e-146	-0.0831674	LY6D		2.78353e-42	-1.47449	ARHGAP24		8.42592e-33	-1.5464	TMEM220		3.83656e-33	-1.92523	CHEK1	Prognostic genes	3.94195e-33	-1.90659
241	ERO1A		9.93344e-142	-0.931059	HBB		6.15684e-127	-0.484838	CDC42EP1		1.01938e-145	-0.0829256	PALMD		3.00805e-42	-1.47369	GPT2		1.05227e-32	-1.54179	SECISBP2L		4.27383e-33	-1.92457	WIF1		4.28205e-33	-1.90536
242	HNRNPC		1.39564e-141	-0.926809	STK32A		7.78784e-127	-0.483857	NUCKS1		1.52312e-145	-0.0823636	PUS7		3.27325e-42	-1.46841	ANXA3		1.17758e-32	-1.54169	APBB1		4.94964e-33	-1.92441	WDR75		4.54445e-33	-1.90438
243	SERPINH1		2.87334e-141	-0.925784	ETV4		1.59818e-126	-0.483531	RPL26		2.30861e-145	-0.081948	AGTPBP1		4.73947e-42	-1.46783	MEF2A		1.69863e-32	-1.54084	SHROOM4		5.61345e-33	-1.92337	DCAF13		4.82569e-33	-1.90013
244	RPL9		6.43077e-141	-0.925027	GPI		2.69592e-126	-0.483339	PON2		7.21711e-145	-0.0819315	C1orf162		7.21642e-42	-1.46766	SLC25A10		1.78811e-32	-1.53726	ALOX5	Known disease genes	5.78851e-33	-1.92312	POLG2		5.95066e-33	-1.90005
245	ADGRF1		1.08612e-140	-0.922214	CACNA2D2	Prognostic genes	3.00622e-126	-0.483173	LMNA	Known disease genes	1.29792e-144	-0.0812059	CENPL		7.53245e-42	-1.46649	ADD1		1.9222e-32	-1.53225	CCT3		1.02899e-32	-1.92132	SLC25A10		6.24386e-33	-1.89905
246	FABP6		1.38424e-140	-0.918984	PAFAH1B3		4.56483e-126	-0.48097	SQSTM1		2.67235e-144	-0.080953	TRIP13		8.06979e-42	-1.46602	MDK		2.01697e-32	-1.52934	HLA-E		1.25482e-32	-1.92016	FANCF		6.61871e-33	-1.89713
247	JTB		3.79366e-140	-0.911821	CFAP43		1.71243e-125	-0.480515	TOMM20		5.7885e-144	-0.0809139	TIMM8A		8.5651e-42	-1.46451	SLC35F2		2.90375e-32	-1.52716	NLN		1.28988e-32	-1.91693	FLAD1		6.63026e-33	-1.89665
248	PTP4A2	Prognostic genes	8.22557e-140	-0.908686	NME4		3.17315e-125	-0.480086	PAFAH1B3		1.33416e-143	-0.0807151	EGLN3		8.64057e-42	-1.46419	FLAD1		2.98984e-32	-1.52059	PPP1R14B		1.36956e-32	-1.91576	ANKS1A		7.06758e-33	-1.89608
249	TNFSF10	Known disease genes	2.40844e-139	-0.905867	DUOX1		6.69805e-125	-0.479685	IFITM3		2.3339e-143	-0.0806963	TLCD1		1.05439e-41	-1.46091	PCYOX1		3.33679e-32	-1.52033	GPRIN2		1.66144e-32	-1.91324	CRABP2		8.12819e-33	-1.8942
250	NACA		4.98985e-139	-0.902916	CFAP157		8.82059e-125	-0.479081	KRT8		5.14874e-143	-0.079914	CEACAM1		1.16373e-41	-1.45604	TNFSF12		3.74937e-32	-1.51583	KDM5B		1.70368e-32	-1.91306	SLC25A25		9.17021e-33	-1.8848
251	C1orf122		5.6196e-139	-0.902654	RSPH9		9.99339e-125	-0.478895	NHP2		1.61781e-142	-0.0797869	MSI2		1.23441e-41	-1.455	SH3BGRL		4.33528e-32	-1.51131	DPYSL2		2.30942e-32	-1.91154	ACP5		1.1099e-32	-1.88396
252	PIFO	Prognostic genes	1.36634e-138	-0.90079	RGS10		1.00631e-124	-0.477572	EPCAM		1.39033e-141	-0.0796363	MSR1		1.3064e-41	-1.45489	EIF2AK1	Known disease genes	4.37836e-32	-1.51041	GALNT18		2.62829e-32	-1.91053	MDK		1.39986e-32	-1.86886
253	CDC42EP1		1.69433e-138	-0.90053	EMB		2.43819e-124	-0.476565	C19orf33		3.81744e-140	-0.0795729	RILPL2		1.35608e-41	-1.45361	CFL2		5.29748e-32	-1.50984	MITF		2.70786e-32	-1.91041	AFF3		1.64157e-32	-1.86689
254	RPL15		2.15069e-138	-0.896823	PPIA		3.10826e-124	-0.475851	RSPH1	Prognostic genes	8.79813e-140	-0.0789198	FUT3		1.41878e-41	-1.45199	GGCT		5.30308e-32	-1.50945	ANXA3		2.8092e-32	-1.9027	MEF2A		2.49344e-32	-1.86321
255	NFE2L3		3.06225e-138	-0.889175	CCDC17		3.25897e-124	-0.475209	LSM2		1.15784e-139	-0.0788386	SGPL1		2.11298e-41	-1.44985	INTS8		8.53897e-32	-1.5068	TNFSF12		3.35849e-32	-1.90134	EIF2AK1	Known disease genes	2.58314e-32	-1.86296
256	MT-ND4		5.51689e-138	-0.884445	TSPAN8	Prognostic genes	4.64142e-124	-0.473534	CES1		1.32672e-139	-0.0787902	OLR1		3.06314e-41	-1.44404	LRRFIP1		9.25366e-32	-1.50363	LPL		5.29926e-32	-1.89904	GMFG		2.62217e-32	-1.86284
257	EPS8		3.10301e-137	-0.883945	GNG11	Known disease genes	5.29465e-124	-0.472251	HEBP2		1.73114e-138	-0.0787501	TFB2M		3.06314e-41	-1.43987	RAP1A		9.79503e-32	-1.49867	ARHGEF3		6.32518e-32	-1.89766	HACD4		2.88387e-32	-1.84943
258	DSG2		5.91131e-137	-0.878178	SDC1		8.43764e-124	-0.472235	IGFBP4		2.4039e-138	-0.0770871	GOLGA7B		3.53802e-41	-1.43835	UNC5CL		1.23974e-31	-1.49845	TTLL7		6.59676e-32	-1.89738	GPC3		2.99833e-32	-1.84167
259	NUCKS1		7.56446e-137	-0.875624	AQP4	Known disease genes	2.15149e-123	-0.472009	ASPH		3.00377e-138	-0.0770712	RNF144B		4.17846e-41	-1.43666	FANCA		1.34457e-31	-1.49817	SCAI		6.61124e-32	-1.88009	SFXN4		3.0149e-32	-1.84022
260	C19orf33		9.01773e-137	-0.87519	ITGA2		2.21331e-123	-0.471677	TPT1		1.82988e-137	-0.0770131	STEAP1		4.87771e-41	-1.42783	FOSB		1.69114e-31	-1.49792	SIDT2		7.38419e-32	-1.87475	ARHGAP18		3.48445e-32	-1.83412
261	FABP5		2.64437e-136	-0.869388	CFAP53		3.32807e-123	-0.471247	SH3BGRL3		5.98101e-137	-0.0769977	ENG		6.7755e-41	-1.42456	CYBRD1		1.83601e-31	-1.49696	ARHGAP44		2.01362e-31	-1.87422	ARHGAP24		3.57725e-32	-1.83222
262	TPPP3		2.99675e-136	-0.868784	NKG7		4.87141e-123	-0.470305	CCDC78		6.07644e-137	-0.0768713	PFKP		6.85212e-41	-1.42144	FRY		2.03644e-31	-1.49656	PAQR5		2.47176e-31	-1.87087	UBFD1		3.69875e-32	-1.83023
263	BST2		7.06687e-135	-0.86798	HLA-A		1.09861e-122	-0.469294	PLS3		2.50684e-136	-0.0763442	GMPPA		6.96956e-41	-1.41586	PRICKLE2		2.4115e-31	-1.49592	NTN4		3.05016e-31	-1.87005	PID1		4.86315e-32	-1.82888
264	MPZL2		7.13934e-135	-0.86702	IFI44L		1.17697e-122	-0.46836	AP1S1		3.00709e-136	-0.0757113	GPR89A		8.08806e-41	-1.41477	UBFD1		2.72515e-31	-1.49454	CCDC50		3.31948e-31	-1.86817	NCF2		5.20753e-32	-1.82385
265	SPINT2		1.01876e-134	-0.863979	MX1		1.27193e-122	-0.466401	EIF1		4.3517e-136	-0.075397	RHOV		9.13888e-41	-1.41456	ECT2		2.93442e-31	-1.4925	NDRG2		3.58289e-31	-1.8667	ALOX5	Known disease genes	5.40025e-32	-1.81063
266	ZNF593		1.61296e-134	-0.861274	KRT10		3.03313e-122	-0.466223	RPS28		4.89368e-136	-0.075067	CAV2		9.97113e-41	-1.41407	SYNJ2		3.07287e-31	-1.48981	CD68		3.79676e-31	-1.86639	CALM1		5.75364e-32	-1.80912
267	EIF1		7.93956e-134	-0.860756	ATP10B		1.11321e-121	-0.464307	LGALS3		3.03392e-135	-0.0750188	MRPL3		1.1951e-40	-1.41289	MARCKSL1		4.1402e-31	-1.48557	SNX2		4.59359e-31	-1.86388	ECE2		6.75997e-32	-1.80751
268	EIF3H		8.02844e-134	-0.860439	TTN	Known disease genes	1.68375e-121	-0.463416	PSMB3		3.62198e-135	-0.0750109	BCL9		1.35182e-40	-1.40888	CYP27A1		4.15226e-31	-1.47711	PCYOX1		5.06838e-31	-1.85891	PCYOX1		7.95477e-32	-1.8062
269	YWHAZ		8.0392e-134	-0.856175	LAD1		1.86151e-121	-0.463087	CNIH4		7.12995e-135	-0.0749747	HSH2D	Prognostic genes	1.58991e-40	-1.40768	GALNT18		4.35748e-31	-1.47532	FRMD4B		5.43139e-31	-1.85675	GATA6		8.2534e-32	-1.80416
270	FAM229B		1.13375e-133	-0.852258	OSMR		1.06932e-120	-0.462166	CTSC		8.6674e-135	-0.074196	AVL9		1.67853e-40	-1.40705	TRAP1		4.63004e-31	-1.47453	USP12		6.37594e-31	-1.83876	BZW2	Known disease genes	8.56393e-32	-1.79635
271	SEC61G		1.32045e-133	-0.85001	HMGA1		1.14031e-120	-0.460229	RPL5		1.77466e-134	-0.0736986	BOP1		1.69533e-40	-1.40633	PROS1		4.79178e-31	-1.47319	KAT2A		7.05214e-31	-1.83787	TIMM8A		9.61924e-32	-1.79578
272	UBB	Prognostic genes	1.37778e-133	-0.849124	PLAU	Prognostic genes	1.68561e-120	-0.459711	IGFBP3		2.2939e-134	-0.0730889	PHLDA2		2.64299e-40	-1.40214	STOM		5.06269e-31	-1.47223	CALM1		8.51932e-31	-1.82764	LMNB1	Known disease genes	1.01283e-31	-1.79482
273	LSM5		3.44479e-133	-0.849007	RPS24		1.88944e-120	-0.456418	FBL	Known disease genes	3.03631e-134	-0.0728875	CBX3		3.63779e-40	-1.40166	SLC44A2		5.17921e-31	-1.46794	ACP5		9.19184e-31	-1.82044	MVB12B		1.14838e-31	-1.79474
274	WFDC2	Prognostic genes	4.19274e-133	-0.848792	GSTA1	Prognostic genes	3.18499e-120	-0.456398	SLC25A37		3.90674e-134	-0.0727922	PKP3		4.02441e-40	-1.4006	KDM5B		5.61365e-31	-1.46674	CYBRD1		9.64802e-31	-1.81769	SPATS2		1.21853e-31	-1.79428
275	MT-CO3		1.20314e-132	-0.846656	BID		1.14763e-119	-0.456319	CHST9		5.37787e-134	-0.0727915	METTL7A		4.10262e-40	-1.39088	TRAF4		6.41804e-31	-1.45707	BCL2L2		1.24095e-30	-1.81625	PROS1		1.22377e-31	-1.79137
276	RALA	Prognostic genes	1.42746e-132	-0.845966	ECE1		2.65603e-119	-0.455813	HNRNPC		9.51888e-134	-0.072691	AMOTL1		4.25842e-40	-1.38972	SPI1		7.4627e-31	-1.45424	SCD5		1.29631e-30	-1.80994	ANXA3		1.25062e-31	-1.79041
277	MAP3K13		2.16683e-132	-0.84478	HLA-DRA		5.47261e-119	-0.455747	AURKAIP1		1.29608e-133	-0.0722401	FIG4		4.27115e-40	-1.3872	WDR75		7.48389e-31	-1.45355	RAP1A		1.9946e-30	-1.79981	TIMELESS		1.48332e-31	-1.78917
278	WDR54		2.5943e-132	-0.840336	C19orf53		8.06216e-119	-0.45562	LSM5		1.52899e-133	-0.0719775	MAP7D2		4.44041e-40	-1.38474	CLDN18		9.5895e-31	-1.44992	MDK		2.08934e-30	-1.79952	SIDT2		1.50787e-31	-1.78779
279	TNFRSF12A		1.41533e-131	-0.839617	MX2		9.94426e-119	-0.455596	MORN5		1.70428e-133	-0.0719381	NPM3	Known disease genes	6.93908e-40	-1.38425	CHEK1	Prognostic genes	1.0287e-30	-1.44778	C9orf24		2.15469e-30	-1.79909	GALNT7		1.77497e-31	-1.78668
280	PDCD5		1.43329e-131	-0.837318	CLPTM1L	Known disease genes / Prognostic genes	3.71184e-118	-0.453931	TOMM7		2.39863e-133	-0.0714206	PSMG3		8.07008e-40	-1.38076	SORBS1		1.07769e-30	-1.44532	PTPN1		2.20316e-30	-1.79534	TPPP3		1.77963e-31	-1.77969
281	IFITM3		4.09668e-131	-0.83485	IFNGR2		4.93206e-118	-0.453896	SNTN		3.94084e-133	-0.0713029	BPHL		8.71406e-40	-1.36679	ARHGEF3		1.40192e-30	-1.44291	UBL3		2.68288e-30	-1.79333	PIAS1		1.80573e-31	-1.77926
282	GPI		2.08338e-130	-0.832586	GDF15		5.64706e-118	-0.453112	EIF3H		7.46843e-133	-0.0710761	HEATR1		8.92108e-40	-1.36464	DKC1		2.15429e-30	-1.44114	TOP2A	Known disease genes	3.16086e-30	-1.79284	EPCAM		1.90953e-31	-1.77658
283	SNF8		2.93884e-130	-0.832498	PDZK1IP1		5.6652e-118	-0.452183	HMGN1		1.03832e-132	-0.0710665	GAPDH	Known disease genes / Prognostic genes	1.13054e-39	-1.36282	PMM2		2.73167e-30	-1.44027	CD302		3.64264e-30	-1.79197	GNL3		2.1185e-31	-1.7753
284	FAM162A		3.23706e-130	-0.832038	NECAB1		1.63988e-117	-0.45067	C9orf16		1.15479e-132	-0.0709733	MARVELD3		1.13054e-39	-1.35706	RFX2		2.84574e-30	-1.4399	RFX2		3.74134e-30	-1.78978	TRAP1		2.2787e-31	-1.77375
285	FBL	Known disease genes	1.03931e-129	-0.830443	SELENBP1	Prognostic genes	2.13661e-117	-0.449401	EREG	Prognostic genes	1.31337e-132	-0.0709318	PDCD2L		1.1404e-39	-1.35598	CCT3		2.95304e-30	-1.43014	ST6GALNAC2		3.74662e-30	-1.78859	P3H4		2.63057e-31	-1.76837
286	NAP1L1		1.03931e-129	-0.824593	KCNN4		5.41807e-117	-0.449194	ITGA2		8.77647e-132	-0.0707207	ST6GALNAC6		1.56709e-39	-1.35589	GALNT7		3.18999e-30	-1.42976	ADD1		4.00814e-30	-1.78849	DKC1		2.78401e-31	-1.76709
287	NECAB1		1.05921e-129	-0.822005	TUBB		1.54648e-116	-0.448958	ARPC3		4.2545e-131	-0.0705453	PC		1.81373e-39	-1.35315	FBP1		3.34934e-30	-1.42574	NARF		4.43573e-30	-1.78812	RGS17		3.20636e-31	-1.76631
288	KRT19		1.0859e-129	-0.8205	ZBBX		2.17001e-116	-0.44895	IFNGR2		9.80621e-131	-0.0704791	NQO1		1.85185e-39	-1.34734	SLC2A1	Prognostic genes	3.57357e-30	-1.41786	SGPL1		4.47706e-30	-1.78555	HHIP		3.72729e-31	-1.76482
289	ACTB		2.55337e-129	-0.820159	DUSP23		3.39319e-116	-0.448684	PGK1	Prognostic genes	1.1487e-130	-0.0703244	N4BP1		1.91556e-39	-1.34711	DBNDD1		3.93367e-30	-1.41633	AHNAK		4.53223e-30	-1.78347	PAFAH1B3		4.08794e-31	-1.7609
290	UBE2I		7.49392e-129	-0.820158	FAM89B		5.60773e-116	-0.448643	TESC		1.76247e-130	-0.0696094	PABPC1L		2.26818e-39	-1.3448	ERO1A		4.12153e-30	-1.41275	CBX3		4.80225e-30	-1.78163	TK1	Known disease genes / Prognostic genes	4.61865e-31	-1.76064
291	REEP3		1.25014e-128	-0.820038	TANC2		7.49982e-116	-0.447115	DUSP23		1.81256e-130	-0.0693543	KIAA0040		2.32482e-39	-1.3424	LIMCH1		4.32488e-30	-1.41177	XPR1		5.61244e-30	-1.77418	XPR1		4.64249e-31	-1.75521
292	ARPC3		1.52258e-128	-0.818749	TRIP6		1.0132e-115	-0.445064	RPL3		2.10136e-130	-0.0685596	ACP6		2.35903e-39	-1.33951	TK1	Known disease genes / Prognostic genes	4.53313e-30	-1.40412	FAM216B		6.41187e-30	-1.77276	ALOX5AP		5.12096e-31	-1.75189
293	PSMA7		4.21396e-128	-0.812361	DYNLRB2		1.20223e-115	-0.444747	CAPSL		3.97398e-130	-0.0682092	OSBPL11		2.56727e-39	-1.33855	EDN1		6.14564e-30	-1.39929	HYAL2		6.52947e-30	-1.77194	PLEKHA8		5.63628e-31	-1.75141
294	SRD5A3	Prognostic genes	4.77669e-128	-0.810818	GPX1		1.86528e-115	-0.442772	YWHAZ		1.18222e-129	-0.0681047	GFPT1		2.66161e-39	-1.33521	CXCL2		6.25844e-30	-1.39789	HSD17B4		7.25751e-30	-1.76639	ADD1		5.66151e-31	-1.74803
295	CFL1	Prognostic genes	8.68868e-128	-0.809802	GGCT		2.74342e-115	-0.439592	DUOX1		2.13971e-129	-0.0680963	TNFRSF18		2.78898e-39	-1.33491	TIMELESS		7.70346e-30	-1.39709	INPP5A		9.29934e-30	-1.76493	MSI2		6.56477e-31	-1.74417
296	CLTC		7.22191e-127	-0.809183	MGST1		4.88661e-115	-0.438839	RAMP1		3.28279e-129	-0.0675794	SMYD5		2.93973e-39	-1.32814	XPR1		7.8813e-30	-1.39577	LRRFIP1		1.20398e-29	-1.76223	CSRP1		6.57164e-31	-1.74401
297	DUS1L		8.47316e-127	-0.808959	SAXO2		1.41674e-114	-0.434835	CTSA	Prognostic genes	3.57685e-129	-0.0675406	RUSC1		3.0378e-39	-1.3268	HS6ST2		7.99778e-30	-1.39504	TTC28		1.20499e-29	-1.76167	SNX2		7.22656e-31	-1.74372
298	HEBP2		3.41533e-126	-0.808794	DRC3		4.43977e-114	-0.434741	CFL1	Prognostic genes	9.65085e-129	-0.0675107	FBXO32		3.09406e-39	-1.32531	DNAH14		9.03983e-30	-1.38832	TSPYL1		1.69176e-29	-1.75723	PEBP4		7.54597e-31	-1.74288
299	KDELR3		1.5676e-125	-0.806521	FAM3C		5.42863e-114	-0.432624	SEZ6L2		9.96909e-129	-0.0674129	ZNF692		3.25613e-39	-1.32357	PAK1	Prognostic genes	9.30056e-30	-1.38684	PTPRM		1.9476e-29	-1.75544	SGPL1		8.54662e-31	-1.74115
300	RNF181		2.09969e-125	-0.806508	ARNT2		7.24265e-114	-0.432616	PHLDA1	Prognostic genes	1.00483e-128	-0.0669481	KLF9		3.60221e-39	-1.32136	SFXN4		9.4134e-30	-1.38217	KNOP1		1.99277e-29	-1.75222	PGM2L1		8.55468e-31	-1.73718
301	RHEB		2.14213e-125	-0.805757	ST14		1.68756e-113	-0.430848	TMED9		1.16861e-128	-0.0669466	TARS2		3.80207e-39	-1.32016	SPATS2		1.0118e-29	-1.38215	DNAJB4		2.03383e-29	-1.75128	PTPN1		8.80685e-31	-1.73171
302	ASS1		2.70236e-125	-0.804966	IL20RA		3.12269e-113	-0.43083	EPS8		1.35817e-128	-0.0662816	FANCF		3.92812e-39	-1.31667	BCL2L2		1.03353e-29	-1.37579	CRY2		2.27566e-29	-1.75071	RCCD1	Prognostic genes	9.37056e-31	-1.73062
303	PSMD8		2.72507e-125	-0.803866	EPS8		4.30924e-113	-0.430094	RPS9		1.57477e-128	-0.0662127	SPRR1B		4.72907e-39	-1.31242	CCDC50		1.27645e-29	-1.37253	CSRP1		2.38489e-29	-1.74957	MRPL3		1.18809e-30	-1.71643
304	IGFBP4		2.82377e-125	-0.801974	LGALS3BP		1.09071e-112	-0.428609	GPI		6.0349e-128	-0.06607	RAC3		5.3341e-39	-1.31118	DCAF13		1.30294e-29	-1.36559	BZW2	Known disease genes	2.68401e-29	-1.74774	ARHGEF16		1.50124e-30	-1.71086
305	ODF3B		2.82377e-125	-0.801499	OAS1		1.22666e-112	-0.426368	PLAU	Prognostic genes	6.7491e-128	-0.0658156	KIF1C		5.3341e-39	-1.31113	PLEK2		1.49758e-29	-1.36115	CYP27A1		2.70073e-29	-1.74396	GKN2		1.52142e-30	-1.69881
306	ACTN4	Prognostic genes	6.86971e-125	-0.801263	IFI16		1.82011e-112	-0.423482	CFAP157		1.28777e-127	-0.0651912	SEMA5A		6.83715e-39	-1.30951	SGPL1		1.84615e-29	-1.35983	SLC15A2	Known disease genes	3.31466e-29	-1.74135	FRY		1.57341e-30	-1.69743
307	ENY2		1.74269e-124	-0.798667	PLAC8		3.94579e-112	-0.423467	TNFSF10	Known disease genes	1.43644e-127	-0.0649521	TRIM27		8.55356e-39	-1.30419	GNL3		1.85785e-29	-1.35556	UBFD1		3.58661e-29	-1.74097	LRRFIP1		1.63696e-30	-1.69741
308	TAPBP		1.17245e-123	-0.79367	ERRFI1		5.94324e-112	-0.422737	CLDN10		1.77349e-127	-0.0649309	HYAL2		8.79828e-39	-1.29734	RRAS		1.86989e-29	-1.35445	EDN1		4.43484e-29	-1.73934	SRGAP2C		1.86898e-30	-1.6968
309	GGCT		1.56757e-123	-0.789565	KRT7		6.08859e-112	-0.418511	C4orf48	Prognostic genes	2.07769e-127	-0.0649176	ADAM8		1.34297e-38	-1.2906	RALGPS2		2.02873e-29	-1.3522	PPARG		4.59069e-29	-1.73858	CCT3		2.01376e-30	-1.69498
310	MGST1		5.07375e-123	-0.786829	PXDN		9.82721e-112	-0.417172	MPZL2		2.36138e-127	-0.0639841	TMEM132A		1.56205e-38	-1.29021	CRABP2		2.02922e-29	-1.34511	SCGB1A1		5.38993e-29	-1.73401	PAK1	Prognostic genes	2.09305e-30	-1.69376
311	CALU		9.21782e-123	-0.785328	ABCA3		1.26483e-111	-0.416022	CACNA2D2	Prognostic genes	3.14322e-127	-0.0637902	ADAM28		1.58527e-38	-1.28902	ZBTB4		3.13071e-29	-1.34469	MRPL3		5.55616e-29	-1.72659	MYH10		2.30896e-30	-1.68853
312	CAPN1		1.13284e-122	-0.784474	HOXD1		1.68781e-111	-0.415499	GADD45B		1.23865e-126	-0.0637081	HSPD1		1.89498e-38	-1.28826	LMO7		3.16991e-29	-1.34352	CACNA2D2	Prognostic genes	6.48647e-29	-1.71912	UBL3		2.44183e-30	-1.68652
313	NEDD8		1.37717e-122	-0.784356	RPS11		2.83091e-111	-0.414689	SUMO3		3.04136e-126	-0.0635706	ADCK5		1.92777e-38	-1.28316	SLC12A4		3.29621e-29	-1.34104	SLC27A3		6.87813e-29	-1.71561	RAP1A		2.74531e-30	-1.68616
314	PRELID1		1.38394e-122	-0.782812	LPL		8.92423e-111	-0.413676	SKAP2		5.34927e-126	-0.0632561	ESAM		1.92855e-38	-1.2819	PDLIM1		3.32343e-29	-1.33971	GNL3		7.07665e-29	-1.71355	HSD17B4		2.80517e-30	-1.68545
315	CD63		3.45055e-122	-0.78235	PLS3		9.36231e-111	-0.412447	LRRIQ1		7.03231e-126	-0.0630856	MB		1.98825e-38	-1.28134	POLG2		4.28491e-29	-1.33689	MYH10		7.24063e-29	-1.71091	ARHGEF3		2.91808e-30	-1.68077
316	LRRIQ1		1.39405e-121	-0.782312	KCNK1		1.03554e-110	-0.41033	CD47		8.93385e-126	-0.0630123	AK4		1.9909e-38	-1.27931	SAMHD1		4.74402e-29	-1.33594	BORCS7		7.32877e-29	-1.70811	CD83		3.05095e-30	-1.68072
317	CARHSP1		2.52056e-121	-0.781802	ITGB4		1.24152e-110	-0.410213	MBOAT2		9.88898e-126	-0.0628657	ST14		2.05839e-38	-1.27707	RGS17		4.94756e-29	-1.33517	SLC12A4		7.4427e-29	-1.70589	NTN4		3.36752e-30	-1.67982
318	SKAP2		2.55632e-121	-0.780978	RP1		1.31609e-110	-0.409849	GGCT		9.93013e-126	-0.0628214	RTN4RL2		2.05914e-38	-1.27333	SMYD5		5.03732e-29	-1.33438	C1orf131		7.76594e-29	-1.70499	CCDC50		3.6792e-30	-1.67746
319	POLR2J		3.19068e-121	-0.77841	RIIAD1		1.85834e-110	-0.408937	CAV1		5.27371e-125	-0.0628082	CD36		2.78793e-38	-1.26947	SERPING1		5.17929e-29	-1.33252	OSBPL6		8.04922e-29	-1.70402	TRAF4		4.42744e-30	-1.67688
320	NDUFS8		5.1109e-121	-0.776482	CD9		3.02195e-110	-0.407246	RHEB		8.8238e-125	-0.0625663	CLDN18		3.03068e-38	-1.267	ECE2		5.54106e-29	-1.32779	C20orf85		8.61958e-29	-1.7007	RALGPS2		4.48937e-30	-1.67264
321	ERGIC1		7.45935e-121	-0.775628	CNIH4		3.38697e-110	-0.402949	TKT		1.09572e-124	-0.0625471	B4GALT2		3.2395e-38	-1.26511	SERINC2		5.63435e-29	-1.32307	CYP2U1		8.90749e-29	-1.69975	PLA2G1B		5.38464e-30	-1.6722
322	PDCD6		8.10935e-121	-0.774015	SNRPE		3.74682e-110	-0.402141	TTYH3		2.45148e-124	-0.0624197	CD83		3.33217e-38	-1.2646	TNS2		6.39657e-29	-1.32007	LPCAT3		9.95058e-29	-1.69778	CRTAC1		5.70333e-30	-1.6705
323	LRRC59		1.57037e-120	-0.769938	TTYH3		4.4337e-110	-0.39971	TEKT1		3.17148e-124	-0.062092	CBX4		3.71486e-38	-1.26123	KLF10		6.65475e-29	-1.3191	ABCG1		1.07032e-28	-1.69483	GPR89A		7.53301e-30	-1.66755
324	PSME2		1.59217e-120	-0.768055	NARF		4.58825e-110	-0.399379	NME4		1.19339e-123	-0.061627	LGALSL		3.93121e-38	-1.25719	HSD17B4		6.84423e-29	-1.31503	KAZN		1.12912e-28	-1.69406	HYAL2		8.07849e-30	-1.66637
325	NONO		2.94689e-120	-0.767577	LASP1	Prognostic genes	4.89937e-110	-0.396687	FAM216B		1.48351e-123	-0.0612026	XPO5		3.98865e-38	-1.2548	BZW2	Known disease genes	7.67616e-29	-1.31334	PLLP		1.294e-28	-1.69184	ICAM2		8.27081e-30	-1.66376
326	EIF3B		4.19264e-120	-0.760443	WFDC3		5.55604e-110	-0.396471	CD63		1.64498e-123	-0.0611266	MORC2		3.99836e-38	-1.25474	POLR2H		7.68901e-29	-1.31276	TNS2		1.35184e-28	-1.69039	MORC2		8.8438e-30	-1.6627
327	RPLP0		2.14977e-119	-0.759387	ITGA3		6.4362e-110	-0.396449	PSMA7		1.77419e-123	-0.0607653	GNAQ		4.15725e-38	-1.25399	AQP4	Known disease genes	7.98326e-29	-1.3119	EOGT		1.72502e-28	-1.69022	SLC50A1		1.02474e-29	-1.66233
328	C4orf48	Prognostic genes	2.18766e-119	-0.757308	BET1		6.66418e-110	-0.395979	MAL2		1.87522e-123	-0.0606835	SLC22A18AS		5.03879e-38	-1.25391	RCCD1	Prognostic genes	8.90249e-29	-1.31176	HSPD1		2.11062e-28	-1.68545	STOM		1.16572e-29	-1.66231
329	RPL26		3.15634e-119	-0.756948	LSM2		1.00882e-109	-0.395797	LDLRAD1		2.69131e-123	-0.0605269	PPM1D		5.45661e-38	-1.25357	KPNA2	Known disease genes / Prognostic genes	8.96973e-29	-1.31152	SPI1		2.39822e-28	-1.6814	KLF2		1.3099e-29	-1.66094
330	SERBP1		1.01379e-118	-0.755307	COX6B1		1.44439e-109	-0.395253	SPINT2		3.23662e-123	-0.0602961	MIS18A		6.64081e-38	-1.25291	P3H4		9.58416e-29	-1.30936	PLPP2		2.52821e-28	-1.68115	KPNA2	Known disease genes / Prognostic genes	1.38311e-29	-1.65732
331	PRDX4		1.19071e-118	-0.753525	CD24		1.45278e-109	-0.395143	ROPN1L	Prognostic genes	1.12755e-122	-0.0601087	PAPSS1		6.6473e-38	-1.25275	PIAS1		1.06731e-28	-1.30729	COLEC12		3.32482e-28	-1.67981	TFB2M		1.38802e-29	-1.65577
332	NT5E		1.20532e-118	-0.751874	LAPTM4B		1.59715e-109	-0.394859	CD36		1.31733e-122	-0.0599602	MCM6		6.70263e-38	-1.25065	GPR89A		1.10826e-28	-1.30703	TRAF4		3.80848e-28	-1.67587	BCL2L2		1.61408e-29	-1.65043
333	GNAS		1.38646e-118	-0.748955	LEMD1		1.85191e-109	-0.394106	CA2		1.55621e-122	-0.0598665	CDKN2A		8.84599e-38	-1.24919	NEBL		1.21907e-28	-1.30698	ZBTB4		4.0366e-28	-1.67527	FKBP11	Known disease genes	1.6598e-29	-1.65031
334	SELENBP1	Prognostic genes	3.01108e-118	-0.745048	ASPHD1		1.88892e-109	-0.394068	OSMR		2.21366e-122	-0.0598442	INPP5K		9.05242e-38	-1.24746	TSPYL1		1.30812e-28	-1.30578	PPAT		4.58379e-28	-1.67082	HEATR1		1.67953e-29	-1.64921
335	COX20		1.88529e-117	-0.744094	MESP1		2.10999e-109	-0.393619	PIFO	Prognostic genes	4.63661e-122	-0.0597391	CXCL14		9.51328e-38	-1.23977	TRIM27		1.42001e-28	-1.30431	DKC1		5.13433e-28	-1.65917	TSPYL1		1.76797e-29	-1.64806
336	CCT6A		1.89634e-117	-0.742568	NHP2		1.70667e-108	-0.392868	DPP4		1.71673e-121	-0.0596689	TOM1L2		1.03761e-37	-1.23911	PROM2		1.42904e-28	-1.30387	INTS8		5.4864e-28	-1.65905	POLR2H		1.86238e-29	-1.64678
337	NR2F6		1.92809e-117	-0.740772	LGR4		2.25559e-108	-0.391194	TMEM190		2.74581e-121	-0.0595855	ATAT1		1.30925e-37	-1.2365	MCOLN1		1.4988e-28	-1.30297	TRIM27		6.3064e-28	-1.65184	PUS7		2.29868e-29	-1.64371
338	IFNGR2		3.72265e-117	-0.740268	RSPH4A		3.04844e-108	-0.390392	C11orf97		2.9636e-121	-0.0595453	SLC5A6		1.80173e-37	-1.23377	CALM1		1.56173e-28	-1.30014	STOM		7.66323e-28	-1.65183	CENPL		2.3352e-29	-1.6332
339	RPS28		3.88899e-117	-0.739106	TNFRSF12A		7.34077e-108	-0.390334	JTB		3.96632e-121	-0.0595316	SYNC		1.86108e-37	-1.23248	GMPPA		1.62611e-28	-1.29593	HMGA1		7.69203e-28	-1.65074	GCNT3		2.38828e-29	-1.62932
340	PEBP4		9.94978e-117	-0.738812	ARPC1B		1.28769e-107	-0.389904	RPL41		4.17261e-121	-0.0588541	IRAK1	Known disease genes	1.86361e-37	-1.23138	USP12		1.81042e-28	-1.29572	C11orf96		8.48104e-28	-1.65052	TNS2		3.16873e-29	-1.62931
341	SNRPG	Known disease genes	1.04453e-116	-0.738712	PKM	Prognostic genes	6.47773e-107	-0.389425	PFDN2		1.85624e-120	-0.0588351	CNFN		2.93394e-37	-1.22911	SHROOM4		1.90924e-28	-1.29257	PAK1	Prognostic genes	8.58002e-28	-1.64633	TRIM27		3.33071e-29	-1.6248
342	IFI44		1.53653e-116	-0.737289	C6orf118		2.06773e-106	-0.389198	MGLL		4.10503e-120	-0.0588236	RBMS2		2.97543e-37	-1.22904	TIMM8A		2.04902e-28	-1.28903	MYRF		9.5984e-28	-1.64011	CENPK	Prognostic genes	3.3909e-29	-1.62257
343	CSNK2B		3.00408e-116	-0.734811	CCND1		2.21482e-106	-0.388774	WDR38		7.1452e-120	-0.0587367	KLF13		3.31283e-37	-1.22807	GJB2		2.0675e-28	-1.28768	MCM4		1.11328e-27	-1.63999	USP12		4.19406e-29	-1.62214
344	RER1		3.08643e-116	-0.734699	OSBPL6		7.73752e-106	-0.387823	PAG1		1.93633e-119	-0.0586485	NUP155		3.69591e-37	-1.22751	MRPL3		2.10515e-28	-1.28514	IL20RA		1.20636e-27	-1.63583	CYP27A1		4.44304e-29	-1.62213
345	AHR	Known disease genes	3.40055e-116	-0.734229	SIPA1		1.53277e-105	-0.387419	CCT6A		2.85804e-119	-0.0582296	FAM71A		4.27659e-37	-1.22553	TFAP2A		2.16617e-28	-1.28171	SLC44A2		1.24269e-27	-1.6353	SORBS1		4.67864e-29	-1.62047
346	MFSD2A		5.43256e-116	-0.731779	SHISA3		1.87376e-105	-0.386659	PDCD6		3.76509e-119	-0.058166	NAT9		4.63238e-37	-1.22268	INPP5A		2.54125e-28	-1.27936	LST1		1.24269e-27	-1.63464	DBNDD1		4.74176e-29	-1.62042
347	EDF1		6.22135e-116	-0.730532	NPM3	Known disease genes	8.99532e-105	-0.386335	PHLDA3		4.90485e-119	-0.0578974	NUP85		4.77944e-37	-1.22204	SLC50A1		2.72292e-28	-1.27774	WDR75		1.39018e-27	-1.62754	SLC44A2		4.94369e-29	-1.61886
348	TUBA4A		6.84005e-116	-0.72731	CIRBP	Prognostic genes	9.97972e-105	-0.385165	RGS10		5.72686e-119	-0.0578162	RPL39L		5.81731e-37	-1.22063	TFB2M		3.00737e-28	-1.27769	NME1		1.40487e-27	-1.62609	MTIF2		5.01523e-29	-1.61546
349	TUBA1A		1.23572e-115	-0.725582	RPS9		1.07579e-104	-0.38501	CCND1		3.23159e-118	-0.0575572	ACADL		7.04914e-37	-1.22022	PUS7		3.13846e-28	-1.27752	ARHGEF37		1.52255e-27	-1.62485	SERPING1		5.07557e-29	-1.61291
350	LPP		2.433e-115	-0.725495	FGFR2	Known disease genes	1.14791e-104	-0.384805	FMO2		4.60754e-118	-0.0574151	COL17A1		7.78172e-37	-1.21841	SLC39A11	Prognostic genes	3.25064e-28	-1.27616	RRAS		1.60807e-27	-1.6213	PDK1		6.75336e-29	-1.61067
351	MRPL12	Known disease genes	3.0401e-115	-0.722799	SLFN5		3.15448e-104	-0.383228	CRTAC1		5.24375e-118	-0.0571494	RFWD3		8.60804e-37	-1.21385	MORC2		4.0901e-28	-1.27436	PAPSS2		1.63195e-27	-1.6183	TYMS	Known disease genes	7.01667e-29	-1.60597
352	C9orf16		5.34033e-115	-0.722085	RPL15		6.60735e-104	-0.380589	PYCR1		5.99338e-118	-0.0568515	ACP5		9.0683e-37	-1.21016	HSD17B6		4.25652e-28	-1.27419	CTDSPL		1.67013e-27	-1.61827	KAT2B		7.51176e-29	-1.6028
353	FLNA		5.35997e-115	-0.72175	MUC3A		7.79936e-104	-0.380476	CFAP53		9.88824e-118	-0.0568319	NVL		9.07845e-37	-1.20484	PLEKHA8		4.75636e-28	-1.27378	E2F3		1.77239e-27	-1.61428	ZBTB4		7.59791e-29	-1.60205
354	PRSS12		5.96491e-115	-0.719769	GADD45B		1.20315e-103	-0.379962	PSMD8		1.02288e-117	-0.0567437	OVOL1		9.44962e-37	-1.20467	MANF		5.24223e-28	-1.27346	SPP1	Prognostic genes	1.92224e-27	-1.6123	PTPRM		8.12418e-29	-1.60178
355	NAA10	Known disease genes	2.85144e-114	-0.718178	TMEM147		1.32308e-103	-0.379574	LAD1		1.07072e-117	-0.056722	LATS2	Known disease genes	9.82159e-37	-1.202	FBLN5		6.45201e-28	-1.27267	MSTO1		2.00199e-27	-1.6111	ANKRD29		8.22814e-29	-1.59976
356	SURF4		2.86445e-114	-0.717267	MIF		1.71807e-103	-0.377368	CD52		1.15349e-117	-0.0566792	IPO4	Known disease genes	1.11859e-36	-1.19739	UTRN		8.38873e-28	-1.26923	SH3BGRL		2.12849e-27	-1.60846	LPL		8.22814e-29	-1.59625
357	ABCA3		4.84646e-114	-0.715138	SEMA4B		3.09382e-103	-0.376799	MAP3K13		1.82158e-117	-0.0565582	ZNF106		1.1208e-36	-1.19609	FANCF		8.51326e-28	-1.26628	MSI2		2.17877e-27	-1.60377	XPO5		8.69861e-29	-1.59518
358	PRRC2C		1.83308e-113	-0.71431	MCEMP1		3.98139e-103	-0.376735	CFAP73		6.84007e-117	-0.0564707	PYGO2		1.19582e-36	-1.19594	HEATR1		9.12012e-28	-1.26159	DNAJC18		2.27247e-27	-1.60296	GNG11	Known disease genes	1.00803e-28	-1.59393
359	ALDH1A1		2.08455e-113	-0.713634	SERPINF1		5.90805e-103	-0.376666	ECE1		7.21573e-117	-0.0563787	ZNF138		1.38552e-36	-1.19375	ABCC3		1.07955e-27	-1.25897	GFPT1		2.35177e-27	-1.60095	CBX3		1.06017e-28	-1.59317
360	QSOX1		4.6097e-113	-0.712636	SBNO2		1.47066e-102	-0.376568	KLK11		9.61502e-117	-0.0562722	C15orf48	Prognostic genes	1.5094e-36	-1.19216	LMNB1	Known disease genes	1.29268e-27	-1.25757	SPTBN2		2.66315e-27	-1.6008	BCL9		1.11836e-28	-1.58847
361	SSBP1		9.84385e-113	-0.712264	MPZL2		1.97014e-102	-0.37103	GNAS		1.35615e-116	-0.0558797	SLC52A2		1.74543e-36	-1.19117	TARS2		1.31359e-27	-1.25712	KDELR2		2.73432e-27	-1.60046	PRICKLE2		1.13632e-28	-1.5872
362	BCL7C		3.51226e-112	-0.708486	IGFBP3		2.5258e-102	-0.368726	S100A9		1.4203e-116	-0.0558551	PRR36		1.85977e-36	-1.18976	ARRB2		1.42709e-27	-1.25549	VMP1		2.82566e-27	-1.5995	SLC39A11	Prognostic genes	1.19139e-28	-1.5871
363	SLC50A1		4.48086e-112	-0.706348	HES1		3.79171e-102	-0.368725	POLR2J		1.50483e-116	-0.0558272	RASGEF1B		2.86892e-36	-1.18847	CENPL		1.45091e-27	-1.25512	BMP2		2.89486e-27	-1.59762	TMEM69		1.30348e-28	-1.58619
364	ACBD3		9.78371e-112	-0.705665	ADAM8		4.26376e-102	-0.366919	JUND		2.3024e-116	-0.0558214	DUS1L		3.09594e-36	-1.18655	SMAD7		1.48413e-27	-1.25505	TUBB6		3.22607e-27	-1.59754	SLC5A6		1.32848e-28	-1.58458
365	PTTG1IP	Prognostic genes	1.67014e-111	-0.705351	RPL3		4.63385e-102	-0.363971	SNRPG	Known disease genes	3.32565e-116	-0.0557248	BRIX1		3.56778e-36	-1.18641	KLF2		1.51223e-27	-1.24884	SAP30L		3.32583e-27	-1.58758	NDRG2		1.41736e-28	-1.58096
366	TPM3		1.71207e-111	-0.704275	BCL7C		4.72412e-102	-0.363665	RSPH9		4.66071e-116	-0.0555563	CTNNAL1		3.9787e-36	-1.18443	TTC28		1.66711e-27	-1.24536	UTRN		3.79323e-27	-1.5862	TARS2		1.51999e-28	-1.57697
367	LAPTM4B		2.35595e-111	-0.704022	FBL	Known disease genes	5.35301e-102	-0.363242	ODF3B		2.10697e-115	-0.0554678	MARCO		4.56317e-36	-1.18369	TNS3		1.68434e-27	-1.24102	EFCAB1		3.83087e-27	-1.5816	AVL9		1.52657e-28	-1.57472
368	GPX3		3.04951e-111	-0.703358	TXN		1.28185e-101	-0.362893	CLDN3		2.1348e-115	-0.0554241	C20orf194		5.26124e-36	-1.18309	SLC15A3		1.71944e-27	-1.24068	PHLDB2		3.91459e-27	-1.58024	NEDD9		1.8057e-28	-1.56855
369	DAP		5.062e-111	-0.703107	CAMK2N1		1.39896e-101	-0.362476	DNTTIP1	Prognostic genes	2.65477e-115	-0.0552804	EPHB2		5.94219e-36	-1.17929	PDK1		1.72049e-27	-1.24012	MFSD2A		4.06914e-27	-1.57721	EFEMP1		1.8399e-28	-1.55864
370	KRT8		1.23889e-110	-0.702077	CXCL14		1.73372e-101	-0.362335	CCDC146		3.18697e-115	-0.0549394	CDH3	Prognostic genes	6.14849e-36	-1.17873	KAT2B		2.10439e-27	-1.23522	B3GNT2		5.11019e-27	-1.57104	MANF		1.84194e-28	-1.55806
371	RAI14		1.85292e-110	-0.70053	SYNGR2		7.00967e-101	-0.362262	FSCN1		9.64181e-115	-0.054896	KIF22		6.58074e-36	-1.17781	AVL9		2.1726e-27	-1.23444	LDHA	Known disease genes	5.34082e-27	-1.57053	BPHL		2.18223e-28	-1.55796
372	TMED3		7.80239e-110	-0.697888	PABPC1		1.17715e-100	-0.362212	SPATS2L	Prognostic genes	1.1073e-114	-0.0547145	HLA-E		6.67185e-36	-1.17627	MSI2		2.22071e-27	-1.22911	GGCT		6.28046e-27	-1.56841	CRY2		2.50552e-28	-1.55762
373	DPYSL3		1.18376e-109	-0.6969	TNFSF10	Known disease genes	1.18731e-99	-0.362167	TM4SF4		1.43402e-114	-0.0545378	GNPNAT1	Known disease genes	7.30149e-36	-1.1748	CBX3		2.22215e-27	-1.22594	EIF4E3		6.42866e-27	-1.56626	UTRN		2.65411e-28	-1.55594
374	CCZ1		8.25229e-109	-0.696042	TMEM167A		2.22099e-99	-0.360773	DAP		2.11646e-114	-0.0545305	KLF4		7.55116e-36	-1.1693	RUSC1		2.35894e-27	-1.22498	RPGR		6.46649e-27	-1.56553	GALNT18		2.7514e-28	-1.55559
375	ANP32B		9.96545e-109	-0.694984	HYDIN		4.16678e-99	-0.3598	LGALS9		9.09505e-114	-0.054331	MTIF2		7.60616e-36	-1.16816	UBL3		2.43388e-27	-1.22333	PKIG		6.55882e-27	-1.56166	PAPSS2		2.85186e-28	-1.55209
376	ETV5		1.25861e-108	-0.692234	NEK5		7.87146e-99	-0.358631	EMB		1.75672e-113	-0.0541671	DBF4		8.50777e-36	-1.16673	PTPRM		2.50046e-27	-1.21986	CRIM1		7.85087e-27	-1.56083	MMP1		3.1014e-28	-1.54809
377	IER3		1.34729e-108	-0.69221	ENKUR		9.00084e-99	-0.356525	PLAC8		2.60127e-113	-0.0541006	ESRP1		9.47026e-36	-1.16479	GATA6		2.79262e-27	-1.21831	LPXN		7.96334e-27	-1.55569	COL1A1		3.6741e-28	-1.5459
378	MRPS21		1.95918e-108	-0.688571	TMED3		9.53434e-99	-0.355339	PSME2		2.60127e-113	-0.0539881	COG2		1.03068e-35	-1.16409	N4BP2L1		2.88269e-27	-1.21629	APOL3		8.10668e-27	-1.55521	ACP6		3.75143e-28	-1.54589
379	LAMP3		8.03944e-108	-0.688397	TYROBP		1.31347e-98	-0.354648	NEDD8		4.90666e-113	-0.0539182	TMEM69		1.12361e-35	-1.1595	PGM2L1		3.08172e-27	-1.21553	CYP4B1		9.07278e-27	-1.5533	LMO7		4.33878e-28	-1.54481
380	RAB25		9.98514e-108	-0.686703	TSPAN5		2.5988e-98	-0.353928	DPYSL3		5.41653e-113	-0.053899	UQCC2		1.18671e-35	-1.15579	PTTG1		3.29593e-27	-1.21205	ARRB1	Prognostic genes	9.87023e-27	-1.55238	RFC4	Known disease genes	4.55626e-28	-1.54311
381	C12orf75		1.07525e-107	-0.685692	KCNK6	Prognostic genes	2.70145e-98	-0.353471	ENY2		8.66135e-113	-0.0538939	VMP1		1.39107e-35	-1.15459	CRY2		3.45545e-27	-1.21057	NPNT		1.00324e-26	-1.54981	SLC12A4		4.65855e-28	-1.5402
382	PSMB8		1.58449e-107	-0.685291	MGLL		4.57467e-98	-0.35142	LASP1	Prognostic genes	3.89102e-112	-0.0538624	SOX11		1.40506e-35	-1.15204	CENPK	Prognostic genes	4.27866e-27	-1.209	LGR4		1.0892e-26	-1.54971	LIMCH1		4.88796e-28	-1.53959
383	CCM2		1.62715e-107	-0.684889	PIP5K1B		5.16089e-98	-0.351259	ID4		7.82133e-112	-0.0537542	WDR12		1.44886e-35	-1.14863	SH3BP5		5.58943e-27	-1.20733	SMAD7		1.1552e-26	-1.54781	SH3BGRL		5.89473e-28	-1.53881
384	CCDC146		7.14058e-107	-0.684201	AK2		5.62884e-98	-0.350927	PMEPA1		2.1447e-111	-0.0537007	LDHA	Known disease genes	1.63581e-35	-1.14759	BCL9		5.6622e-27	-1.20599	ARMCX1		1.2293e-26	-1.54715	HMGA1		7.81554e-28	-1.53043
385	ZMYND10		1.32988e-106	-0.68346	RPL9		6.68067e-98	-0.350804	APOC1		2.33372e-111	-0.0536547	SLC25A39		1.77671e-35	-1.14658	FKBP11	Known disease genes	5.69333e-27	-1.20502	DCAF13		1.27154e-26	-1.54425	KRT80		8.76568e-28	-1.53037
386	DUSP6		1.54029e-106	-0.68247	FAM162A		1.10261e-97	-0.348925	NPEPPS		6.8109e-111	-0.0535864	MYL9		1.98039e-35	-1.1464	FEN1		6.24098e-27	-1.20467	SERPING1		1.34837e-26	-1.54348	NVL		9.91883e-28	-1.53011
387	RAB13		2.89528e-106	-0.680931	B2M		1.18043e-97	-0.348673	ANP32B		7.65165e-111	-0.0535634	KDELR2		2.29057e-35	-1.14593	XPO5		6.48506e-27	-1.20336	EFEMP1		1.36396e-26	-1.54176	TNS3		1.02987e-27	-1.5252
388	TRAM1		3.10879e-106	-0.68087	AGER		1.2888e-97	-0.348414	CYBA		1.22109e-110	-0.0534147	DOCK4		2.48787e-35	-1.14571	ATP10B		6.58675e-27	-1.20268	SAMHD1		1.65317e-26	-1.53403	FRMD4B		1.03936e-27	-1.525
389	PPP1R14C		5.76322e-106	-0.678527	PEBP1		1.57242e-97	-0.347832	TNFRSF12A		1.64212e-110	-0.0533924	GORASP2		2.50506e-35	-1.14457	NUP85		6.98498e-27	-1.20239	SNX25		1.67051e-26	-1.53391	APBB1		1.04734e-27	-1.52395
390	PARK7	Prognostic genes	1.37756e-105	-0.678165	LRRIQ1		1.97044e-97	-0.34778	AQP4	Known disease genes	2.45231e-110	-0.0532178	GPX3		2.56766e-35	-1.14409	MTIF2		7.24197e-27	-1.19831	TEKT1		1.71453e-26	-1.5317	SAMHD1		1.24504e-27	-1.52005
391	HLA-B		2.03694e-105	-0.677624	TAF10		1.99281e-97	-0.34723	LRRC46		3.01742e-110	-0.0530178	PTRH2		3.04858e-35	-1.14161	RNF13		7.38362e-27	-1.19725	TNS3		1.79827e-26	-1.53091	CRIM1		1.32985e-27	-1.51895
392	PTPN12		2.53565e-105	-0.676975	TEKT2		3.88283e-97	-0.346284	UBE2I		3.04128e-110	-0.052939	RMDN3		3.06656e-35	-1.14049	MYO1B		7.38362e-27	-1.1959	NEDD9		1.80715e-26	-1.53003	RASGRF1		1.46622e-27	-1.5176
393	CAMTA1		2.82023e-105	-0.67449	NT5E		1.0608e-96	-0.345223	DRC3		4.58201e-110	-0.0525916	CLK2		3.20854e-35	-1.13855	KCTD12		8.15003e-27	-1.19387	TRAP1		1.81683e-26	-1.52429	NUP85		1.54663e-27	-1.51696
394	SLC25A37		6.07e-105	-0.672633	ASS1		1.24442e-96	-0.343962	CDHR3		5.80787e-110	-0.0524388	SEC22C		3.52772e-35	-1.13738	APBB1		8.60453e-27	-1.19053	FOSB		1.99233e-26	-1.52408	SMYD5		1.64275e-27	-1.51332
395	BZW1		1.37317e-104	-0.671763	RPL22		1.982e-96	-0.343304	PTP4A2	Prognostic genes	6.32139e-110	-0.0522656	PIAS3		3.82188e-35	-1.13571	BCL2L15		9.3854e-27	-1.18938	STX2		1.99233e-26	-1.52304	NPNT		2.14793e-27	-1.50954
396	SH3BGRL3		1.8602e-104	-0.671679	CDC25B		2.58704e-96	-0.342293	AHR	Known disease genes	6.89097e-110	-0.0516916	SNRPE		4.02483e-35	-1.13471	SORBS3		9.71763e-27	-1.18904	ABHD5		1.99345e-26	-1.52285	EGR2		2.26416e-27	-1.50949
397	PHB		5.96787e-104	-0.668662	DHCR24		8.35989e-96	-0.342255	ZDHHC9		8.8722e-110	-0.0515585	ARL13B		4.18794e-35	-1.13445	NDRG2		9.8166e-27	-1.18294	ZCCHC24		2.02291e-26	-1.51957	N4BP2L1		2.49717e-27	-1.50864
398	RGS10		6.8949e-104	-0.668221	TMC6		1.46215e-95	-0.342081	RNF213		1.07588e-109	-0.0513997	LGI3		4.52768e-35	-1.13428	NVL		1.00756e-26	-1.18199	GORASP2		2.43107e-26	-1.51723	TNFSF12		3.38039e-27	-1.50759
399	NDUFA2		1.08883e-103	-0.667331	DRC1	Prognostic genes	2.14155e-95	-0.34195	GSTA1	Prognostic genes	1.30278e-109	-0.051371	SLC7A11		4.84802e-35	-1.13202	STK39	Known disease genes	1.07588e-26	-1.18175	AVL9		2.54141e-26	-1.51675	NOL10		3.51025e-27	-1.50359
400	RPL5		1.31659e-103	-0.665676	TKT		3.69394e-95	-0.341735	TMED3		2.44589e-109	-0.0512531	SYT15		5.36577e-35	-1.12641	ZFP36		1.14838e-26	-1.18121	SACM1L		2.84345e-26	-1.51554	KCTD12		4.29862e-27	-1.50244
401	CTNNB1	Known disease genes	1.96936e-103	-0.663622	NR2F6		5.83208e-95	-0.3393	GLS		2.58705e-108	-0.0511733	NSF		6.8381e-35	-1.1216	FABP5		1.32703e-26	-1.17936	LMO7		3.21314e-26	-1.51473	SERINC2		4.33468e-27	-1.50193
402	PHF14		2.221e-103	-0.663237	SLC22A31		5.97477e-95	-0.337608	RAB13		2.58705e-108	-0.0511427	GART	Known disease genes	7.01455e-35	-1.12131	CD68		1.35698e-26	-1.1787	AK1		3.43498e-26	-1.51218	NSF		4.34896e-27	-1.49915
403	FNDC3B		2.30608e-103	-0.662767	FCER1G		6.0994e-95	-0.337464	PDCD5		3.47874e-108	-0.0510994	SHMT2		9.05566e-35	-1.12103	BPHL		1.37366e-26	-1.17584	SLC50A1		3.96959e-26	-1.50699	PTRH2		4.43411e-27	-1.49816
404	SERF2		2.54253e-103	-0.66231	PRSS23		6.96737e-95	-0.336953	FAM166B		3.56933e-108	-0.0510816	CHPF2		9.7528e-35	-1.11971	RFWD3		1.46655e-26	-1.1753	RASSF8		4.05975e-26	-1.50648	INPP5A		4.47264e-27	-1.49627
405	MRPL55		2.97976e-103	-0.661908	CMTM3		7.87655e-95	-0.336023	ERRFI1		4.08208e-108	-0.0507539	PRKCH		9.76203e-35	-1.11804	CBX4		1.48475e-26	-1.17523	APH1B		4.67661e-26	-1.50545	GMPPA		4.48932e-27	-1.49556
406	PARP14		3.13299e-103	-0.661599	PLSCR1	Prognostic genes	9.64916e-95	-0.335267	NARF		5.14139e-108	-0.0503987	R3HDM1		1.07143e-34	-1.117	PYGO2		1.67464e-26	-1.17009	SLC15A3		4.74091e-26	-1.4988	PTTG1		5.96416e-27	-1.49542
407	SNRPB		3.88153e-103	-0.660409	SGPP2		9.9695e-95	-0.334954	FAM162A		1.48058e-107	-0.0503455	SNX1	Prognostic genes	1.12677e-34	-1.11661	COG2		1.80477e-26	-1.16964	EZH2		5.12664e-26	-1.49865	ID4		6.07453e-27	-1.49406
408	MBOAT2		4.29798e-103	-0.660281	FSCN1		2.86254e-94	-0.334265	MRPS21		2.09882e-107	-0.0500998	TMTC4		1.18882e-34	-1.11497	ATAD2		1.90967e-26	-1.16875	PPFIBP1		5.64765e-26	-1.49346	PITX1		6.24582e-27	-1.49178
409	DUSP23		4.75504e-103	-0.659799	DPYSL3		4.3779e-94	-0.33394	CCDC17		2.65173e-107	-0.0500354	NOL10		1.21479e-34	-1.11251	ABCG1		2.11484e-26	-1.16781	LONRF1		5.97985e-26	-1.49326	RUSC1		6.36436e-27	-1.49136
410	CKLF		8.76127e-103	-0.659348	SERPING1		4.61527e-94	-0.331661	C9orf116		3.07959e-107	-0.0498897	TBRG4		1.21677e-34	-1.11139	FRMD4B		2.13432e-26	-1.16535	LIMCH1		6.19154e-26	-1.49229	SLC7A5		6.49187e-27	-1.48632
411	YKT6		1.13873e-102	-0.658906	PPP1R1B		5.29207e-94	-0.331553	HHIP		3.08989e-107	-0.0498707	MRGBP		1.36831e-34	-1.1104	SLC5A6		2.16558e-26	-1.16444	MORC2		7.14084e-26	-1.49208	PDCD2L		6.69153e-27	-1.48626
412	TKT		1.77065e-102	-0.656821	KDELR3		5.72915e-94	-0.33137	NONO		3.26075e-107	-0.0498665	DUS4L		1.73937e-34	-1.10715	B4GALT2		2.25701e-26	-1.16328	ETF1		8.2788e-26	-1.49107	ATAD2		6.7061e-27	-1.48374
413	TAF10		3.99054e-102	-0.654438	NBL1		6.04642e-94	-0.331353	TUBA4B		3.33098e-107	-0.0495069	DLC1		2.38322e-34	-1.10286	AFF3		2.33341e-26	-1.16244	CCDC173		8.37584e-26	-1.49079	TRIP13		6.75351e-27	-1.47883
414	NDUFB11		4.00247e-102	-0.652617	TMEM159		6.7805e-94	-0.331169	MUC21		3.56333e-107	-0.0493493	DECR2		2.39002e-34	-1.10182	ETF1		2.41913e-26	-1.16113	SERINC2		9.07341e-26	-1.48987	COG2		7.1088e-27	-1.47802
415	UBXN1		8.32022e-102	-0.651884	GADD45A		1.38874e-93	-0.330565	RPL14		4.02594e-107	-0.0491578	EPHX3		2.49593e-34	-1.10163	RFC4	Known disease genes	2.49497e-26	-1.1593	NEK7		9.20769e-26	-1.48479	SHROOM4		7.84119e-27	-1.47453
416	AK2		8.42177e-102	-0.651473	DUSP5		3.69118e-93	-0.328692	CCNI		4.8528e-107	-0.0489985	FLVCR1		3.16764e-34	-1.10071	SPP1	Prognostic genes	2.67484e-26	-1.15509	LIMD1		9.28218e-26	-1.48468	VIM		8.37636e-27	-1.47366
417	RBM8A		1.09519e-101	-0.650599	STK39	Known disease genes	4.19126e-93	-0.328555	PRDX4		8.33588e-107	-0.0489435	SRD5A1		3.27584e-34	-1.09933	BORCS7		2.82029e-26	-1.15444	FLAD1		1.00143e-25	-1.47956	CTDSPL		8.68901e-27	-1.46643
418	PSMB4		4.25781e-101	-0.649816	RPS3A		1.4751e-92	-0.326665	DNAH12		8.76718e-107	-0.0488897	ALOX5	Known disease genes	3.71448e-34	-1.09925	MYO1C		2.95027e-26	-1.15312	GAPDH	Known disease genes / Prognostic genes	1.02356e-25	-1.47768	PDLIM1		8.98208e-27	-1.46461
419	SLIRP		7.04432e-101	-0.648725	C9orf16		4.02993e-92	-0.325208	PRELID1		8.79896e-107	-0.0487916	SPTB		3.72133e-34	-1.09822	TPBG		2.99139e-26	-1.15107	PDLIM1		1.05698e-25	-1.47564	JUND		9.2042e-27	-1.46413
420	GADD45B		1.32097e-100	-0.648211	CAPN12		2.65318e-91	-0.324312	SERF2		1.09026e-106	-0.048782	MTX2		3.76133e-34	-1.09773	GFPT1		3.26964e-26	-1.15018	GALNT7		1.10131e-25	-1.47477	WDR12		9.41522e-27	-1.46204
421	ADAR		1.76954e-100	-0.646206	RGCC		3.0045e-91	-0.323046	RBM8A		1.12014e-106	-0.0487183	TXNDC17		4.19946e-34	-1.09657	LPXN		4.13122e-26	-1.15006	RNF13		1.14226e-25	-1.47451	ABCG1		9.87609e-27	-1.46188
422	MICALL2		1.79904e-100	-0.645945	CCDC146		7.70098e-91	-0.322304	SERBP1		2.50664e-106	-0.0486367	FUT8		4.21137e-34	-1.09494	GORASP2		4.13956e-26	-1.14744	ARRB2		1.17673e-25	-1.47441	CYP4B1		1.03674e-26	-1.46156
423	ITGAV		2.34682e-100	-0.644439	DUS1L		1.43242e-90	-0.320667	CSNK2B		3.87553e-106	-0.0484312	SRPX2		4.4555e-34	-1.09225	ANO6		4.28349e-26	-1.1466	ARRDC4		1.20646e-25	-1.47368	CBX4		1.04774e-26	-1.46109
424	PSMB2		2.92806e-100	-0.643362	CCM2		1.54993e-90	-0.320187	EDF1		4.51795e-106	-0.0482998	SLFN13		4.55256e-34	-1.09	NOL10		4.34739e-26	-1.1464	KCTD12		1.37756e-25	-1.47353	MCM2		1.1914e-26	-1.46039
425	BLVRA		3.27834e-100	-0.642304	SLC2A1	Prognostic genes	2.08043e-90	-0.319714	TMEM123		6.45812e-106	-0.048294	TOX3		4.83942e-34	-1.08993	CRIM1		4.54281e-26	-1.14378	TMEM184A		1.41022e-25	-1.46479	GART	Known disease genes	1.23744e-26	-1.46027
426	SNU13		4.79148e-100	-0.642134	MGST3		5.09225e-90	-0.319088	IFI16		1.55264e-105	-0.0474564	DAP3		4.84297e-34	-1.08933	MCM2		5.602e-26	-1.14343	EFNA4		1.56995e-25	-1.46141	TSPAN7		1.39874e-26	-1.45914
427	UQCRB		6.15096e-100	-0.641285	GPX3		5.29205e-90	-0.319088	BCL7C		1.60419e-105	-0.0470873	ASNS		4.85488e-34	-1.08858	TYMS	Known disease genes	5.602e-26	-1.14301	PMP22		1.6829e-25	-1.46127	RFWD3		1.40239e-26	-1.45905
428	ARHGDIB		7.79768e-100	-0.638269	SLC50A1		1.45403e-89	-0.318225	FAM89B		2.68972e-105	-0.0470499	DIXDC1		4.98886e-34	-1.08795	PODXL2		5.67286e-26	-1.14275	DAP3		2.00678e-25	-1.45959	PROM2		1.5915e-26	-1.45524
429	NSA2		9.76868e-100	-0.637331	SPP1	Prognostic genes	1.51515e-89	-0.318151	ZNF593		3.14588e-105	-0.046843	RHNO1		5.49146e-34	-1.08696	IRAK1	Known disease genes	5.74372e-26	-1.14236	CSTA		2.25556e-25	-1.45881	SLC27A3		1.62756e-26	-1.45237
430	SLC16A9		2.25089e-99	-0.63671	RAI14		1.68489e-89	-0.317955	C1orf122		3.80804e-105	-0.0466573	HGD		5.49378e-34	-1.08274	SAP30L		5.7468e-26	-1.14138	VSIG2		2.31784e-25	-1.4563	SOCS2		1.87369e-26	-1.4508
431	PPP4C	Prognostic genes	7.63335e-99	-0.634593	PTPRE		2.07598e-89	-0.315138	TPM3		4.39314e-105	-0.046399	DPYSL2		5.49608e-34	-1.07814	ACP6		5.81168e-26	-1.1413	MCOLN1		2.33202e-25	-1.45544	GFPT1		1.95001e-26	-1.45058
432	GADD45GIP1		7.91755e-99	-0.634008	CALD1		2.47064e-89	-0.315097	GOLM1	Known disease genes	4.73861e-105	-0.0463927	MICALL2		5.75717e-34	-1.07582	NAT9		6.0155e-26	-1.13467	MYO1B		2.64692e-25	-1.45463	ACOXL		1.98519e-26	-1.45045
433	ID1		8.53318e-99	-0.633657	SERPINH1		2.59251e-89	-0.314979	GADD45A		2.57292e-104	-0.046349	CLDN10		8.25248e-34	-1.07459	PMP22		6.2012e-26	-1.13467	SORBS3		2.84832e-25	-1.45406	TPBG		1.98519e-26	-1.45044
434	TMEM106B		2.28305e-98	-0.631194	EIF3K		3.21629e-89	-0.314829	ACTN4	Prognostic genes	6.28729e-104	-0.0461574	AHNAK		8.34775e-34	-1.07451	SOCS2		6.99732e-26	-1.13399	JUND		3.07436e-25	-1.45159	BORCS7		2.14988e-26	-1.44863
435	RAD23B		2.69111e-98	-0.630598	TRAF4		4.47869e-89	-0.314495	CATSPERD		8.50151e-104	-0.0461163	VAMP2		8.56297e-34	-1.07415	ARHGAP44		7.39618e-26	-1.13063	TPPP		3.19039e-25	-1.45115	RBMS3		2.32549e-26	-1.448
436	TMEM50A	Prognostic genes	3.72877e-98	-0.629929	LAMTOR2		4.48881e-89	-0.314071	SMIM22		1.11323e-103	-0.0461041	KRT16		8.84005e-34	-1.07389	SPTAN1		8.35535e-26	-1.12986	MANF		3.2373e-25	-1.44967	ARRB1	Prognostic genes	2.4266e-26	-1.44794
437	TCEA3		4.27478e-98	-0.628825	NDUFS5		1.07304e-88	-0.313926	RALA	Prognostic genes	1.17834e-103	-0.0460312	TESC		9.33336e-34	-1.07322	HSPD1		8.97753e-26	-1.12533	SBDS		3.51583e-25	-1.44828	HSPD1		2.51047e-26	-1.44383
438	CCNL2		4.79224e-98	-0.627115	NOVA1		3.10749e-88	-0.313444	TRIP6		1.39176e-103	-0.0459981	CALCOCO1		9.93196e-34	-1.0727	ARID5A		9.22646e-26	-1.12432	SDCBP		3.674e-25	-1.44526	MIS18A		2.57189e-26	-1.44156
439	CTSC		9.45425e-98	-0.627099	NEK6		1.21483e-87	-0.312516	CLTC		1.55504e-103	-0.0456892	ZNF217		1.01398e-33	-1.07268	PDCD2L		9.5727e-26	-1.12331	SCARF1		3.86291e-25	-1.44401	MS4A15		2.67326e-26	-1.43555
440	NME4		1.05572e-97	-0.626236	CX3CL1		1.305e-87	-0.312022	FGFR2	Known disease genes	2.30523e-103	-0.0455267	HSPE1		1.07621e-33	-1.07133	TMEM69		1.05832e-25	-1.12189	NEBL		4.10805e-25	-1.44175	IPO4	Known disease genes	2.88448e-26	-1.43409
441	IFI27L2		2.02813e-97	-0.625432	CPE		1.36109e-87	-0.312014	IL20RA		5.69333e-103	-0.0455178	GAS6		1.11424e-33	-1.06758	HSH2D	Prognostic genes	1.14048e-25	-1.12147	CDADC1		4.31381e-25	-1.44097	PSMG3		2.9365e-26	-1.43308
442	SUPT4H1		2.04524e-97	-0.625351	MRPL12	Known disease genes	1.74826e-87	-0.310988	SERPINF1		6.8322e-103	-0.0454025	SEMA4B		1.18522e-33	-1.06692	TIMP3		1.28462e-25	-1.12001	NFIX		5.29415e-25	-1.43956	UQCC2		3.13585e-26	-1.42754
443	MPG		3.90533e-97	-0.625344	EIF1		4.78712e-87	-0.310375	MYO6		7.24359e-103	-0.0453147	ABHD11		1.21525e-33	-1.06494	ABHD5		1.29593e-25	-1.1194	ANO6		6.72735e-25	-1.43894	SH3BP5		3.25067e-26	-1.42636
444	LAGE3		6.21343e-97	-0.62254	TRIM47		9.8091e-87	-0.310071	CFAP43		1.20986e-102	-0.0451922	NCF2		1.23793e-33	-1.06148	HMGA1		1.30161e-25	-1.11901	OSTM1		7.19691e-25	-1.43717	FEN1		3.30045e-26	-1.42514
445	EIF3I		6.98078e-97	-0.621455	IL37		1.29689e-86	-0.309116	SLFN5		1.63375e-102	-0.0451858	MESP1		1.30366e-33	-1.05967	GART	Known disease genes	1.35755e-25	-1.11415	MAFF		7.45685e-25	-1.43712	CACNA2D2	Prognostic genes	3.39852e-26	-1.42434
446	STK32A		1.44635e-96	-0.620764	S100A9		1.72248e-86	-0.308884	SNF8		1.70362e-102	-0.0450097	HSPB8		1.4169e-33	-1.05788	PKP3		1.36241e-25	-1.11308	TBC1D4		8.34645e-25	-1.43514	ETF1		3.54767e-26	-1.42403
447	PDIA4		1.469e-96	-0.619284	RTKN2		2.44613e-86	-0.308831	ERICH3		2.74408e-102	-0.0448365	IKBKE		1.52717e-33	-1.05611	RAB11FIP1		1.42353e-25	-1.11286	ATOH8		8.37851e-25	-1.43487	SAP30L		3.67788e-26	-1.424
448	SFTPA2		1.4841e-96	-0.617613	FXYD3		2.51669e-86	-0.308341	TEKT2		2.92324e-102	-0.0440775	PARP1		1.53196e-33	-1.05512	WDR12		1.55183e-25	-1.11222	VIM		8.78458e-25	-1.43199	PHLDA2		4.33022e-26	-1.41673
449	TALDO1		1.96347e-96	-0.617521	CP		5.85755e-86	-0.308128	CCDC170		6.24593e-102	-0.043861	TMEM62		1.5629e-33	-1.05441	F12		1.59962e-25	-1.10941	IRAK1	Known disease genes	8.83911e-25	-1.42856	TUBB6		4.36635e-26	-1.41628
450	HABP2		3.50215e-96	-0.616771	PRDX4		1.13766e-85	-0.307934	PTTG1IP	Prognostic genes	6.37807e-102	-0.0437949	CKS1B		1.62823e-33	-1.0523	LIPA		1.62692e-25	-1.10898	PPP3CC		8.96229e-25	-1.42722	SPI1		4.738e-26	-1.41619
451	EPHB4		4.33497e-96	-0.615438	HOMER3	Prognostic genes	1.14285e-85	-0.307632	AQP5		1.12266e-101	-0.0437865	RUNX2		1.62823e-33	-1.05215	MIS18A		1.68186e-25	-1.10803	BEST1		1.0388e-24	-1.42622	MYO1B		5.22823e-26	-1.41539
452	FAM89B		4.71796e-96	-0.614273	NRP1		1.40105e-85	-0.307455	IRF7		1.51608e-101	-0.0437715	CFD		1.75762e-33	-1.05124	MARVELD3		1.8108e-25	-1.10579	XPO5		1.07901e-24	-1.42375	P3H2		5.26999e-26	-1.41436
453	MGLL		5.24607e-96	-0.614036	POLR2H		1.88729e-85	-0.304927	NR2F6		2.47368e-101	-0.0437266	FA2H		2.21027e-33	-1.04916	PSMG3		1.8945e-25	-1.10502	CCAR1		1.1091e-24	-1.42121	PYGO2		5.8043e-26	-1.41222
454	DYNLRB2		9.00857e-96	-0.611646	AHR	Known disease genes	2.40298e-85	-0.304475	RGCC		2.61275e-101	-0.043699	LPGAT1		2.40996e-33	-1.04831	PAPSS2		1.94981e-25	-1.10028	LIFR		1.13341e-24	-1.4208	FOSB		5.86012e-26	-1.41199
455	VKORC1		1.0071e-95	-0.611521	C4orf48	Prognostic genes	2.47596e-85	-0.303867	MT-CO2		3.28746e-101	-0.0435828	RHPN1		2.47711e-33	-1.04526	SIX4		1.99554e-25	-1.09991	UBE2T		1.19556e-24	-1.41928	FGFR2	Known disease genes	6.01959e-26	-1.41021
456	NDUFB2		1.03353e-95	-0.611328	SSR4	Prognostic genes	5.23358e-85	-0.303521	RER1		5.5307e-101	-0.0434282	FBXL19		2.67491e-33	-1.04474	CTDSPL		2.0031e-25	-1.09886	PPP2CB		1.23365e-24	-1.41876	SCAI		6.35206e-26	-1.40932
457	C7orf50		1.58081e-95	-0.610386	MPG		5.55013e-85	-0.303108	AK2		9.61926e-101	-0.0432239	NOP58	Known disease genes	3.00388e-33	-1.04373	EOGT		2.28271e-25	-1.09832	PARP1		1.3952e-24	-1.41863	GORASP2		6.81939e-26	-1.40878
458	KRTCAP2		3.41746e-95	-0.609564	HEBP2		1.49414e-84	-0.303035	MRPL12	Known disease genes	1.04799e-100	-0.0432172	ILF2		3.08472e-33	-1.04366	ARRB1	Prognostic genes	2.63412e-25	-1.09731	KPNA2	Known disease genes / Prognostic genes	1.41188e-24	-1.41712	NPM3	Known disease genes	6.82891e-26	-1.40859
459	TPT1		3.59361e-95	-0.608744	TCEA3		1.88567e-84	-0.302666	PXDN		1.07192e-100	-0.0431936	GRTP1		3.1629e-33	-1.0422	GNAI2		2.64613e-25	-1.09596	ULK2		1.51249e-24	-1.41472	SDCBP		6.99589e-26	-1.40845
460	SLC12A7		4.10299e-95	-0.607522	EPHB4		1.88577e-84	-0.302395	SERPINB1		1.37422e-100	-0.0431398	KCTD10		3.32308e-33	-1.04116	SBDS		2.65101e-25	-1.09573	IBA57		1.63968e-24	-1.41413	NUP155		7.34937e-26	-1.40824
461	TRIP6		5.10981e-95	-0.606139	SPINT1		2.37142e-84	-0.301864	RNF181		1.83334e-100	-0.0429764	MAP3K3		3.37695e-33	-1.03845	SLCO2A1		2.6697e-25	-1.09539	RCC2		1.70008e-24	-1.41378	PCDH9		7.48103e-26	-1.408
462	MUC1		8.93191e-95	-0.605635	PON3		2.64212e-84	-0.301641	TAF10		2.61823e-100	-0.0429586	ARHGEF19		3.90652e-33	-1.033	NSF		2.67806e-25	-1.09373	POLR2H		1.85192e-24	-1.41167	COLEC12		7.74893e-26	-1.40697
463	TSHZ2		1.14922e-94	-0.605599	LMNA	Known disease genes	5.08674e-84	-0.301249	NDUFA2		3.42934e-100	-0.0428452	NSUN2		4.0544e-33	-1.03195	ADGRE5		2.91633e-25	-1.09302	CPAMD8		2.03078e-24	-1.41162	STK39	Known disease genes	7.7514e-26	-1.406
464	LRRC23		1.70047e-94	-0.60531	CFAP126		7.18278e-84	-0.301162	GSN		6.63224e-100	-0.0426393	SFTPC	Known disease genes	4.27808e-33	-1.02948	TLCD1		3.05481e-25	-1.093	RSPH4A		2.04409e-24	-1.41153	SUSD2		8.04292e-26	-1.40247
465	SIPA1		1.97651e-94	-0.605029	EDNRB		8.1243e-84	-0.301025	BZW1		8.93979e-100	-0.0425015	P4HB		4.89661e-33	-1.0285	BOP1		3.63355e-25	-1.09197	DONSON		2.04652e-24	-1.41031	MTX2		8.07063e-26	-1.40205
466	PODXL2		2.3097e-94	-0.604732	RPL22L1		8.90168e-84	-0.300041	CALU		1.18224e-99	-0.0423926	RCC2		4.99692e-33	-1.02817	LAD1		3.65717e-25	-1.09153	SIK2		2.24006e-24	-1.40972	B3GNT2		8.7579e-26	-1.40166
467	TRMT112		2.39717e-94	-0.602752	SMCO4		1.00665e-83	-0.297375	SERPINH1		1.34688e-99	-0.0423812	WDR46		5.36993e-33	-1.02768	KCNN4		3.98871e-25	-1.08957	NSF		2.49987e-24	-1.40636	PMP22		8.8789e-26	-1.40053
468	STAT1		3.80886e-94	-0.601664	IGFBP6		1.04933e-83	-0.294896	RPL4		3.04749e-99	-0.042326	SLC25A13	Prognostic genes	5.64415e-33	-1.02429	NEDD9		4.20083e-25	-1.08617	RDX		2.49987e-24	-1.40607	AARD		9.09589e-26	-1.3993
469	EFHC1		4.39922e-94	-0.601262	CEACAM1		1.05967e-83	-0.29454	HLA-B		3.39391e-99	-0.0421485	LRRC36		5.64726e-33	-1.02346	GCNT3		4.77098e-25	-1.08567	SLC39A11	Prognostic genes	2.50269e-24	-1.40598	B4GALT2		9.33567e-26	-1.39813
470	SEC61A1		4.99811e-94	-0.600444	EIF3H		1.9029e-83	-0.293575	LAPTM4B		3.50211e-99	-0.0420682	CLDN12		5.98838e-33	-1.02317	COLEC12		5.00694e-25	-1.08522	TPSB2		2.60061e-24	-1.40575	NEK7		9.60078e-26	-1.39741
471	ASCC2		6.52495e-94	-0.598717	EFCAB10		2.24737e-83	-0.293102	TFPI2		5.98368e-99	-0.0419187	CCAR1		6.22788e-33	-1.02233	SEC14L1		5.02609e-25	-1.0827	GART	Known disease genes	2.82019e-24	-1.40444	CLK2		9.77079e-26	-1.39731
472	PHPT1		8.45264e-94	-0.597456	C1orf122		2.24774e-83	-0.292887	SNRPB		9.78406e-99	-0.0419047	MTMR10		6.61151e-33	-1.02174	SERTAD1		5.20418e-25	-1.08047	SLC2A1	Prognostic genes	3.10964e-24	-1.39914	LIMD1		9.84523e-26	-1.39464
473	EIF3E	Known disease genes	8.75226e-94	-0.593585	HINT1		2.56681e-83	-0.292857	CYCS		4.26143e-98	-0.0417536	BAIAP2L1		7.12717e-33	-1.0193	EIF4E3		5.52017e-25	-1.07542	GADD45B		3.2359e-24	-1.39911	LPCAT3		1.05431e-25	-1.39147
474	GALNT2		8.75226e-94	-0.593541	IGFBP7		2.59586e-83	-0.292496	CCM2		5.33095e-98	-0.0415714	INTS7		7.21824e-33	-1.01844	SDCBP		5.77399e-25	-1.07448	DENND5A		3.34478e-24	-1.39753	VMP1		1.0569e-25	-1.39135
475	SFTPB		1.46207e-93	-0.58996	IFNAR2		9.04201e-83	-0.291805	MRPS31		7.18245e-98	-0.0414854	DDX56		7.61266e-33	-1.0167	PTRH2		5.78876e-25	-1.07415	TSPAN12		3.39125e-24	-1.39487	RRAS		1.07172e-25	-1.39021
476	PAM		2.29442e-93	-0.589516	NPEPPS		1.1066e-82	-0.291611	EIF3B		7.95098e-98	-0.0413837	B4GALT3		8.25039e-33	-1.01594	NPM3	Known disease genes	6.22988e-25	-1.07179	PYGO2		3.66004e-24	-1.39418	ZNF217		1.08813e-25	-1.38975
477	RASGRF1		2.67713e-93	-0.589376	DAP		1.29599e-82	-0.2892	EEF1A1		1.04955e-97	-0.0412747	HES6		1.01306e-32	-1.01458	ATAT1		6.3528e-25	-1.07047	TRAK2		3.78889e-24	-1.3937	ZNF692		1.10131e-25	-1.38866
478	XIAP		2.75407e-93	-0.587848	ANGPTL4		2.18915e-82	-0.288324	PDIA4		1.1532e-97	-0.0412246	PUS1		1.06474e-32	-1.01434	PC		6.61032e-25	-1.07027	CORO1C	Prognostic genes	3.88509e-24	-1.39119	BCL2L15		1.12718e-25	-1.38721
479	LAMB3		3.44232e-93	-0.579929	GAMT		2.51787e-82	-0.288139	CCDC153		1.24024e-97	-0.0411953	ALG8		1.18695e-32	-1.01397	ST14		6.96337e-25	-1.06857	AQP4	Known disease genes	3.9066e-24	-1.38941	SLC46A2		1.14205e-25	-1.38705
480	CALM1		3.64027e-93	-0.579802	IFI44		2.63952e-82	-0.288054	SNU13		1.42333e-97	-0.0410654	SIX1		1.27363e-32	-1.01373	R3HDM1		6.96756e-25	-1.06703	FLRT3		4.17255e-24	-1.38796	PC		1.18949e-25	-1.38686
481	SOCS3		3.98701e-93	-0.579664	TMSB4X		5.27706e-82	-0.287918	RPS26		4.52653e-97	-0.0408252	PHACTR2		1.28715e-32	-1.01333	NEK7		7.38463e-25	-1.06665	SLCO2A1		4.22576e-24	-1.38774	DAP3		1.20287e-25	-1.38625
482	PPIC		6.57637e-93	-0.579235	SQSTM1		5.98574e-82	-0.287832	PSMG3		5.62128e-97	-0.0408162	ZMYND19		1.31068e-32	-1.01275	DAP3		7.4279e-25	-1.06637	IL11RA		4.31626e-24	-1.3877	ZNF138		1.22285e-25	-1.38602
483	SEZ6L2		6.88201e-93	-0.575799	CAPN8		9.60344e-82	-0.287725	EIF3E	Known disease genes	5.62128e-97	-0.0407259	BRI3BP		1.31401e-32	-1.01163	GAPDH	Known disease genes / Prognostic genes	8.0192e-25	-1.06516	NRGN		4.75172e-24	-1.38658	ARHGAP44		1.32735e-25	-1.38536
484	CCDC6		1.1303e-92	-0.574144	SUMO3		1.25398e-81	-0.287424	PRRC2C		7.62781e-97	-0.040592	PLAU	Prognostic genes	1.31733e-32	-1.01154	MCM6		8.21289e-25	-1.06403	PLAGL1		4.80485e-24	-1.38644	BRIX1		1.47908e-25	-1.38466
485	TNNC1		1.22506e-92	-0.573918	PFKP		1.30983e-81	-0.287283	CLDN4		7.77077e-97	-0.0402941	ATAD3B		1.64516e-32	-1.01111	DUS1L		8.29005e-25	-1.0638	CHI3L2		4.93387e-24	-1.38591	EOGT		1.51103e-25	-1.37917
486	UQCR11		1.29775e-92	-0.572177	HPN		1.48664e-81	-0.286893	PARK7	Prognostic genes	1.21523e-96	-0.0401262	ZNF107		1.67702e-32	-1.00899	KDELR2		8.51147e-25	-1.06287	C11orf80		4.98689e-24	-1.38397	CCAR1		1.5504e-25	-1.37726
487	HLA-F		1.3543e-92	-0.571761	GLS		1.75372e-81	-0.286199	RTKN2		1.43116e-96	-0.0397707	CENPH		1.69763e-32	-1.00609	MTX2		8.82486e-25	-1.0601	RAB8B		5.5663e-24	-1.38346	SNRPE		1.6115e-25	-1.37433
488	KCNK5		1.85728e-92	-0.571311	GSN		1.95147e-81	-0.284503	NT5E		1.62127e-96	-0.0396479	MGME1		1.88919e-32	-1.0053	ABCA3		9.16925e-25	-1.06006	HEATR1		6.15689e-24	-1.37955	NFIX		1.923e-25	-1.36887
489	ISG15		2.12174e-92	-0.571174	NONO		2.95552e-81	-0.283947	TRMT112		3.20083e-96	-0.0394508	GMFG		2.13546e-32	-1.00512	PIAS3		9.26552e-25	-1.05941	MMP28		7.29376e-24	-1.37905	RNF13		1.96784e-25	-1.36865
490	MT-ND2		4.4837e-92	-0.56848	RGS17		3.18804e-81	-0.282924	NDUFS8		3.7621e-96	-0.0393193	ASPHD1		2.29949e-32	-1.00344	KRT80		1.06141e-24	-1.05723	PIK3R1		7.40103e-24	-1.37749	SORBS3		2.06787e-25	-1.36827
491	CCNJL		4.97625e-92	-0.567898	ZNF593		4.98111e-81	-0.282441	UQCRB		4.42726e-96	-0.0391257	ALG3		2.30125e-32	-1.00224	KIF22		1.08604e-24	-1.05634	FBXL3		7.69828e-24	-1.37529	TTC28		2.07945e-25	-1.36631
492	CCNI		5.1238e-92	-0.566353	CXXC5		6.81806e-81	-0.282372	RAB25		4.75428e-96	-0.0388564	ENO1	Known disease genes	2.46311e-32	-1.00065	IPO4	Known disease genes	1.16181e-24	-1.05629	IQSEC1		7.75779e-24	-1.37206	KDELR2		2.54522e-25	-1.36511
493	HP1BP3		8.42629e-92	-0.56535	ZYX		6.95516e-81	-0.281753	ASS1		1.42813e-95	-0.0386013	SIDT2		2.61375e-32	-0.999683	CORO1C	Prognostic genes	1.20812e-24	-1.05533	ZMYND10		8.49008e-24	-1.37136	R3HDM1		2.72833e-25	-1.36439
494	ENDOD1		1.03069e-91	-0.562335	RHEB		1.67612e-80	-0.281396	SSBP1		3.60947e-95	-0.0384699	SNRPA1		2.88507e-32	-0.999663	ZNF138		1.22854e-24	-1.05489	TBC1D9		9.05629e-24	-1.36786	ARRB2		2.8448e-25	-1.36176
495	NMT1		1.11695e-91	-0.561951	PDE4C		3.35337e-80	-0.281283	HYDIN		5.3075e-95	-0.0384556	NET1		3.14217e-32	-0.997846	NUP155		1.37441e-24	-1.05331	MTIF2		9.2274e-24	-1.3653	AQP4	Known disease genes	3.0345e-25	-1.36103
496	CNN3		2.16905e-91	-0.559418	NDUFB4		4.01277e-80	-0.280783	CHMP4B		5.93629e-95	-0.0384329	PDXDC1		3.39486e-32	-0.997663	CLK2		1.39864e-24	-1.05321	FMO3		9.51459e-24	-1.36397	ANO6		3.1281e-25	-1.36033
497	CAPN8		2.63035e-91	-0.557756	MYO6		4.21705e-80	-0.280489	NAA10	Known disease genes	6.63329e-95	-0.0382964	METTL7B		3.40793e-32	-0.997244	CHPF2		1.4443e-24	-1.05308	NOP58	Known disease genes	1.01037e-23	-1.36326	NAT9		3.38026e-25	-1.35899
498	COMMD6		2.88421e-91	-0.557736	GALNT2		4.85817e-80	-0.280289	NBL1		7.16513e-95	-0.0381704	UTP14A		3.7833e-32	-0.996461	SLC27A3		1.54013e-24	-1.05292	HMGN1		1.04784e-23	-1.36306	NOP58	Known disease genes	3.6982e-25	-1.35556
499	MRPL17		3.55562e-91	-0.557425	CIT		5.09749e-80	-0.279468	SELENBP1	Prognostic genes	8.11939e-95	-0.0381388	TAF1D		3.81846e-32	-0.995907	C1QA		1.5818e-24	-1.05235	ABCC3		1.24954e-23	-1.36127	SACM1L		3.71112e-25	-1.35464
500	IRAK1	Known disease genes	3.57282e-91	-0.556059	MGRN1		6.58595e-80	-0.279294	GADD45GIP1		8.85884e-95	-0.0381012	MAFF		4.92818e-32	-0.99557	TBRG4		1.59793e-24	-1.05201	PDXDC1		1.43873e-23	-1.35654	ATAT1		3.78669e-25	-1.35401
501	SPATS2L	Prognostic genes	4.02791e-91	-0.554323	BCR		1.33708e-79	-0.278884	UBXN1		1.256e-94	-0.0379673	METTL1		5.12659e-32	-0.995018	SLC7A5		1.66071e-24	-1.05179	PMM2		1.46115e-23	-1.35369	SBDS		3.99281e-25	-1.35121
502	SLC22A18		9.1221e-91	-0.553966	PLAUR		1.60176e-79	-0.278483	RPLP1		1.38171e-94	-0.037866	PLA2G4F		5.30412e-32	-0.99467	EFEMP1		1.82132e-24	-1.04903	CCND2		1.46886e-23	-1.35346	SMAD7		4.42779e-25	-1.34818
503	SRM	Known disease genes	9.99749e-91	-0.547432	SPINK1		2.03575e-79	-0.27736	LDHB		1.52055e-94	-0.0378055	HDGF		5.71431e-32	-0.994597	DCN		1.85793e-24	-1.04463	ILF2		1.51036e-23	-1.35256	DUS4L		4.90056e-25	-1.34812
504	PGLS		1.01679e-90	-0.5467	TMEM231		2.75396e-79	-0.275934	SLIRP		1.61025e-94	-0.0377581	DNAAF5		6.45775e-32	-0.993904	PTGES		1.88083e-24	-1.04197	SYNJ2		1.51184e-23	-1.35	KCNN4		5.23072e-25	-1.34511
505	MAPK13		1.73262e-90	-0.545821	FAM207A		3.13638e-79	-0.275677	MCTS1		1.74814e-94	-0.037667	PDCD6		7.9587e-32	-0.991175	MRGBP		1.88083e-24	-1.04193	ADGRE5		1.80986e-23	-1.34649	CORO1C	Prognostic genes	6.3274e-25	-1.34355
506	APH1A		1.96793e-90	-0.545387	B3GNT3		6.25931e-79	-0.274987	CARHSP1		5.50787e-94	-0.0376014	DDX55		9.18577e-32	-0.990668	ZCCHC24		1.88249e-24	-1.04107	REPS2		1.80986e-23	-1.34603	SLC15A3		6.60004e-25	-1.34313
507	PSMD11		2.14547e-90	-0.545019	EFNA5		8.94032e-79	-0.274363	VMP1		5.57456e-94	-0.0375093	GGA2		9.63235e-32	-0.990075	BRIX1		2.0724e-24	-1.03983	MAP3K8		1.81369e-23	-1.34233	NEBL		6.77881e-25	-1.33348
508	HOMER3	Prognostic genes	2.17977e-90	-0.543714	LRRC59		1.43716e-78	-0.273977	PLSCR1	Prognostic genes	7.96431e-94	-0.0374902	BNIP2		1.10289e-31	-0.988884	LIMD1		2.07391e-24	-1.0396	MACROD2		2.4547e-23	-1.34197	TLCD1		6.80095e-25	-1.33334
509	MGRN1		2.59373e-90	-0.542338	CHL1		1.50765e-78	-0.273854	RAI14		9.26113e-94	-0.0374778	HMGN1		1.49467e-31	-0.988553	C1QB		2.17629e-24	-1.03945	KLF10		2.47438e-23	-1.33893	PPP2CB		7.8066e-25	-1.33324
510	IL27RA		2.99846e-90	-0.541537	SNX21		2.01709e-78	-0.273473	SAXO2		1.16723e-93	-0.0374716	GSDMB		1.56035e-31	-0.986228	WDR46		2.18487e-24	-1.0388	GMPPA		2.64566e-23	-1.33749	GNPNAT1	Known disease genes	8.05165e-25	-1.33207
511	PARP1		3.11219e-90	-0.540455	ACADL		5.56715e-78	-0.273064	CPE		1.33449e-93	-0.0373008	ICA1		1.58091e-31	-0.985403	RHNO1		2.30817e-24	-1.03851	ATP10B		2.80708e-23	-1.33175	SHC3		8.81e-25	-1.32986
512	NDUFB7		3.25665e-90	-0.538608	APLP2		6.16523e-78	-0.272532	ITGB4		3.53762e-93	-0.0371939	MUC21		1.86374e-31	-0.983801	TYROBP		2.571e-24	-1.03645	ZNF331		3.06296e-23	-1.3284	PPFIBP1		9.4263e-25	-1.32472
513	EGFR	Known disease genes	4.6137e-90	-0.538559	KRT19		7.27012e-78	-0.271613	MX2		3.665e-93	-0.037122	SLC37A3		1.88447e-31	-0.981546	SLC25A39		2.5977e-24	-1.0364	C4orf3		3.11778e-23	-1.32825	MITF		9.43219e-25	-1.32399
514	LDHB		4.79011e-90	-0.538344	SNF8		7.47245e-78	-0.2711	LPL		5.47943e-93	-0.0370312	DAPK2		2.12993e-31	-0.980743	C11orf96		2.77201e-24	-1.03482	WWTR1		3.34593e-23	-1.32745	APOL3		9.66245e-25	-1.32196
515	GALNT10		4.79011e-90	-0.536645	LGI3		1.95891e-77	-0.271063	CTNNB1	Known disease genes	6.48866e-93	-0.036891	GPM6B		2.165e-31	-0.977721	PPP2CB		2.7992e-24	-1.03348	HECA		3.37173e-23	-1.32689	MGME1		1.00226e-24	-1.32138
516	PSMG3		6.83695e-90	-0.534955	PSMB3		2.0976e-77	-0.270835	PSMB8		7.06707e-93	-0.036852	EGR2		2.22748e-31	-0.977445	ESRP1		2.81005e-24	-1.03255	RILP		3.39786e-23	-1.32567	RDX		1.01561e-24	-1.32134
517	GADD45A		6.97603e-90	-0.533354	TSPAN9		2.22915e-77	-0.261222	C5orf49		9.35449e-93	-0.0367365	CCHCR1		2.39684e-31	-0.977262	SNRPE		2.8278e-24	-1.03218	ETS1		3.55355e-23	-1.3207	ADGRE5		1.16348e-24	-1.32006
518	PGAM1	Prognostic genes	8.72713e-90	-0.532261	NPNT		2.8218e-77	-0.260673	NPNT		1.13568e-92	-0.0362863	MVB12B		2.4287e-31	-0.976018	DAB2IP		3.04565e-24	-1.03122	LRRK2		3.58955e-23	-1.31896	ABCC3		1.2248e-24	-1.31835
519	MYO6		9.83549e-90	-0.531185	YKT6		3.61719e-77	-0.26061	MPG		2.08201e-92	-0.0362526	C1orf198		2.67077e-31	-0.975672	NOP58	Known disease genes	3.06566e-24	-1.0301	HPCAL1		3.71226e-23	-1.31759	LIFR		1.29088e-24	-1.31444
520	RNF7		1.1095e-89	-0.531149	TIMP3		6.10778e-77	-0.260177	ERGIC1		2.23047e-92	-0.036231	CREB3L4	Prognostic genes	2.76667e-31	-0.975255	ANKRD29		3.1453e-24	-1.02925	FANCF		3.77748e-23	-1.31752	IRAK1	Known disease genes	1.29622e-24	-1.3137
521	SF3B6		1.13408e-89	-0.53108	MRPL17		6.98937e-77	-0.259613	CTNNA1		2.47704e-92	-0.0361554	NAA40		2.98254e-31	-0.97514	IQSEC1		3.27675e-24	-1.02884	SFTPC	Known disease genes	3.79483e-23	-1.31704	TIMP3		1.36057e-24	-1.31205
522	LGALS3		1.30199e-89	-0.528977	REL		9.29242e-77	-0.259363	TALDO1		2.57098e-92	-0.0361153	GORAB		3.02069e-31	-0.974545	PARP1		3.55004e-24	-1.02518	NUP85		3.83494e-23	-1.31688	PIAS3		1.52894e-24	-1.31115
523	TXNRD1		2.85127e-89	-0.52893	PSME2		1.07266e-76	-0.25841	BID		3.07164e-92	-0.0360625	MANEAL		3.13305e-31	-0.972828	ZNF692		4.03763e-24	-1.02327	TIMP1		4.14681e-23	-1.3161	RHNO1		1.60242e-24	-1.30986
524	POLR2H		3.78009e-89	-0.528795	NFE2L3		3.34531e-76	-0.256166	NECAB1		4.38473e-92	-0.0359683	COPS7B		3.25035e-31	-0.972756	INTS7		4.51835e-24	-1.02072	PIK3IP1		4.30541e-23	-1.3144	DBF4		1.63295e-24	-1.30707
525	SERPINB1		8.59355e-89	-0.528492	SUPT4H1		3.59405e-76	-0.253967	KPNB1		5.5172e-92	-0.0359324	SLC1A1		3.28774e-31	-0.971897	SLC52A2		4.53322e-24	-1.02012	DAB2		4.33695e-23	-1.31396	PTGES		1.7461e-24	-1.30406
526	DUOX1		1.27194e-88	-0.528145	SURF4		5.0869e-76	-0.253063	BLVRA		5.62165e-92	-0.0358827	PPME1		3.29245e-31	-0.96966	UTP14A		4.74677e-24	-1.01883	SPATS2		4.6254e-23	-1.31294	SLCO2A1		1.88053e-24	-1.30303
527	NBEAL1		1.46925e-88	-0.528052	ADAM15		6.86668e-76	-0.252515	KDELR3		6.95642e-92	-0.0358559	CPSF3		3.31956e-31	-0.969547	DDX56		4.91512e-24	-1.01811	TEX14		4.71799e-23	-1.31254	PPME1		1.88459e-24	-1.30301
528	MRPL36		2.33148e-88	-0.528033	KRT15		8.02414e-76	-0.252367	PHPT1		1.12902e-91	-0.035656	DNAJA3		3.77762e-31	-0.966858	LPCAT3		5.28441e-24	-1.01737	KDELR3		4.86615e-23	-1.31194	MRGBP		1.94915e-24	-1.30248
529	SET	Prognostic genes	2.64509e-88	-0.527714	IRAK1	Known disease genes	1.07584e-75	-0.249913	APH1A		1.13757e-91	-0.0356482	CCT5	Known disease genes	4.04056e-31	-0.964988	HHIP		5.39538e-24	-1.01727	ASGR1		4.89071e-23	-1.30877	MFSD2A		1.97444e-24	-1.30154
530	MCTS1		6.64758e-88	-0.526482	IFI27L2		1.20966e-75	-0.249624	DSG2		2.48372e-91	-0.035432	SRGAP2C		4.05881e-31	-0.964932	SIK2		5.44902e-24	-1.01671	HDGF		5.12977e-23	-1.30757	CA2		1.98699e-24	-1.3011
531	MYL9		1.4288e-87	-0.526279	BCL3		1.32245e-75	-0.249454	DUS1L		2.55978e-91	-0.0353883	PPIF		4.41442e-31	-0.964696	APOL3		5.88265e-24	-1.01667	MYO1C		5.1631e-23	-1.30359	CACNB4		2.02184e-24	-1.29898
532	IPO7		1.6223e-87	-0.526268	GOLM1	Known disease genes	1.48416e-75	-0.248878	PPIC		2.94515e-91	-0.0352473	MYH10		4.70256e-31	-0.962446	TJP1		6.18917e-24	-1.01665	ARHGAP30		5.19752e-23	-1.30247	DUOXA1		2.26417e-24	-1.29783
533	JUND		1.69166e-87	-0.524045	ANP32B		3.05614e-75	-0.248426	SLC50A1		3.91254e-91	-0.0351819	PDK4		4.70874e-31	-0.960619	ADCK5		6.35572e-24	-1.01643	ACER3		5.38814e-23	-1.30056	SLC25A13	Prognostic genes	2.3797e-24	-1.2969
534	FAAP20		1.69628e-87	-0.522761	CPM		3.4213e-75	-0.248325	NSA2		4.37282e-91	-0.0351686	ANKS1A		4.90688e-31	-0.960169	DUS4L		6.56619e-24	-1.01626	SMARCA5		5.39369e-23	-1.30015	LDHA	Known disease genes	2.52714e-24	-1.29639
535	OAS3		1.82495e-87	-0.520716	PGK1	Prognostic genes	7.56831e-75	-0.248098	MESP1		6.42143e-91	-0.0351217	VEPH1		4.95446e-31	-0.960048	CCAR1		6.63821e-24	-1.0159	RAB14		5.94744e-23	-1.29953	PLLP		2.60978e-24	-1.29592
536	IRX3		3.75884e-87	-0.519762	SKAP2		8.66924e-75	-0.247208	REEP3		7.96371e-91	-0.0350769	GAB1		5.79421e-31	-0.959357	B3GNT2		6.6492e-24	-1.01559	ERICH3		6.09455e-23	-1.29931	F12		2.80608e-24	-1.29506
537	TMEM123		6.41151e-87	-0.518562	NAA10	Known disease genes	9.58146e-75	-0.247188	TTN	Known disease genes	9.54441e-91	-0.0349714	ALOX5AP		6.8584e-31	-0.959349	NFATC1		6.75075e-24	-1.01501	SEC14L1		6.42234e-23	-1.29896	BAIAP2L1		2.8733e-24	-1.29475
538	TRPM4		8.02637e-87	-0.518414	PAM		1.07321e-74	-0.246857	PIP5K1B		1.32308e-90	-0.0349379	MEF2A		7.40895e-31	-0.959249	LIFR		8.23259e-24	-1.01314	ARHGAP29		6.46316e-23	-1.2983	ZCCHC24		2.8986e-24	-1.29421
539	KCNN4		2.19701e-86	-0.517901	FHAD1		1.66751e-74	-0.245736	PSMB4		1.80766e-90	-0.0349175	NHSL1		9.21412e-31	-0.956807	B4GALT3		8.80923e-24	-1.01271	XPO1		6.96888e-23	-1.29797	CD68		3.08097e-24	-1.29135
540	PEBP1		2.56583e-86	-0.516962	TNFRSF10B		1.97184e-74	-0.245242	NEK5		1.98744e-90	-0.0346383	DSP		9.27352e-31	-0.954377	GALNT14		9.56188e-24	-1.00797	ZNF217		7.09718e-23	-1.29684	IKBKE		3.33633e-24	-1.29072
541	SNRPD2		7.15896e-86	-0.515665	SOCS3		2.27012e-74	-0.244775	POLR2H		3.22025e-90	-0.034587	NME4		1.00719e-30	-0.95426	MROH6		9.57352e-24	-1.00671	RAB11FIP1		7.12305e-23	-1.29602	ABCA3		3.486e-24	-1.29042
542	ID3		7.55173e-86	-0.514524	STK33		2.44672e-74	-0.244687	SPINT1		3.91832e-90	-0.0345379	ICAM2		1.12136e-30	-0.954225	ETS1		1.01007e-23	-1.00664	DCDC2		7.86147e-23	-1.29295	DENND5A		3.71268e-24	-1.28902
543	MRPS15		1.55904e-85	-0.514201	MGAT4B		2.71109e-74	-0.242648	VKORC1		6.404e-90	-0.0345369	CDCA4	Prognostic genes	1.22056e-30	-0.953702	TMTC4		1.04364e-23	-1.00608	PARD6B		8.06845e-23	-1.29287	MYO1C		3.81382e-24	-1.28776
544	TIMM13		1.8609e-85	-0.512754	WDR45B		3.02975e-74	-0.242235	SURF4		6.77925e-90	-0.0343419	NFS1		1.37741e-30	-0.949316	FHL2		1.06111e-23	-1.00571	CRBN		8.30678e-23	-1.29267	SNRPA1		3.90735e-24	-1.28755
545	CBX1		1.90184e-85	-0.512054	ICA1		6.56607e-74	-0.242199	MIDN		7.15889e-90	-0.0342228	RABIF		1.40062e-30	-0.94876	DENND5A		1.11383e-23	-1.0052	CDKL5		8.48503e-23	-1.29216	SIK2		4.44125e-24	-1.28518
546	TAP1		2.1006e-85	-0.51138	CLCF1		1.01216e-73	-0.241504	PERP		7.65845e-90	-0.0342006	ATAD3A		1.40062e-30	-0.948456	MGME1		1.14221e-23	-1.00319	COG2		8.924e-23	-1.28935	RCC2		5.37122e-24	-1.28286
547	CHMP4B		2.61352e-85	-0.508046	CLDN3		1.35712e-73	-0.239848	PTPN12		8.86468e-90	-0.034186	EMP1		1.42274e-30	-0.947877	DNAJA3		1.24993e-23	-1.00162	NSUN2		9.02717e-23	-1.28875	RAB11FIP1		5.3975e-24	-1.28131
548	EIF4G2		4.07797e-85	-0.507345	TUBA4A		1.53164e-73	-0.23972	PPP4C	Prognostic genes	1.48049e-89	-0.0340775	SKIV2L		1.453e-30	-0.947822	IKBKE		1.27475e-23	-1.00139	TMEM164		9.10511e-23	-1.28853	ETS1		5.53159e-24	-1.28106
549	MALSU1		5.03894e-85	-0.50624	CYBA		1.66901e-73	-0.239068	LRRC59		1.48616e-89	-0.0339349	TTYH3		1.53481e-30	-0.947821	LDHA	Known disease genes	1.36621e-23	-1.00073	LNX2		9.12873e-23	-1.28727	SFTPD		5.54231e-24	-1.27966
550	RPL41		5.31321e-85	-0.506022	ABRACL		1.88907e-73	-0.238763	SOCS3		1.55812e-89	-0.0338878	BYSL		1.68817e-30	-0.945064	RCC2		1.42365e-23	-1.00063	STARD4		9.5278e-23	-1.28605	EIF4E3		5.84959e-24	-1.27871
551	SOX4		5.9617e-85	-0.505154	DPY19L1		1.94086e-73	-0.236647	KCNN4		1.98292e-89	-0.0338821	GMNN		2.04619e-30	-0.943649	ZMYND19		1.49744e-23	-1.00045	TARS2		9.82734e-23	-1.28592	PKIG		6.36544e-24	-1.27668
552	ZNHIT1		7.44917e-85	-0.50461	SGK1		2.9556e-73	-0.236175	TMEM106B		2.40914e-89	-0.0336643	CSRP1		2.17752e-30	-0.943087	SYT12		1.54727e-23	-0.999904	HLF		9.89247e-23	-1.28299	MCM6		6.50099e-24	-1.27619
553	CTNNA1		9.5046e-85	-0.504536	TIMM50		3.20666e-73	-0.236132	CAMK2N1		2.52983e-89	-0.0336548	ARHGAP24		2.45316e-30	-0.943029	DBF4		1.55086e-23	-0.999268	FBP1		1.02634e-22	-1.28286	GADD45B		6.85166e-24	-1.27504
554	DRAP1		1.29305e-84	-0.502603	PSMG3		3.6655e-73	-0.23571	CTSB		4.33302e-89	-0.033418	UBE2O		2.48905e-30	-0.941645	VIM		1.57869e-23	-0.998768	DNAH14		1.02771e-22	-1.27706	CPSF3		7.02998e-24	-1.274
555	TUBA1C	Prognostic genes	2.21376e-84	-0.501442	RAD23B		3.69e-73	-0.234522	STK32A		4.57651e-89	-0.0333925	SCG5		2.4913e-30	-0.94158	CEACAM1		1.62442e-23	-0.997168	SH3D19		1.0309e-22	-1.27481	TRAK2		7.10541e-24	-1.27391
556	SQLE		2.2858e-84	-0.500959	RNF181		3.70591e-73	-0.234357	COX20		6.27026e-89	-0.03332	TMEM45B		2.62774e-30	-0.941457	SHC3		1.65828e-23	-0.996983	MSMO1		1.05291e-22	-1.27414	FBP1		7.16163e-24	-1.27174
557	POMP		3.25072e-84	-0.500265	CNP		4.12244e-73	-0.233165	TCEA3		6.70811e-89	-0.0332905	SASS6		2.73882e-30	-0.941448	ILF2		1.69452e-23	-0.996682	FBXO7		1.11571e-22	-1.27368	RFX2		7.46132e-24	-1.27149
558	TPM4		4.452e-84	-0.500085	TMED9		4.99907e-73	-0.231371	EEF2		1.1735e-88	-0.0330842	ARHGAP18		2.79876e-30	-0.937776	SACM1L		1.7443e-23	-0.996647	SUSD2		1.11827e-22	-1.27359	LRRK2		7.58448e-24	-1.26816
559	SRPK1		6.79266e-84	-0.499689	SPATA18	Prognostic genes	5.64045e-73	-0.230362	GPX4		1.20881e-88	-0.0328899	MTHFD2		2.87651e-30	-0.937525	OSTM1		1.78941e-23	-0.995731	CHPF2		1.1403e-22	-1.26897	ABHD5		7.66478e-24	-1.26673
560	TMPRSS4		6.79398e-84	-0.499347	BZW1		6.9653e-73	-0.229442	ENKUR		1.74672e-88	-0.0328602	PIP5K1B		3.5027e-30	-0.937478	ALG8		1.79374e-23	-0.995125	PDCD6		1.14505e-22	-1.26761	SNX25		7.72476e-24	-1.26394
561	PTN		1.05781e-83	-0.499213	CAMK1D		8.68156e-73	-0.229156	C1QB		2.69594e-88	-0.0327681	MCTS1		3.63621e-30	-0.937465	EGR1		1.79627e-23	-0.993986	SPAG4		1.24124e-22	-1.26661	PARP1		7.81584e-24	-1.26335
562	NUDT22		1.2557e-83	-0.499153	EFCAB1		1.30237e-72	-0.228492	SAT1		3.11101e-88	-0.0327555	JUND		3.67831e-30	-0.936712	PFKP		1.82333e-23	-0.992994	TPST2		1.26751e-22	-1.2619	LPXN		8.32248e-24	-1.26199
563	PSMB9		1.58921e-83	-0.498244	SOX9		1.53971e-72	-0.227695	POMP		3.53822e-88	-0.0327455	GADD45B		3.74583e-30	-0.936525	COPS7B		1.94335e-23	-0.991441	MAPK10		1.27885e-22	-1.26108	SLC37A3		8.77804e-24	-1.26124
564	TFPI2		1.85411e-83	-0.494018	CCDC153		1.63312e-72	-0.227287	HNRNPA3		3.63172e-88	-0.0326996	RTKN		3.93694e-30	-0.935193	CRTAC1		1.98439e-23	-0.99058	SLC35F2		1.38419e-22	-1.26093	DNAAF5		9.06677e-24	-1.26087
565	ADAM8		1.86001e-83	-0.493677	DYNC2H1		1.77564e-72	-0.227287	CRIP2		5.03645e-88	-0.0325652	SMUG1		4.01465e-30	-0.933523	TMEM62		2.1701e-23	-0.990321	SEMA4B		1.40504e-22	-1.26052	EDN1		9.24214e-24	-1.25854
566	LCN2		2.47024e-83	-0.492341	EIF3B		1.78044e-72	-0.227248	SF3B6		5.48788e-88	-0.032553	PDZD2		4.08466e-30	-0.933402	SLC25A13	Prognostic genes	2.47547e-23	-0.985907	ARAP2		1.69119e-22	-1.2605	TMEM220		9.65981e-24	-1.25683
567	CDH1		3.28567e-83	-0.492311	SRPK1		1.81967e-72	-0.227189	QSOX1		6.99644e-88	-0.0324409	GMDS		4.20304e-30	-0.932098	PDXDC1		2.52754e-23	-0.985378	GNAI2		1.7969e-22	-1.25866	CHPF2		1.03279e-23	-1.25329
568	MRPL51		3.5239e-83	-0.492073	NOTCH3		2.53315e-72	-0.22653	SNRPD2		9.54922e-88	-0.0324015	DTYMK		5.02881e-30	-0.930948	SBK1		2.60214e-23	-0.984704	RORA		1.81549e-22	-1.25628	CYP2U1		1.0427e-23	-1.25302
569	CEP126		3.69149e-83	-0.48869	SPEF1		2.61004e-72	-0.226393	HES1		1.26572e-87	-0.032401	IARS2		5.19638e-30	-0.93026	NSUN2		2.62838e-23	-0.982265	INSIG1		1.83291e-22	-1.25546	TMEM139		1.06127e-23	-1.2511
570	FLOT1		5.13828e-83	-0.486928	HBA2		2.73912e-72	-0.224729	LAGE3		1.26572e-87	-0.0323751	DPH2		5.54071e-30	-0.93012	CPSF3		2.71059e-23	-0.982202	LRRC59		1.84598e-22	-1.25351	BYSL		1.06248e-23	-1.24976
571	CCDC153		5.60449e-83	-0.485989	RSPH1	Prognostic genes	2.96596e-72	-0.224388	CAPN12		1.37125e-87	-0.0322476	PAQR4		5.62653e-30	-0.929603	GNPNAT1	Known disease genes	2.72207e-23	-0.980819	DAB2IP		1.85719e-22	-1.25238	DNAJB4		1.08516e-23	-1.24938
572	PPA1		6.36131e-83	-0.484774	NACA		3.18747e-72	-0.222668	IFI27L2		1.85932e-87	-0.0322327	CCDC167		5.67926e-30	-0.929208	NR4A3		2.85698e-23	-0.979762	ZHX3		1.90766e-22	-1.25141	CLIC3		1.14982e-23	-1.24822
573	SLC52A2		8.49648e-83	-0.484546	TXNRD1		3.82038e-72	-0.222636	SET	Prognostic genes	1.88413e-87	-0.0321933	SOX12		5.7723e-30	-0.927897	DNAAF5		2.94877e-23	-0.979734	PLAC8		2.09173e-22	-1.24956	TBRG4		1.20249e-23	-1.24757
574	GIPC1		1.16564e-82	-0.484405	CBX1		4.15388e-72	-0.222425	ZBBX		2.10045e-87	-0.032033	HDHD3		5.99292e-30	-0.927698	HDGF		3.02659e-23	-0.979427	NPLOC4		2.09521e-22	-1.24371	FILIP1		1.20542e-23	-1.24285
575	AP3S1		1.38095e-82	-0.483117	CALU		4.52965e-72	-0.222309	UQCR11		2.80428e-87	-0.0320218	SLC35B1		6.22757e-30	-0.927229	NFS1		3.40942e-23	-0.979382	PODXL		2.12443e-22	-1.2433	ALG8		1.20797e-23	-1.24281
576	PPDPF		3.31974e-82	-0.483087	RNF213		4.67805e-72	-0.221966	SUPT4H1		2.89139e-87	-0.0319635	HACD4		6.29542e-30	-0.926456	SH3D19		3.5332e-23	-0.978549	MOB3B		2.15305e-22	-1.243	NSUN2		1.27146e-23	-1.2422
577	CCDC170		4.51077e-82	-0.482027	SLC22A18		1.05774e-71	-0.2211	PGLS		2.90068e-87	-0.0319237	ZNF92		6.49673e-30	-0.925527	STX2		3.54843e-23	-0.975657	GGTLC1		2.15883e-22	-1.24208	GNAI2		1.31262e-23	-1.24206
578	CXXC5		5.84336e-82	-0.48079	UQCRQ		1.093e-71	-0.220546	IFITM2		6.18615e-87	-0.0318748	SORD		6.77472e-30	-0.92477	PIK3IP1		3.58927e-23	-0.973028	MTURN	Prognostic genes	2.46647e-22	-1.241	CDADC1		1.35146e-23	-1.24108
579	KCNK6	Prognostic genes	6.48889e-82	-0.480433	CCDC170		1.74028e-71	-0.219726	EFCAB1		7.89512e-87	-0.0317372	BARD1		7.21319e-30	-0.92411	SCAI		3.65704e-23	-0.972989	SEMA3B		2.4779e-22	-1.23899	UTP14A		1.43444e-23	-1.23799
580	ILF2		7.33224e-82	-0.479139	BLVRA		2.26752e-71	-0.217172	RPL22L1		8.3385e-87	-0.031665	HSPA5		7.72572e-30	-0.923156	RABIF		3.80936e-23	-0.971462	TYROBP		2.48352e-22	-1.23575	IQSEC1		1.54549e-23	-1.23681
581	LASP1	Prognostic genes	9.50874e-82	-0.478328	AHCYL1		3.59789e-71	-0.216762	IGFBP7		9.68405e-87	-0.0316072	SH3BGRL		8.92564e-30	-0.921906	P4HB		3.82103e-23	-0.971247	SGCB		2.49921e-22	-1.23478	TMTC4		1.68373e-23	-1.23556
582	RPS26		1.03638e-81	-0.477986	APEX1	Known disease genes	4.60641e-71	-0.214682	OSBPL6		9.77906e-87	-0.031495	FAM98A		9.14983e-30	-0.92162	TLN1		3.83781e-23	-0.970035	ST14		2.58506e-22	-1.2341	WWTR1		1.74879e-23	-1.23332
583	DYNLL1		1.40022e-81	-0.477865	BZW2	Known disease genes	4.74417e-71	-0.214385	TIMM13		1.0937e-86	-0.0313604	XPO1		1.05065e-29	-0.920207	SLC37A3		4.08667e-23	-0.969667	ETV4		2.75769e-22	-1.23294	KLF10		1.95759e-23	-1.23102
584	SLC43A3		1.5845e-81	-0.477687	KPNB1		5.64602e-71	-0.213332	PPA1		1.17157e-86	-0.0313447	TIMP1		1.07281e-29	-0.91991	CDADC1		4.17904e-23	-0.969395	PXDC1		3.05845e-22	-1.23268	HSH2D	Prognostic genes	1.972e-23	-1.22607
585	STK17A		1.5845e-81	-0.477546	HLA-DRB1		5.7827e-71	-0.213284	MALSU1		1.40363e-86	-0.0313044	MTFR1		1.15559e-29	-0.919279	SNRPA1		4.20121e-23	-0.96668	RUSC1		3.0966e-22	-1.23251	HPCAL1		1.98534e-23	-1.22596
586	TNFRSF18		1.94403e-81	-0.477418	SMPDL3B		6.63608e-71	-0.213246	HOMER3	Prognostic genes	1.41832e-86	-0.0311841	DHTKD1		1.20117e-29	-0.919032	TUBB6		4.29419e-23	-0.966547	GAB2		3.53468e-22	-1.2298	METTL1		2.0787e-23	-1.22511
587	COA4		2.49952e-81	-0.474931	NPDC1		7.77904e-71	-0.212288	BET1		1.6805e-86	-0.0309831	CCDC69		1.33677e-29	-0.917826	PPME1		5.26548e-23	-0.966484	SMYD5		3.56168e-22	-1.22843	C4orf3		2.08374e-23	-1.22419
588	NDUFA4		2.52425e-81	-0.473938	SUMO2		8.28309e-71	-0.209903	KRTCAP2		2.00062e-86	-0.0309398	CASP6		1.47803e-29	-0.917759	LPGAT1		5.27219e-23	-0.966228	BAIAP2L1		3.68466e-22	-1.22546	SLC15A2	Known disease genes	2.1614e-23	-1.22387
589	UQCC3		2.62053e-81	-0.47352	NUDT22		9.01847e-71	-0.208517	LEMD1		2.04696e-86	-0.0308287	TTF2		1.68962e-29	-0.917666	HMGN1		5.85527e-23	-0.966172	POLG2		4.34673e-22	-1.2229	SLFN13		2.1766e-23	-1.22327
590	HSPE1		2.80626e-81	-0.470739	MCTS1		9.07379e-71	-0.206889	C6orf118		5.53952e-86	-0.030759	SLC16A9		1.83955e-29	-0.915112	C4orf3		5.9003e-23	-0.966167	TMEM69		4.76574e-22	-1.22067	OSTM1		2.36408e-23	-1.22246
591	ABCF1		5.0057e-81	-0.470411	CAV1		9.41239e-71	-0.206725	ADAR		5.65836e-86	-0.030433	SNX2		1.92461e-29	-0.913154	LAMB2		5.93982e-23	-0.964918	MTM1		5.4777e-22	-1.22043	SEC14L1		2.49682e-23	-1.22196
592	METTL7B		5.34788e-81	-0.470376	DYNLL2		1.03146e-70	-0.205983	KCNK1		5.8786e-86	-0.03042	PTPN1		2.08476e-29	-0.911158	FBXL19		5.96768e-23	-0.963346	SDC2		5.61498e-22	-1.21908	SLC16A11		2.52004e-23	-1.21628
593	MRPS6		6.36062e-81	-0.470352	VKORC1		1.12463e-70	-0.205589	CALD1		6.77329e-86	-0.0303264	NIPSNAP1		2.19645e-29	-0.91113	FBXL3		6.48429e-23	-0.963332	PPME1		5.63539e-22	-1.219	MCTS1		2.71576e-23	-1.21534
594	SLC39A4		7.00406e-81	-0.469356	CSNK2B		1.13796e-70	-0.205557	RAD23B		9.19277e-86	-0.0301084	STK32A		2.57368e-29	-0.909175	SKIV2L		6.99083e-23	-0.962542	BCL9		5.70991e-22	-1.21596	C11orf96		2.71837e-23	-1.21346
595	NCBP2		7.2582e-81	-0.468742	DNAAF3		1.32834e-70	-0.205424	NDUFB11		1.54155e-85	-0.0299535	ZNF146		2.64017e-29	-0.908844	CYP2U1		7.31286e-23	-0.962031	GABARAPL1		5.85052e-22	-1.21499	KIF22		2.7714e-23	-1.21131
596	FAM207A		7.26041e-81	-0.467406	CANT1		1.43068e-70	-0.204712	ASRGL1		2.05788e-85	-0.0298943	CCDC137		2.66202e-29	-0.907568	HECW2		7.31286e-23	-0.960903	GPR89A		6.07522e-22	-1.21376	SCD5		2.87658e-23	-1.20954
597	HLA-C		9.79852e-81	-0.466358	APH1A		1.71993e-70	-0.202378	SIPA1		3.24366e-85	-0.0298634	AARSD1		2.86752e-29	-0.907146	VMP1		7.49805e-23	-0.960724	TJP1		6.40172e-22	-1.21343	DNAJC18		2.90317e-23	-1.20808
598	MICAL2		9.84005e-81	-0.465464	PTPN12		1.7961e-70	-0.202315	C7orf50		4.04437e-85	-0.0297107	PRMT3		3.1221e-29	-0.906911	UQCC2		8.11938e-23	-0.957182	DIAPH2		6.62255e-22	-1.21051	DDX56		3.06101e-23	-1.20755
599	RPL14		9.93601e-81	-0.465407	PPP1R14C		1.83598e-70	-0.201999	TAPBP		5.05398e-85	-0.0295921	PRICKLE2		3.27852e-29	-0.906118	HPCAL1		8.25005e-23	-0.955405	TIMM8A		7.1349e-22	-1.20695	PPIF		3.10958e-23	-1.20652
600	EIF4G1		1.21328e-80	-0.464767	CHMP4B		2.42667e-70	-0.201926	CFAP126		7.73773e-85	-0.0295709	CNPY2		3.52141e-29	-0.905075	ANKRD22		9.05304e-23	-0.953668	NVL		7.52866e-22	-1.20582	RAB14		3.14178e-23	-1.20578
601	CTSA	Prognostic genes	1.67475e-80	-0.464387	CLIC3		2.68872e-70	-0.201121	IFI44L		8.80232e-85	-0.0294123	CFL2		3.72131e-29	-0.904969	DECR2		9.468e-23	-0.952845	CCDC170		8.9246e-22	-1.20445	DNAJA3		3.34403e-23	-1.20445
602	CYCS		1.74658e-80	-0.464055	TTLL7		2.726e-70	-0.200923	ACBD3		9.03369e-85	-0.0293103	SMPDL3B		4.00207e-29	-0.903625	DDX55		9.56051e-23	-0.952196	TIMELESS		9.11444e-22	-1.20238	DDX55		3.47191e-23	-1.2011
603	SFTPD		2.23652e-80	-0.46396	IPO7		3.40012e-70	-0.200569	ETV4		9.72255e-85	-0.0291868	URB1		4.04539e-29	-0.901157	EID1		9.72632e-23	-0.951087	MTX2		9.1274e-22	-1.19739	HMGN1		3.48914e-23	-1.19882
604	ERRFI1		2.80299e-80	-0.463591	MYOF		3.59014e-70	-0.200532	TRAF4		1.26346e-84	-0.029157	UTP6		4.16914e-29	-0.901149	HSPE1		9.76437e-23	-0.950622	HECW2		9.45265e-22	-1.19724	GORAB		3.62818e-23	-1.19742
605	TMEM54		2.96941e-80	-0.462461	C14orf132		3.99732e-70	-0.19986	TANC2		1.81569e-84	-0.0291528	HYOU1		4.72796e-29	-0.899544	UBE2O		9.94629e-23	-0.950334	ROPN1L	Prognostic genes	9.45265e-22	-1.19722	RABIF		4.23088e-23	-1.19734
606	ARPC1A		4.91219e-80	-0.461897	SEC61A1		4.62333e-70	-0.199177	PRSS23		2.03441e-84	-0.0291256	EIF3B		4.73063e-29	-0.898828	PUS1		1.06444e-22	-0.949973	DDX56		9.49068e-22	-1.19714	CD302		4.40158e-23	-1.19599
607	MACC1		5.93574e-80	-0.46184	UBE2I		4.77411e-70	-0.19769	ZNHIT1		2.65587e-84	-0.029111	REEP6		4.97324e-29	-0.897706	TSPAN12		1.13697e-22	-0.949921	CTHRC1		9.70963e-22	-1.19642	COPS7B		4.45144e-23	-1.19596
608	ITGA1		1.17336e-79	-0.461681	BCL2L15		4.84485e-70	-0.1972	NDUFB2		5.13906e-84	-0.0290593	S100A2		5.09124e-29	-0.896724	ZNF217		1.15182e-22	-0.948796	SLC5A6		9.94343e-22	-1.1959	FBXL3		4.48524e-23	-1.19455
609	CREB5		1.64898e-79	-0.461642	CAPS		6.13695e-70	-0.197041	WDR45B		5.9956e-84	-0.0289698	BIK		5.16626e-29	-0.896647	SHMT2		1.1646e-22	-0.947773	TTYH3		1.0487e-21	-1.19579	TBC1D9		4.81992e-23	-1.19401
610	TTN	Known disease genes	1.72639e-79	-0.461401	HSD17B1		6.78709e-70	-0.196989	GPX3		6.15559e-84	-0.0288984	AGR2		5.95504e-29	-0.896406	FAM98A		1.17599e-22	-0.94571	IARS2		1.05978e-21	-1.1957	STX2		4.90796e-23	-1.19369
611	DAP3		1.92171e-79	-0.461357	EGFL7		1.11381e-69	-0.196824	EIF3I		7.57549e-84	-0.028653	LSR		6.21526e-29	-0.896218	MSMO1		1.23334e-22	-0.945446	NFATC1		1.09354e-21	-1.19558	INTS7		4.91414e-23	-1.19359
612	DPY19L1		2.13088e-79	-0.460788	CCT6A		1.37255e-69	-0.1968	YWHAB		8.47622e-84	-0.0285695	TUBG1		6.33995e-29	-0.894051	ALG3		1.3139e-22	-0.945151	STX7		1.11225e-21	-1.19541	FBXO32		4.97798e-23	-1.19023
613	AGER		2.41628e-79	-0.460351	PGLS		1.52539e-69	-0.196166	ENAH		1.23524e-83	-0.0284737	TNFSF12		6.47366e-29	-0.893998	FLVCR1		1.35749e-22	-0.944004	NOL10		1.11423e-21	-1.19363	PFKP		5.4221e-23	-1.18834
614	SVIP		2.94882e-79	-0.459813	C5orf49		1.55355e-69	-0.195955	YKT6		1.24501e-83	-0.0283757	MAST2		6.48938e-29	-0.893177	WWTR1		1.54507e-22	-0.943654	ADCY9		1.16246e-21	-1.19228	SMARCA5		5.43564e-23	-1.18748
615	SSR2		3.05938e-79	-0.459152	ZNF581		2.05653e-69	-0.195291	PSMB2		2.06631e-83	-0.0281708	CSTF3		6.5038e-29	-0.892791	FBXO32		1.5464e-22	-0.942606	SMARCA2		1.25158e-21	-1.18952	DAB2		5.72422e-23	-1.18669
616	SAMD4B		4.39991e-79	-0.457742	RBM8A		2.17395e-69	-0.194099	RPL6		3.41904e-83	-0.028003	DOLPP1		6.99092e-29	-0.89137	ZHX3		1.5464e-22	-0.941297	VAMP3		1.26374e-21	-1.1891	TAF1D		6.09133e-23	-1.18484
617	DBI		9.23778e-79	-0.457641	ABHD17C		2.46409e-69	-0.193363	MRPS15		4.49681e-83	-0.0279891	MRPL9		7.31694e-29	-0.889146	FUT3		1.58512e-22	-0.940108	B4GALT2		1.26919e-21	-1.18869	NAA40		6.35486e-23	-1.18469
618	ZDHHC9		1.16643e-78	-0.456879	CCDC47	Prognostic genes	2.64771e-69	-0.192851	PRR29		4.80343e-83	-0.0279537	TRAF5		7.33944e-29	-0.88774	CLDN12		1.62725e-22	-0.938892	EID1		1.27593e-21	-1.18787	PDXDC1		6.80859e-23	-1.18438
619	HNRNPA3		2.50866e-78	-0.45432	SPAG17		4.75432e-69	-0.191753	TRAM1		5.66322e-83	-0.0279255	GPI		8.06775e-29	-0.88624	BRI3BP		1.69115e-22	-0.938233	LPGAT1		1.31337e-21	-1.18586	PDCD6		6.90719e-23	-1.17721
620	DCBLD2		4.1581e-78	-0.453311	ACBD3		5.26084e-69	-0.191708	GRN		6.66539e-83	-0.0278879	POLR2D		9.24286e-29	-0.884401	TRIP13		1.74146e-22	-0.937761	SFXN4		1.32315e-21	-1.18561	MYRF		6.92878e-23	-1.17702
621	DCAF12		6.17254e-78	-0.452539	VSIG1		6.73836e-69	-0.191185	HSPE1		7.01191e-83	-0.0278847	KRTCAP2		9.41227e-29	-0.884027	MITF		1.8224e-22	-0.936448	NCF1		1.33304e-21	-1.18557	BOP1		7.54605e-23	-1.17569
622	CCDC167		8.21058e-78	-0.451624	MICALL2		6.80045e-69	-0.190445	CXXC5		8.18074e-83	-0.0278086	C11orf24		9.69571e-29	-0.884012	DAB2		1.86749e-22	-0.936402	SUSD6		1.48882e-21	-1.18381	GAPDH	Known disease genes / Prognostic genes	8.0559e-23	-1.17502
623	COX5B		1.66492e-77	-0.451602	SUB1		6.85074e-69	-0.189719	MX1		8.1984e-83	-0.0277711	PTGFRN		9.90314e-29	-0.882254	IARS2		1.91465e-22	-0.93509	SLCO4C1		1.51927e-21	-1.1833	AATK	Known disease genes	8.14668e-23	-1.17459
624	SRPX2		2.62567e-77	-0.450371	OST4		9.69265e-69	-0.189362	EFHC1		1.69069e-82	-0.027769	ZDHHC9		1.02264e-28	-0.878833	GORAB		1.93342e-22	-0.934942	PAFAH1B1		1.53287e-21	-1.1832	ZMYND19		8.47383e-23	-1.17381
625	CAPZB	Prognostic genes	3.08917e-77	-0.448583	MAL2		1.08947e-68	-0.189327	SPATA18	Prognostic genes	3.21656e-82	-0.027713	LRRC59		1.07045e-28	-0.875557	ARHGAP30		2.17531e-22	-0.93388	SERTAD1		1.66922e-21	-1.18168	SIX1		8.6335e-23	-1.17374
626	FKBP3		3.31765e-77	-0.44843	C19orf33		1.48023e-68	-0.189289	SLC22A31		3.44471e-82	-0.027701	RAP1A		1.12764e-28	-0.874562	PHLDA2		2.18666e-22	-0.933169	AP1S2		1.71578e-21	-1.18064	FBXO7		8.97916e-23	-1.17338
627	IFT27		3.44622e-77	-0.447842	STMND1		1.86369e-68	-0.188809	WFDC3		4.3495e-82	-0.0276938	LRRFIP1		1.14318e-28	-0.873881	TMEM132A		2.26151e-22	-0.932547	GALC		1.74363e-21	-1.18039	PIK3R1		9.18105e-23	-1.1729
628	SECISBP2L		3.54022e-77	-0.447312	TOMM20		2.35872e-68	-0.188435	CD2AP		4.58263e-82	-0.0276637	LPAR2		1.15905e-28	-0.873794	SECISBP2L		2.32017e-22	-0.931228	NT5DC1		1.81349e-21	-1.1793	AQP1		9.7611e-23	-1.17229
629	RPL4		4.08301e-77	-0.447064	TMEM30A		2.48247e-68	-0.188199	UBB	Prognostic genes	7.33057e-82	-0.0275522	PID1		1.16132e-28	-0.872958	ENO1	Known disease genes	2.34011e-22	-0.92546	TSPAN14		1.8199e-21	-1.17858	PODXL		9.95255e-23	-1.16846
630	C5orf49		4.91136e-77	-0.444676	CASP4		2.78516e-68	-0.1876	C1QA		7.36099e-82	-0.0275219	MUC20		1.16277e-28	-0.86987	BAIAP2L1		2.45555e-22	-0.924679	SULT1A1		1.94578e-21	-1.17604	SMUG1		1.02516e-22	-1.16808
631	LFNG		5.11427e-77	-0.444151	KCNK5		3.51174e-68	-0.187109	ELF3		7.36099e-82	-0.0274501	TIMM17A		1.22664e-28	-0.869038	DPH2		2.56874e-22	-0.923777	THRA		2.02256e-21	-1.17297	MAFF		1.02799e-22	-1.16572
632	ICAM1		7.41674e-77	-0.443678	AK4		4.38139e-68	-0.186825	ABRACL		9.19585e-82	-0.0273089	HMBS		1.23133e-28	-0.864752	NFIX		2.67918e-22	-0.920585	SSH2		2.18732e-21	-1.17173	PIK3IP1		1.03258e-22	-1.16443
633	EPHX1		9.69894e-77	-0.443451	UBALD2		4.6158e-68	-0.186309	PARP1		1.4173e-81	-0.0270777	TTI1		1.28148e-28	-0.864284	TPPP3		2.886e-22	-0.917295	CLK2		2.32308e-21	-1.17006	ZNF107		1.04456e-22	-1.16245
634	TSPAN9		1.21491e-76	-0.442763	IFITM3		6.12779e-68	-0.185947	AP3S1		1.94574e-81	-0.0270413	NOP2		1.30792e-28	-0.864197	MFSD2A		2.89999e-22	-0.916147	ECT2		2.36068e-21	-1.16738	PABPC1L		1.1269e-22	-1.16045
635	CCT3		1.4952e-76	-0.442234	CCNJL		6.47532e-68	-0.184869	RSPH4A		4.18943e-81	-0.0269629	BCS1L		1.34401e-28	-0.863964	NAA40		3.06086e-22	-0.915874	CXCL2		2.46158e-21	-1.16656	HSPE1		1.18099e-22	-1.15934
636	MX1		1.56701e-76	-0.440795	MAP1A		7.04727e-68	-0.184632	COL6A2		4.31628e-81	-0.0269385	KCTD13		1.36805e-28	-0.86304	FGFR2	Known disease genes	3.17637e-22	-0.915209	EMP1		2.47351e-21	-1.16484	MSMO1		1.20163e-22	-1.15735
637	MPRIP		1.84681e-76	-0.44063	SRM	Known disease genes	7.22496e-68	-0.184554	MRPL55		6.49302e-81	-0.0269168	NOL11		1.44642e-28	-0.862058	LONRF1		3.1993e-22	-0.914988	IFNGR1		2.68993e-21	-1.16375	LAD1		1.21797e-22	-1.15684
638	TMEM258		2.01819e-76	-0.440167	PSMB8		9.75483e-68	-0.184067	CMTM3		7.21014e-81	-0.0268622	FRY		1.5239e-28	-0.862013	TBC1D9		3.43343e-22	-0.914697	UST		2.74785e-21	-1.1612	SH3D19		1.23539e-22	-1.1565
639	FAM50A		4.54323e-76	-0.44015	EGLN3		1.10271e-67	-0.183561	TMC6		7.92207e-81	-0.0267899	HOOK1		1.6125e-28	-0.861796	ADAM8		3.45464e-22	-0.914178	RFWD3		2.86975e-21	-1.16114	NFS1		1.36948e-22	-1.15454
640	EMB		5.5687e-76	-0.439747	METTL7B		1.1303e-67	-0.182918	PARP14		1.09404e-80	-0.026777	TFPI2		1.62137e-28	-0.861549	IBA57		3.49994e-22	-0.913224	PLEKHA8		3.08962e-21	-1.16036	ILF2		1.3985e-22	-1.15419
641	CPE		7.6097e-76	-0.439616	ARMC3		1.2986e-67	-0.18173	PHB		1.10309e-80	-0.0267305	NTN4		1.65634e-28	-0.860738	PPIF		3.50531e-22	-0.912456	SNRPE		3.49484e-21	-1.15796	BRI3BP		1.46437e-22	-1.15411
642	CLCF1		7.73824e-76	-0.438279	UBAP1		1.31074e-67	-0.181403	TMEM258		2.05852e-80	-0.0267156	FARSB		1.78815e-28	-0.860627	TAF1D		4.14226e-22	-0.911623	IRAK1BP1		3.6059e-21	-1.15659	DCN		1.4939e-22	-1.15375
643	RPL39L		1.11269e-75	-0.438106	HNRNPC		1.39002e-67	-0.181226	NDUFB7		2.15581e-80	-0.0266703	LIG3		2.1467e-28	-0.860578	TRAK2		4.40022e-22	-0.91033	ZWINT		3.9718e-21	-1.15566	TMEM164		1.58996e-22	-1.1522
644	YWHAG	Prognostic genes	1.47787e-75	-0.438083	SMARCA4		1.5363e-67	-0.181145	ARMC3		2.44335e-80	-0.0265919	IGFBP3		2.20449e-28	-0.858643	PDCD6		4.48295e-22	-0.907001	CCT5	Known disease genes	4.40889e-21	-1.15479	FHL2		1.67827e-22	-1.15209
645	MRPL52		1.87276e-75	-0.436044	IFITM10		1.68248e-67	-0.18059	SEMA4B		2.69697e-80	-0.026519	PRDX4		2.21404e-28	-0.858584	RAB14		4.50165e-22	-0.90644	TLCD2		4.43688e-21	-1.15161	ULK2		1.68955e-22	-1.14819
646	CFAP57		2.12731e-75	-0.435574	TMEM106B		2.15424e-67	-0.179959	STK33		2.73706e-80	-0.026492	SIRT7		2.24737e-28	-0.858512	UTP6		4.59045e-22	-0.905784	STX1A		4.57919e-21	-1.1516	TYROBP		1.69869e-22	-1.14662
647	FAM83A		4.04409e-75	-0.435472	NUDT1		2.19696e-67	-0.178996	FAAP20		3.75332e-80	-0.0263298	DUOX1		2.4837e-28	-0.857379	SMARCA5		4.89718e-22	-0.904676	NET1		4.61963e-21	-1.15033	PHLDB2		1.71239e-22	-1.14624
648	MRPS33		4.04565e-75	-0.435446	FBLIM1		2.41932e-67	-0.178968	HLA-C		6.33258e-80	-0.0262179	DHRS13		2.81519e-28	-0.85531	FUT8		4.92226e-22	-0.903773	DNAJA3		4.88977e-21	-1.14986	GRTP1		1.72064e-22	-1.14539
649	FAM174A	Prognostic genes	6.05718e-75	-0.435351	TLCD1		2.52926e-67	-0.176267	SPEF1		6.62197e-80	-0.0260649	NPLOC4		2.86529e-28	-0.854336	CP		4.97708e-22	-0.90356	ENO1	Known disease genes	5.35368e-21	-1.1484	SEMA4B		1.72094e-22	-1.14502
650	YWHAB		6.3923e-75	-0.435125	TSR3		2.63999e-67	-0.175752	TMEM50A	Prognostic genes	6.94465e-80	-0.0260469	AIMP2		2.96954e-28	-0.854303	GNG11	Known disease genes	5.01336e-22	-0.903406	QDPR		5.37148e-21	-1.14453	TSPAN12		1.76076e-22	-1.14489
651	APEX1	Known disease genes	7.1042e-75	-0.434147	LRIF1		2.78519e-67	-0.173725	MACC1		7.14156e-80	-0.026002	CPOX		3.16673e-28	-0.851936	SUSD6		5.25041e-22	-0.901291	THSD4		5.81058e-21	-1.14443	MCOLN1		1.84332e-22	-1.14452
652	GPX4		7.72135e-75	-0.432712	MIDN		3.06963e-67	-0.173111	CAMTA1		1.14199e-79	-0.0259421	NLE1		3.19241e-28	-0.851609	TMEM164		5.44912e-22	-0.900922	RIN2		5.90764e-21	-1.14356	TJP1		1.87865e-22	-1.14273
653	EFNA5		1.17968e-74	-0.432179	RPS28		3.31969e-67	-0.171637	ADAM8		1.15628e-79	-0.0259362	NAA25		3.38999e-28	-0.851306	SLC35B1		5.55362e-22	-0.899955	CBX4		6.19412e-21	-1.14347	FAM98A		1.91128e-22	-1.14251
654	PLOD2	Prognostic genes	1.18581e-74	-0.431664	FAM83A		3.41878e-67	-0.171465	CSNK1A1		1.64754e-79	-0.0257427	ADD1		3.39725e-28	-0.850933	XPO1		6.28464e-22	-0.899245	GPT2		6.27491e-21	-1.14068	NR4A3		1.91506e-22	-1.14203
655	RSL1D1	Prognostic genes	1.81071e-74	-0.43137	HSPB1	Known disease genes	3.58689e-67	-0.170987	SLC2A1	Prognostic genes	4.11493e-79	-0.0254622	SRD5A3	Prognostic genes	3.51814e-28	-0.848201	NPNT		7.0415e-22	-0.898719	FAM184A		6.56107e-21	-1.13994	LONRF1		1.92703e-22	-1.13157
656	RPS9		2.18284e-74	-0.430972	EHBP1L1		4.72316e-67	-0.169494	RNF7		4.8815e-79	-0.0254599	TFG		3.59539e-28	-0.847114	RTKN		7.20296e-22	-0.897811	P4HB		6.58768e-21	-1.1398	DUSP1		2.11941e-22	-1.13152
657	AUP1		2.34581e-74	-0.430681	LIMK1		4.83088e-67	-0.169057	PLAUR		5.22777e-79	-0.0254155	POLR3E		3.85914e-28	-0.847091	NPLOC4		7.30712e-22	-0.897396	CDKN2B	Known disease genes	6.6096e-21	-1.13935	C1QA		2.17353e-22	-1.12866
658	ZMIZ2		2.36421e-74	-0.429838	IGBP1		5.13743e-67	-0.168845	FGGY		5.78279e-79	-0.0253783	ACBD6		3.90366e-28	-0.847003	IFNGR1		7.42724e-22	-0.897396	CPSF6		6.76487e-21	-1.13824	FBXL19		2.27657e-22	-1.1283
659	VMP1		3.42157e-74	-0.428851	OAS3		5.309e-67	-0.168613	CBX1		6.74357e-79	-0.0253296	LAPTM4B		4.48286e-28	-0.843971	ABHD11		7.48422e-22	-0.895627	NUSAP1		6.81887e-21	-1.13597	EMP1		2.29682e-22	-1.12819
660	CASP4		3.4258e-74	-0.428826	CISD2		7.75617e-67	-0.16861	HOPX		7.84373e-79	-0.0253015	COASY		4.48286e-28	-0.843522	SPDEF		7.67685e-22	-0.89523	PFKP		7.06604e-21	-1.13567	LPGAT1		2.32326e-22	-1.12722
661	MGAT4B		3.89168e-74	-0.427951	DCAF12		9.09728e-67	-0.168549	STK17A		8.01056e-79	-0.0251434	PCYOX1		4.49628e-28	-0.842807	SRD5A1		8.27416e-22	-0.894373	CDHR3		7.11043e-21	-1.13558	TTF2		2.3667e-22	-1.12585
662	ECE1		3.90963e-74	-0.427948	RAB13		9.45385e-67	-0.168285	FAM83A		1.29915e-78	-0.0250052	DLG5		4.63313e-28	-0.842715	PPFIBP1		8.66053e-22	-0.894165	EGR3		7.11748e-21	-1.13316	CPOX		2.40718e-22	-1.12486
663	KISS1		6.03329e-74	-0.427636	HMGB3		9.75043e-67	-0.167406	SVIP		1.33242e-78	-0.0248961	NSUN5		4.7225e-28	-0.841405	COL1A1		9.17363e-22	-0.892876	SGCE		7.1188e-21	-1.13166	DAB2IP		2.46091e-22	-1.12202
664	MRPL41		6.21635e-74	-0.426845	MAFG		1.00437e-66	-0.167204	SPP1	Prognostic genes	2.62611e-78	-0.0248848	EEF2KMT		4.7403e-28	-0.84119	ID4		9.23358e-22	-0.891249	LMBRD1		7.21815e-21	-1.12981	FLVCR1		2.48641e-22	-1.12171
665	HSD17B1		1.27682e-73	-0.42644	SULT1C2		1.13838e-66	-0.166605	NPM3	Known disease genes	3.3741e-78	-0.0248387	DNAJB11		4.75989e-28	-0.840967	DNAJC18		9.62929e-22	-0.891125	TAF1D		7.26241e-21	-1.12952	B4GALT3		2.54797e-22	-1.12168
666	SPAG17		1.82201e-73	-0.426387	SAMD4B		1.58636e-66	-0.166185	HSP90AB1		5.68798e-78	-0.0247451	TTC13		4.92814e-28	-0.840791	NOL11		9.75418e-22	-0.891095	MYLK		7.39337e-21	-1.12861	TTYH3		2.55237e-22	-1.11992
667	WIPI2		1.96797e-73	-0.425733	UBXN1		1.70197e-66	-0.166002	FHAD1		6.09949e-78	-0.024712	SLC35B2		5.08628e-28	-0.839792	GPC3		9.97726e-22	-0.890339	FHDC1		8.01606e-21	-1.12559	ALDH2		2.70163e-22	-1.11973
668	IFI6		1.97139e-73	-0.424689	GRN		2.40785e-66	-0.165846	CCZ1		6.87669e-78	-0.0246363	LRRC20		5.47283e-28	-0.838958	TTI1		1.05593e-21	-0.888988	SLC37A3		8.03353e-21	-1.12557	CSTF3		3.00862e-22	-1.11671
669	TGFBI		2.63924e-73	-0.424437	MUC1		2.51004e-66	-0.165733	NUDT1		7.97148e-78	-0.0246021	CPSF6		5.66311e-28	-0.836266	PABPC1L		1.1016e-21	-0.887386	HM13		8.13164e-21	-1.12465	TXNDC17		3.00966e-22	-1.1162
670	CLIC3		2.98798e-73	-0.424028	DNAH7		2.72797e-66	-0.165711	TSPAN5		8.27699e-78	-0.0245815	TCF3		6.43672e-28	-0.835613	CENPH		1.12501e-21	-0.886212	DUSP3		8.24431e-21	-1.12264	UBE2O		3.09895e-22	-1.11609
671	MRPS16		3.39854e-73	-0.422689	NPLOC4		2.96855e-66	-0.16436	IDH2		8.6266e-78	-0.024478	CRLF1		7.17669e-28	-0.834818	TTF2		1.14768e-21	-0.881978	ABCA3		8.39765e-21	-1.12216	MAST2		3.21228e-22	-1.11603
672	TPBG		4.02209e-73	-0.422576	LAGE3		3.15218e-66	-0.164333	RIIAD1		1.15908e-77	-0.0244697	ZNF623		7.27492e-28	-0.833552	EHD2		1.15707e-21	-0.881812	TFB2M		8.93076e-21	-1.12176	DPH2		3.21967e-22	-1.11474
673	TUBB4B	Prognostic genes	4.22999e-73	-0.42151	PFDN2		3.38292e-66	-0.164227	NEDD4L		2.07718e-77	-0.0244448	KIFC2		7.54681e-28	-0.831749	POLR2D		1.20524e-21	-0.880629	ARHGEF10		9.06572e-21	-1.12063	ARHGAP29		3.26213e-22	-1.11346
674	EIF2AK1	Known disease genes	4.78276e-73	-0.420775	NEDD4L		3.5498e-66	-0.160327	MRPL36		2.54052e-77	-0.0242618	LEMD1		7.59342e-28	-0.831593	CCHCR1		1.26291e-21	-0.880477	NUP155		9.19821e-21	-1.1205	BARX2		3.36738e-22	-1.11268
675	FOXJ1		4.97764e-73	-0.419054	NCBP2		4.57066e-66	-0.159816	NEK6		2.67324e-77	-0.0241538	PROS1		8.03701e-28	-0.830312	DNAJC12		1.30508e-21	-0.880169	ZNF207		9.71562e-21	-1.11941	ASNS		3.48775e-22	-1.10957
676	CTSB		5.55954e-73	-0.418093	TMEM45B		7.78873e-66	-0.159652	FOLR1		4.29184e-77	-0.0241406	CENPM		8.05967e-28	-0.830068	RAC3		1.30831e-21	-0.88015	STAT5B		9.83984e-21	-1.11849	TBC1D4		3.59298e-22	-1.10925
677	GPC4		6.51405e-73	-0.417976	EML4	Known disease genes	8.78754e-66	-0.159643	COMMD6		4.79291e-77	-0.024105	SORBS1		8.34292e-28	-0.825871	SMUG1		1.36081e-21	-0.87678	ALDH2		9.88973e-21	-1.11826	ZFP36		3.70527e-22	-1.10872
678	MEX3A		6.87772e-73	-0.417868	HTATIP2		9.24416e-66	-0.158759	FNDC3B		4.85723e-77	-0.0240661	CAD		8.52911e-28	-0.825268	CSTF3		1.38607e-21	-0.876485	CPSF3		9.9725e-21	-1.11777	CA9		4.01225e-22	-1.10831
679	MS4A15		7.2699e-73	-0.417238	DGKD		1.16943e-65	-0.157805	GTF3A		5.67876e-77	-0.0240537	WRAP73		8.73994e-28	-0.824156	RPGR		1.40527e-21	-0.874857	EIF1B		1.01562e-20	-1.11747	XPO1		4.13788e-22	-1.10807
680	KIF9		7.43305e-73	-0.417203	AP3S1		1.47236e-65	-0.157789	PHF14		5.73335e-77	-0.0240085	PUSL1		9.29779e-28	-0.824057	HSPA5		1.4987e-21	-0.873656	PIAS3		1.05467e-20	-1.11729	SCGB1A1		4.6266e-22	-1.10795
681	MAP2K2		7.43305e-73	-0.416206	ITGA1		1.47812e-65	-0.157028	RPL39L		5.79632e-77	-0.0239812	CYP27A1		9.355e-28	-0.824013	MCTS1		1.51138e-21	-0.873397	MAGI1		1.05542e-20	-1.11662	SHMT2		4.62986e-22	-1.10789
682	RCC2		7.70176e-73	-0.414568	TMEM54		1.92232e-65	-0.15638	LGR4		5.90615e-77	-0.0239305	CKAP4		9.91281e-28	-0.823768	SGMS2		1.56048e-21	-0.872892	TEF		1.06307e-20	-1.11348	ARRDC4		4.66806e-22	-1.10718
683	PTGS2		8.46876e-73	-0.414112	RAB25		2.02499e-65	-0.156256	ROMO1		6.52602e-77	-0.0238475	MX2		1.02718e-27	-0.823238	BCS1L		1.58588e-21	-0.870718	SIX4		1.09266e-20	-1.11175	MARVELD3		5.19145e-22	-1.10666
684	PLSCR1	Prognostic genes	1.01051e-72	-0.413805	RSL1D1	Prognostic genes	3.8001e-65	-0.155445	C12orf75		6.9468e-77	-0.023756	C12orf45		1.13154e-27	-0.822427	DOLPP1		1.59987e-21	-0.869719	SLC25A39		1.1374e-20	-1.11027	C12orf45		5.21861e-22	-1.10617
685	RPL3		1.11301e-72	-0.412585	MORN3		4.18864e-65	-0.15533	ICAM1		7.45871e-77	-0.0236759	PLOD2	Prognostic genes	1.13294e-27	-0.822076	TXNDC17		1.6035e-21	-0.867632	STARD7		1.18472e-20	-1.10975	CP		5.32634e-22	-1.10568
686	TMEM176A		1.26075e-72	-0.412176	TOM1L1		4.29083e-65	-0.155248	TSHZ2		9.03242e-77	-0.0236332	CCDC50		1.13915e-27	-0.81979	LRRC59		1.6232e-21	-0.86516	DCN		1.29314e-20	-1.10901	FLRT3		5.43176e-22	-1.10466
687	PLA2G10		1.47479e-72	-0.412079	PHC2		4.67918e-65	-0.154521	SMARCA4		1.00743e-76	-0.0236168	UBE2S		1.15148e-27	-0.819316	ATG16L1		1.64183e-21	-0.865058	SPATA18	Prognostic genes	1.30982e-20	-1.10846	GABARAPL1		5.73384e-22	-1.1036
688	CSNK1A1		2.35989e-72	-0.410893	STK17A		7.1761e-65	-0.153955	SLC25A6		1.17173e-76	-0.0235887	RFX2		1.16144e-27	-0.814929	SRF		1.6928e-21	-0.864767	SYNJ2BP		1.34271e-20	-1.10713	C1QB		6.07363e-22	-1.10224
689	MUC21		2.67715e-72	-0.41057	IDH2		7.66326e-65	-0.151938	DRC1	Prognostic genes	1.23329e-76	-0.0235877	TRMU		1.22225e-27	-0.813938	SLC15A2	Known disease genes	1.97375e-21	-0.863745	FKBP11	Known disease genes	1.37732e-20	-1.10711	TMEM62		6.32109e-22	-1.1022
690	CISD3		2.83141e-72	-0.409648	MRPL10		1.04804e-64	-0.151898	PFKP		1.39101e-76	-0.0235663	DSN1		1.23996e-27	-0.813593	POLR3E		1.97559e-21	-0.860723	HSPE1		1.38307e-20	-1.107	NPLOC4		6.43222e-22	-1.10156
691	SULT1C2		3.43068e-72	-0.409296	XPR1		1.15949e-64	-0.151737	CCT3		1.49298e-76	-0.0235597	CNP		1.52231e-27	-0.812427	ACBD6		2.07121e-21	-0.860652	LAD1		1.39319e-20	-1.10466	TSPAN14		6.59505e-22	-1.10005
692	RPL22L1		4.5981e-72	-0.409247	RPL41		1.2104e-64	-0.151496	KHDRBS1		1.5954e-76	-0.0235513	STOM		1.62726e-27	-0.808655	ATF3		2.07623e-21	-0.859569	ATF3		1.41746e-20	-1.10304	PAQR5		6.61721e-22	-1.09865
693	RCN1		4.96244e-72	-0.409215	NQO1		1.95934e-64	-0.15089	SPAG17		1.69444e-76	-0.0235386	HM13		1.64338e-27	-0.807573	PPP3CC		2.08762e-21	-0.859056	FANCA		1.42153e-20	-1.1023	PPP3CC		6.63644e-22	-1.09823
694	ST3GAL5		5.74129e-72	-0.409182	MT-CO2		3.38943e-64	-0.150545	ILF2		1.86615e-76	-0.0235049	CYBRD1		1.68768e-27	-0.806982	ICA1		2.14573e-21	-0.859004	OSTF1		1.50896e-20	-1.10218	ADCK5		6.87283e-22	-1.09711
695	ARL6IP5		6.59063e-72	-0.408917	CYCS		4.39003e-64	-0.150448	MRPL17		1.96458e-76	-0.0234846	ATG16L1		1.69944e-27	-0.806547	CCT5	Known disease genes	2.19715e-21	-0.856997	TBRG4		1.60148e-20	-1.10218	INSIG1		6.9523e-22	-1.09632
696	CUTA		9.02039e-72	-0.407616	MS4A15		5.49452e-64	-0.148732	MRPS33		2.33057e-76	-0.0234576	ANXA3		1.82344e-27	-0.803313	HMOX1	Prognostic genes	2.19715e-21	-0.856312	DUS1L		1.71637e-20	-1.10177	PUS1		7.41686e-22	-1.09628
697	TMUB1		9.18967e-72	-0.407452	DTX4		6.73454e-64	-0.148057	TACSTD2		3.00789e-76	-0.0234504	FAM220A		2.05299e-27	-0.802771	ZNF107		2.25365e-21	-0.855651	LMNB1	Known disease genes	1.74442e-20	-1.1016	ARHGAP30		7.5251e-22	-1.09621
698	AP2M1	Prognostic genes	9.9247e-72	-0.407133	PAICS		7.40389e-64	-0.147553	TYMP	Prognostic genes	4.45806e-76	-0.0234482	ZDHHC13		2.17284e-27	-0.79855	MICALL2		2.47503e-21	-0.855244	DYNLRB2		1.92159e-20	-1.10076	EID1		7.66154e-22	-1.09565
699	CRLF1		1.26398e-71	-0.406755	ADH1C		7.7406e-64	-0.145763	SEC61A1		9.71914e-76	-0.0233263	ARHGEF3		2.31797e-27	-0.797303	SFTPA1		2.57438e-21	-0.854392	C1QA		2.04114e-20	-1.10055	RAB8B		7.81536e-22	-1.09496
700	GOLM1	Known disease genes	1.35578e-71	-0.405727	PLA2G1B		7.77083e-64	-0.145394	SAMD4B		1.32993e-75	-0.0232997	GALNT18		2.39857e-27	-0.797296	ULK2		2.61171e-21	-0.853787	GPI		2.05001e-20	-1.09794	ANKRD22		8.40726e-22	-1.09388
701	COMTD1		1.42152e-71	-0.404683	C2		8.33429e-64	-0.144405	SBNO2		1.57327e-75	-0.0232882	E2F5		2.57915e-27	-0.796843	IL17RA		2.61319e-21	-0.852172	FCER1G		2.07755e-20	-1.09787	URB1		8.41336e-22	-1.0935
702	SDF4		1.48412e-71	-0.402486	EPHX1		1.15804e-63	-0.143334	IFNAR2		2.63988e-75	-0.0232878	RAMP1		2.69854e-27	-0.796794	BYSL		2.62462e-21	-0.850972	ARHGEF16		2.10917e-20	-1.09668	PAFAH1B1		8.78981e-22	-1.09349
703	IDI1		1.9261e-71	-0.401849	CD2AP		1.51135e-63	-0.142537	OAS1		2.90515e-75	-0.0232471	IER5L		2.89332e-27	-0.796727	SEMA4B		2.65987e-21	-0.850728	SPTAN1		2.18816e-20	-1.09614	CKS1B		8.85221e-22	-1.09243
704	SRP9		2.02691e-71	-0.401181	SMIM22		1.66088e-63	-0.142112	HOXD1		1.00851e-74	-0.0232106	WDR4		3.19057e-27	-0.79468	VAMP3		2.92871e-21	-0.849064	SNTN		2.33863e-20	-1.09338	VAMP3		9.03356e-22	-1.09234
705	ARL4A		2.07537e-71	-0.400795	SLC16A9		1.7462e-63	-0.140762	MRPL52		1.22751e-74	-0.0231964	PABPC1		3.52716e-27	-0.794301	GRTP1		2.94807e-21	-0.848729	EIF3B		2.38879e-20	-1.09289	SMARCA2		9.06666e-22	-1.09202
706	PDIA6		2.50739e-71	-0.400656	IL27RA		1.84507e-63	-0.140688	TNNT1	Prognostic genes	1.22754e-74	-0.0231948	RNPS1		3.75855e-27	-0.792951	METTL1		2.96345e-21	-0.845485	ZDHHC9		2.72794e-20	-1.09182	DECR2		9.14821e-22	-1.09011
707	ALDH3B1		3.60158e-71	-0.399615	SORL1		1.99797e-63	-0.139578	TNNC1		1.26463e-74	-0.0231442	TSKU		4.12592e-27	-0.792942	DHTKD1		3.02163e-21	-0.844327	SFTPD		2.80685e-20	-1.08949	ARMCX1		9.35712e-22	-1.08917
708	ZNF117		5.26529e-71	-0.399588	CADM1		2.19241e-63	-0.139266	PCSK1N		1.53785e-74	-0.0231441	RPE	Prognostic genes	4.16644e-27	-0.792181	CXCL16		3.04082e-21	-0.842191	CFTR		2.85046e-20	-1.08885	LRRC59		9.64903e-22	-1.08896
709	PGC		5.29075e-71	-0.399562	BNIP3		2.62869e-63	-0.139175	TMEM231		2.10426e-74	-0.023071	SPI1		4.36297e-27	-0.791569	TSPAN14		3.08213e-21	-0.840441	TFG		2.96084e-20	-1.08771	SUSD6		9.81131e-22	-1.08705
710	HOOK2		5.48858e-71	-0.399132	CDKN2B	Known disease genes	3.59032e-63	-0.138444	IRAK1	Known disease genes	3.04434e-74	-0.0230124	SERPINH1		4.89454e-27	-0.79144	ARHGAP40		3.16232e-21	-0.838938	BCL2A1		2.98268e-20	-1.08626	DHTKD1		9.8387e-22	-1.08683
711	SPA17		6.88037e-71	-0.39828	SDF2		3.87577e-63	-0.137614	ITGAV		3.64521e-74	-0.0229909	ADGRG1		5.14378e-27	-0.791016	EEF2KMT		3.19574e-21	-0.837988	SLC19A1	Known disease genes	3.05903e-20	-1.08602	UTP6		1.02857e-21	-1.08327
712	LSM8		9.59123e-71	-0.397885	TIMM9		3.9003e-63	-0.137441	EFNA5		3.66953e-74	-0.0229792	SLC37A4		5.24908e-27	-0.790963	COASY		3.20787e-21	-0.837578	TUBA4B		3.09006e-20	-1.08595	MYLK		1.0661e-21	-1.0829
713	SLC22A18AS		1.10837e-70	-0.395102	SECISBP2L		4.46121e-63	-0.137296	PAM		3.87113e-74	-0.0227703	USP12		5.25859e-27	-0.790597	ATAD3A		3.25991e-21	-0.837538	FUT2		3.14773e-20	-1.08579	APH1B		1.09375e-21	-1.08283
714	TMC6		1.28382e-70	-0.395059	PRELID1		4.48443e-63	-0.137242	HNRNPA1	Known disease genes	3.87406e-74	-0.0227562	SLC44A2		5.27703e-27	-0.788779	FLRT3		3.28442e-21	-0.837003	SHMT2		3.46062e-20	-1.08513	DUS1L		1.14301e-21	-1.08199
715	CD2AP		1.4101e-70	-0.394538	MAP3K13		4.97246e-63	-0.13672	DYNC2H1		3.97427e-74	-0.0227505	SLC6A8		5.39135e-27	-0.787743	RBMS3		3.28931e-21	-0.836417	RNPS1		3.55337e-20	-1.0849	ADAM28		1.1739e-21	-1.08081
716	CISD2		1.53842e-70	-0.394385	TUBA1C	Prognostic genes	5.22286e-63	-0.136542	SLC12A7		4.59807e-74	-0.0227317	RNF207		5.72355e-27	-0.786131	EIF3B		3.29666e-21	-0.836179	B4GAT1		3.59606e-20	-1.08467	IBA57		1.19166e-21	-1.08052
717	TFPI		2.30538e-70	-0.394287	GPC4		7.38617e-63	-0.136207	NME5		6.4274e-74	-0.0226244	OLA1		5.83346e-27	-0.785092	ADAM28		3.32717e-21	-0.835829	HSPA5		3.60265e-20	-1.08318	SRD5A1		1.19335e-21	-1.08045
718	TUBG1		2.44365e-70	-0.392367	SLC44A1		9.16323e-63	-0.13575	FHL2		1.09541e-73	-0.0225227	THUMPD2		5.87558e-27	-0.782983	CASP6		3.33092e-21	-0.835501	STK39	Known disease genes	3.69987e-20	-1.08036	HDGF		1.26094e-21	-1.08011
719	ROMO1		2.57282e-70	-0.390412	PRR29		9.81548e-63	-0.135634	SPAG6		1.5515e-73	-0.022405	ANO9		6.74996e-27	-0.782927	SLFN13		3.38093e-21	-0.83384	CDKN1C		3.86339e-20	-1.08016	LST1		1.3159e-21	-1.07993
720	BET1		2.62294e-70	-0.388835	TNFRSF18		1.03948e-62	-0.133584	CDH1		1.7999e-73	-0.0223691	DNAJC9		7.38243e-27	-0.782523	TPST2		3.38093e-21	-0.833813	ZFP36		3.93785e-20	-1.07928	PKP3		1.38614e-21	-1.07563
721	YIF1A		3.35574e-70	-0.387563	CD63		1.10724e-62	-0.133418	ADAM15		2.2892e-73	-0.0222658	BCL2L2		7.4019e-27	-0.78211	NET1		3.38589e-21	-0.832563	MOB3C		4.13623e-20	-1.078	ZC3H8		1.45058e-21	-1.07554
722	ABRACL		3.44538e-70	-0.387259	YWHAG	Prognostic genes	1.11261e-62	-0.13337	TXNRD1		2.95716e-73	-0.0222241	FOSB		7.50394e-27	-0.78206	FARSB		3.38589e-21	-0.831398	FAM13B		4.26886e-20	-1.07786	NOL11		1.45319e-21	-1.07498
723	KCNQ3		3.44538e-70	-0.386699	MAP2K2		1.23727e-62	-0.133162	REL		3.24523e-73	-0.0222169	SMIM22		8.55087e-27	-0.779534	PRMT3		3.62408e-21	-0.831111	DUSP1		4.47951e-20	-1.07645	KAZN		1.47037e-21	-1.07234
724	CDV3		3.59003e-70	-0.386544	CCDC71L		1.28078e-62	-0.131662	PPDPF		3.33022e-73	-0.0221989	PIAS1		8.64424e-27	-0.778444	EGR3		3.6323e-21	-0.831104	PPIL6		4.61124e-20	-1.07578	POLR2D		1.4865e-21	-1.07218
725	FAM136A		3.81712e-70	-0.385771	ITM2C		1.37995e-62	-0.131371	HNRNPK	Prognostic genes	4.01018e-73	-0.0221418	AKR1C2		8.94498e-27	-0.777744	ZNF331		3.7487e-21	-0.830294	NFYB		4.61149e-20	-1.07547	IFNGR1		1.51763e-21	-1.07172
726	GNA12		3.84684e-70	-0.384797	CCNL2		1.43136e-62	-0.131136	TMEM30A		4.50475e-73	-0.0221315	DTX2		1.00598e-26	-0.776791	TIMM17A		3.82353e-21	-0.829687	ETV1		4.68743e-20	-1.07457	HECA		1.5281e-21	-1.07141
727	PFDN4		3.94973e-70	-0.384569	TNFAIP8L1		1.46463e-62	-0.131024	EIF4G2		4.64173e-73	-0.0220062	CHD1L		1.01901e-26	-0.776533	ZNF146		3.94497e-21	-0.828974	PABPC1		4.90622e-20	-1.07411	FAM71A		1.53212e-21	-1.06672
728	NUDT1		4.1669e-70	-0.384343	NAP1L1		1.50942e-62	-0.130662	APEX1	Known disease genes	5.20823e-73	-0.0219501	DENR		1.10067e-26	-0.774632	ARRDC4		4.05236e-21	-0.828877	TLN1		4.91764e-20	-1.07139	ST6GALNAC2		1.56344e-21	-1.0665
729	MRPS7		5.75226e-70	-0.384196	HS6ST2		3.54248e-62	-0.130274	PPP1R14C		6.07172e-73	-0.0218997	ZC3H8		1.13761e-26	-0.774435	RNPS1		4.05685e-21	-0.828398	GNG7		5.00463e-20	-1.06961	CPSF6		1.59583e-21	-1.06616
730	CTNNBIP1		8.1356e-70	-0.384129	TYMP	Prognostic genes	3.5581e-62	-0.129827	CCDC173		7.14129e-73	-0.0218851	NUP43		1.16694e-26	-0.773195	CNP		4.32144e-21	-0.827334	B4GALT3		5.19149e-20	-1.06918	ATG16L1		1.67404e-21	-1.06602
731	HNRNPK	Prognostic genes	8.7311e-70	-0.383673	EIF4EBP1		5.06715e-62	-0.129698	C14orf132		7.70671e-73	-0.02188	DHRS11		1.20643e-26	-0.772108	WFDC3		4.39952e-21	-0.826881	ZNF146		5.44046e-20	-1.06654	SKIV2L		1.77769e-21	-1.06574
732	KRT7		9.81016e-70	-0.383384	GPR160	Prognostic genes	5.1958e-62	-0.129269	RAD23A		7.90439e-73	-0.021799	PDLIM1		1.23172e-26	-0.771497	SOCS3		4.42685e-21	-0.826645	NDNF		5.46909e-20	-1.06638	CCND2		1.78798e-21	-1.06513
733	PLP2		1.19513e-69	-0.382622	CSNK1D		6.3906e-62	-0.129219	C2		8.86633e-73	-0.0217742	GTF2IRD1		1.25643e-26	-0.771405	ATAD3B		4.46509e-21	-0.826282	EPB41L5		5.54623e-20	-1.0661	GPRIN2		1.78934e-21	-1.06297
734	IQCD		1.22217e-69	-0.382481	PON2		6.90656e-62	-0.128122	ARPC1A		1.2465e-72	-0.0217526	ALG6		1.27484e-26	-0.771239	WRAP73		4.46911e-21	-0.82246	PTRH2		5.81383e-20	-1.06421	PRMT3		1.81778e-21	-1.06286
735	PERP		1.24535e-69	-0.382478	ZNHIT3		8.16714e-62	-0.126814	SRP9		1.41957e-72	-0.0216456	LIMCH1		1.38971e-26	-0.770014	PODXL		4.61122e-21	-0.821915	RHBDL2		5.92755e-20	-1.06308	TPST2		1.84067e-21	-1.06145
736	HNRNPU		1.55024e-69	-0.382347	CCDC181		1.05399e-61	-0.125605	HNRNPU		2.73813e-72	-0.0214833	CCDC34		1.42604e-26	-0.767342	RIN2		4.6945e-21	-0.82144	RNF38		6.03681e-20	-1.06217	SFTPA1		2.00198e-21	-1.06124
737	PPP1R12B		1.82439e-69	-0.381981	TMEM51	Prognostic genes	1.07435e-61	-0.125242	TRIM47		2.87611e-72	-0.0214692	YDJC		1.43617e-26	-0.767197	CCDC137		4.77477e-21	-0.821316	R3HDM1		6.09505e-20	-1.06092	LIG3		2.10125e-21	-1.06122
738	C1orf53		2.09982e-69	-0.381947	COMTD1		1.31747e-61	-0.123234	PPP1R1B		2.89374e-72	-0.0212906	NSMF		1.51149e-26	-0.767065	ARHGEF19		4.93941e-21	-0.821025	NAT9		6.31651e-20	-1.06028	LNX2		2.26228e-21	-1.06113
739	PAPSS1		2.10047e-69	-0.381936	AMIGO2		1.32119e-61	-0.122166	BUD31		3.38909e-72	-0.0212507	HDAC1		1.51518e-26	-0.766804	LIG3		4.98767e-21	-0.82044	LAMB2		6.69646e-20	-1.05991	GMNN		2.37706e-21	-1.06018
740	DHFR		3.28436e-69	-0.381471	ESYT2		1.41867e-61	-0.122029	COX5B		3.78994e-72	-0.0212434	SNAP47		1.64988e-26	-0.76658	MRPL9		5.07157e-21	-0.819695	HELLS	Known disease genes	6.73146e-20	-1.05942	RPGR		2.6313e-21	-1.05932
741	CCDC74A		4.082e-69	-0.381366	CDK4		1.41905e-61	-0.119808	SRPK1		4.635e-72	-0.021236	FBP1		1.70403e-26	-0.766283	RUNX2		5.14141e-21	-0.819659	C1QB		6.82342e-20	-1.05941	ST14		2.79979e-21	-1.05908
742	GRB10		5.8442e-69	-0.380646	JUP		1.62578e-61	-0.119676	CASP4		5.56656e-72	-0.0209684	PAXIP1		1.74947e-26	-0.765259	BARX2		5.52589e-21	-0.819471	PLEKHH2		7.34485e-20	-1.05609	STX7		2.93442e-21	-1.05897
743	KPNB1		6.23122e-69	-0.380234	FGGY		2.23432e-61	-0.119491	NBEAL1		5.9288e-72	-0.0209584	ZNF207		1.80937e-26	-0.765126	ZNF92		5.52589e-21	-0.819224	SLC7A5		7.55645e-20	-1.05599	IARS2		2.94973e-21	-1.05767
744	HSPA5		8.8224e-69	-0.379731	MICAL2		2.24278e-61	-0.116253	MGAT4B		6.91851e-72	-0.0207995	SSR4	Prognostic genes	1.85657e-26	-0.76456	NLE1		5.56045e-21	-0.816873	RCCD1	Prognostic genes	7.77161e-20	-1.05594	ACER3		3.05176e-21	-1.05748
745	MAPKAPK2		9.03906e-69	-0.379719	S100A11		2.65931e-61	-0.115901	B3GNT3		7.0218e-72	-0.0206851	TNNT1	Prognostic genes	2.07414e-26	-0.763637	MAP3K8		5.94025e-21	-0.814153	COPS7B		8.16311e-20	-1.05529	SPTAN1		3.0521e-21	-1.05614
746	FBXO32		1.06123e-68	-0.379132	PARP1		2.71961e-61	-0.115487	KCNK6	Prognostic genes	9.12875e-72	-0.0206705	SEC24D		2.27102e-26	-0.762474	MAST2		6.04832e-21	-0.813803	UTP6		8.42132e-20	-1.05397	RASSF8		3.17831e-21	-1.05546
747	MROH6		1.06189e-68	-0.379109	LGALS3		3.09859e-61	-0.115127	FLNA		1.16898e-71	-0.0206585	TMED3		2.40477e-26	-0.759726	ACOXL		6.07123e-21	-0.813579	PPIF		9.4908e-20	-1.05336	NLE1		3.45496e-21	-1.05522
748	JUNB	Known disease genes	1.21794e-68	-0.378247	ERGIC1		4.66914e-61	-0.114868	EPHX1		1.27782e-71	-0.0205378	MZT2A		2.43349e-26	-0.759504	TBC1D4		6.31263e-21	-0.811943	BRIX1		1.03557e-19	-1.05331	CENPH		3.66125e-21	-1.05003
749	AGRN		1.2198e-68	-0.377158	TMUB1		4.70539e-61	-0.114804	FAM207A		1.34156e-71	-0.0204986	DLG3		2.73602e-26	-0.759456	SLC22A18AS		6.33157e-21	-0.811481	HSDL2		1.04492e-19	-1.05221	TIMP1		3.7826e-21	-1.04996
750	SAT1		1.39166e-68	-0.377122	STAT1		4.88752e-61	-0.113071	SGPP2		1.44369e-71	-0.0204751	ESPN		2.85377e-26	-0.759311	ASNS		6.45497e-21	-0.810912	C1orf21		1.05302e-19	-1.05155	CLDN12		3.82839e-21	-1.04968
751	CD52		1.40281e-68	-0.376957	CLTC		6.97769e-61	-0.112838	CHCHD10		1.69765e-71	-0.0203945	RNF34		2.8647e-26	-0.758645	LAPTM5		6.64998e-21	-0.810802	SKIV2L		1.11324e-19	-1.05149	BMP2		3.84269e-21	-1.04914
752	GNB1		1.59016e-68	-0.37575	STMN3		7.52643e-61	-0.109823	TPM4		2.04836e-71	-0.0203858	CXCL2		2.91685e-26	-0.758493	SMARCA2		6.87392e-21	-0.810193	HCST		1.13073e-19	-1.04979	TLN1		3.8512e-21	-1.04688
753	DYNLL2		1.78868e-68	-0.375443	ELK4		8.38041e-61	-0.109347	MRPL51		2.17526e-71	-0.0203803	DNASE1		3.35775e-26	-0.757604	CKS1B		7.93795e-21	-0.809572	COPA		1.16476e-19	-1.04695	TIMM17A		3.88995e-21	-1.04518
754	RBCK1		2.73061e-68	-0.374067	RPS20		1.05459e-60	-0.107861	GNB2		2.25501e-71	-0.0203598	SRPRB		3.54762e-26	-0.757356	AARSD1		7.99278e-21	-0.808611	OLA1		1.2437e-19	-1.04547	ZNF623		4.04531e-21	-1.04418
755	TAF1D		3.29094e-68	-0.37401	ZBTB16		1.28683e-60	-0.107615	SUN1		2.41175e-71	-0.0203556	SLC22A18		3.65363e-26	-0.755601	SASS6		8.17438e-21	-0.80674	WDR12		1.44735e-19	-1.04538	TTLL7		4.21106e-21	-1.04253
756	LTBP3		3.46882e-68	-0.37314	GNG12		1.35012e-60	-0.107345	CLIC3		3.15009e-71	-0.0203498	VPS72		3.99185e-26	-0.754752	SNAP47		8.50349e-21	-0.805072	HACD1		1.46914e-19	-1.04487	GMDS		4.31291e-21	-1.04015
757	IFITM2		3.54445e-68	-0.372182	CFAP70		1.53406e-60	-0.106761	GALNT2		3.55073e-71	-0.0202491	NFYA		4.06115e-26	-0.75368	CREB3L4	Prognostic genes	8.56132e-21	-0.804	ETV5		1.49841e-19	-1.0444	MTHFD2		4.32377e-21	-1.03913
758	FHAD1		4.47766e-68	-0.370505	LSM12		1.91112e-60	-0.106092	STMND1		4.72892e-71	-0.0202465	CLDN3		4.4792e-26	-0.753234	HDHD3		9.06284e-21	-0.803348	MEX3A		1.52486e-19	-1.04292	CEACAM1		4.64745e-21	-1.03869
759	TRAPPC3		4.48258e-68	-0.370171	TIMM13		1.96773e-60	-0.106023	PSMD11		6.39282e-71	-0.0202177	ALDOA	Known disease genes	4.6529e-26	-0.752079	PIK3R1		9.19647e-21	-0.802099	FAM98A		1.57822e-19	-1.04268	WDR46		5.19762e-21	-1.0381
760	PDAP1		6.22842e-68	-0.370109	SH3BGRL3		2.03015e-60	-0.105875	AHCYL1		6.74921e-71	-0.0201739	BRCC3		4.79341e-26	-0.751676	TFG		9.36438e-21	-0.80203	GTF3C2		1.59302e-19	-1.04219	TTI1		5.19762e-21	-1.03753
761	APOC1		1.17023e-67	-0.369956	AURKAIP1		2.30416e-60	-0.105539	NCBP2		6.91254e-71	-0.0201641	KLHL12		4.83732e-26	-0.750543	LST1		1.00034e-20	-0.801746	IL17RA		1.66899e-19	-1.04217	LTC4S		5.23602e-21	-1.0358
762	HHLA2		2.14287e-67	-0.369867	RPL5		2.61831e-60	-0.105081	ARL4A		7.1536e-71	-0.0201359	ANKZF1		5.05468e-26	-0.749958	GOLGA7B		1.05562e-20	-0.801654	CELF2		1.72404e-19	-1.04114	ZBTB16		5.24664e-21	-1.03555
763	MDH2		2.36648e-67	-0.36976	DAP3		2.64252e-60	-0.105072	DRAP1		7.44798e-71	-0.0199357	PFDN6		5.15759e-26	-0.749722	BARD1		1.05643e-20	-0.801424	EHD2		1.73043e-19	-1.03998	SCARF1		5.98483e-21	-1.03528
764	MRPL21		3.25034e-67	-0.368979	ITGAV		4.09006e-60	-0.10504	TMEM54		8.15696e-71	-0.0198972	SPRR2D		5.16246e-26	-0.748289	RDX		1.06686e-20	-0.801243	UQCC2		1.81576e-19	-1.0384	AARSD1		6.11624e-21	-1.03418
765	PTBP1		3.62355e-67	-0.368793	UBE2C		4.916e-60	-0.104208	ASPHD1		9.16943e-71	-0.0198724	RNASEH2A		6.07614e-26	-0.748075	STEAP1		1.0941e-20	-0.799262	DRC3		1.81679e-19	-1.03762	SASS6		6.13866e-21	-1.03258
766	IFI16		3.78006e-67	-0.368222	RFX3		5.1314e-60	-0.104148	AGRN		1.2865e-70	-0.0198618	SERPING1		6.73695e-26	-0.74802	URB1		1.1206e-20	-0.79911	AQP1		1.86397e-19	-1.03699	GAB2		6.14045e-21	-1.03116
767	SLC5A3		5.65874e-67	-0.368163	SIKE1		5.16058e-60	-0.103535	MUC3A		1.66447e-70	-0.01983	PHKG2		7.01184e-26	-0.745716	TTYH3		1.14568e-20	-0.798882	GBP4		2.00205e-19	-1.03594	ZNF92		6.2025e-21	-1.03034
768	POLDIP2		6.44419e-67	-0.367519	OLA1		5.25532e-60	-0.103482	STAT1		1.66447e-70	-0.0197684	DSG2		7.07956e-26	-0.745562	RAPGEF1		1.18857e-20	-0.797634	RALGPS2		2.00728e-19	-1.0358	CATSPERD		6.33069e-21	-1.03021
769	CRABP2		6.90569e-67	-0.367059	CD82		5.88942e-60	-0.102668	B9D1		1.78446e-70	-0.019684	FAM83H		7.11988e-26	-0.745375	CCDC173		1.19589e-20	-0.797302	DNAAF5		2.01485e-19	-1.03525	DUSP3		6.60003e-21	-1.02976
770	LSM4		7.38708e-67	-0.36653	TSHZ2		7.17092e-60	-0.102328	NFE2L3		2.10605e-70	-0.0196182	PDIK1L		7.30457e-26	-0.745333	FBXO7		1.29603e-20	-0.795554	FBXL5		2.07951e-19	-1.03343	STARD7		6.93448e-21	-1.02959
771	CRIP2		7.74026e-67	-0.366484	KCNQ3		8.34172e-60	-0.10192	TMEM159		2.53245e-70	-0.0194482	RRAS		7.54794e-26	-0.744695	GTF3C2		1.30056e-20	-0.794727	MID1IP1		2.12672e-19	-1.0328	CASP6		6.95689e-21	-1.02821
772	EIF2S2		9.85229e-67	-0.366464	MRPS33		1.02223e-59	-0.101915	ATP6V1F		2.56818e-70	-0.0194004	TSPAN6	Prognostic genes	7.7191e-26	-0.743573	NIPSNAP1		1.3199e-20	-0.794496	NFATC3		2.13887e-19	-1.0306	ARHGAP40		6.95689e-21	-1.02563
773	PFDN6		9.85229e-67	-0.366355	EVA1B		1.12014e-59	-0.101022	PLP2		4.01942e-70	-0.0193546	SMG7		7.7191e-26	-0.743345	KCTD13		1.42589e-20	-0.794411	KCNJ15		2.14504e-19	-1.02961	ADCY9		6.97845e-21	-1.02525
774	CHCHD10		1.43534e-66	-0.366109	EFNA4		1.15028e-59	-0.100804	DYNLL2		4.15821e-70	-0.0193277	PIGM		7.83785e-26	-0.74252	C11orf24		1.49813e-20	-0.794235	FOXN3		2.17262e-19	-1.02858	LAMB2		7.06681e-21	-1.02416
775	PHC2		1.93795e-66	-0.365728	SLC22A18AS		1.18583e-59	-0.100245	COA4		4.15821e-70	-0.0193097	CALM1		7.92072e-26	-0.741805	CPB2		1.50974e-20	-0.792743	WDR38		2.39069e-19	-1.02846	RUNX2		7.08791e-21	-1.02368
776	PSMC4		2.02437e-66	-0.365618	IFITM2		1.70537e-59	-0.100227	XIAP		4.20943e-70	-0.0193058	GTF3C2		7.95352e-26	-0.741537	SIRT7		1.51113e-20	-0.792151	NDN		2.44595e-19	-1.02802	CNPY2		7.40833e-21	-1.02303
777	AGT		2.34712e-66	-0.364006	IER5		1.89841e-59	-0.100054	YWHAG	Prognostic genes	5.1987e-70	-0.0191464	NDC1		8.11701e-26	-0.739385	HM13		1.55414e-20	-0.791164	THRB		2.46668e-19	-1.02779	PPARG		7.44607e-21	-1.02258
778	DBNL		2.41831e-66	-0.362702	C12orf45		1.9108e-59	-0.0997966	GGTLC1		9.04492e-70	-0.0190632	SLC12A4		9.38514e-26	-0.739179	PITX1		1.58932e-20	-0.790926	HYOU1		2.47553e-19	-1.02684	NAA25		7.47449e-21	-1.0203
779	TMEM134		2.89035e-66	-0.362673	MRPS15		2.73055e-59	-0.0994842	NTN4		1.07804e-69	-0.0190598	SAMHD1		9.56647e-26	-0.738824	DTYMK		1.60012e-20	-0.790782	SLC35B1		2.58472e-19	-1.02638	RIN2		7.50757e-21	-1.01805
780	HNRNPA2B1		4.41116e-66	-0.362643	STS		2.842e-59	-0.0994604	MXRA8		1.17279e-69	-0.0190295	INPP5A		1.04244e-25	-0.738775	STAT5B		1.6114e-20	-0.790702	ID3		2.64606e-19	-1.02487	WFDC3		7.82151e-21	-1.01787
781	LACTB2		4.75709e-66	-0.36231	PARP14		3.41899e-59	-0.0993144	PSMB9		1.3871e-69	-0.019018	PRIM2		1.0769e-25	-0.738206	HYOU1		1.72273e-20	-0.789222	RHNO1		2.71098e-19	-1.02332	CNFN		7.82925e-21	-1.01696
782	MRPS23		5.59805e-66	-0.362302	MLLT6		3.75311e-59	-0.0992425	STK39	Known disease genes	1.64645e-69	-0.0189745	TNS2		1.1138e-25	-0.738084	LPAR2		1.74579e-20	-0.788364	ARHGAP23		2.73968e-19	-1.02192	CDCA4	Prognostic genes	8.06889e-21	-1.01584
783	DDOST	Prognostic genes	5.89931e-66	-0.360218	PPIC		3.99399e-59	-0.0984944	RSL1D1	Prognostic genes	1.73935e-69	-0.0188247	EDN1		1.19349e-25	-0.736709	NME4		1.75441e-20	-0.788239	SMG7		2.82829e-19	-1.02173	SFTPA2		8.15927e-21	-1.01563
784	RAB38		7.91182e-66	-0.359894	NOL3		4.21805e-59	-0.0977914	GNG12		1.79488e-69	-0.0187935	MRPL19		1.20232e-25	-0.736237	DNAJB11		1.78977e-20	-0.787659	RAPGEF1		2.83419e-19	-1.02166	EHD2		8.19788e-21	-1.01465
785	NDUFB10		1.07729e-65	-0.359031	FAM234A		4.23663e-59	-0.0977528	RP1		1.88517e-69	-0.0187917	BUB3		1.22383e-25	-0.734178	MYLK		1.78977e-20	-0.786336	TIMM17A		2.99047e-19	-1.01917	CAD		8.39651e-21	-1.01365
786	TNNT1	Prognostic genes	1.10967e-65	-0.35882	XIAP		4.61602e-59	-0.0960648	CEP126		1.96978e-69	-0.0187587	KLF10		1.25783e-25	-0.734085	NSUN5		1.79955e-20	-0.78258	SERPINH1		3.03375e-19	-1.01772	FARSB		8.63361e-21	-1.00971
787	HNRNPAB		1.34639e-65	-0.358747	PIFO	Prognostic genes	4.70903e-59	-0.0958821	TES		1.97518e-69	-0.0187385	MCOLN1		1.29056e-25	-0.733756	CNFN		1.81374e-20	-0.781701	PUS7		3.05204e-19	-1.01439	NET1		8.63377e-21	-1.00717
788	CDH3	Prognostic genes	1.76649e-65	-0.358666	LACTB2		5.13934e-59	-0.0957791	CCDC47	Prognostic genes	2.26183e-69	-0.0186862	CANT1		1.32367e-25	-0.733516	GMNN		1.88168e-20	-0.781476	FGD4		3.1104e-19	-1.00929	GTF3C2		8.94177e-21	-1.00688
789	TNIP1		1.77992e-65	-0.358084	REEP3		5.18685e-59	-0.0950591	PTPRE		3.07161e-69	-0.0186408	SLC39A7		1.35339e-25	-0.732419	TUBG1		1.8909e-20	-0.781422	PGM2L1		3.1488e-19	-1.00884	STAT5B		9.29627e-21	-1.00597
790	GTF3A		1.84795e-65	-0.357979	CTSB		7.0903e-59	-0.0946566	SNCG		3.44253e-69	-0.0186247	HSP90B1		1.56827e-25	-0.731498	SLC35B2		1.8921e-20	-0.78062	FAM83A		3.16464e-19	-1.00831	C11orf97		9.4738e-21	-1.0045
791	APRT		2.33915e-65	-0.357846	NT5C3B		7.37761e-59	-0.0945034	MICALL2		3.5122e-69	-0.0183944	UTRN		1.73496e-25	-0.730705	CDCA4	Prognostic genes	1.9335e-20	-0.780066	TBC1D2		3.23084e-19	-1.00698	POLR3E		9.50505e-21	-1.0006
792	ANOS1		2.39152e-65	-0.356256	OGFRL1		7.40425e-59	-0.0943666	IPO7		5.05017e-69	-0.0183388	DROSHA		1.83098e-25	-0.729988	NOP2		2.00576e-20	-0.778794	DNAJC27	Prognostic genes	3.32563e-19	-1.00488	OLA1		9.7895e-21	-1.00028
793	STMN1		2.39152e-65	-0.356238	SRPX2		9.72495e-59	-0.094197	ANKRD36C		6.71672e-69	-0.0182922	YWHAZ		1.84712e-25	-0.729785	SORD		2.05133e-20	-0.77756	CENPL		3.33781e-19	-1.00433	MROH6		9.7895e-21	-0.999447
794	PDXK		2.84562e-65	-0.356234	IL10RB		1.2207e-58	-0.0931831	MT-ND1		7.00778e-69	-0.0182672	NABP2		1.88343e-25	-0.729404	TNFRSF18		2.13909e-20	-0.777037	UBE2O		3.34483e-19	-1.00381	SLC35B1		9.84291e-21	-0.998635
795	IFI35	Prognostic genes	3.1613e-65	-0.355862	ADAR		1.34898e-58	-0.0931771	ATOX1		7.15559e-69	-0.0182392	MPZL1		1.95911e-25	-0.727844	CPOX		2.22993e-20	-0.776526	CATSPERD		3.4075e-19	-1.0028	NT5DC1		1.01125e-20	-0.996207
796	MYDGF		3.70603e-65	-0.355564	CDC34		1.49874e-58	-0.0931311	EIF2AK1	Known disease genes	7.34085e-69	-0.0182199	ZBTB4		2.11457e-25	-0.726334	CNPY2		2.25408e-20	-0.77599	DPH3		3.75084e-19	-1.00268	CCDC167		1.03312e-20	-0.994987
797	S100A9		3.93426e-65	-0.354366	PSMD8		1.64747e-58	-0.0931135	FLOT1		9.53326e-69	-0.0181886	KAT2B		2.16976e-25	-0.726316	GPI		2.34508e-20	-0.775918	TDRD3		3.78243e-19	-1.00004	RHOV		1.0404e-20	-0.993995
798	PLGRKT		3.9729e-65	-0.353473	MRPS23		1.76761e-58	-0.0926329	ACTR2	Prognostic genes	1.10446e-68	-0.0181165	TTC28		2.26701e-25	-0.725309	PPARG		2.57259e-20	-0.775346	P3H4		3.95805e-19	-0.998949	ATAD3B		1.04825e-20	-0.992333
799	ITGB1		4.40043e-65	-0.35309	CTNNB1	Known disease genes	1.9008e-58	-0.0923436	DAP3		1.13413e-68	-0.0180218	LMO7		2.31364e-25	-0.725258	CD302		2.65401e-20	-0.77478	MAST2		4.02675e-19	-0.99823	ZNF385B		1.06624e-20	-0.992114
800	EEF2		4.47281e-65	-0.353057	PSMD11		2.13803e-58	-0.0920441	SSR2		1.41818e-68	-0.0180191	AP1S1		2.35699e-25	-0.722377	KLHL12		2.65951e-20	-0.774494	SAXO2		4.16886e-19	-0.996506	ZHX3		1.12643e-20	-0.991769
801	EI24		5.27971e-65	-0.353015	COL17A1		3.07689e-58	-0.0920255	TUBA1C	Prognostic genes	1.94229e-68	-0.0180089	C1orf56		2.44175e-25	-0.722087	FAM220A		2.68883e-20	-0.77401	LEPROT		4.29538e-19	-0.995986	ADAM8		1.16593e-20	-0.991385
802	SLC44A4	Prognostic genes	6.26024e-65	-0.35295	MALSU1		3.34927e-58	-0.091429	PGAM1	Prognostic genes	2.07278e-68	-0.017952	SRCIN1		2.46547e-25	-0.721952	NAA25		2.7165e-20	-0.771652	SLC25A10		4.31336e-19	-0.995753	SGCB		1.17705e-20	-0.990646
803	GRAMD1A		6.53091e-65	-0.352947	IRX3		3.93306e-58	-0.0910676	WDR54		2.17469e-68	-0.017858	CAPN5		2.55662e-25	-0.721452	OVOL1		2.76555e-20	-0.771496	MPZL1		4.37466e-19	-0.994891	GALC		1.17705e-20	-0.989619
804	WIPF2		6.53091e-65	-0.352515	TNFAIP2		4.60312e-58	-0.0909823	MALL		2.43818e-68	-0.0178028	FAM222B		2.57037e-25	-0.720571	ZNF623		2.95043e-20	-0.770708	CCT6A		4.42751e-19	-0.993738	SDC2		1.19386e-20	-0.989487
805	PLEC		6.57737e-65	-0.35242	DSTN		4.83001e-58	-0.0908997	DPY19L1		2.49179e-68	-0.0177436	TRIM11		2.65518e-25	-0.718003	TCF3		2.99338e-20	-0.770036	NOL11		4.52347e-19	-0.993343	LMBRD1		1.24595e-20	-0.988699
806	LRTOMT	Prognostic genes	6.57737e-65	-0.352307	ERBB2	Known disease genes	5.30325e-58	-0.0907862	CISD3		2.60245e-68	-0.0176974	TPI1	Known disease genes / Prognostic genes	2.69027e-25	-0.714974	DUOXA1		3.31624e-20	-0.769819	ALG8		4.73763e-19	-0.993142	DTYMK		1.2799e-20	-0.987612
807	MRPL20		6.7846e-65	-0.352221	SNRPB		5.61653e-58	-0.0907718	MS4A15		2.64713e-68	-0.0176622	PRPF3		2.75229e-25	-0.714649	PAFAH1B1		3.45563e-20	-0.769225	TJP2		4.76314e-19	-0.992417	DNAJC12		1.29247e-20	-0.986488
808	RHOD		7.24789e-65	-0.352207	EFHD2		5.6292e-58	-0.0901441	CAST		2.73132e-68	-0.0176517	MAGED1		2.78396e-25	-0.713913	TMEM109		3.45631e-20	-0.768629	CES1		4.99278e-19	-0.991415	SLC25A39		1.34912e-20	-0.983624
809	FAM183A		8.99567e-65	-0.352095	RALA	Prognostic genes	7.30297e-58	-0.0898997	FBXO32		3.01303e-68	-0.0175837	BDH1		2.79489e-25	-0.713549	PRR36		3.47445e-20	-0.767397	MCTS1		5.07148e-19	-0.991362	CCHCR1		1.35726e-20	-0.983376
810	MRPL32		9.1207e-65	-0.352037	PTMA		8.29952e-58	-0.0897773	C1orf43		3.2997e-68	-0.0175714	STT3A		2.79605e-25	-0.712779	AIMP2		3.4795e-20	-0.767248	ITM2B		5.13094e-19	-0.989795	ACBD6		1.5403e-20	-0.982971
811	ZDHHC18		1.29225e-64	-0.351854	GALK1		8.92277e-58	-0.0897089	EGFR	Known disease genes	5.278e-68	-0.0174836	PPP1R35		2.85587e-25	-0.712773	SMG7		3.52066e-20	-0.766374	ACP6		5.37941e-19	-0.988809	PXDC1		1.60452e-20	-0.982575
812	PPP1CA		1.43806e-64	-0.35173	VSIG2		1.17804e-57	-0.0895728	CCDC74A		6.02258e-68	-0.0174814	ZNF7		3.2477e-25	-0.712573	SLC37A4		3.54001e-20	-0.76593	CD37		5.43859e-19	-0.986264	THRA		1.61436e-20	-0.981974
813	KHDRBS1		1.6709e-64	-0.351419	FNDC3B		1.31194e-57	-0.0888843	C9orf135		7.21349e-68	-0.0174508	CTTN		3.42861e-25	-0.711892	DENR		3.77605e-20	-0.765851	YWHAZ		5.67995e-19	-0.98539	ZNF146		1.65392e-20	-0.980819
814	PSMD3		1.75716e-64	-0.351146	TPBG		1.55121e-57	-0.0882707	CNN3		7.46587e-68	-0.0173272	CHPF		3.47825e-25	-0.710319	WDR4		3.8196e-20	-0.763205	KIF22		5.7501e-19	-0.985038	AK1		1.74882e-20	-0.979994
815	TMEM176B		1.80707e-64	-0.350937	UBE2Z	Prognostic genes	1.59979e-57	-0.0876809	SOX9		9.20096e-68	-0.0173074	QPCT		3.65302e-25	-0.708953	DUSP3		3.91055e-20	-0.762538	PRDX4		5.8776e-19	-0.984804	KCTD13		1.74882e-20	-0.979877
816	MMP15		1.83283e-64	-0.35082	PDCD6		1.79717e-57	-0.0875875	JUP		9.44073e-68	-0.0172353	N4BP2L1		3.69038e-25	-0.70656	MTFR1		4.09083e-20	-0.754668	EFNB1		6.1298e-19	-0.984325	MTM1		1.83898e-20	-0.979407
817	FBXW5		1.92113e-64	-0.350635	COA4		1.96835e-57	-0.0875465	BZW2	Known disease genes	9.92634e-68	-0.0171986	SHROOM4		3.75221e-25	-0.70637	EPHB2		4.14254e-20	-0.754353	TUBA1A		6.18346e-19	-0.984281	CRBN		1.85564e-20	-0.979273
818	NPM3	Known disease genes	1.94506e-64	-0.349778	POLR2J		2.29932e-57	-0.0875402	SLC22A18		1.35858e-67	-0.017194	FBLN5		3.75221e-25	-0.70586	DUSP1		4.14254e-20	-0.754043	CXCL16		6.34743e-19	-0.982583	FAM220A		1.86595e-20	-0.97915
819	POP7		2.28295e-64	-0.349452	FAM136A		2.35138e-57	-0.0874598	MORN3		1.50908e-67	-0.0171931	FBXL6		3.75479e-25	-0.705455	HMBS		4.33831e-20	-0.754024	PCSK5		6.43727e-19	-0.981968	TMEM132A		1.87523e-20	-0.978671
820	ITM2C		2.31582e-64	-0.34907	EPCAM		3.17968e-57	-0.0864584	EPHB4		1.67796e-67	-0.0170935	KCNQ3		3.98926e-25	-0.705006	SOX12		4.38211e-20	-0.752779	MAPRE2		6.48822e-19	-0.981558	ANKZF1		1.93264e-20	-0.978246
821	MT-CO1		2.41333e-64	-0.348941	EIF4G1		3.5415e-57	-0.0864187	VSIG2		2.33958e-67	-0.0170856	DDX52		4.01079e-25	-0.704799	FCER1G		4.40961e-20	-0.751596	TMEM190		6.50318e-19	-0.980759	ALG3		1.9428e-20	-0.977968
822	PKP3		2.93708e-64	-0.347411	NMT1		3.70186e-57	-0.086185	EIF2S2		2.38996e-67	-0.0170835	MUC5B		4.20382e-25	-0.703333	TTC13		4.57722e-20	-0.751591	TMEM109		6.51468e-19	-0.979869	BCS1L		2.03933e-20	-0.977279
823	EEF1A1		3.25158e-64	-0.345331	RER1		4.05649e-57	-0.0860038	MRPL41		2.73689e-67	-0.0169362	HSD17B4		4.22387e-25	-0.702776	PAQR4		4.57994e-20	-0.751303	SORT1		6.51468e-19	-0.979629	NIFK		2.04081e-20	-0.976333
824	MAGED1		3.28906e-64	-0.345072	RDH10		4.14747e-57	-0.0855985	CCNL2		3.56934e-67	-0.0169223	TTC39C		4.48884e-25	-0.7025	DNAJC9		4.60047e-20	-0.750823	IGFBP3		6.75042e-19	-0.979157	ZNF331		2.11411e-20	-0.975879
825	TEKT2		3.45859e-64	-0.344428	ILF2		4.43649e-57	-0.0852595	TSR3		3.64431e-67	-0.0168355	NEBL		4.54849e-25	-0.700775	ACER3		4.60047e-20	-0.750059	EMP3		7.10081e-19	-0.978835	RPE	Prognostic genes	2.11438e-20	-0.975254
826	MX2		4.08312e-64	-0.344115	CD47		4.59437e-57	-0.0846513	LSM8		4.38431e-67	-0.0167402	PLPP5		4.82696e-25	-0.700698	CPSF6		4.73151e-20	-0.749376	COPB2		7.42662e-19	-0.976671	ZNF207		2.33336e-20	-0.974316
827	ATOX1		4.26087e-64	-0.343216	AHDC1		4.59951e-57	-0.0843217	BIRC3		4.65033e-67	-0.016715	MTMR4		4.84655e-25	-0.700544	RPL39L		5.18726e-20	-0.74925	TMED3		7.51798e-19	-0.9764	MEST		2.43696e-20	-0.972548
828	SYF2		5.12069e-64	-0.342908	FHL2		6.31374e-57	-0.0841563	CP		5.29118e-67	-0.016681	KIAA1522		4.91092e-25	-0.700453	LPL		5.26954e-20	-0.749191	DNAJB11		7.82944e-19	-0.975059	CCNO		2.54106e-20	-0.971291
829	SLC46A2		5.77115e-64	-0.342392	MRPS16		6.84832e-57	-0.0839924	BNIP3		5.37395e-67	-0.0166386	HSF4		4.98096e-25	-0.699336	HECA		5.35105e-20	-0.748472	TAPT1		8.15671e-19	-0.974072	CCDC173		2.60425e-20	-0.970579
830	XPR1		5.9256e-64	-0.341839	SNRPG	Known disease genes	7.08489e-57	-0.0826458	ARNT2		5.77862e-67	-0.0165888	DAP		4.99939e-25	-0.699251	KRTCAP2		5.5794e-20	-0.747362	CNP		8.32496e-19	-0.973507	MB		2.63929e-20	-0.969936
831	IDH2		7.33192e-64	-0.341812	PROM1		8.9347e-57	-0.0825265	DEK		6.67078e-67	-0.0165191	NIFK		5.03437e-25	-0.698701	DHRS13		5.65244e-20	-0.745901	C1orf194		8.32496e-19	-0.97323	IL11RA		2.76538e-20	-0.969335
832	MRPS34		7.43601e-64	-0.341671	MRPS7		9.21024e-57	-0.0814302	PRDX5		6.96033e-67	-0.016348	RBM28		5.17766e-25	-0.696385	GMDS		5.87382e-20	-0.744468	CLDN12		8.80189e-19	-0.972999	DOLPP1		2.97626e-20	-0.969261
833	NDUFA12		7.91797e-64	-0.341607	GAA		1.07735e-56	-0.0812547	CHL1		8.68576e-67	-0.0163398	MTX1		5.58046e-25	-0.695156	PLLP		5.993e-20	-0.744221	TMOD3		9.09625e-19	-0.971837	RNPS1		3.15762e-20	-0.969186
834	DTX3L		9.92227e-64	-0.341349	CISD3		1.2e-56	-0.0811629	TMEM51	Prognostic genes	8.79344e-67	-0.016322	TSPYL1		5.81668e-25	-0.695016	SSH2		6.0497e-20	-0.743748	SGK1		9.23201e-19	-0.971366	TFG		3.35092e-20	-0.968482
835	PIGS		1.25424e-63	-0.340387	LSM5		1.22299e-56	-0.0809207	MARCO		1.30652e-66	-0.0163158	FKBP3		5.84693e-25	-0.692617	AK4		6.76891e-20	-0.743501	ARID5A		9.68052e-19	-0.97131	TRIT1		3.36137e-20	-0.967619
836	VSIG2		1.42315e-63	-0.340282	POLDIP2		1.52071e-56	-0.079974	CAP1		2.07818e-66	-0.0162714	COPB2		5.88464e-25	-0.69257	C12orf45		6.82878e-20	-0.741971	PSMG3		9.90316e-19	-0.970668	THUMPD2		3.4665e-20	-0.967528
837	BIRC3		1.42833e-63	-0.339856	PID1		1.68601e-56	-0.0798937	PTGS2		2.63596e-66	-0.0162567	IRF7		6.04536e-25	-0.692491	HDAC1		7.21739e-20	-0.738867	PARVB		1.01927e-18	-0.970212	BEST1		3.59784e-20	-0.967157
838	TMEM30A		1.4396e-63	-0.338839	SLC16A11		1.88875e-56	-0.0797187	SRM	Known disease genes	2.69233e-66	-0.0162415	DEPTOR		6.13107e-25	-0.69207	THUMPD2		7.24875e-20	-0.738007	DHCR24		1.03104e-18	-0.9702	GTF2IRD1		3.61862e-20	-0.965475
839	BCL3		1.46494e-63	-0.338422	CAPRIN1		1.98714e-56	-0.0795718	EFCAB10		3.3615e-66	-0.0162211	C8orf76		6.42272e-25	-0.691255	CCDC167		7.7974e-20	-0.737488	CAPSL		1.04026e-18	-0.969788	FUT8		3.63356e-20	-0.965474
840	SOX9		1.8492e-63	-0.338375	TNNT1	Prognostic genes	2.01695e-56	-0.079494	SEC61B		3.59176e-66	-0.0162032	FUBP1		7.37933e-25	-0.689224	RPE	Prognostic genes	8.18049e-20	-0.737195	CASP1		1.0566e-18	-0.968354	MTURN	Prognostic genes	3.90585e-20	-0.96509
841	PLAUR		2.43146e-63	-0.338218	SLC39A4		2.25945e-56	-0.0789471	MRPS16		3.63813e-66	-0.0162003	COPA		7.66566e-25	-0.688574	CAD		8.19838e-20	-0.736721	C8orf34		1.09444e-18	-0.967601	CCT5	Known disease genes	4.1102e-20	-0.964646
842	ARF1		2.44646e-63	-0.337664	NNMT		2.27363e-56	-0.0789197	ATP10B		3.64329e-66	-0.0161641	NKRF		8.30647e-25	-0.683467	PTGFRN		8.27018e-20	-0.734832	POLR2D		1.10495e-18	-0.967134	RTKN		4.23201e-20	-0.964127
843	TMEM51	Prognostic genes	3.56211e-63	-0.337475	ZNF217		2.6979e-56	-0.0789046	POLR2I		5.15355e-66	-0.01611	PDIA6		8.41127e-25	-0.682771	RNF34		8.41853e-20	-0.734635	MS4A8		1.13163e-18	-0.967106	HM13		4.32215e-20	-0.963621
844	CNPY2		4.02826e-63	-0.337314	CTHRC1		3.07996e-56	-0.0784732	IGBP1		5.30498e-66	-0.0161089	ZNF587		8.93263e-25	-0.682589	LNX2		8.51361e-20	-0.732957	WDR46		1.13862e-18	-0.966394	BARD1		4.32403e-20	-0.962367
845	CAP1		4.89023e-63	-0.336585	LDOC1		3.25308e-56	-0.0784354	DNAAF3		5.33272e-66	-0.0160765	ZBTB41		9.01292e-25	-0.682162	TRMU		8.71281e-20	-0.732759	MPDZ		1.18406e-18	-0.964476	CENPM		5.00631e-20	-0.961933
846	DTYMK		5.27197e-63	-0.336254	MRPL52		4.1465e-56	-0.0777986	CFAP70		5.5556e-66	-0.0160629	ENC1		9.13013e-25	-0.681688	PAXIP1		9.0142e-20	-0.732719	PDK1		1.24429e-18	-0.963557	PRDX4		5.84845e-20	-0.961035
847	METTL7A		5.70325e-63	-0.336207	MAPK13		4.22904e-56	-0.0777564	EIF4G1		6.43464e-66	-0.0159168	PRKDC	Known disease genes	9.59445e-25	-0.680675	ARAP2		9.0295e-20	-0.729615	DENR		1.25408e-18	-0.962332	SSH2		5.91912e-20	-0.958694
848	UBA2		6.05634e-63	-0.335431	MSMO1		4.6841e-56	-0.0775504	IFI44		6.9703e-66	-0.0159096	CAPN12		9.70434e-25	-0.67992	MTHFD2		9.33901e-20	-0.728292	ECE2		1.29112e-18	-0.962057	OSTF1		5.92746e-20	-0.957085
849	MEA1		6.45047e-63	-0.334877	DHRS7		7.68104e-56	-0.0768593	CISD2		7.55902e-66	-0.0158699	PPIL1		1.15728e-24	-0.679901	CHD1L		9.41081e-20	-0.724217	MGME1		1.41288e-18	-0.960378	TEX14		6.14192e-20	-0.956838
850	TIMM9		8.26536e-63	-0.334739	SNX9		1.26253e-55	-0.07674	OLA1		8.41564e-66	-0.0158337	HSD17B6		1.26042e-24	-0.678706	CCL2		9.79724e-20	-0.723406	EFNB2		1.48725e-18	-0.959806	TUBA1A		6.89955e-20	-0.956155
851	BUD31		8.98942e-63	-0.334134	CCDC6		4.12174e-55	-0.0764664	IRX3		8.62621e-66	-0.0157706	ACTL6A		1.29766e-24	-0.678352	GTF2IRD1		1.01742e-19	-0.722721	B3GNT3		1.51525e-18	-0.959297	ARHGEF37		8.04359e-20	-0.955911
852	YIPF2		9.86388e-63	-0.332376	FLNA		4.38523e-55	-0.0762884	NRP1		9.60485e-66	-0.0157505	UBL3		1.30669e-24	-0.677661	OSTF1		1.02554e-19	-0.721896	HDAC1		1.59635e-18	-0.958507	PAXIP1		8.18747e-20	-0.955494
853	OLA1		1.2025e-62	-0.331602	PHB		4.42809e-55	-0.0759658	MT-CO3		1.00965e-65	-0.0157327	ARRB2		1.31887e-24	-0.677018	DSN1		1.08133e-19	-0.721887	LIPA		1.70471e-18	-0.958118	KLHL12		8.24703e-20	-0.953345
854	EFHD2		1.29678e-62	-0.331121	NHSL1		5.11409e-55	-0.0759132	LGI3		1.26825e-65	-0.0156313	SRM	Known disease genes	1.46089e-24	-0.674424	RHPN1		1.09676e-19	-0.721784	CADM1		1.71701e-18	-0.957952	MTFR1		8.31048e-20	-0.952482
855	PSMA2		1.31709e-62	-0.331062	RPL26		5.68814e-55	-0.0755121	XPR1		1.35945e-65	-0.0155572	NELFCD		1.52163e-24	-0.67377	STARD7		1.11833e-19	-0.72127	CSTF3		1.80891e-18	-0.957868	ZDHHC9		8.58043e-20	-0.951384
856	ACOT13		1.37988e-62	-0.330332	GZMB		5.9606e-55	-0.0754628	CSNK1D		1.55371e-65	-0.0155099	SLC9A7		1.58158e-24	-0.673225	ALG6		1.17675e-19	-0.720812	SRPRB		1.81394e-18	-0.957576	WRAP73		8.73915e-20	-0.951199
857	MPZL1		1.39868e-62	-0.32905	SPATS2L	Prognostic genes	6.05671e-55	-0.0749851	UBALD2		3.28608e-65	-0.0154476	PGAM5		1.61726e-24	-0.673033	ARMCX1		1.1863e-19	-0.719907	FERMT1		1.8235e-18	-0.957068	NDNF		9.02122e-20	-0.950209
858	METTL5		1.49472e-62	-0.328928	SLC12A7		6.72351e-55	-0.0748458	MAP1A		5.33746e-65	-0.0154209	CD68		1.71811e-24	-0.67299	SLC29A4		1.27101e-19	-0.719845	INTS7		2.01389e-18	-0.955949	SRPRB		9.03659e-20	-0.948736
859	ATP11A		1.89069e-62	-0.328008	TES		6.9799e-55	-0.0748203	GAMT		6.45926e-65	-0.015417	GATA6		1.85926e-24	-0.672802	HOOK1		1.30758e-19	-0.719563	CKAP4		2.02562e-18	-0.955038	PDIK1L		9.03659e-20	-0.94827
860	KRAS	Known disease genes	2.27092e-62	-0.327564	RHOD		7.93994e-55	-0.0745327	PFDN4		7.1996e-65	-0.0154142	RECQL5		2.0341e-24	-0.672157	BRCC3		1.35704e-19	-0.719338	LRRC4		2.06401e-18	-0.954663	SYNJ2BP		9.83017e-20	-0.947801
861	SESN1		3.04729e-62	-0.32651	MSR1		8.07212e-55	-0.0743451	ZYX		7.52187e-65	-0.0153983	TNS3		2.07325e-24	-0.672002	RASGRF1		1.3796e-19	-0.719109	UTP14A		2.08406e-18	-0.95431	STEAP1		1.04736e-19	-0.94737
862	DBN1		3.06172e-62	-0.326486	CYP1B1		8.68997e-55	-0.0740694	HSPA5		7.97054e-65	-0.0153842	SLC15A3		2.17509e-24	-0.670966	ZDHHC13		1.3823e-19	-0.718946	ATG16L1		2.11218e-18	-0.953729	OSBPL6		1.06045e-19	-0.945677
863	RAD23A		3.64489e-62	-0.326348	NTMT1	Prognostic genes	1.03064e-54	-0.0739904	SLC25A5		8.92684e-65	-0.0153729	FRMD4B		2.17669e-24	-0.670577	NFYA		1.39431e-19	-0.718882	LAPTM4B		2.1828e-18	-0.951388	CXCL16		1.10123e-19	-0.945393
864	PSMD2	Prognostic genes	4.54762e-62	-0.324803	NF1		1.13583e-54	-0.0737291	RFX3		1.171e-64	-0.0152567	KRTCAP3		2.26903e-24	-0.669248	CKAP4		1.4704e-19	-0.718711	SLC25A13	Prognostic genes	2.19165e-18	-0.950665	SNAP47		1.10419e-19	-0.943707
865	MYH9		4.75044e-62	-0.324615	SERPINB1		1.1661e-54	-0.0732406	PDAP1		1.39309e-64	-0.015251	PMS2		2.29295e-24	-0.668951	ZDHHC9		1.58002e-19	-0.718575	CHMP3		2.28244e-18	-0.949315	ITM2B		1.11709e-19	-0.9437
866	ARHGAP18		4.8311e-62	-0.324471	ACOT13		1.25656e-54	-0.0728197	NMT1		1.41948e-64	-0.0152494	PLEKHA6		2.36571e-24	-0.668871	LRRC20		1.61597e-19	-0.718123	PAFAH1B3		2.45531e-18	-0.949284	DNAJB11		1.14933e-19	-0.943686
867	RTN4RL2		5.93947e-62	-0.32397	RAB38		1.47731e-54	-0.0724966	LSM4		1.4243e-64	-0.0152184	KCTD12		2.39397e-24	-0.668489	DLG5		1.61998e-19	-0.71777	ATAD2		2.46504e-18	-0.948692	FCER1G		1.16087e-19	-0.940711
868	GBP2		9.30307e-62	-0.322722	SLC35F2		1.73997e-54	-0.0721438	CAPN8		1.60943e-64	-0.0152101	CRELD2		2.41623e-24	-0.668029	THRA		1.63655e-19	-0.717376	LAPTM5		2.52173e-18	-0.947058	RAPGEF1		1.20046e-19	-0.939671
869	SEC61B		1.08469e-61	-0.32216	EPHA2		1.81511e-54	-0.072012	AK4		1.83842e-64	-0.0151893	MCM7		2.62471e-24	-0.667932	OLA1		1.65594e-19	-0.715408	BUB3		2.57295e-18	-0.945587	NUP43		1.20046e-19	-0.938708
870	KCTD12		1.1476e-61	-0.321738	RPLP1		2.03776e-54	-0.0719048	EFHD2		1.86726e-64	-0.0151645	PTPRM		2.69112e-24	-0.667719	PEBP4		1.7501e-19	-0.715354	SNRPA1		2.72388e-18	-0.945043	DNASE1		1.20743e-19	-0.938067
871	MXRA8		1.35302e-61	-0.320588	PPP4C	Prognostic genes	2.03832e-54	-0.0716913	HDGF		1.99256e-64	-0.015115	KPNB1		2.75383e-24	-0.667355	LMBRD1		1.81293e-19	-0.715168	TXNDC17		2.75087e-18	-0.944585	NOP2		1.30876e-19	-0.936885
872	CANT1		1.3589e-61	-0.319915	SPEF2		2.23733e-54	-0.0716292	SQLE		2.59798e-64	-0.0151066	SEC61A1		2.89108e-24	-0.666934	SNX25		1.87481e-19	-0.714996	DAP		2.79522e-18	-0.944255	TTC13		1.31749e-19	-0.936045
873	ERAP2		1.38863e-61	-0.319727	ARL5B		2.37522e-54	-0.0712519	GDF15		3.12524e-64	-0.0151011	ACOT11		2.9317e-24	-0.666818	DLG3		1.904e-19	-0.714648	FAM71A		2.83737e-18	-0.942872	WDR4		1.36281e-19	-0.935776
874	CISD1		1.72252e-61	-0.319611	COL6A2		2.45323e-54	-0.07108	TIMM50		3.23418e-64	-0.0150925	SCUBE3		2.93955e-24	-0.666731	TIMP1		2.10031e-19	-0.712846	RABIF		2.96107e-18	-0.942485	DENR		1.43215e-19	-0.935601
875	KNOP1		1.88058e-61	-0.31926	PCSK1N		2.6302e-54	-0.0709697	BCL3		3.24456e-64	-0.0150456	PSMD11		2.94863e-24	-0.66601	MRPL19		2.11695e-19	-0.710663	TLE4		3.00459e-18	-0.939898	DHCR24		1.45701e-19	-0.935
876	IL10RB		1.96017e-61	-0.318065	GTF3A		2.70299e-54	-0.07093	SMPDL3B		3.59673e-64	-0.015037	KLF2		2.96045e-24	-0.665643	SGK1		2.1309e-19	-0.709979	AXL		3.0212e-18	-0.939719	EIF3B		1.51832e-19	-0.933487
877	PPP1R1B		2.23036e-61	-0.31769	SLC39A11	Prognostic genes	2.73549e-54	-0.0708692	YBX1		3.68916e-64	-0.0150287	SYVN1		3.01378e-24	-0.665468	NUP43		2.13529e-19	-0.709027	CENPK	Prognostic genes	3.02712e-18	-0.939341	ENO1	Known disease genes	1.52587e-19	-0.932937
878	RAMP1		2.2915e-61	-0.317598	MRPL3		3.21426e-54	-0.0703997	ESYT2		4.30723e-64	-0.0149872	SMAD7		3.2769e-24	-0.664769	GALC		2.16327e-19	-0.708404	LZTFL1		3.04598e-18	-0.937735	CELF2		1.55661e-19	-0.930532
879	EIF2S3		2.95454e-61	-0.317332	EIF2S3		3.41477e-54	-0.0699973	ICA1		4.55547e-64	-0.0149459	LCLAT1		3.52418e-24	-0.662621	SFTPD		2.18967e-19	-0.708341	CCDC68		3.05003e-18	-0.937716	ATF3		1.58133e-19	-0.929934
880	UBL3		3.42367e-61	-0.317206	MED29		4.00763e-54	-0.0698783	SRPX2		4.60981e-64	-0.014922	FAM114A1		3.57034e-24	-0.662452	EGLN3		2.34184e-19	-0.708235	WBP4		3.18042e-18	-0.937519	ZDHHC13		1.59056e-19	-0.928536
881	PRR29		4.30846e-61	-0.317136	EGFR	Known disease genes	4.22552e-54	-0.0695496	TMUB1		5.26973e-64	-0.0148777	MSH2		3.69366e-24	-0.662146	CACNA2D2	Prognostic genes	2.35846e-19	-0.708123	KPNB1		3.20524e-18	-0.935726	ARAP2		1.61401e-19	-0.928452
882	DUSP5		4.43443e-61	-0.316241	DNAJC21		4.61319e-54	-0.0695407	TNFAIP8L1		5.30128e-64	-0.0148623	CLNS1A		3.70512e-24	-0.661299	MPZL1		2.4948e-19	-0.707868	WDR47		3.2081e-18	-0.934534	SORT1		1.63978e-19	-0.928021
883	EIF3M		5.4038e-61	-0.315833	SUPT5H		5.31908e-54	-0.0691773	MRPL20		5.75333e-64	-0.0148388	DNTTIP1	Prognostic genes	3.72303e-24	-0.661284	APH1B		2.60248e-19	-0.707727	PLEK2		3.35231e-18	-0.934337	SLC52A2		1.64465e-19	-0.928003
884	LYN		7.15918e-61	-0.314082	CDH3	Prognostic genes	5.65969e-54	-0.0689958	PDIA6		5.85088e-64	-0.014829	LSM8		3.83225e-24	-0.661194	BUB3		2.79733e-19	-0.707618	DOCK8		3.44931e-18	-0.934311	NFYA		1.65288e-19	-0.927547
885	SARAF		7.70972e-61	-0.313983	MMP1		5.67329e-54	-0.0687618	DUSP5		6.64123e-64	-0.0147813	AQP4	Known disease genes	3.94778e-24	-0.660113	PUSL1		2.89797e-19	-0.706544	BPHL		3.48231e-18	-0.934268	P4HB		1.68313e-19	-0.926221
886	PSMB1	Prognostic genes	7.7311e-61	-0.313689	RCC2		5.86518e-54	-0.0682931	CEACAM1		6.68011e-64	-0.0147414	UGDH		4.13392e-24	-0.659897	SGCB		2.94574e-19	-0.705741	SEC61A1		3.54472e-18	-0.933067	FBXL5		1.73457e-19	-0.923421
887	LSM14A		7.7311e-61	-0.313404	EIF3I		6.08326e-54	-0.0680572	SYF2		7.32653e-64	-0.0146985	NAT10		4.24962e-24	-0.659337	TRIM11		3.18297e-19	-0.704636	MCM6		3.7095e-18	-0.931089	LAPTM5		1.75103e-19	-0.923162
888	MRPL3		8.95267e-61	-0.312548	ENAH		6.28715e-54	-0.0678478	GPC4		7.42774e-64	-0.014672	RNF13		4.32109e-24	-0.658938	PABPC1		3.24952e-19	-0.703687	KLHL12		3.75452e-18	-0.930115	C11orf24		1.85727e-19	-0.921826
889	RNASE1	Prognostic genes	1.08327e-60	-0.312023	PGAM1	Prognostic genes	6.39433e-54	-0.0675329	MAP2K2		8.15098e-64	-0.0146458	CHAF1A		4.38389e-24	-0.657566	VPS72		3.45392e-19	-0.70333	DHTKD1		3.85587e-18	-0.927835	NIPSNAP1		1.94697e-19	-0.921822
890	NR2F2		1.3824e-60	-0.311775	HABP2		6.54334e-54	-0.067514	ARF1		1.00133e-63	-0.0145912	TSEN54		4.82162e-24	-0.656475	LSR		3.53116e-19	-0.70172	ESRP1		4.00529e-18	-0.926925	EIF1B		1.96139e-19	-0.921787
891	COA1		2.22217e-60	-0.31167	PDE9A		6.75244e-54	-0.067514	CAPZB	Prognostic genes	1.01254e-63	-0.014572	C17orf58		4.89938e-24	-0.656277	CRBN		3.69641e-19	-0.701405	PRSS12		4.03989e-18	-0.926268	MAP3K8		1.97207e-19	-0.920813
892	CMTM3		2.55013e-60	-0.310675	PDCD5		7.44371e-54	-0.0673138	TUBA4A		1.40598e-63	-0.0145446	POLR1C		4.98355e-24	-0.65559	FAM222B		3.77795e-19	-0.700734	PDCD2L		4.04182e-18	-0.926098	REPS2		2.06809e-19	-0.920238
893	DRAM1		2.74795e-60	-0.310207	RASEF		8.25031e-54	-0.0669596	TAP1		1.47593e-63	-0.0145149	STRBP	Known disease genes	5.08324e-24	-0.655441	NT5DC1		3.79434e-19	-0.700545	SRF		4.07089e-18	-0.926079	SGK1		2.08371e-19	-0.919654
894	PSMD13		3.21147e-60	-0.309941	NACC1		8.53009e-54	-0.0667613	MDH2		1.50585e-63	-0.0144631	MRTO4		5.42905e-24	-0.654643	SEC24D		3.8751e-19	-0.700531	PKP3		4.14223e-18	-0.925387	LEPROT		2.09474e-19	-0.918761
895	KPNA2	Known disease genes / Prognostic genes	3.54255e-60	-0.309625	TOP1		8.63341e-54	-0.0661299	METTL5		2.54962e-63	-0.0144394	MYO1B		5.46448e-24	-0.65464	ARHGEF10		3.97966e-19	-0.700494	ATXN2L		4.21021e-18	-0.923182	STARD4		2.10071e-19	-0.918378
896	ZYX		3.69851e-60	-0.309517	GNA12		8.92642e-54	-0.0659785	AP2S1	Prognostic genes	4.1525e-63	-0.0144205	CD2AP		5.58412e-24	-0.653424	ZNF207		4.26812e-19	-0.700239	RAB11FIP2		4.21021e-18	-0.922371	EEF2KMT		2.13517e-19	-0.917177
897	OSCP1	Prognostic genes	3.85309e-60	-0.309462	CCDC173		9.42353e-54	-0.0658044	CCDC6		4.51228e-63	-0.0143375	METTL21A		5.61694e-24	-0.653044	MMP1		4.30802e-19	-0.698419	BEX4		4.28732e-18	-0.92218	MRPL9		2.17214e-19	-0.916527
898	EIF6		4.89511e-60	-0.308572	IFITM1		9.49243e-54	-0.0655901	MORN2		4.59095e-63	-0.0143277	AHNAK2		5.89316e-24	-0.65157	MTMR4		4.51272e-19	-0.697508	MAP4		4.34767e-18	-0.918976	TMEM109		2.24243e-19	-0.915152
899	RAN		5.18499e-60	-0.308403	ZNF431		9.77125e-54	-0.0654909	NUDT22		4.65085e-63	-0.0142934	TRPT1		6.02807e-24	-0.650576	GSDMB		4.63615e-19	-0.697043	CAD		4.73888e-18	-0.91872	CDKL5		2.33818e-19	-0.914766
900	GGCX		5.61784e-60	-0.308345	CCND2		1.00261e-53	-0.0654621	CUTA		5.50188e-63	-0.014283	STIP1		6.32788e-24	-0.650329	CD81		4.7328e-19	-0.696835	ZC3H12C		4.75352e-18	-0.917935	PLAGL1		2.37208e-19	-0.914302
901	ARMC10		5.83398e-60	-0.308253	SPRR1B		1.12156e-53	-0.0653872	MGRN1		6.02532e-63	-0.0142733	METAP1		6.64834e-24	-0.650092	STT3A		4.74349e-19	-0.696719	NFS1		4.9772e-18	-0.917932	EPB41L5		2.37208e-19	-0.913868
902	TOM1L1		6.20102e-60	-0.307307	ENY2		1.25396e-53	-0.0653504	ACP1		6.7256e-63	-0.0142236	CRY2		6.64834e-24	-0.648781	COPB2		4.74614e-19	-0.696704	FCGR3A		5.08397e-18	-0.917661	MID1IP1		2.38521e-19	-0.913695
903	NDNF		8.50768e-60	-0.307256	UBA2		1.38261e-53	-0.0652936	NPLOC4		6.73331e-63	-0.0141399	DNMT3A		6.86021e-24	-0.648018	COPA		4.79559e-19	-0.696555	RASSF3		5.11861e-18	-0.91726	PARD6B		2.38747e-19	-0.912476
904	TIMM10	Known disease genes	8.55598e-60	-0.307154	OLFML3		1.46282e-53	-0.0652878	PSMC4		7.72717e-63	-0.0141273	LIMK1		6.91651e-24	-0.647654	CANT1		4.82947e-19	-0.696088	TMEM62		5.16679e-18	-0.916281	GALNT14		2.44359e-19	-0.912117
905	ZC3H15		9.6634e-60	-0.306857	MAPK15		1.83421e-53	-0.0652366	LRTOMT	Prognostic genes	9.70875e-63	-0.0140864	PRSS22		7.23001e-24	-0.647277	ZC3H8		4.98277e-19	-0.694437	RP2		5.24657e-18	-0.916105	SMG7		2.59746e-19	-0.911945
906	AVL9		1.0297e-59	-0.305965	ENDOV		1.84089e-53	-0.0651045	MRPS23		1.17663e-62	-0.0140603	PIGU		7.88496e-24	-0.646559	EPHX3		4.99664e-19	-0.693934	HSP90B1		5.5405e-18	-0.915795	GSDMB		2.80708e-19	-0.911609
907	BZW2	Known disease genes	1.06871e-59	-0.305666	SOX11		1.94476e-53	-0.0648788	NKG7		1.22793e-62	-0.0140128	EOGT		7.95813e-24	-0.646186	SERPINH1		5.14446e-19	-0.690559	HMGCR		5.78211e-18	-0.915438	DNAJC9		2.83172e-19	-0.911583
908	DCAF7		1.19806e-59	-0.30546	CCDC74A		2.2372e-53	-0.0647365	ATP6V0E1		1.67037e-62	-0.0139798	PUS7L		8.04718e-24	-0.645859	MTM1		5.39811e-19	-0.69009	CREBRF		5.88655e-18	-0.915141	BRCC3		2.95095e-19	-0.911103
909	NTMT1	Prognostic genes	1.63307e-59	-0.304696	RPS6KA2		3.62414e-53	-0.0647325	TPBG		2.05228e-62	-0.0139791	LPXN		8.173e-24	-0.644705	NFYB		5.47161e-19	-0.689853	URB1		6.09373e-18	-0.914089	CNP		2.99091e-19	-0.909795
910	ATP1B1	Prognostic genes	1.63488e-59	-0.304639	MRPL9		4.26253e-53	-0.0646737	SECISBP2L		2.37956e-62	-0.0139034	MTA3		8.27874e-24	-0.643415	STX7		5.59407e-19	-0.689294	CP		6.26682e-18	-0.912151	SIRT7		3.00082e-19	-0.909302
911	PFKL		1.77165e-59	-0.304405	NOB1		5.0762e-53	-0.0644271	CADM1		2.53074e-62	-0.0138726	TRIM2		8.4098e-24	-0.640677	RAB8B		5.90459e-19	-0.688915	SRSF1		6.69736e-18	-0.91185	NFYB		3.05058e-19	-0.908089
912	SIKE1		1.99531e-59	-0.303227	CNOT11		5.12626e-53	-0.064405	NDUFB10		3.05171e-62	-0.0138649	SH3BP5		8.61301e-24	-0.640584	DHRS11		6.10396e-19	-0.687702	MTHFD2		6.71637e-18	-0.911393	CADM1		3.11198e-19	-0.907838
913	NEDD4L		2.20647e-59	-0.303129	ZMIZ2		5.63893e-53	-0.0643807	SMCO4		3.60876e-62	-0.0138581	NDRG2		8.66072e-24	-0.640364	MANEAL		6.18591e-19	-0.687011	STT3A		7.22e-18	-0.91129	ARHGEF10		3.29614e-19	-0.90629
914	CTTN		2.33801e-59	-0.302462	RFXANK		6.30523e-53	-0.0642202	CNPY2		4.56095e-62	-0.0138338	LCOR		8.83296e-24	-0.640302	TRAF5		6.45316e-19	-0.68698	TSPAN9		7.53942e-18	-0.910197	TJP2		3.3011e-19	-0.906204
915	RPL36AL		3.1885e-59	-0.301884	PFDN4		8.00489e-53	-0.0642113	SDF4		6.04709e-62	-0.0138242	CDH1		8.94752e-24	-0.640069	RTN4RL2		6.5911e-19	-0.686197	ADGRD1		7.70903e-18	-0.909498	PTGFRN		3.33088e-19	-0.906149
916	GAA		4.05127e-59	-0.300977	TMEM184A		1.30312e-52	-0.0639303	CCDC167		6.31773e-62	-0.0137951	TRIT1		9.38288e-24	-0.639945	CA9		6.63027e-19	-0.686145	ZNF138		8.17363e-18	-0.908898	DLG5		3.40697e-19	-0.905703
917	NPDC1		4.10263e-59	-0.298914	SPATA20		1.35348e-52	-0.0639195	SLC39A4		7.08089e-62	-0.0137554	CCT6A		9.88869e-24	-0.639911	NQO1		6.64263e-19	-0.686073	NIPSNAP1		8.69667e-18	-0.908242	ABHD11		3.4688e-19	-0.905397
918	MTSS1		4.10263e-59	-0.298735	SLC9A3R1		1.38976e-52	-0.0637036	MRPS7		7.37543e-62	-0.0136592	APBB1		1.00056e-23	-0.639797	SORT1		6.92612e-19	-0.685638	IPO4	Known disease genes	9.38636e-18	-0.907271	PPIL1		3.57486e-19	-0.904098
919	LPIN2		4.15627e-59	-0.297403	NDUFS8		1.4888e-52	-0.0636279	C21orf58		8.28893e-62	-0.0136555	CHTOP		1.01085e-23	-0.639767	NIFK		7.10302e-19	-0.684837	CXCL3		1.04337e-17	-0.906303	OVOL1		3.6696e-19	-0.903693
920	CDK4		4.45682e-59	-0.296212	MRPL37		1.79445e-52	-0.063583	COX5A		9.90564e-62	-0.0135904	SMG5		1.03464e-23	-0.638001	PRDX4		7.22203e-19	-0.68446	CNFN		1.05133e-17	-0.904646	MICALL2		3.67864e-19	-0.902848
921	ARRDC3		4.65962e-59	-0.29558	BCKDK		1.84273e-52	-0.0629618	RCN1		1.00457e-61	-0.0135504	DNAJC10		1.03531e-23	-0.637857	SRPRB		7.22707e-19	-0.684345	CREBL2		1.12426e-17	-0.903022	SBK1		3.68237e-19	-0.9027
922	LSM7		4.88777e-59	-0.294886	MYO19		1.86634e-52	-0.0628914	ZMIZ2		1.0492e-61	-0.0135233	LIG1		1.07129e-23	-0.63726	PHKG2		7.23365e-19	-0.684285	TK1	Known disease genes / Prognostic genes	1.13665e-17	-0.902574	CCDC34		3.71707e-19	-0.89935
923	COA6		5.17722e-59	-0.294597	CD74		2.24839e-52	-0.0627894	HNRNPD		1.37467e-61	-0.0134935	MTHFD1L		1.099e-23	-0.636083	DDX52		7.58881e-19	-0.68426	CD81		1.17549e-17	-0.901718	ALG6		3.78423e-19	-0.89931
924	MORN3		5.78784e-59	-0.294252	FAM13A		2.32218e-52	-0.0624384	EIF6		1.41975e-61	-0.0134664	CPD		1.10787e-23	-0.635453	FUBP1		7.97838e-19	-0.683614	FARSB		1.22661e-17	-0.9013	DIAPH2		4.00277e-19	-0.898821
925	CLTB		6.04882e-59	-0.293748	WIPF2		2.39602e-52	-0.0622656	MSMO1		1.77757e-61	-0.0134347	PHF12		1.1192e-23	-0.632958	SRPX2		8.318e-19	-0.683614	ZDHHC3		1.25484e-17	-0.90095	MTMR4		4.12931e-19	-0.898392
926	B9D1		6.2482e-59	-0.292202	CHCHD2		2.64972e-52	-0.0622351	LAMB3		1.95346e-61	-0.0134097	SEZ6L2		1.12537e-23	-0.632262	PIGM		8.40665e-19	-0.682913	POLR3E		1.29649e-17	-0.900943	GPI		4.50007e-19	-0.897085
927	CLINT1		6.59604e-59	-0.291624	AVL9		3.2283e-52	-0.0620845	HNRNPA2B1		2.0307e-61	-0.0134094	FOXRED1		1.13923e-23	-0.627084	ANKZF1		8.46339e-19	-0.682402	CHTOP		1.32569e-17	-0.900836	SORD		4.53062e-19	-0.895119
928	FHL2		8.54257e-59	-0.291354	ARL4A		3.29278e-52	-0.0620263	CLINT1		2.38936e-61	-0.013394	MRPL15		1.15656e-23	-0.626431	MOB3C		8.57354e-19	-0.680963	NAA40		1.33345e-17	-0.900456	FOXN3		4.53448e-19	-0.894466
929	NEK6		8.7116e-59	-0.291157	PLEKHS1		3.42002e-52	-0.061912	MT-ATP6		2.74157e-61	-0.0132693	FABP5		1.16396e-23	-0.626311	PDIK1L		8.67437e-19	-0.680703	GNPNAT1	Known disease genes	1.34106e-17	-0.900036	DDX52		4.74613e-19	-0.893792
930	SHROOM1		9.42512e-59	-0.290948	ARHGAP26		5.04704e-52	-0.0619097	CCDC113	Prognostic genes	4.07525e-61	-0.0132668	MEST		1.23882e-23	-0.625973	SEC61A1		9.02284e-19	-0.679443	PTN		1.39507e-17	-0.899954	HSPA5		4.79031e-19	-0.89375
931	LTBR		1.06981e-58	-0.290524	SVIP		6.32795e-52	-0.0619087	HTATIP2		5.1882e-61	-0.0132666	SORBS3		1.36447e-23	-0.625505	ALDH2		9.35067e-19	-0.678608	CHEK1	Prognostic genes	1.42425e-17	-0.899896	AP1S2		4.84828e-19	-0.893694
932	TIMM50		1.08703e-58	-0.289701	ANKRD22		6.58615e-52	-0.061429	ACOT13		5.6127e-61	-0.0132464	ATXN2L		1.37911e-23	-0.625243	KAZN		9.42585e-19	-0.67841	CTTN		1.51366e-17	-0.899734	QDPR		4.89084e-19	-0.893267
933	SUN1		1.43714e-58	-0.289423	PFN2		7.35441e-52	-0.0613488	CANT1		6.1008e-61	-0.0132456	PCGF3		1.40079e-23	-0.623775	NKRF		9.49572e-19	-0.677631	LCP1		1.61793e-17	-0.899329	SEMA3B		4.92094e-19	-0.892627
934	CCDC69		1.61191e-58	-0.289133	RPL39L		1.088e-51	-0.06116	PHC2		6.13024e-61	-0.013239	PMP22		1.41233e-23	-0.621415	MESP1		9.50083e-19	-0.676817	TFAP2A		1.64229e-17	-0.898216	IL17RA		4.95241e-19	-0.892335
935	MSN		2.35085e-58	-0.289003	LAMB3		1.21103e-51	-0.0610043	ERBB2	Known disease genes	6.49167e-61	-0.0132376	PDZD11		1.50046e-23	-0.621	CTTN		9.54923e-19	-0.675709	PPP6C	Prognostic genes	1.64909e-17	-0.898194	GBP4		5.03437e-19	-0.891814
936	CDS1		2.5553e-58	-0.288943	IFNAR1		1.22033e-51	-0.0608796	PFN2		6.72026e-61	-0.0131867	CFB	Prognostic genes	1.52814e-23	-0.62082	SLC39A7		9.97872e-19	-0.674562	FEN1		1.655e-17	-0.898044	CPAMD8		5.1503e-19	-0.888949
937	DEK		2.57273e-58	-0.28886	CCDC167		1.32902e-51	-0.0608471	AP2M1	Prognostic genes	6.90933e-61	-0.0131191	ABCG1		1.53739e-23	-0.620378	MAP4		9.97872e-19	-0.674033	PLEKHA1		1.65618e-17	-0.897383	RNF38		5.16709e-19	-0.888881
938	ASPHD1		2.60504e-58	-0.288859	CALR		1.36445e-51	-0.0608314	TIMM9		7.4976e-61	-0.0130935	SETD6		1.57401e-23	-0.619304	YWHAZ		1.02516e-18	-0.672538	SNX24		1.67899e-17	-0.896304	LIPA		5.37137e-19	-0.888535
939	TANC2		2.61724e-58	-0.288446	MED13		1.46384e-51	-0.0603793	WIPF2		9.21542e-61	-0.0130875	SGPP2		1.7575e-23	-0.619273	NABP2		1.04739e-18	-0.672426	SMG5		1.70314e-17	-0.896132	TRMU		5.38404e-19	-0.88843
940	PSMC5		2.69092e-58	-0.285568	SESN1		1.59929e-51	-0.0603513	BCL2L15		1.04974e-60	-0.0130746	BORCS7		1.94101e-23	-0.619262	NAT10		1.05858e-18	-0.671339	IKBKE		1.70502e-17	-0.894478	BUB3		5.64144e-19	-0.888014
941	TGFB1		2.98723e-58	-0.285275	HLA-DPB1		1.92829e-51	-0.0601633	CLIC1		1.13155e-60	-0.0129971	RRP1		1.95191e-23	-0.618857	ZNF7		1.06245e-18	-0.671336	FBLN1		1.73222e-17	-0.893437	LPAR2		5.94507e-19	-0.887831
942	HGS		2.99729e-58	-0.285058	SLC16A7		1.9413e-51	-0.0601372	DDOST	Prognostic genes	1.55583e-60	-0.012997	EXOSC5		1.98708e-23	-0.617912	KPNB1		1.06357e-18	-0.670562	CRK		1.787e-17	-0.893148	TMED3		6.0559e-19	-0.887587
943	SLCO2A1		3.65478e-58	-0.284847	EIF2AK1	Known disease genes	2.06563e-51	-0.0601338	FBLIM1		1.6256e-60	-0.0129836	FASTKD3		2.05252e-23	-0.617793	MTX1		1.07376e-18	-0.667849	UNC5CL		1.79772e-17	-0.892977	TPPP		6.20655e-19	-0.885356
944	CFAP157		4.01442e-58	-0.283783	FAAP20		2.63892e-51	-0.0601291	HP1BP3		1.66291e-60	-0.0129642	ZFP36		2.19564e-23	-0.617615	DROSHA		1.07823e-18	-0.667644	MIS18A		1.82538e-17	-0.892613	RNF34		6.24396e-19	-0.885341
945	MYO19		4.22015e-58	-0.283676	QSOX1		2.66245e-51	-0.0600099	HBB		1.74402e-60	-0.0129425	CRIM1		2.34552e-23	-0.61635	SFTPA2		1.08901e-18	-0.666555	PITPNA		1.91611e-17	-0.892605	TCF3		6.46082e-19	-0.884619
946	CACNA2D2	Prognostic genes	4.28989e-58	-0.283671	SQLE		2.87319e-51	-0.0598826	FAM229B		2.00267e-60	-0.0129188	NFATC4		2.36034e-23	-0.616177	PRIM2		1.13983e-18	-0.665103	PTGFRN		1.93544e-17	-0.891872	HSDL2		6.47202e-19	-0.883564
947	ENDOV		4.29342e-58	-0.283608	FLOT1		2.95529e-51	-0.0598276	APRT		2.35364e-60	-0.0128666	CDK5RAP3		2.45752e-23	-0.614583	E2F5		1.38025e-18	-0.664774	MCM2		2.0282e-17	-0.891263	CHD1L		6.51989e-19	-0.883439
948	C12orf45		4.38037e-58	-0.283359	SEC61G		3.66556e-51	-0.0598173	CDH3	Prognostic genes	2.65613e-60	-0.0128448	C1orf35		2.46168e-23	-0.613694	TMEM45B		1.40707e-18	-0.663709	MRGBP		2.03186e-17	-0.890804	TMOD3		6.60874e-19	-0.883238
949	LEMD1		4.76077e-58	-0.283338	GIPC1		3.92903e-51	-0.0597882	CCDC181		3.19952e-60	-0.0127829	LTC4S		2.49959e-23	-0.613027	SLC19A1	Known disease genes	1.43906e-18	-0.663303	CRTAP		2.03796e-17	-0.890035	HMBS		6.66903e-19	-0.882936
950	SPINT1		4.9194e-58	-0.283236	PHPT1		4.15763e-51	-0.0597661	BCR		3.30866e-60	-0.012759	PRR3		2.50577e-23	-0.61278	NDC1		1.44977e-18	-0.662745	GSAP		2.05543e-17	-0.889037	MOB3C		6.72392e-19	-0.882574
951	ATP6V0E1		7.18808e-58	-0.282126	VMP1		4.23891e-51	-0.059665	COPA		3.67534e-60	-0.0127513	SOCS2		2.667e-23	-0.612731	RBM28		1.47195e-18	-0.662485	CLNS1A		2.05645e-17	-0.888161	DNMT3A		6.76638e-19	-0.881394
952	HGD		8.57238e-58	-0.281949	ATIC		5.029e-51	-0.0594447	FAM50A		3.86227e-60	-0.0127278	ANO6		2.92082e-23	-0.612089	DNAJB4		1.55389e-18	-0.662451	ID2		2.09382e-17	-0.887606	MRPL19		7.72131e-19	-0.881027
953	ACTR2	Prognostic genes	8.90997e-58	-0.281576	EIF3E	Known disease genes	5.1558e-51	-0.0594092	TAX1BP1		3.90369e-60	-0.0126577	TMEM87B		3.24928e-23	-0.611598	ETV5		1.63963e-18	-0.662131	COL4A3		2.23648e-17	-0.887468	RBM28		7.85685e-19	-0.880487
954	COPA		9.30709e-58	-0.281471	PROM2		6.05966e-51	-0.0591275	PFDN6		3.95672e-60	-0.0126335	CUL7		3.2551e-23	-0.611318	ADCY9		1.70343e-18	-0.661456	NEDD4L		2.2427e-17	-0.887192	IL20RA		8.15278e-19	-0.880159
955	CAST		9.60476e-58	-0.28076	COA1		6.11981e-51	-0.058962	ZC3H15		4.17501e-60	-0.0125953	NCAPD3		3.2573e-23	-0.611177	TPSB2		1.73605e-18	-0.661029	DDX55		2.24469e-17	-0.88701	PODXL2		8.19323e-19	-0.879512
956	DFFA		1.30262e-57	-0.280421	RAB36		6.61344e-51	-0.0588536	IFNAR1		4.30164e-60	-0.0125438	GALNT6		3.31712e-23	-0.610896	FBXL5		1.76553e-18	-0.660024	ST7		2.314e-17	-0.886831	CREB3L4	Prognostic genes	8.24628e-19	-0.879248
957	SLC25A6		1.40747e-57	-0.280211	C9orf135		6.61818e-51	-0.0587842	COA3		4.38754e-60	-0.012532	ARID5A		3.33775e-23	-0.610121	MZT2A		1.77284e-18	-0.65996	NUMB		2.35341e-17	-0.886021	ETV5		8.28078e-19	-0.877428
958	CTSH		1.47854e-57	-0.27998	MRPL36		6.88079e-51	-0.0586888	COA1		4.49368e-60	-0.0125219	AIFM1		3.34405e-23	-0.609304	PRPF3		1.82743e-18	-0.659902	LYRM9		2.38097e-17	-0.885502	ESRP1		8.35032e-19	-0.875354
959	SLC12A2		1.51974e-57	-0.279586	SNU13		8.00553e-51	-0.0585425	RHOB		4.52135e-60	-0.0124864	TOM1L1		3.38511e-23	-0.608841	CYP4B1		1.89062e-18	-0.658678	CLIC4		2.38327e-17	-0.883675	AIMP2		8.58556e-19	-0.87526
960	PPP1R15B		1.68153e-57	-0.279345	PLPP2		8.86692e-51	-0.0584322	EIF1AX		4.91215e-60	-0.0124762	HPS3		3.44227e-23	-0.608521	KIAA1522		1.90018e-18	-0.658345	DAPK1		2.3922e-17	-0.883254	HECW2		8.73904e-19	-0.874912
961	CD24		1.72829e-57	-0.279301	SPRR2D		9.80464e-51	-0.0583045	LRRC23		5.12235e-60	-0.01246	CACNB3		3.58095e-23	-0.608422	SYNJ2BP		1.92497e-18	-0.658092	TRIOBP		2.40581e-17	-0.883202	FBLN1		9.09567e-19	-0.874744
962	FGF7		1.75641e-57	-0.279101	STX11		1.12728e-50	-0.0583036	PSMA2		5.38895e-60	-0.0123746	SAP30L		3.59881e-23	-0.608292	NELFCD		2.03116e-18	-0.65669	BOP1		2.50355e-17	-0.882459	DHRS13		9.84931e-19	-0.873245
963	SRRM2		1.85319e-57	-0.278073	MRPS21		1.13593e-50	-0.0577408	MAPK15		5.49397e-60	-0.0123652	NFE2L3		3.76231e-23	-0.607705	ATXN2L		2.04789e-18	-0.656568	DUSP8		2.64754e-17	-0.882129	NFATC1		1.02474e-18	-0.871064
964	TMEM106C		1.8803e-57	-0.276643	PTPRN2		1.16277e-50	-0.0573334	MAPK13		5.81068e-60	-0.0123489	FKBP10		3.96473e-23	-0.60749	CHTOP		2.05716e-18	-0.656451	MBP		2.66421e-17	-0.881433	CD81		1.05955e-18	-0.869949
965	FCGBP		2.07029e-57	-0.27652	E2F3		1.27539e-50	-0.0573155	CPD		5.93961e-60	-0.0123472	STX6		3.97436e-23	-0.606892	EIF1B		2.09038e-18	-0.655394	PAK6		2.73442e-17	-0.881204	HDHD3		1.08767e-18	-0.867525
966	DDX21		2.11687e-57	-0.27604	RYR1		1.31999e-50	-0.0571972	MRPL21		6.21007e-60	-0.0123381	ISG20L2		4.11937e-23	-0.606802	DTX2		2.09977e-18	-0.655386	CASZ1		2.76991e-17	-0.881001	SOX12		1.15308e-18	-0.867059
967	UGP2		2.62357e-57	-0.275771	MXRA8		1.32405e-50	-0.057182	MCEMP1		6.77897e-60	-0.0123344	PCNA		4.13746e-23	-0.606181	PFDN6		2.09977e-18	-0.655166	SLC35A1		2.7775e-17	-0.880903	TRIM11		1.15686e-18	-0.866433
968	PCGF2		2.77755e-57	-0.274089	LFNG		1.78844e-50	-0.057104	ERH		7.46233e-60	-0.0122276	ORC2		4.22902e-23	-0.605369	ITM2B		2.17137e-18	-0.655063	CPOX		2.81626e-17	-0.880479	MTHFD1L		1.15955e-18	-0.866181
969	ARMC3		3.49546e-57	-0.273567	MUC5B		1.98316e-50	-0.0570331	CX3CL1		8.65793e-60	-0.012187	RFC5		4.34029e-23	-0.605042	INSIG1		2.19706e-18	-0.654647	TCF3		2.88139e-17	-0.877844	STRBP	Known disease genes	1.16137e-18	-0.866103
970	DUOXA1		3.72461e-57	-0.273338	PPP1R35		1.99938e-50	-0.0569485	PTBP1		1.04994e-59	-0.012094	KLHL23		4.38334e-23	-0.604794	BMP2		2.26047e-18	-0.65427	PHF12		2.98518e-17	-0.87505	SLC19A1	Known disease genes	1.19651e-18	-0.865521
971	TMEM14C		3.87942e-57	-0.27325	LSM8		2.00735e-50	-0.0568272	RAB5C		1.44457e-59	-0.0120623	SLX4IP		4.48583e-23	-0.60403	METAP1		2.37364e-18	-0.654228	TPBG		3.01046e-17	-0.874262	MAP4		1.21598e-18	-0.865074
972	MESP1		3.99471e-57	-0.27226	KDM5B		2.02648e-50	-0.0567996	MNS1		2.01748e-59	-0.0120149	NMNAT2		4.76151e-23	-0.603839	ALDOA	Known disease genes	2.40842e-18	-0.653938	MTMR4		3.03924e-17	-0.872319	ASGR1		1.22823e-18	-0.863625
973	HIF1A		4.44733e-57	-0.271055	YWHAZ		2.41021e-50	-0.0566713	SOX11		2.21305e-59	-0.0119476	ENTPD6		4.88269e-23	-0.603034	TEF		2.41912e-18	-0.653398	FKBP1B		3.03949e-17	-0.871804	TEF		1.27415e-18	-0.863618
974	CKAP4		4.51184e-57	-0.270736	CPD		2.75783e-50	-0.0565265	CENPM		2.43727e-59	-0.0119128	DUSP12		4.93538e-23	-0.603	TMED3		2.47102e-18	-0.652792	CFAP73		3.08381e-17	-0.871075	COPA		1.29192e-18	-0.863058
975	LRIG3		4.59866e-57	-0.270612	MALL		2.88531e-50	-0.056469	UBA2		2.57734e-59	-0.0118494	SRSF1		4.99497e-23	-0.602898	NCF1		2.57579e-18	-0.649748	SMUG1		3.17113e-17	-0.87074	FCGR3A		1.30242e-18	-0.861604
976	HDGF		4.86697e-57	-0.270509	ICAM1		2.95141e-50	-0.0564012	TOP1		3.36656e-59	-0.0118413	AFF3		5.0017e-23	-0.601521	FOS		2.59194e-18	-0.649474	PROM2		3.18797e-17	-0.86752	CES1		1.43362e-18	-0.861433
977	AK1		5.96596e-57	-0.270386	TALDO1		2.97105e-50	-0.0563501	TGFBI		3.46308e-59	-0.0118389	TTPAL		5.10928e-23	-0.601379	NSMF		2.70664e-18	-0.649414	TTI1		3.27792e-17	-0.867356	CLNS1A		1.44265e-18	-0.861183
978	TIMM8B		7.2514e-57	-0.270331	UBE2R2		2.97369e-50	-0.0559832	GIPC1		3.6596e-59	-0.0118033	C16orf87		5.12062e-23	-0.601248	PHF12		2.86627e-18	-0.64941	ZNF623		3.34978e-17	-0.867022	FHDC1		1.53785e-18	-0.860054
979	HNRNPA1	Known disease genes	7.59776e-57	-0.269352	PDIA4		3.0616e-50	-0.0559789	WIPI2		4.24805e-59	-0.0118028	DNAJC2		5.18867e-23	-0.601236	LAPTM4B		2.88642e-18	-0.64837	NIFK		3.35577e-17	-0.865528	SERTAD1		1.55169e-18	-0.859941
980	EIF1AX		8.01171e-57	-0.269108	SLC52A2		3.15255e-50	-0.0559581	RPL36AL		4.35429e-59	-0.0117806	CALU		5.23102e-23	-0.600991	SMG5		2.92651e-18	-0.647409	RNF11		3.38989e-17	-0.86535	MPZL1		1.62298e-18	-0.858653
981	COL18A1		8.44004e-57	-0.268626	RBCK1		3.3881e-50	-0.0559232	LACTB2		4.59654e-59	-0.0117371	NDUFAF7		5.38379e-23	-0.600321	HSP90B1		2.99347e-18	-0.646779	NEK5		3.42869e-17	-0.863137	NDC1		1.68855e-18	-0.857507
982	MTA1		8.65193e-57	-0.268417	RCN1		3.48776e-50	-0.0559101	MAGED1		4.73247e-59	-0.0116086	MRPL24		5.40639e-23	-0.599807	YDJC		3.02811e-18	-0.645917	ACBD6		3.49101e-17	-0.863002	PRPF3		1.79293e-18	-0.856269
983	ZFAND3	Prognostic genes	9.62762e-57	-0.26806	COX20		4.0035e-50	-0.0558492	FCER1G		5.23468e-59	-0.01155	CASP3		5.52535e-23	-0.598259	ISG20L2		3.04832e-18	-0.64499	PSMD11		3.69641e-17	-0.862649	MAPRE2		1.83761e-18	-0.856227
984	SLC39A11	Prognostic genes	9.71355e-57	-0.268054	MAGED1		4.61035e-50	-0.0552235	LAMTOR5		6.31567e-59	-0.0115155	SLC35A2		5.84265e-23	-0.596477	GRN		3.0598e-18	-0.64465	BEX5		3.69891e-17	-0.862537	PHF12		1.8637e-18	-0.856041
985	TOMM40	Known disease genes	1.02965e-56	-0.268043	ATP6V0A1		4.66979e-50	-0.0551769	STMN1		6.49008e-59	-0.011452	POLE		5.93343e-23	-0.596217	PXDC1		3.15219e-18	-0.644584	TGFB2		3.71401e-17	-0.861218	HYOU1		1.88652e-18	-0.855875
986	C1orf43		1.07507e-56	-0.267131	SPSB1		4.67794e-50	-0.0551473	RPSA	Known disease genes	6.62586e-59	-0.0114177	CKAP5		5.94283e-23	-0.596012	ARHGEF37		3.19864e-18	-0.644514	ALG3		3.71814e-17	-0.861073	HDAC1		1.91155e-18	-0.853528
987	TMED4		1.17292e-56	-0.267063	OXA1L		5.38298e-50	-0.055041	CYP1B1		6.94694e-59	-0.0113976	CLDN4		6.34547e-23	-0.594448	IL11RA		3.24897e-18	-0.642499	SEC24D		3.7676e-17	-0.860906	DLG3		1.9245e-18	-0.853453
988	SOX2	Known disease genes	1.32572e-56	-0.266914	TFF3		5.72519e-50	-0.0549336	CTHRC1		7.29385e-59	-0.0113942	VPS45		6.76358e-23	-0.59443	PSMD11		3.3878e-18	-0.642479	DPH2		3.84446e-17	-0.860863	CHMP3		2.02881e-18	-0.850067
989	PGP		1.78122e-56	-0.266515	PML		6.11525e-50	-0.0547094	LIMK1		7.61302e-59	-0.0113677	C1orf159		7.07741e-23	-0.594184	CELF2		3.39835e-18	-0.642461	SETD3		4.04275e-17	-0.860076	TBC1D2		2.05373e-18	-0.849582
990	ZNF581		1.87414e-56	-0.266323	HSD17B6		7.16072e-50	-0.0546997	POP7		1.25819e-58	-0.0113548	AP1G2		7.11766e-23	-0.594114	DAP		3.92379e-18	-0.641246	DUS4L		4.07697e-17	-0.857848	RPL39L		2.06811e-18	-0.848877
991	HPGD		2.2184e-56	-0.265555	CREB5		9.12541e-50	-0.0546879	CCNJL		1.28843e-58	-0.0113446	WDR74		7.76975e-23	-0.594061	PMS2		4.03872e-18	-0.639258	LSS		4.11091e-17	-0.857442	E2F5		2.06874e-18	-0.848749
992	MAD2L2		2.33724e-56	-0.264751	STX2		9.24234e-50	-0.0546638	PON3		1.38165e-58	-0.0113382	SEC14L1		7.80752e-23	-0.593885	MUC3A		4.06119e-18	-0.638177	RPE	Prognostic genes	4.11194e-17	-0.857431	LCP1		2.10557e-18	-0.848487
993	EIF4EBP1		2.40921e-56	-0.264525	POP7		9.50939e-50	-0.0545492	CDK4		1.41663e-58	-0.0113265	EIF4E3		8.28491e-23	-0.593086	TSPAN6	Prognostic genes	4.24109e-18	-0.638123	ANKZF1		4.18373e-17	-0.857222	IGFBP3		2.1586e-18	-0.848071
994	SCNN1B		3.13943e-56	-0.264457	MEST		1.01501e-49	-0.0545454	HOOK2		1.42223e-58	-0.0113058	HPRT1		8.35802e-23	-0.592736	MID1IP1		4.42162e-18	-0.637985	GORAB		4.20306e-17	-0.856437	RILP		2.1605e-18	-0.847499
995	TFG		3.42227e-56	-0.263649	ST3GAL5		1.09257e-49	-0.054342	CIB1		1.77666e-58	-0.0112629	ACAD8		8.74432e-23	-0.59206	STX6		4.42753e-18	-0.636497	MEST		4.22901e-17	-0.855916	SGCE		2.16202e-18	-0.847244
996	GNB2		3.56348e-56	-0.262854	TGFB1		1.19771e-49	-0.0543413	TTLL7		1.88161e-58	-0.011248	NONO		8.91879e-23	-0.591708	FAM83H		4.44817e-18	-0.636423	NELFCD		4.30902e-17	-0.854777	SPINK1		2.17322e-18	-0.84588
997	IQCG		3.73794e-56	-0.262471	EPHX3		1.28036e-49	-0.0541709	PSMD2	Prognostic genes	2.11928e-58	-0.0112359	ABHD5		9.01959e-23	-0.590572	CLNS1A		4.59739e-18	-0.636282	ATP2A2		4.38797e-17	-0.854634	TNFRSF18		2.1989e-18	-0.844879
998	NDUFA11		3.83615e-56	-0.260646	ZDHHC12		1.42206e-49	-0.0541182	ABCF1		2.35966e-58	-0.0112173	RPAP3		9.03963e-23	-0.589228	RECQL5		4.6087e-18	-0.6357	PHF2		4.48717e-17	-0.854599	DSN1		2.21552e-18	-0.844535
999	RNASEH2C		3.91928e-56	-0.260479	LRRC8A		1.43174e-49	-0.0541128	RPA3		2.6786e-58	-0.011182	PREB		9.20496e-23	-0.589109	AP1S1		4.75942e-18	-0.635315	IDI1		4.65584e-17	-0.854324	SERPINH1		2.2419e-18	-0.844409
1000	NUCB2		4.00657e-56	-0.260197	MYL12B		1.47121e-49	-0.0540527	IFITM10		2.78167e-58	-0.0111373	CTDSPL		9.23151e-23	-0.58874	SRD5A3	Prognostic genes	4.87461e-18	-0.634894	IQCA1		4.71532e-17	-0.853859	MAGI1		2.33291e-18	-0.844061
1001	NT5C3B		4.68124e-56	-0.260024	NSA2		1.48033e-49	-0.053898	MED29		2.92412e-58	-0.0111345	TTC9C		9.73726e-23	-0.588136	STIP1		5.06639e-18	-0.633542	CD44		4.71823e-17	-0.853199	ATOH8		2.41799e-18	-0.842899
1002	CHL1		5.17593e-56	-0.259819	AGRN		1.87271e-49	-0.0537481	PID1		3.24964e-58	-0.0111147	LIPA		9.77285e-23	-0.58719	SCD5		5.13592e-18	-0.633208	DLG3		4.74899e-17	-0.852938	C8orf76		2.45369e-18	-0.840816
1003	STK39	Known disease genes	5.18695e-56	-0.259782	TAP1		1.9135e-49	-0.0537251	CDC25B		3.43225e-58	-0.0109879	CDK5RAP1		1.04411e-22	-0.586945	DNASE1		5.17474e-18	-0.632965	CC2D2A		4.75597e-17	-0.852365	FUT3		2.52198e-18	-0.838156
1004	TSR3		6.00746e-56	-0.2596	RNF5		1.91469e-49	-0.0536103	TMEM134		3.57332e-58	-0.0109515	PAPSS2		1.06751e-22	-0.585883	MAGED1		5.20528e-18	-0.632709	LIG3		4.81815e-17	-0.852335	NKRF		2.61046e-18	-0.837707
1005	PFN2		6.95342e-56	-0.258875	MAP7D1		2.37295e-49	-0.0534987	CD164L2		4.61302e-58	-0.0108705	NMRAL1		1.07112e-22	-0.585452	PIGU		5.20528e-18	-0.63268	RIN3		4.93e-17	-0.84882	CKAP4		2.62986e-18	-0.835992
1006	ZC3H11A		7.03237e-56	-0.258874	CLDN12		2.45407e-49	-0.0534619	NDUFA4		4.99816e-58	-0.0107996	EED		1.12574e-22	-0.585298	TPI1	Known disease genes / Prognostic genes	5.23244e-18	-0.632558	LBH		5.02061e-17	-0.846853	C1orf21		2.83179e-18	-0.835917
1007	REL		7.15147e-56	-0.25879	IER5L		2.53644e-49	-0.0534475	HMGB3		5.37395e-58	-0.01078	ORC5		1.15007e-22	-0.585279	MTA3		5.37334e-18	-0.632222	ECHDC1		5.04993e-17	-0.846453	RAC3		2.90607e-18	-0.835489
1008	RPS6KA3		7.23533e-56	-0.258621	MNS1		2.69472e-49	-0.0532637	RBCK1		5.82266e-58	-0.0107221	ACHE		1.17724e-22	-0.584958	TSEN54		5.45957e-18	-0.631919	SLC35B2		5.70597e-17	-0.845726	PHKG2		3.11209e-18	-0.83523
1009	SHROOM4		9.03253e-56	-0.258608	C7orf50		2.72462e-49	-0.0531983	GNA12		5.89498e-58	-0.0107089	GTPBP2	Prognostic genes	1.18739e-22	-0.58403	SYVN1		5.56689e-18	-0.630597	ZMYND19		5.9135e-17	-0.845258	SULT1A1		3.11667e-18	-0.833836
1010	INTS1		9.30103e-56	-0.258166	CTNNA1		2.90395e-49	-0.0530463	ZNF207		6.97382e-58	-0.0106255	ETF1		1.20755e-22	-0.583894	GAB2		5.56967e-18	-0.630387	RIC3		6.00804e-17	-0.844346	C9orf24		3.17648e-18	-0.831414
1011	ZDHHC12		1.04407e-55	-0.257004	NAB2		2.96401e-49	-0.0530246	ALDH3B1		6.99697e-58	-0.0106161	IDH2		1.22152e-22	-0.58352	JUNB	Known disease genes	5.79967e-18	-0.630228	DBNDD1		6.1117e-17	-0.84372	FAM13B		3.26087e-18	-0.830509
1012	ATP6V1F		1.0494e-55	-0.25697	ENDOD1		3.22941e-49	-0.0529016	UQCC3		7.08272e-58	-0.010612	DPP3		1.23703e-22	-0.58335	PDIA6		5.87234e-18	-0.629654	TYMS	Known disease genes	6.11282e-17	-0.841848	ICA1		3.30472e-18	-0.829317
1013	CNN2		1.1316e-55	-0.256878	TRAF5		4.31055e-49	-0.0528008	CLIC5		7.67569e-58	-0.0105812	GTPBP3		1.2577e-22	-0.581158	CDH3	Prognostic genes	5.92649e-18	-0.628551	KIAA1522		6.39089e-17	-0.841675	CCT6A		3.30891e-18	-0.827663
1014	CAPRIN1		1.27553e-55	-0.256774	FAM222B		4.42809e-49	-0.0526092	CAPRIN1		8.29546e-58	-0.0105767	DDX39A		1.38869e-22	-0.580954	MX2		5.93065e-18	-0.628105	CAMK2N1		6.8879e-17	-0.836184	DROSHA		3.35771e-18	-0.827499
1015	RTKN2		1.34277e-55	-0.256489	TUBG1		4.8468e-49	-0.0525174	IL27RA		8.58841e-58	-0.0105672	TIMP3		1.39533e-22	-0.580583	NDEL1		5.93065e-18	-0.627194	AKAP13		6.93274e-17	-0.836012	COPB2		3.45914e-18	-0.8264
1016	DCUN1D5		1.39957e-55	-0.256319	PSMB4		5.20931e-49	-0.052442	YIF1A		1.03329e-57	-0.0105603	GSS		1.47088e-22	-0.580567	B4GAT1		6.00686e-18	-0.626642	CTSO		7.07998e-17	-0.835318	TSPAN6	Prognostic genes	3.46661e-18	-0.82612
1017	RAC3		1.60558e-55	-0.256139	LST1		6.76322e-49	-0.0523239	SIKE1		1.25072e-57	-0.010518	COA4		1.51526e-22	-0.580289	ADGRG1		6.05817e-18	-0.626017	FAM53B		7.09169e-17	-0.834019	PRIM2		3.61094e-18	-0.825875
1018	UBALD2		1.66563e-55	-0.255554	METTL5		6.89205e-49	-0.0522338	EIF2S3		1.2876e-57	-0.0104999	NEK7		1.54114e-22	-0.580106	LCLAT1		6.13475e-18	-0.625704	TMEM245		7.35703e-17	-0.833606	METTL18		3.6604e-18	-0.824536
1019	KCNS3	Prognostic genes	1.72945e-55	-0.254453	TMEM92		7.05521e-49	-0.0521588	ARRDC3		1.55668e-57	-0.0104816	DUSP4		1.55884e-22	-0.579679	RRP1		6.16825e-18	-0.625591	FAM166B		7.51788e-17	-0.83213	EGR1		3.71374e-18	-0.824268
1020	CLUAP1	Prognostic genes	1.76936e-55	-0.254224	SLC43A3		7.11558e-49	-0.0518461	RGS17		1.56625e-57	-0.0104259	ZCCHC24		1.56977e-22	-0.57925	LCP1		6.2379e-18	-0.625257	MAGED1		7.85894e-17	-0.830051	MSH2		3.78346e-18	-0.823594
1021	CLDN4		2.23968e-55	-0.253301	BARX2		8.10317e-49	-0.0518294	GPR160	Prognostic genes	1.73373e-57	-0.0103894	UBQLN4		1.6246e-22	-0.578662	MB		6.24983e-18	-0.624746	FUBP1		7.9746e-17	-0.82993	LCLAT1		4.02259e-18	-0.823421
1022	RFX3		2.37171e-55	-0.253289	STARD3		8.87443e-49	-0.05172	HNRNPAB		1.8162e-57	-0.0103625	GCSH		1.64643e-22	-0.577761	POLR1C		6.80756e-18	-0.624082	ZNF692		7.98762e-17	-0.82907	NAT10		4.03537e-18	-0.822251
1023	STEAP4		2.39268e-55	-0.253065	NR2F2		9.88912e-49	-0.0515742	GNG11	Known disease genes	1.86203e-57	-0.0103546	E2F1		1.67103e-22	-0.57686	SRSF1		6.81621e-18	-0.623702	FOXO1		8.01806e-17	-0.827808	CXCL2		4.0729e-18	-0.821453
1024	NET1		2.42121e-55	-0.25219	RPL4		1.3486e-48	-0.0514527	CPM		2.18992e-57	-0.0101875	MYO1C		1.67557e-22	-0.576484	PGAM5		7.11789e-18	-0.623642	NDEL1		8.43286e-17	-0.827144	TTC9C		4.14528e-18	-0.820034
1025	C1orf35		2.43886e-55	-0.25218	CCZ1		1.76495e-48	-0.051226	EIF3M		2.36598e-57	-0.0101784	ARHGAP44		1.67786e-22	-0.575141	MTHFD1L		7.3336e-18	-0.623481	CHST9		8.48993e-17	-0.827053	PMS2		4.17916e-18	-0.819256
1026	YPEL3		2.45043e-55	-0.251872	NINJ1		1.86593e-48	-0.0511157	PODXL2		2.41131e-57	-0.0101192	METTL18		1.74769e-22	-0.575086	MAP7D2		7.50608e-18	-0.623066	HNRNPC		8.77021e-17	-0.826275	PABPC1		4.19612e-18	-0.818015
1027	PSMC2		2.6593e-55	-0.25173	B4GALT2		1.90245e-48	-0.0509843	EHBP1L1		2.48648e-57	-0.010087	BNIP3		1.81883e-22	-0.574766	SRM	Known disease genes	7.56383e-18	-0.62256	CANT1		8.8385e-17	-0.826176	ZNF7		4.35549e-18	-0.81743
1028	BNIP3		2.70016e-55	-0.251668	RAD23A		1.93998e-48	-0.0509493	SLC44A1		3.06528e-57	-0.00997615	RANBP1		1.87912e-22	-0.574524	FKBP3		7.57303e-18	-0.622377	BHLHE41		8.91849e-17	-0.825245	KRTCAP2		4.42078e-18	-0.817423
1029	PA2G4	Prognostic genes	3.85237e-55	-0.251263	IFI35	Prognostic genes	2.01097e-48	-0.0508817	RCC2		3.99753e-57	-0.00996263	DBN1		1.9649e-22	-0.574406	TMEM220		7.71117e-18	-0.622222	CARD6		9.12887e-17	-0.825084	SLC22A18AS		4.72546e-18	-0.816411
1030	PSMA3		3.98238e-55	-0.251093	PFKL		2.10491e-48	-0.0508394	CDC34		5.01438e-57	-0.00988096	POLB		2.04346e-22	-0.574255	LEPROT		8.06746e-18	-0.621913	SLC52A2		9.13884e-17	-0.82418	DPH3		4.76666e-18	-0.816268
1031	POLR2J3		4.07396e-55	-0.250775	EIF3M		2.48467e-48	-0.050825	MYL9		5.29001e-57	-0.00987492	CERS6		2.06909e-22	-0.574041	ACTL6A		8.08552e-18	-0.621758	CHD1L		9.16065e-17	-0.82338	EPHB2		4.81556e-18	-0.815635
1032	P4HTM		4.66721e-55	-0.250441	CSTB		2.70035e-48	-0.05082	HPN		6.01804e-57	-0.00984602	XPOT		2.11282e-22	-0.573209	CHMP3		8.48983e-18	-0.621123	PC		9.27787e-17	-0.823266	PAQR4		5.23684e-18	-0.815521
1033	SSU72		4.87153e-55	-0.249586	PCGF2		2.75821e-48	-0.0507922	TUBA1A		7.35281e-57	-0.00983255	HNRNPAB		2.17161e-22	-0.572413	FAM114A1		8.98499e-18	-0.621049	ATP13A4		9.27867e-17	-0.822862	ATXN2L		5.39279e-18	-0.815004
1034	PPP1R11		4.9456e-55	-0.249231	RNASEH2C		2.9122e-48	-0.0506092	TAF1D		7.81653e-57	-0.00981644	PSMD4		2.19719e-22	-0.572245	SPINK1		8.99298e-18	-0.620443	MRPL9		9.30932e-17	-0.822516	ARHGAP23		5.66512e-18	-0.813474
1035	C14orf132		5.90548e-55	-0.248876	JTB		3.21672e-48	-0.0505427	FKBP3		8.07026e-57	-0.00980683	ITM2C		2.42279e-22	-0.57144	METTL21A		9.01027e-18	-0.619171	SNAP47		9.30932e-17	-0.822104	ETV1		5.96449e-18	-0.813257
1036	PPM1G		6.44222e-55	-0.248751	FUCA1		3.54263e-48	-0.0504885	EIF3F		8.35441e-57	-0.00976562	SPTAN1		2.61191e-22	-0.571197	RNASEH2A		9.93273e-18	-0.617064	DUSP18		9.62304e-17	-0.819164	CLIC4		5.96449e-18	-0.812678
1037	C21orf58		6.8288e-55	-0.248738	KHDRBS1		4.17527e-48	-0.050429	FASN	Known disease genes	8.63767e-57	-0.00974818	TCERG1		2.66586e-22	-0.569739	C8orf76		9.94862e-18	-0.616773	PLBD1		9.70483e-17	-0.818902	CCDC137		6.0357e-18	-0.811888
1038	HELZ2		6.84744e-55	-0.248183	PPA1		4.17775e-48	-0.0503421	PSMB1	Prognostic genes	8.68936e-57	-0.00974188	WDR77		2.67016e-22	-0.569454	ITPKC		1.04852e-17	-0.615842	PRPF3		9.79227e-17	-0.818595	TAPT1		6.04341e-18	-0.811818
1039	CCDC71L		7.00953e-55	-0.248165	DLGAP4		4.62584e-48	-0.050311	CFLAR		9.47805e-57	-0.00969471	UCHL5		2.82259e-22	-0.568905	MRTO4		1.05356e-17	-0.615361	FBXL19		1.0124e-16	-0.818118	MOB3B		6.14134e-18	-0.811564
1040	GNG12		7.92519e-55	-0.247722	MAD2L2		4.82816e-48	-0.0501787	MRPS34		1.00604e-56	-0.00968517	RAB11FIP1		3.10872e-22	-0.568389	AKAP13		1.05356e-17	-0.615326	MORN5		1.02213e-16	-0.816892	SLC35B2		6.14134e-18	-0.810535
1041	ACHE		7.97387e-55	-0.247388	GPATCH4		6.01552e-48	-0.0501365	DNAJC21		1.34163e-56	-0.00967881	MEN1		3.13277e-22	-0.568165	C1orf56		1.08284e-17	-0.614951	DDX52		1.04655e-16	-0.816663	CD44		6.22355e-18	-0.810498
1042	ITGB4		9.11757e-55	-0.247238	MAN2A1		6.19379e-48	-0.0500357	SPA17		1.59649e-56	-0.00964894	C1orf109		3.16672e-22	-0.568122	CTSS		1.11815e-17	-0.614199	COASY		1.06438e-16	-0.816624	METTL21A		6.27047e-18	-0.810383
1043	TMEM98		1.01595e-54	-0.245968	DNAJC2		6.2049e-48	-0.050028	HS6ST2		2.11835e-56	-0.00962723	BET1		3.51193e-22	-0.567862	DUSP12		1.15089e-17	-0.613568	C5orf49		1.09622e-16	-0.814988	SRF		6.28185e-18	-0.809632
1044	IGFBP7		1.07538e-54	-0.245067	PRRC2C		6.35019e-48	-0.0499306	CNP		2.1692e-56	-0.00955725	ANP32E		3.51911e-22	-0.565192	CENPM		1.15475e-17	-0.613556	XPO4		1.10139e-16	-0.814788	NME4		6.35882e-18	-0.809569
1045	ANP32E		1.10259e-54	-0.244848	PTBP1		6.54223e-48	-0.049897	CCT5	Known disease genes	2.2085e-56	-0.00949476	ALDH1B1		3.53735e-22	-0.564693	PPIL1		1.15654e-17	-0.613409	GINM1		1.14663e-16	-0.814215	RHPN1		6.66953e-18	-0.808551
1046	DDX18		1.13268e-54	-0.244833	ARPC3		6.9439e-48	-0.0498847	TFG		2.58714e-56	-0.00946306	DCAF12		3.56147e-22	-0.56452	IL20RA		1.15873e-17	-0.612745	EGR1		1.16848e-16	-0.813296	NFATC3		6.70509e-18	-0.808495
1047	CD36		1.18712e-54	-0.244372	DDOST	Prognostic genes	7.18006e-48	-0.0497373	EDNRB		2.63432e-56	-0.00946207	SEMA4C		3.56184e-22	-0.564097	FOXRED1		1.16193e-17	-0.612696	NUP43		1.20768e-16	-0.812634	CHTOP		6.76566e-18	-0.808182
1048	FOLR1		1.22543e-54	-0.244126	NAT9		7.38669e-48	-0.0497099	SDF2		3.41052e-56	-0.00946188	HOXB7		3.6178e-22	-0.562761	MAGI1		1.16706e-17	-0.612206	UBE2C		1.21373e-16	-0.812601	SLC37A4		6.80015e-18	-0.808062
1049	MAP3K11		1.26193e-54	-0.243932	LYN		8.65162e-48	-0.0496888	NOVA1		4.25324e-56	-0.00943667	VCAN		3.6178e-22	-0.562217	ZBTB41		1.23237e-17	-0.611016	C11orf97		1.22935e-16	-0.812258	CRTAP		7.12332e-18	-0.808056
1050	SLC35B1		1.57848e-54	-0.243555	DGAT1		9.63521e-48	-0.0496467	MRPL32		5.17581e-56	-0.00936789	CBX1		3.72888e-22	-0.562131	NONO		1.26202e-17	-0.610901	LRRC46		1.23466e-16	-0.81127	ZNF587		7.20129e-18	-0.806861
1051	UBE2D2		1.68195e-54	-0.243451	PELO		1.02639e-47	-0.0496333	GAA		5.92984e-56	-0.00935991	ADGRE5		3.88194e-22	-0.562104	STRBP	Known disease genes	1.271e-17	-0.609736	ATAT1		1.29977e-16	-0.811266	NELFCD		7.35017e-18	-0.80657
1052	CDC34		2.11203e-54	-0.242597	FAM89A		1.02672e-47	-0.0496103	IDI1		6.09289e-56	-0.0092884	GRHL1		3.89219e-22	-0.56203	MSH2		1.27389e-17	-0.60953	NPM3	Known disease genes	1.31967e-16	-0.811256	FKBP3		7.44445e-18	-0.805997
1053	B3GNT3		2.19428e-54	-0.242279	MTHFD1L		1.1436e-47	-0.0495745	SFTPD		6.19515e-56	-0.00923545	LAGE3		4.26805e-22	-0.561972	LIG1		1.30391e-17	-0.608452	DROSHA		1.32234e-16	-0.810891	ORC2		7.48739e-18	-0.80523
1054	MIDN		2.19937e-54	-0.241987	DCUN1D5		1.28663e-47	-0.0493407	AUP1		6.96935e-56	-0.00909373	RAB15		4.4068e-22	-0.560447	CDKL5		1.35207e-17	-0.607317	NAT10		1.37023e-16	-0.810489	SEC24D		7.63432e-18	-0.804959
1055	DVL1		2.26608e-54	-0.241935	RHOV		1.3659e-47	-0.04927	PFDN5		7.23283e-56	-0.00908652	ARRB1	Prognostic genes	4.47009e-22	-0.560176	CLIC3		1.36566e-17	-0.606267	PPP2R5A		1.39405e-16	-0.808883	AXL		8.10122e-18	-0.804182
1056	CCDC47	Prognostic genes	2.40085e-54	-0.241933	MYL6B		1.40739e-47	-0.0491187	COL17A1		7.66405e-56	-0.00903983	CHRNB1		4.70548e-22	-0.559272	GTPBP2	Prognostic genes	1.3881e-17	-0.605989	RFC4	Known disease genes	1.41332e-16	-0.808005	TLCD2		8.21167e-18	-0.804056
1057	COX5A		2.43459e-54	-0.241457	TNIP1		1.41621e-47	-0.048997	CXCL14		8.57494e-56	-0.00899947	NDE1		4.93375e-22	-0.558874	ARHGAP23		1.41256e-17	-0.604487	TMTC4		1.43043e-16	-0.807837	EFNB2		8.29592e-18	-0.803077
1058	ACP1		2.92973e-54	-0.240594	GADD45GIP1		1.48604e-47	-0.0489666	CAMK1D		8.63282e-56	-0.00898838	COLEC12		5.12266e-22	-0.558817	FA2H		1.47403e-17	-0.604105	FUT8		1.44054e-16	-0.807107	METAP1		8.43015e-18	-0.802773
1059	MAN2A1		3.64078e-54	-0.240515	CA9		1.52569e-47	-0.0489611	TRAPPC3		9.09836e-56	-0.00898272	MOGS		5.1305e-22	-0.55877	RNF38		1.47866e-17	-0.603908	PRKDC	Known disease genes	1.44179e-16	-0.804771	B4GAT1		8.6752e-18	-0.801431
1060	PUM1		4.29204e-54	-0.240353	C3orf14		1.92774e-47	-0.0489611	CIT		9.9706e-56	-0.00897571	NFXL1		5.15158e-22	-0.557353	SSR4	Prognostic genes	1.49144e-17	-0.603847	RAPGEF2		1.44546e-16	-0.804531	RORA		8.6768e-18	-0.800801
1061	HIGD2A		4.64939e-54	-0.239507	STAP2		2.08475e-47	-0.0489435	IL10RB		1.11617e-55	-0.00888817	ATP2A2		5.18794e-22	-0.557311	SMPDL3B		1.57405e-17	-0.603738	CDS2		1.45056e-16	-0.803634	DUSP12		8.77433e-18	-0.800711
1062	TAF12		4.69096e-54	-0.239437	ZNF414		2.21741e-47	-0.0489295	DNAJA4		1.25849e-55	-0.00873067	SLCO2A1		5.22582e-22	-0.556097	FBXL6		1.58406e-17	-0.603683	GJA1		1.48484e-16	-0.803415	ID3		8.80751e-18	-0.799484
1063	ANG		5.71916e-54	-0.239436	PSMD2	Prognostic genes	2.55755e-47	-0.0488048	DCAF12		1.30211e-55	-0.00869201	GPATCH4		5.43407e-22	-0.555366	TMEM87B		1.63339e-17	-0.603459	NFYA		1.50721e-16	-0.802942	NRGN		8.81149e-18	-0.799471
1064	SPAG16		6.05021e-54	-0.239097	MFHAS1		2.83134e-47	-0.0487393	ARHGDIA		1.43607e-55	-0.00863716	USB1		5.59434e-22	-0.554908	WDR74		1.68114e-17	-0.602463	NAA25		1.62784e-16	-0.802414	NEDD4L		9.0984e-18	-0.798339
1065	CCDC113	Prognostic genes	6.12112e-54	-0.239093	ATXN2L		2.87499e-47	-0.0486962	PFKL		1.50496e-55	-0.00863357	SERTAD1		5.79253e-22	-0.554203	ARHGAP29		1.77892e-17	-0.602461	C6orf118		1.65786e-16	-0.801976	CASP3		9.0984e-18	-0.795941
1066	MRPL27		6.14463e-54	-0.238665	TAF9		2.97456e-47	-0.0486933	SESN1		1.64159e-55	-0.0085388	PHF6		6.29481e-22	-0.553545	TRPT1		1.78237e-17	-0.600067	HEBP1		1.70827e-16	-0.801801	TUBG1		9.17042e-18	-0.794842
1067	SHISA4		6.48655e-54	-0.23853	RAD1		3.10578e-47	-0.0485397	PSMC5		1.74705e-55	-0.00853043	PTK6		6.32743e-22	-0.553322	BIK		1.82863e-17	-0.599763	ANKRD40		1.71011e-16	-0.801654	ARHGEF19		1.06392e-17	-0.794391
1068	DNAJC2		7.68484e-54	-0.238384	KRT17		3.17123e-47	-0.0485084	ZBTB16		1.74779e-55	-0.0085152	FASTKD1		6.45598e-22	-0.552729	CCDC34		1.87678e-17	-0.599463	MTMR6		1.71531e-16	-0.801548	DAPK1		1.07106e-17	-0.794352
1069	SDF2L1		7.88379e-54	-0.238229	TRIM27		3.46704e-47	-0.0485026	PLD3		1.8569e-55	-0.00849126	IQSEC1		6.81445e-22	-0.552483	CHAF1A		1.87959e-17	-0.598698	STX6		1.82128e-16	-0.800971	PCGF3		1.07799e-17	-0.793909
1070	KRT23		8.03723e-54	-0.237735	ABCF1		3.52858e-47	-0.0484398	EML4	Known disease genes	1.95967e-55	-0.00844928	TGFBR3L		7.24291e-22	-0.552296	CUL7		1.91918e-17	-0.598266	PDIA6		1.83519e-16	-0.800959	CSTA		1.08396e-17	-0.793779
1071	UBE2L6		8.29078e-54	-0.234944	NT5DC2		3.59631e-47	-0.0483735	CCDC71L		2.17081e-55	-0.00822511	GNAI2		7.36411e-22	-0.551638	PREB		1.9502e-17	-0.598027	TMEM243		1.85062e-16	-0.800826	LBH		1.11872e-17	-0.793114
1072	HCFC1R1		9.02514e-54	-0.23451	CCT3		3.62432e-47	-0.0483339	TMEM165		2.35024e-55	-0.00820334	STAMBP		7.4176e-22	-0.551205	RPAP3		2.01219e-17	-0.596572	ST3GAL6		1.85062e-16	-0.800265	RASSF3		1.1428e-17	-0.790161
1073	BHLHE40		9.08336e-54	-0.233625	CCDC113	Prognostic genes	3.9648e-47	-0.0482737	ENDOD1		2.51948e-55	-0.00818969	COA1		7.65253e-22	-0.551139	SETD6		2.01758e-17	-0.5965	APOC1		1.87026e-16	-0.800089	RECQL5		1.15741e-17	-0.789654
1074	MEST		9.88302e-54	-0.233343	ZNF207		4.16553e-47	-0.048208	OAS3		2.61853e-55	-0.00817678	DCN		7.97903e-22	-0.551123	PRKDC	Known disease genes	2.11436e-17	-0.596498	DENND4A		1.87437e-16	-0.799414	COASY		1.21954e-17	-0.788995
1075	PDLIM7		1.0522e-53	-0.233225	TMEM106C		4.41937e-47	-0.0481728	ATP1B1	Prognostic genes	2.8811e-55	-0.00814819	ZBED4		8.6596e-22	-0.549814	UBE2S		2.13456e-17	-0.59634	ATP6V1B2		1.88965e-16	-0.799354	WBP4		1.23682e-17	-0.78877
1076	CLIC5		1.15876e-53	-0.232877	ALG3		4.60558e-47	-0.0481423	TMEM14B		2.92521e-55	-0.00811287	NOP56	Known disease genes	8.74909e-22	-0.549476	HPS3		2.14169e-17	-0.595822	DNAJC10		1.92073e-16	-0.798508	DNAJC2		1.32616e-17	-0.788565
1077	NPLOC4		1.31196e-53	-0.232692	COX7C		4.63332e-47	-0.0480914	SMS		3.04627e-55	-0.0080561	SLC39A4		9.38228e-22	-0.548973	SLC22A18		2.28258e-17	-0.595185	SSR4	Prognostic genes	1.92263e-16	-0.796443	MTA3		1.34687e-17	-0.788393
1078	MGST3		1.81793e-53	-0.232556	TAF12		5.12897e-47	-0.0480575	SPOCK2		3.06683e-55	-0.00803564	KRT15		9.45924e-22	-0.548908	TRIT1		2.28473e-17	-0.595184	RTKN		1.96676e-16	-0.79598	ZDHHC3		1.36885e-17	-0.785965
1079	YY1		1.878e-53	-0.231935	EFHC1		5.33361e-47	-0.0479244	PLTP		3.61555e-55	-0.00802058	DCUN1D5		9.6076e-22	-0.54886	C17orf58		2.29931e-17	-0.59439	SPRY4		2.02186e-16	-0.795895	HMGCR		1.37707e-17	-0.785612
1080	NME5		1.90236e-53	-0.231626	ARMC10		6.33674e-47	-0.0478585	SPEF2		3.75905e-55	-0.00799683	TAF4		1.00994e-21	-0.54884	PRR3		2.31449e-17	-0.594191	SYVN1		2.02691e-16	-0.794353	AKAP13		1.38888e-17	-0.784838
1081	SLC16A7		1.92888e-53	-0.23131	ODF3B		6.42392e-47	-0.047745	C12orf45		3.93983e-55	-0.00794069	SDCBP		1.03067e-21	-0.54853	DNMT3A		2.32265e-17	-0.593911	BYSL		2.44626e-16	-0.794293	TRAF5		1.42751e-17	-0.784671
1082	POLR2F		1.93192e-53	-0.230995	TPM3		8.48065e-47	-0.0476326	PROM1		4.22201e-55	-0.00789319	COIL		1.05691e-21	-0.546954	VPS45		2.34888e-17	-0.593626	RHOA		2.56888e-16	-0.7932	FAM222B		1.44012e-17	-0.784477
1083	RGCC		2.10479e-53	-0.230858	HES6		1.17383e-46	-0.0476113	CMPK1		4.3352e-55	-0.00788297	CACYBP		1.07738e-21	-0.546417	C15orf48	Prognostic genes	2.36065e-17	-0.593434	DRAM1		2.58342e-16	-0.792546	ACTL6A		1.4492e-17	-0.78357
1084	PARP9		2.15417e-53	-0.230801	DRAP1		1.24151e-46	-0.0475603	ITGB8		5.08033e-55	-0.00784959	BLOC1S4		1.08134e-21	-0.545859	AIFM1		2.36649e-17	-0.592925	WRAP73		2.89973e-16	-0.790979	CREBL2		1.47164e-17	-0.782983
1085	TES		2.16987e-53	-0.230479	DCAF7		1.28239e-46	-0.0475156	MYOF		6.01309e-55	-0.0077961	WDR45B		1.10185e-21	-0.545188	LBH		2.36649e-17	-0.592847	METAP1		2.96283e-16	-0.789061	SRSF1		1.50922e-17	-0.782469
1086	GORASP2		2.4779e-53	-0.229104	TIMM10	Known disease genes	1.3635e-46	-0.0474895	HIGD2A		6.23713e-55	-0.00775248	C11orf96		1.10185e-21	-0.54414	FBLN1		2.37565e-17	-0.592356	METTL1		3.07179e-16	-0.788839	YWHAZ		1.55752e-17	-0.781471
1087	GNG5		2.48675e-53	-0.227269	SBK1		1.37867e-46	-0.0472363	SLC22A18AS		6.50926e-55	-0.00773913	NFATC1		1.10259e-21	-0.54354	BDH1		2.46686e-17	-0.592167	CA9		3.08325e-16	-0.788417	FMO3		1.61097e-17	-0.78041
1088	ARHGDIA		2.90354e-53	-0.226014	RFK		1.46591e-46	-0.0471976	PLEKHS1		6.65522e-55	-0.00765051	NEDD9		1.11888e-21	-0.543328	PCGF3		2.5015e-17	-0.59125	PCGF3		3.13391e-16	-0.788201	CD37		1.70008e-17	-0.780263
1089	TNRC18		3.3832e-53	-0.225852	CLINT1		1.48013e-46	-0.0467371	MRPL3		1.02871e-54	-0.00757435	CORO1C	Prognostic genes	1.16757e-21	-0.543276	ENTPD6		2.54311e-17	-0.590662	C11orf24		3.18515e-16	-0.787416	LSM8		1.81599e-17	-0.780105
1090	ITPR3		3.55181e-53	-0.225791	C21orf58		1.50964e-46	-0.046716	FAM136A		1.39309e-54	-0.00752589	MED14		1.17374e-21	-0.542656	LSM8		2.56973e-17	-0.590489	CKAP5		3.19684e-16	-0.786756	PITPNA		1.8161e-17	-0.779926
1091	AP3D1		3.83583e-53	-0.225666	SHROOM4		1.65334e-46	-0.0466677	COL18A1		1.62384e-54	-0.00751684	DDX27		1.18397e-21	-0.542541	FHDC1		2.56998e-17	-0.590323	MYO9A		3.2457e-16	-0.785928	PIGM		1.82778e-17	-0.77851
1092	P3H4		4.45218e-53	-0.225043	SNX6		1.68381e-46	-0.0466439	CSDE1		1.62951e-54	-0.0074289	FTSJ1		1.20548e-21	-0.541692	WDR77		2.58514e-17	-0.59017	SOD3		3.29711e-16	-0.784835	KPNB1		1.83134e-17	-0.778495
1093	CCT5	Known disease genes	4.48836e-53	-0.224804	SERBP1		1.77247e-46	-0.0466154	SNX21		1.98759e-54	-0.00732631	NPEPPS		1.21718e-21	-0.54119	TTPAL		2.58626e-17	-0.589557	CNPY2		3.30346e-16	-0.784761	SMG5		1.97528e-17	-0.776457
1094	BID		4.62554e-53	-0.223952	GORASP2		1.96574e-46	-0.0465572	DDX21		2.02593e-54	-0.00727778	TRAF2		1.26008e-21	-0.54057	DSP		2.64341e-17	-0.589383	NR4A1		3.31937e-16	-0.784205	ZBTB41		2.02274e-17	-0.776306
1095	RANBP1		4.69856e-53	-0.223843	PSMD3		2.00067e-46	-0.0464651	POLR2F		2.1105e-54	-0.00722718	PIP5KL1		1.32717e-21	-0.53873	C1orf109		2.64341e-17	-0.589037	AKAP12		3.51594e-16	-0.784139	SEC61A1		2.05123e-17	-0.775866
1096	ADAM15		5.24107e-53	-0.223222	GPRC5C	Prognostic genes	2.01027e-46	-0.0463841	UGP2		2.18073e-54	-0.00720762	COA6		1.42709e-21	-0.538682	PLPP5		2.66805e-17	-0.588507	C22orf39		3.53133e-16	-0.784099	NUMB		2.05549e-17	-0.775518
1097	UBXN11		5.84829e-53	-0.222704	MRPL21		2.0107e-46	-0.0462778	EFNA4		2.50204e-54	-0.00718574	ETS1		1.45513e-21	-0.538316	DPP3		2.67327e-17	-0.588008	DNMT3A		3.57356e-16	-0.782026	CRK		2.05644e-17	-0.774265
1098	FNBP1L		6.10648e-53	-0.221872	SPAG4		2.13447e-46	-0.0461891	ZNHIT3		2.55073e-54	-0.00715641	CDADC1		1.47664e-21	-0.538239	ZNF587		2.73207e-17	-0.588003	TTF2		3.65964e-16	-0.781486	LRRC20		2.09263e-17	-0.774029
1099	CLIC1		6.47274e-53	-0.221829	MEX3A		2.21968e-46	-0.0458904	RGS16		2.62172e-54	-0.00714113	TWF1		1.50223e-21	-0.538132	PPP1R35		2.74319e-17	-0.587733	CITED2		3.71692e-16	-0.780946	DOCK8		2.14827e-17	-0.773412
1100	SBNO2		6.60158e-53	-0.221335	ZNF277		2.27628e-46	-0.0458824	CDKN2B	Known disease genes	2.75768e-54	-0.00710401	MPHOSPH9		1.50483e-21	-0.538	CD2AP		2.76432e-17	-0.586835	MSRA		3.78359e-16	-0.779991	POLR1C		2.19442e-17	-0.772788
1101	RRP36		6.70153e-53	-0.220949	DDX42		2.32773e-46	-0.0456312	EIF4EBP1		3.05982e-54	-0.00708392	RAE1		1.51523e-21	-0.537583	DNAJC27	Prognostic genes	2.81621e-17	-0.585732	VSIG10		3.86796e-16	-0.779572	STX6		2.19953e-17	-0.772287
1102	RAB5C		8.9029e-53	-0.220743	JUNB	Known disease genes	2.51068e-46	-0.0453552	LYN		3.24786e-54	-0.00706993	NEK6		1.53598e-21	-0.537392	ATP6V1B2		2.88151e-17	-0.585378	LTC4S		3.92793e-16	-0.779425	DNAJC27	Prognostic genes	2.24592e-17	-0.772099
1103	AIMP2		9.65182e-53	-0.220132	DHFR		2.78889e-46	-0.0452516	SERPING1		3.34366e-54	-0.00702915	ANKRD39		1.53791e-21	-0.537048	DNAJC10		2.90061e-17	-0.584573	MRPL19		3.95416e-16	-0.777292	CDKN2B	Known disease genes	2.26803e-17	-0.771328
1104	NAB2		1.08032e-52	-0.220084	NUCKS1		2.8416e-46	-0.0451088	RFXANK		3.46718e-54	-0.00700222	LCN2		1.57634e-21	-0.536567	CRELD2		2.91821e-17	-0.584397	ESYT3		4.2251e-16	-0.77675	LCOR		2.41236e-17	-0.771315
1105	SEMA4B		1.41274e-52	-0.219962	CNPY2		2.84534e-46	-0.0450544	OSCP1	Prognostic genes	3.59645e-54	-0.00695796	B3GNT2		1.58515e-21	-0.535959	ORC2		3.06823e-17	-0.581627	CACHD1		4.2251e-16	-0.776394	DAP		2.44429e-17	-0.770552
1106	SLC27A2		1.45275e-52	-0.219409	ARRDC3		2.90246e-46	-0.045019	ACADL		3.94215e-54	-0.00694121	MTFP1		1.67201e-21	-0.535894	PDZD11		3.08038e-17	-0.580509	CYB5R3		4.26061e-16	-0.775975	EMP3		2.45452e-17	-0.770451
1107	PNMA2		1.74946e-52	-0.219122	SHC2		2.94853e-46	-0.0449363	RAN		4.66416e-54	-0.00693926	OSTM1		1.70635e-21	-0.535507	TTC9C		3.13195e-17	-0.580045	ALDOA	Known disease genes	4.56173e-16	-0.775082	DHRS11		2.53188e-17	-0.769755
1108	NRIP1		1.89892e-52	-0.219041	AUP1		3.2254e-46	-0.0449017	ECH1		5.23868e-54	-0.00687429	MCM3		1.76232e-21	-0.535113	FCGR3A		3.13715e-17	-0.578862	BTG2		4.64028e-16	-0.775019	PPP6C	Prognostic genes	2.58306e-17	-0.768473
1109	PLAC8		1.90886e-52	-0.218855	PTN		3.23261e-46	-0.0448236	PUM1		5.88538e-54	-0.00687021	EFEMP1		1.77411e-21	-0.534995	GSS		3.15442e-17	-0.578426	CABLES1	Prognostic genes	4.64168e-16	-0.773715	STT3A		2.72277e-17	-0.765922
1110	GOLGA2		2.52035e-52	-0.218061	LTBP3		3.24194e-46	-0.0447817	ST3GAL5		6.01022e-54	-0.00683928	PRRX2		1.86551e-21	-0.534592	DNAJC2		3.24395e-17	-0.57835	RGS17		4.74278e-16	-0.773072	IRAK1BP1		2.84166e-17	-0.765259
1111	RAB15		2.64489e-52	-0.217591	BIRC3		3.37429e-46	-0.0446909	LMAN2		6.10173e-54	-0.00678699	YKT6		1.88663e-21	-0.534013	UBQLN4		3.2795e-17	-0.577608	AARSD1		4.78953e-16	-0.772346	PUS7L		2.93164e-17	-0.764864
1112	FKBP10		2.64489e-52	-0.216888	CACNB3		3.38101e-46	-0.0446352	PPP1CB		6.36528e-54	-0.00667006	KDM1A		1.88663e-21	-0.533853	TNFAIP1		3.32128e-17	-0.577055	NIPSNAP3A		4.96975e-16	-0.772074	ISG20L2		2.9505e-17	-0.764695
1113	FAM234A		2.9087e-52	-0.216704	CSNK1A1		3.47424e-46	-0.0445109	MEA1		8.85311e-54	-0.00664846	COPG1		1.90402e-21	-0.533676	FASTKD3		3.32911e-17	-0.575835	NOTCH1		4.98387e-16	-0.771431	GCSH		3.34484e-17	-0.764539
1114	HNRNPD		2.92301e-52	-0.216591	TRNAU1AP		3.50351e-46	-0.044437	SLC52A2		9.35132e-54	-0.00664246	COL9A2		1.93292e-21	-0.532306	TDRD3		3.33963e-17	-0.574955	DMD		5.01064e-16	-0.770483	NR4A1		3.39258e-17	-0.763895
1115	SMARCA4		3.27959e-52	-0.216442	NME5		3.59599e-46	-0.0444287	PSMD3		9.36249e-54	-0.00649486	NETO2		1.94038e-21	-0.53146	CKAP5		3.37627e-17	-0.574699	ERICH2		5.0318e-16	-0.769918	RNF11		3.44274e-17	-0.763405
1116	SRP19		3.59387e-52	-0.215835	LLGL2		3.87295e-46	-0.0441316	MTA1		9.4049e-54	-0.00640033	PSMD14		1.96616e-21	-0.531145	CASP3		3.42306e-17	-0.574517	BTN3A3		5.15841e-16	-0.769787	NSUN5		3.47375e-17	-0.762734
1117	DNAL1		4.34979e-52	-0.214974	DFFA		3.94246e-46	-0.0440744	UBE2Z	Prognostic genes	9.60814e-54	-0.00628728	LIFR		1.97429e-21	-0.53057	AP1S2		3.45071e-17	-0.57376	RASSF1		5.18205e-16	-0.768745	CANT1		3.53217e-17	-0.762633
1118	SMURF2		5.37271e-52	-0.214928	MACC1		4.55945e-46	-0.0440057	NOTCH3		1.15033e-53	-0.00616311	SIK2		2.017e-21	-0.52997	STAMBP		3.52222e-17	-0.573221	TFRC		5.29197e-16	-0.768119	C15orf48	Prognostic genes	3.56055e-17	-0.760979
1119	TRAF4		6.6263e-52	-0.21476	KCNS3	Prognostic genes	4.9434e-46	-0.0438043	PSAP		1.38722e-53	-0.00615847	SCAI		2.05928e-21	-0.529793	CHPF		3.52985e-17	-0.572978	HMGCS1		5.48867e-16	-0.767439	THSD4		3.65144e-17	-0.760433
1120	OXA1L		7.06095e-52	-0.214706	ADORA1		4.97807e-46	-0.043436	CLCF1		1.436e-53	-0.00612245	SLC27A3		2.06177e-21	-0.528688	CDK5RAP1		3.65895e-17	-0.572809	EVI5		5.59699e-16	-0.767266	PSMD11		3.88897e-17	-0.759673
1121	SRRM1		7.42627e-52	-0.214653	PTP4A2	Prognostic genes	5.0418e-46	-0.0434183	TMEM45B		1.66343e-53	-0.006092	SACM1L		2.10846e-21	-0.528592	LIMK1		3.67518e-17	-0.572458	SPAG6		5.72109e-16	-0.767164	TSPAN9		4.07202e-17	-0.759623
1122	CREB3L2		8.02276e-52	-0.214499	HSD17B11		5.23129e-46	-0.043184	LDOC1		1.89135e-53	-0.00607176	RBM12B		2.1186e-21	-0.527918	SIX1		3.88908e-17	-0.572437	CASP6		5.73906e-16	-0.766629	FUBP1		4.26165e-17	-0.759165
1123	TCTN1		9.81322e-52	-0.214179	KRT8		5.46825e-46	-0.0431657	DNAJC2		2.12021e-53	-0.00606956	CCDC43		2.12132e-21	-0.525895	METTL18		3.9149e-17	-0.572239	SLC39A7		5.84379e-16	-0.76652	VSIG2		4.45703e-17	-0.758704
1124	PHF19		1.05426e-51	-0.214137	RNF7		5.62619e-46	-0.0431642	POLDIP2		2.24953e-53	-0.00606565	STX2		2.20073e-21	-0.524257	PARD6B		3.99266e-17	-0.570903	TNFAIP1		5.97156e-16	-0.76465	PLEKHA1		4.58676e-17	-0.758601
1125	TLCD1		1.12367e-51	-0.214033	ANKRD36C		6.09845e-46	-0.0430519	PCDH7		2.50599e-53	-0.00605773	GRHL2		2.29984e-21	-0.522102	C1orf35		4.02593e-17	-0.570478	CD53		6.1244e-16	-0.764516	SCG5		4.59544e-17	-0.758356
1126	DHRS7		1.45021e-51	-0.213944	PDLIM4		6.34922e-46	-0.0430411	HSD17B6		2.58715e-53	-0.00603319	DHFR		2.34244e-21	-0.520406	MOGS		4.15209e-17	-0.569951	TSC22D1		6.14978e-16	-0.762945	GJA1		4.62394e-17	-0.758122
1127	SGPP2		1.51051e-51	-0.21372	SLC2A3		6.81529e-46	-0.0428187	TFAP2A		3.89798e-53	-0.00601105	ABCA3		2.40379e-21	-0.520351	NCAPD3		4.18345e-17	-0.569265	SRGN		6.28056e-16	-0.762186	LAPTM4B		4.66312e-17	-0.757506
1128	BRIX1		1.79082e-51	-0.213591	ORMDL3		7.00206e-46	-0.0427804	MYDGF		3.94576e-53	-0.00588213	C1QA		2.64347e-21	-0.5203	RHOV		4.32442e-17	-0.566217	HNRNPAB		6.61887e-16	-0.761561	CHI3L2		4.77041e-17	-0.757421
1129	DNAJC21		1.99731e-51	-0.21293	TMEM62		7.38504e-46	-0.042656	PPM1G		3.96259e-53	-0.00584235	RGS14		2.65076e-21	-0.520081	NMRAL1		4.32442e-17	-0.565869	CBLC		6.72453e-16	-0.761473	CISD2		4.94101e-17	-0.757079
1130	SNX6		2.13025e-51	-0.212912	KNOP1		1.01327e-45	-0.0425935	ANGPTL4		4.39155e-53	-0.00580904	FAM3C		2.72533e-21	-0.51902	C16orf87		4.36069e-17	-0.565695	KRT16		6.94504e-16	-0.760929	ORC5		5.10926e-17	-0.754708
1131	NOC2L		2.47009e-51	-0.212415	TPT1		1.11976e-45	-0.042531	IFITM1		4.53548e-53	-0.0057376	KRT8		2.78206e-21	-0.518977	PLAU	Prognostic genes	4.4052e-17	-0.565629	CTSS		7.04546e-16	-0.760566	LSS		5.38763e-17	-0.754068
1132	AKR1C2		2.55838e-51	-0.212171	IER2		1.19017e-45	-0.0425146	ITGA1		5.30012e-53	-0.00571262	SBDS		2.8963e-21	-0.51859	DHCR24		4.44199e-17	-0.563841	GTF2IRD1		7.10806e-16	-0.760531	SETD3		5.40568e-17	-0.750154
1133	FASN	Known disease genes	3.01284e-51	-0.211896	DUSP8		1.19875e-45	-0.0424492	SLC39A11	Prognostic genes	5.42331e-53	-0.0056081	ZDHHC18		2.91008e-21	-0.518049	TOM1L1		4.45293e-17	-0.563568	KIAA1328		7.23134e-16	-0.759345	MBP		5.44258e-17	-0.75003
1134	IER2		3.26501e-51	-0.21112	GOLT1A		1.24093e-45	-0.0420166	FAM120A		5.5274e-53	-0.00549285	TYROBP		3.06121e-21	-0.517902	CYB5R3		4.72587e-17	-0.561503	ANKRD44		7.2801e-16	-0.758836	ATAD3A		5.50351e-17	-0.749725
1135	IER5		3.39716e-51	-0.2111	TIPARP		1.27683e-45	-0.0419736	IER5		5.61219e-53	-0.00542284	VIM		3.06121e-21	-0.517068	COIL		4.78793e-17	-0.561436	DNAL1		8.02629e-16	-0.757647	HOOK1		5.57059e-17	-0.749721
1136	NAT9		3.44607e-51	-0.210817	BCL9L		1.73082e-45	-0.0417482	AVL9		5.69329e-53	-0.00535837	ABCC10		3.06121e-21	-0.516598	ZBED4		4.89588e-17	-0.560783	WWC3		8.10273e-16	-0.757541	TMEM245		5.61661e-17	-0.749306
1137	ENAH		3.44635e-51	-0.210649	SLC35B1		1.78719e-45	-0.0416842	ARMC10		6.58776e-53	-0.00532929	ZFYVE19		3.06472e-21	-0.51631	HNRNPAB		4.90054e-17	-0.560316	ZC3H8		8.20516e-16	-0.756196	BTG2		5.61661e-17	-0.748587
1138	GLRX5		3.54455e-51	-0.210555	ZNF322		1.84661e-45	-0.0415993	MLLT6		7.76351e-53	-0.00500345	NDUFAF6		3.06472e-21	-0.515747	METTL7B		4.90497e-17	-0.560281	PTPRG		8.31441e-16	-0.755843	CYB5R3		5.83239e-17	-0.74774
1139	IFI44L		4.0061e-51	-0.210154	MRPL32		1.94586e-45	-0.0414574	CDV3		1.02295e-52	-0.00478679	MYL6B		3.17558e-21	-0.515604	SLX4IP		4.90994e-17	-0.559488	TPI1	Known disease genes / Prognostic genes	8.38286e-16	-0.75261	DRAM1		6.05859e-17	-0.747101
1140	PPP1R35		4.10241e-51	-0.20917	DDX21		1.97717e-45	-0.0414558	MFSD2A		1.12575e-52	0.00481605	NOC2L		3.39576e-21	-0.51533	PHLDB2		4.92713e-17	-0.559026	BCS1L		8.43312e-16	-0.752179	PAK6		6.14942e-17	-0.746968
1141	DNAJA4		4.58851e-51	-0.209138	P3H2		2.10326e-45	-0.0413455	TLCD1		1.1467e-52	0.00487017	C1QB		3.51358e-21	-0.515271	PKIG		5.0616e-17	-0.558723	PRMT3		8.52913e-16	-0.751636	EFNB1		6.34919e-17	-0.745453
1142	HSP90B1		4.64502e-51	-0.2091	MT-ND5		2.1983e-45	-0.0413183	RANBP1		1.1467e-52	0.00501268	IDE		3.56034e-21	-0.514744	SUSD2		5.33188e-17	-0.558287	BRI3BP		8.57787e-16	-0.750898	C17orf58		6.47207e-17	-0.745234
1143	LDOC1		4.7491e-51	-0.209031	SNRNP25		2.2429e-45	-0.0412565	RAB36		1.19022e-52	0.00512736	BCL2L12		3.65185e-21	-0.514195	IRF7		5.36823e-17	-0.557654	VMO1		8.57787e-16	-0.75009	KCNJ15		6.47238e-17	-0.744725
1144	ARFGEF3		4.88787e-51	-0.208969	TOMM40	Known disease genes	2.39509e-45	-0.0412343	MRPL9		1.19804e-52	0.00513511	LIMD1		3.66422e-21	-0.514044	TJP2		5.39752e-17	-0.55755	DOLPP1		8.63961e-16	-0.749845	NSMF		6.66456e-17	-0.744269
1145	LIMA1		6.25293e-51	-0.208708	NFATC4		3.1566e-45	-0.041139	HSD17B11		1.2342e-52	0.00514344	TJP1		3.72506e-21	-0.513023	DPH3		5.46972e-17	-0.556438	SFTPA2		9.07936e-16	-0.747648	PLPP5		6.77128e-17	-0.744131
1146	RABIF		9.36917e-51	-0.207703	DTX3L		3.22759e-45	-0.0410877	PPP1CA		1.40247e-52	0.00522184	ARFGAP1		3.83145e-21	-0.512332	NDNF		5.49665e-17	-0.554733	ZMIZ1		9.22268e-16	-0.746939	CASP1		6.84736e-17	-0.744033
1147	ICAM2		1.04171e-50	-0.207388	DSG2		3.36875e-45	-0.0410736	HLA-F		1.59882e-52	0.00525003	HLTF		3.91843e-21	-0.511317	DSG2		5.57359e-17	-0.554391	XPA		9.25526e-16	-0.74645	LIMK1		6.95159e-17	-0.743431
1148	LYPLA1		1.05649e-50	-0.207357	JUND		3.38538e-45	-0.041046	EI24		1.73596e-52	0.00532628	ANKRD29		4.02738e-21	-0.51123	NDUFAF7		5.5964e-17	-0.554161	ALDH1A1		9.36599e-16	-0.746208	NCF1		6.96887e-17	-0.740869
1149	CRTAC1		1.07061e-50	-0.207178	ZDHHC18		3.52954e-45	-0.0409301	KCNK5		1.78882e-52	0.00541341	ZNF212		4.04431e-21	-0.50941	EED		5.6929e-17	-0.552742	KDM1A		9.4303e-16	-0.746084	ARID5A		7.00721e-17	-0.740764
1150	FAM120A		1.1673e-50	-0.206999	ZFAND3	Prognostic genes	3.55231e-45	-0.0408117	IL32		2.30357e-52	0.00541371	TBC1D7		4.14077e-21	-0.508957	DIAPH2		5.8947e-17	-0.552288	FAM83H		9.47898e-16	-0.745771	WDR47		7.01567e-17	-0.739554
1151	SRP72		1.26845e-50	-0.206838	CDV3		3.58943e-45	-0.0407948	C4BPB		2.60814e-52	0.00544367	DAB2IP		4.26355e-21	-0.507942	RNF207		5.96099e-17	-0.551404	HSH2D	Prognostic genes	9.55008e-16	-0.745485	TDRD3		7.1017e-17	-0.738554
1152	TBL1XR1		1.28872e-50	-0.206502	RUSC1		3.73542e-45	-0.0407316	NT5C3B		2.6953e-52	0.00544788	LRIF1		4.47618e-21	-0.507234	SLC9A7		5.96099e-17	-0.551217	KRT80		9.6789e-16	-0.745208	C1orf109		7.17454e-17	-0.737888
1153	RASSF9		1.29328e-50	-0.206446	GLMP		3.93258e-45	-0.0407078	AP2B1		2.85914e-52	0.0055456	PPM1G		4.49764e-21	-0.506669	CEACAM5		6.09342e-17	-0.55066	F12		9.90207e-16	-0.744458	PHF2		7.23395e-17	-0.737155
1154	SMS		1.32556e-50	-0.20591	TIPRL		5.25069e-45	-0.0406507	KRT15		3.05671e-52	0.00556086	ATXN7L3		4.50437e-21	-0.506434	RFC5		6.13464e-17	-0.54984	C12orf45		9.90715e-16	-0.744447	TAF4		7.31892e-17	-0.737133
1155	PMM1	Prognostic genes	1.36558e-50	-0.205702	CLDN4		5.46247e-45	-0.0406232	PA2G4	Prognostic genes	4.15754e-52	0.00556738	PPP2CB		4.65891e-21	-0.505678	DUSP8		6.45368e-17	-0.54934	SLFN13		1.00583e-15	-0.744194	FASTKD3		7.52971e-17	-0.736944
1156	SPOCK2		1.40753e-50	-0.205618	CTSE		6.12879e-45	-0.0406219	UBE2D2		4.909e-52	0.00559857	XYLT2		4.65934e-21	-0.50519	MEN1		6.48881e-17	-0.549254	TMED2		1.0442e-15	-0.743449	LZTFL1		7.64723e-17	-0.735998
1157	TOP1		1.4671e-50	-0.205381	SIPA1L2		6.39292e-45	-0.0405902	EMP2		5.17635e-52	0.00560054	NUDT8		5.33523e-21	-0.504795	NOTCH1		6.59229e-17	-0.54878	CD2AP		1.04436e-15	-0.740571	PARVB		7.73381e-17	-0.735517
1158	STOML2		1.48187e-50	-0.204866	GGCX		6.92085e-45	-0.0405434	SRRM2		5.32886e-52	0.00560891	MRPL36		5.63521e-21	-0.504712	ORC5		6.6339e-17	-0.548736	PXMP4		1.04866e-15	-0.739096	PDZD11		7.85811e-17	-0.735451
1159	ARPC5L	Prognostic genes	1.73278e-50	-0.20474	NTN4		7.19339e-45	-0.0402721	DNAH7		6.15063e-52	0.0056458	LMNB2		5.70061e-21	-0.504234	PHF2		6.73807e-17	-0.547617	RBM28		1.06571e-15	-0.738204	APOC1		8.21747e-17	-0.73518
1160	YTHDF2		1.73278e-50	-0.204693	HOOK2		7.2984e-45	-0.0401875	ZNF117		7.51255e-52	0.00568814	MRPL30		5.82029e-21	-0.503507	CD37		6.95273e-17	-0.547011	NME4		1.08008e-15	-0.738191	RP2		8.64779e-17	-0.732681
1161	IFT43		1.73333e-50	-0.204414	SDF4		7.56128e-45	-0.0400441	EPHB2		7.88033e-52	0.00570136	DENND5A		6.25656e-21	-0.503373	USB1		7.32911e-17	-0.546984	PUS1		1.12093e-15	-0.737834	CTTN		9.16761e-17	-0.731918
1162	OPN3		1.80135e-50	-0.203824	PSMB9		8.44619e-45	-0.0400031	CNN2		8.13961e-52	0.00570142	INTS4		6.46778e-21	-0.503308	ATXN7L3		7.51883e-17	-0.546148	NOP2		1.12629e-15	-0.736652	CDKN1C		9.24865e-17	-0.731584
1163	IFNAR2		1.89046e-50	-0.203382	SLIRP		8.93758e-45	-0.0393667	SFTPA1		8.19339e-52	0.00570936	APOL3		6.72161e-21	-0.502862	P3H2		7.56185e-17	-0.545291	KIF6		1.13399e-15	-0.736417	HSP90B1		9.47302e-17	-0.730353
1164	TSPAN5		1.89213e-50	-0.202739	SWAP70		8.93844e-45	-0.0393365	LSM7		9.69116e-52	0.00578349	CCNO		6.72221e-21	-0.501984	UCHL5		7.59995e-17	-0.545245	CALU		1.15066e-15	-0.733552	VPS45		9.62621e-17	-0.729742
1165	CANX	Prognostic genes	1.99591e-50	-0.202158	STX10		9.03616e-45	-0.0392602	YY1		1.01619e-51	0.005811	EFNA5		6.90516e-21	-0.501739	DCAF12		7.70351e-17	-0.545042	SYT12		1.18862e-15	-0.732248	VPS72		9.76399e-17	-0.728642
1166	EFNA4		2.25909e-50	-0.201553	PURB		9.4583e-45	-0.0392332	POLR2J3		1.06786e-51	0.00582737	CYP2U1		7.01421e-21	-0.501514	CDH1		7.7291e-17	-0.544624	SFTPA1		1.19297e-15	-0.730719	MAP7D2		9.83324e-17	-0.72805
1167	ERH		2.5054e-50	-0.200968	R3HDM4		1.02327e-44	-0.0392096	TNIP1		1.15278e-51	0.00584752	GLRX3		7.26622e-21	-0.501398	KIFC2		7.76168e-17	-0.543343	LIMK1		1.20222e-15	-0.730678	MTX1		9.85872e-17	-0.727479
1168	NT5DC2		2.51141e-50	-0.200576	DNAJC4		1.03129e-44	-0.0391814	ITM2C		1.15656e-51	0.00587563	FAM189B		7.4088e-21	-0.50122	MRPL15		8.03797e-17	-0.543237	AAMDC		1.2119e-15	-0.730569	FGD4		1.00539e-16	-0.726901
1169	RNPS1		3.2375e-50	-0.20048	OAZ1		1.03495e-44	-0.039152	COA6		1.16042e-51	0.00587751	ZNF480		7.62517e-21	-0.500991	PUS7L		8.09178e-17	-0.542432	IL1B		1.22164e-15	-0.72688	CDK5RAP1		1.00637e-16	-0.726835
1170	RPL6		3.40952e-50	-0.200114	PODXL2		1.53205e-44	-0.0391441	CTSE		1.37565e-51	0.00588878	UBXN4		7.7507e-21	-0.499534	ATP2A2		8.166e-17	-0.542186	SGMS2		1.26263e-15	-0.726741	RPAP3		1.03691e-16	-0.726217
1171	AHCYL1		3.44659e-50	-0.200022	SSBP1		1.79278e-44	-0.0391128	SNX6		1.46286e-51	0.00590641	FOXA1		7.84404e-21	-0.498778	IER5L		8.6688e-17	-0.541892	NKG7		1.37892e-15	-0.72672	SPDEF		1.09194e-16	-0.724778
1172	DPCD		3.66564e-50	-0.199088	PSME3		1.85225e-44	-0.0390648	EVA1B		1.58095e-51	0.00591558	PAK6		8.04766e-21	-0.498582	ENC1		8.80896e-17	-0.541533	SYDE2		1.40935e-15	-0.726029	SRGN		1.10128e-16	-0.723899
1173	RWDD1		3.9657e-50	-0.199034	C17orf97		1.85608e-44	-0.0390241	YWHAQ		1.76171e-51	0.00595267	PSMB4		8.09502e-21	-0.498553	MCM7		8.83446e-17	-0.541129	NPEPPS		1.41677e-15	-0.724931	TCERG1		1.11954e-16	-0.723655
1174	CCDC137		4.01331e-50	-0.198805	SHC1		1.98816e-44	-0.0389976	AMIGO2		1.76796e-51	0.00597526	MAGOHB		8.49436e-21	-0.497517	ACOT11		9.3832e-17	-0.540607	RNF34		1.57573e-15	-0.724843	CITED2		1.12565e-16	-0.723433
1175	CEACAM1		4.48225e-50	-0.198552	MAPKAPK2		2.07845e-44	-0.0389081	PSMD13		1.95453e-51	0.00606168	PKM	Prognostic genes	8.71686e-21	-0.496941	GTPBP3		1.05279e-16	-0.539937	ILK		1.58146e-15	-0.724408	TPSB2		1.13e-16	-0.723083
1176	GPS1		5.49073e-50	-0.198506	GRB10		2.07903e-44	-0.0388384	TYROBP		2.04503e-51	0.00608296	LPCAT3		8.86403e-21	-0.496162	COA4		1.10723e-16	-0.539559	UVRAG		1.61636e-15	-0.722151	C16orf87		1.14125e-16	-0.722429
1177	MRPL9		5.62965e-50	-0.198405	TFAP2A		2.81818e-44	-0.0388183	ERAP2		2.34673e-51	0.0060916	CLPTM1L	Known disease genes / Prognostic genes	9.00516e-21	-0.496121	PSMD4		1.10741e-16	-0.53954	DBF4		1.66814e-15	-0.721198	SYVN1		1.1431e-16	-0.71986
1178	CAPN2		6.38469e-50	-0.197594	SET	Prognostic genes	2.83346e-44	-0.0388029	MRPL57		2.76911e-51	0.00610609	HHIP		9.03458e-21	-0.496102	NPEPPS		1.10871e-16	-0.539239	ACSL4	Known disease genes	1.67944e-15	-0.720607	NQO1		1.15839e-16	-0.719126
1179	OSTC		6.38749e-50	-0.197541	CALM1		2.83835e-44	-0.0385311	GNG5		2.77512e-51	0.00612426	SLC12A7		9.89506e-21	-0.496086	STK32A		1.15099e-16	-0.538956	STIP1		1.71178e-15	-0.720493	STAMBP		1.23323e-16	-0.718235
1180	JUP		6.52351e-50	-0.197455	SUN1		2.91845e-44	-0.038526	SLC16A9		3.1417e-51	0.00612887	SNRNP25		1.01047e-20	-0.495754	MTURN	Prognostic genes	1.16118e-16	-0.538899	FBXO32		1.76757e-15	-0.720156	ECHDC1		1.24914e-16	-0.718072
1181	NARF		8.75833e-50	-0.196921	PYGB		3.02101e-44	-0.0384515	WASF2		3.1417e-51	0.00615386	LSM12		1.01641e-20	-0.495072	ST6GALNAC2		1.1612e-16	-0.538894	ISG20L2		1.81021e-15	-0.720103	MESP1		1.25739e-16	-0.718002
1182	TMEM165		9.03651e-50	-0.196649	ZNF146		3.15958e-44	-0.0384489	TAF7		3.17384e-51	0.00615448	TAF2		1.05086e-20	-0.494306	TSKU		1.17405e-16	-0.538184	SELENBP1	Prognostic genes	1.93044e-15	-0.719669	TFRC		1.27063e-16	-0.717666
1183	SLC44A1		9.52825e-50	-0.196156	KPNA2	Known disease genes / Prognostic genes	3.17991e-44	-0.0383904	DBNL		3.25651e-51	0.0061808	NR2F6		1.077e-20	-0.49429	CALU		1.20078e-16	-0.53791	ACTL6A		1.93067e-15	-0.718417	AP1S1		1.30609e-16	-0.715324
1184	CCDC85B		9.90286e-50	-0.195803	COASY		3.65456e-44	-0.0383073	MSN		3.40153e-51	0.00618134	EGR1		1.12721e-20	-0.494097	SDC2		1.21034e-16	-0.537739	DSP		1.9439e-15	-0.718136	CKAP5		1.3108e-16	-0.71458
1185	PPP2R5E		1.34617e-49	-0.195684	COL18A1		3.70064e-44	-0.0382002	DHCR24		4.76448e-51	0.00619793	CLTC		1.13357e-20	-0.49395	POLE		1.21702e-16	-0.537102	CLTC		1.94426e-15	-0.71724	SELENBP1	Prognostic genes	1.32519e-16	-0.711356
1186	DAGLB		1.54577e-49	-0.195486	MAP3K11		3.97719e-44	-0.0381772	TNFRSF10B		5.12973e-51	0.0062424	CISD2		1.18858e-20	-0.49319	CCT6A		1.24821e-16	-0.536637	TTC13		2.00934e-15	-0.716897	SLC9A7		1.32761e-16	-0.710064
1187	UBXN10		1.5753e-49	-0.19506	INTS1		4.32449e-44	-0.0380865	NTMT1	Prognostic genes	5.73813e-51	0.00627174	SHC3		1.1926e-20	-0.492651	FTSJ1		1.25495e-16	-0.53632	SIRT7		2.01629e-15	-0.716862	SLC29A4		1.3552e-16	-0.709864
1188	ARHGEF16		1.61784e-49	-0.194689	CEP126		4.39721e-44	-0.0379489	ARL6IP5		6.06948e-51	0.00628638	SCRIB		1.19869e-20	-0.492285	KDM1A		1.27751e-16	-0.536022	FKBP3		2.06244e-15	-0.715719	TTPAL		1.35862e-16	-0.709653
1189	AP2S1	Prognostic genes	1.77037e-49	-0.19454	DAGLB		4.50242e-44	-0.0378618	FUCA1		7.33495e-51	0.00630084	SH3D19		1.21479e-20	-0.491971	QDPR		1.35125e-16	-0.535678	TRIM11		2.10018e-15	-0.714488	ATP6V1B2		1.38136e-16	-0.709619
1190	TSPAN15		1.81593e-49	-0.194352	NUP62		4.63974e-44	-0.0378305	CREB5		8.55731e-51	0.0063268	TRUB2		1.22191e-20	-0.491675	TAF4		1.37467e-16	-0.53552	UBAP2L		2.11339e-15	-0.714231	BDH1		1.38445e-16	-0.708038
1191	CD151		1.86813e-49	-0.194198	PPP2R5E		4.90126e-44	-0.0378299	TIMM10	Known disease genes	8.70543e-51	0.00633893	PIK3IP1		1.27928e-20	-0.490599	COPG1		1.37838e-16	-0.535448	BICD2		2.12503e-15	-0.714151	PPP2R5A		1.44935e-16	-0.705915
1192	GADD45G		2.0711e-49	-0.194173	MEGF11		5.05998e-44	-0.0378137	DDX18		9.5308e-51	0.00636189	PRPF40B		1.31357e-20	-0.490284	TOX3		1.38523e-16	-0.534967	ASNS		2.13842e-15	-0.713649	RHOA		1.45488e-16	-0.705644
1193	GOLPH3		2.26668e-49	-0.194077	MRPS25		5.20616e-44	-0.0378017	HSD17B1		1.3505e-50	0.00640204	AGK		1.32801e-20	-0.490204	ANO9		1.46135e-16	-0.534922	STRBP	Known disease genes	2.17801e-15	-0.713058	FAM216B		1.49432e-16	-0.7056
1194	EIF3F		2.27789e-49	-0.193859	ACTR2	Prognostic genes	5.33375e-44	-0.037768	GNB1		1.98437e-50	0.00640249	B4GALT4		1.38385e-20	-0.489073	TTC39C		1.48455e-16	-0.534342	SNX30		2.23302e-15	-0.712222	IDI1		1.53262e-16	-0.705316
1195	MED29		2.34492e-49	-0.193858	SPATC1L		5.90974e-44	-0.0377595	MYH9		2.19238e-50	0.00640451	PTGES2		1.40868e-20	-0.488784	EPB41L5		1.48967e-16	-0.533213	PSMD14		2.23887e-15	-0.711867	PRR3		1.54959e-16	-0.704279
1196	TOX3		2.55065e-49	-0.193349	LARP1		5.94316e-44	-0.0374371	FCGRT		2.55431e-50	0.0064082	PLXNA3	Prognostic genes	1.45316e-20	-0.48846	ID3		1.49077e-16	-0.532777	ATP8A2		2.27282e-15	-0.710169	ST7		1.55933e-16	-0.704205
1197	BTF3L4		3.00594e-49	-0.193205	MSRB2	Prognostic genes	6.20148e-44	-0.0374316	COL6A1		2.56196e-50	0.00640878	NOL6		1.47213e-20	-0.487399	GCSH		1.51329e-16	-0.532429	HINT3		2.34389e-15	-0.709775	CDS2		1.64299e-16	-0.703807
1198	UCHL3		3.02154e-49	-0.193038	NFKBIE		6.42634e-44	-0.0374153	AHDC1		2.91915e-50	0.00641324	RHBDD3		1.47238e-20	-0.487323	CBX1		1.51822e-16	-0.531407	BRCC3		2.4264e-15	-0.709228	TSC22D1		1.65414e-16	-0.703719
1199	BCAT1		3.51692e-49	-0.192804	MPP6		6.54473e-44	-0.0374028	SHISA3		3.14343e-50	0.00642042	CCZ1B		1.52165e-20	-0.487227	LZTFL1		1.53322e-16	-0.531105	FAM220A		2.57348e-15	-0.708236	KIAA1522		1.69081e-16	-0.702281
1200	EFCAB1		3.63183e-49	-0.19209	MTA1		6.62076e-44	-0.0373863	DHRS7		3.44097e-50	0.00642625	GON4L		1.53957e-20	-0.487106	GPRIN2		1.53665e-16	-0.531041	AKIRIN2		2.62626e-15	-0.70791	CTSO		1.79469e-16	-0.702275
1201	TRIM47		4.25073e-49	-0.191731	HGD		6.75655e-44	-0.0373605	PPP2R5E		3.49488e-50	0.00647012	SLC41A2		1.55086e-20	-0.486817	SLC35A2		1.56092e-16	-0.53081	ZNF92		2.67167e-15	-0.70779	PSMD14		1.83262e-16	-0.702006
1202	CYP1B1		4.28651e-49	-0.19156	ANKLE2	Prognostic genes	7.18909e-44	-0.0373004	PCDH9		3.53431e-50	0.00647455	MITF		1.58838e-20	-0.486409	NDE1		1.5783e-16	-0.530468	ORC2		2.68941e-15	-0.706931	HPRT1		1.83352e-16	-0.701987
1203	KLK11		4.88784e-49	-0.19147	TGM2		7.83607e-44	-0.0372708	ZC3H11A		3.63401e-50	0.00649599	ELMO3		1.68203e-20	-0.485883	SEMA4C		1.57887e-16	-0.529721	FLVCR1		2.77143e-15	-0.705959	NDEL1		1.84618e-16	-0.699834
1204	TMCO1		5.04968e-49	-0.191206	LZTS2		8.00233e-44	-0.0372312	COMTD1		3.76357e-50	0.00650273	HECW2		1.71818e-20	-0.48554	FILIP1		1.59812e-16	-0.529304	FAM229B		2.83294e-15	-0.70465	CTSS		1.90549e-16	-0.699576
1205	IL6ST		5.28049e-49	-0.191164	DUOXA1		8.41611e-44	-0.0372298	C1orf53		4.3856e-50	0.00652759	MUC4		1.71978e-20	-0.485246	GNA11		1.64257e-16	-0.529271	NONO		2.83489e-15	-0.704605	ANKRD40		1.94306e-16	-0.699331
1206	SFT2D2		5.34887e-49	-0.191124	LRRC6		1.14104e-43	-0.0371841	TIPRL		4.70298e-50	0.00654652	TUBB6		1.80476e-20	-0.48482	GPATCH4		1.65082e-16	-0.528641	WWP2		2.84003e-15	-0.703087	MRTO4		1.96029e-16	-0.699162
1207	OXLD1		5.43964e-49	-0.191029	HNRNPA3		1.43161e-43	-0.0371465	RHOD		5.53342e-50	0.00656317	THOC3		1.82828e-20	-0.484741	C1orf159		1.66229e-16	-0.527881	SLCO3A1		2.84853e-15	-0.702352	SNX24		2.04519e-16	-0.698905
1208	CMPK1		5.48455e-49	-0.190069	LPGAT1		1.47729e-43	-0.0370926	DSP		7.3258e-50	0.00660271	SETDB1		1.83237e-20	-0.48427	RIN3		1.67567e-16	-0.527396	UBXN4		2.8868e-15	-0.702097	EFCAB1		2.05753e-16	-0.698327
1209	WDR46		6.48582e-49	-0.188937	MEX3D		1.48445e-43	-0.0367706	PTP4A1		7.86631e-50	0.00660578	EMC9		1.85604e-20	-0.483922	ASPHD1		1.68606e-16	-0.526532	ZNF107		2.91297e-15	-0.701999	NDUFAF7		2.0973e-16	-0.696504
1210	SMPDL3B		7.35194e-49	-0.188911	BFAR	Prognostic genes	1.48881e-43	-0.0366301	KNOP1		7.97259e-50	0.00661312	UGGT1		1.89009e-20	-0.483873	CRK		1.68719e-16	-0.525999	TSPAN6	Prognostic genes	2.93939e-15	-0.700383	KRT16		2.13666e-16	-0.695004
1211	PPARD	Prognostic genes	7.43932e-49	-0.188504	CNN2		1.5456e-43	-0.0365204	RNF5		9.1088e-50	0.00661336	SRRT		1.94899e-20	-0.483724	ZYX		1.70823e-16	-0.525876	NLE1		2.95566e-15	-0.699627	TRIOBP		2.16856e-16	-0.694971
1212	TSPAN17		8.05022e-49	-0.188401	PPP1R15B		1.70076e-43	-0.0364031	FABP6		9.48322e-50	0.00662032	TTLL4		2.06256e-20	-0.482534	CDK5RAP3		1.74687e-16	-0.525677	CASP3		3.02755e-15	-0.699488	KDM1A		2.20482e-16	-0.694559
1213	HSP90AB1		8.17978e-49	-0.18819	TRAPPC3		1.86396e-43	-0.036382	SCARB2		1.21212e-49	0.00662088	FBXL3		2.13592e-20	-0.481989	DDX39A		1.78795e-16	-0.525488	CHURC1		3.09296e-15	-0.699314	GLRX3		2.21244e-16	-0.693851
1214	EPHB2		8.73477e-49	-0.187387	TMEM63A		2.04885e-43	-0.0362316	MEX3A		1.35191e-49	0.00663736	MSH6	Known disease genes	2.19978e-20	-0.481789	NEK6		1.78795e-16	-0.525326	FAM114A1		3.14928e-15	-0.699216	DCUN1D5		2.21804e-16	-0.692984
1215	ZNF207		8.89131e-49	-0.187192	NFKB1		2.3599e-43	-0.0361147	STOML2		1.36289e-49	0.0066393	ANKRD36C		2.25842e-20	-0.481719	DDX27		1.86355e-16	-0.525246	TLCD1		3.22643e-15	-0.699041	COA4		2.32893e-16	-0.692745
1216	CENPM		9.08284e-49	-0.187168	F12		2.39811e-43	-0.0360058	SLC16A7		1.47089e-49	0.00664876	POLM		2.38398e-20	-0.481472	PPM1G		1.86355e-16	-0.525051	DTYMK		3.29445e-15	-0.698914	EED		2.35975e-16	-0.691968
1217	SLC39A1		9.77858e-49	-0.186917	LGMN		2.46459e-43	-0.035968	MAPKAPK2		1.52654e-49	0.00667038	TRAF7		2.46068e-20	-0.481289	TPPP		1.8753e-16	-0.5249	ABTB1		3.31863e-15	-0.698813	WDR77		2.41189e-16	-0.691721
1218	ACSL5		9.82075e-49	-0.18652	HGS		2.7918e-43	-0.0359531	TMEM14C		1.62872e-49	0.00667222	HNRNPC		2.46328e-20	-0.481053	PLK3		1.88831e-16	-0.524478	MAGEH1		3.62003e-15	-0.698645	DYNLRB2		2.41973e-16	-0.690896
1219	MRPL4		1.00856e-48	-0.1862	NEDD8		3.33321e-43	-0.035855	NDUFA11		1.71219e-49	0.00667703	NR4A3		2.49277e-20	-0.480055	PCNA		1.89323e-16	-0.524086	B2M		3.62544e-15	-0.698265	EGLN3		2.71841e-16	-0.690834
1220	CIT		1.01238e-48	-0.186178	HNRNPAB		3.34432e-43	-0.035852	RABL2B		2.07159e-49	0.00669986	CCZ1		2.54029e-20	-0.479278	EXOSC5		1.94195e-16	-0.523681	ASAH1		3.69065e-15	-0.697628	C1orf56		2.76971e-16	-0.69077
1221	ECH1		1.03981e-48	-0.185893	ENTPD6		3.48515e-43	-0.0358207	SLC16A11		2.26101e-49	0.00670169	CRTAC1		2.58267e-20	-0.477549	LCOR		1.94867e-16	-0.521993	PNRC1		3.83257e-15	-0.696047	BEX4		2.80558e-16	-0.690727
1222	EGR3		1.22339e-48	-0.185541	SLC25A6		3.50775e-43	-0.0356889	ATP11A		2.51948e-49	0.0067089	FKBP4		2.59438e-20	-0.476858	ANKRD39		1.95084e-16	-0.521125	TCERG1		3.83623e-15	-0.695906	TTLL4		2.81081e-16	-0.690624
1223	IFNAR1		1.3388e-48	-0.18542	FERMT1		3.50982e-43	-0.0356613	LTBP3		2.60266e-49	0.00671901	RPGR		2.64362e-20	-0.476798	PAK6		1.97676e-16	-0.520078	TMEM87B		3.98384e-15	-0.695682	ANKRD39		2.84731e-16	-0.690131
1224	PSMA1		1.36479e-48	-0.18499	MAPK14	Known disease genes	3.54703e-43	-0.035596	CD82		2.91745e-49	0.00671933	ZHX3		2.69446e-20	-0.476495	CCDC43		1.98202e-16	-0.520036	FAM174A	Prognostic genes	3.99488e-15	-0.695565	NDN		2.96004e-16	-0.689134
1225	YBX1		1.3874e-48	-0.184524	PPP1R12B		5.4171e-43	-0.0355945	MIEN1		2.92166e-49	0.00672942	LONRF1		2.77042e-20	-0.475963	MRPL24		2.01144e-16	-0.519727	CCHCR1		3.99616e-15	-0.695281	PUSL1		3.11266e-16	-0.688462
1226	AP2B1		1.48991e-48	-0.184332	PRSS8		5.5564e-43	-0.035575	PAICS		3.04086e-49	0.00673957	FUNDC1		2.89185e-20	-0.475904	TCERG1		2.07238e-16	-0.519321	PJA2		3.99616e-15	-0.695044	CREBRF		3.2082e-16	-0.688329
1227	DNAH5		1.62386e-48	-0.183883	MTAP		6.11498e-43	-0.0355474	CETN2	Prognostic genes	3.12007e-49	0.00674641	EXOSC1		3.02811e-20	-0.474679	LRRK2		2.07684e-16	-0.518875	APIP		4.04999e-15	-0.694794	RAB11FIP2		3.26304e-16	-0.687825
1228	FADD		1.69393e-48	-0.182923	GOLGA7B		6.50132e-43	-0.0355356	LSM12		3.52238e-49	0.00675406	DNAJC18		3.05325e-20	-0.474419	ZDHHC18		2.11073e-16	-0.518489	ICA1		4.0709e-15	-0.694723	ID2		3.32979e-16	-0.687626
1229	RRAS		1.85281e-48	-0.182694	INF2		6.95549e-43	-0.0355045	PTN		3.53821e-49	0.00677265	TMED2		3.09423e-20	-0.473788	ZNF212		2.12837e-16	-0.518025	FOXO3	Known disease genes	4.0709e-15	-0.69328	LIG1		3.3604e-16	-0.687212
1230	TAF7		1.8979e-48	-0.18269	EPHB2		7.31219e-43	-0.0354728	MGST3		3.55614e-49	0.00677372	DHX37		3.15375e-20	-0.471566	STARD4		2.15972e-16	-0.517442	STAMBP		4.11549e-15	-0.692937	FOXRED1		3.42463e-16	-0.686881
1231	TP53	Known disease genes	2.02712e-48	-0.1825	PCP4L1	Prognostic genes	8.05574e-43	-0.0354722	ZFAND3	Prognostic genes	4.03034e-49	0.00677874	DAB2		3.45922e-20	-0.471051	TUBA1A		2.16219e-16	-0.516479	CLASP2		4.2121e-15	-0.692428	ALDH1A1		3.43666e-16	-0.686584
1232	OAS1		2.21792e-48	-0.180263	FBXO32		8.22689e-43	-0.035415	MPLKIP		4.11885e-49	0.00679857	METTL23		3.61038e-20	-0.470845	RP2		2.22118e-16	-0.514302	SCEL		4.21916e-15	-0.691702	SPRY4		3.54247e-16	-0.686272
1233	DDX46		2.27728e-48	-0.180142	PLXNA3	Prognostic genes	8.58659e-43	-0.0352813	MMP7		4.16242e-49	0.00679903	GCLC		3.63712e-20	-0.470442	CRTAP		2.26805e-16	-0.513941	GTPBP2	Prognostic genes	4.23112e-15	-0.691027	FAM114A1		3.647e-16	-0.685915
1234	TNFRSF1A		2.94183e-48	-0.180097	B4GALT5		8.59768e-43	-0.0352556	SORL1		4.23266e-49	0.00681993	GOLGA5		3.65663e-20	-0.469852	CD53		2.36005e-16	-0.513907	SATB1	Known disease genes	4.30562e-15	-0.690919	TMEM87B		3.66299e-16	-0.684861
1235	ODF2L		4.03308e-48	-0.179968	GALNT11		8.95703e-43	-0.0350664	EGLN3		4.46798e-49	0.0068254	TBL2		3.6697e-20	-0.469624	RILP		2.38044e-16	-0.513085	LDLRAD1		4.36738e-15	-0.690747	PIGU		3.66299e-16	-0.684739
1236	KCNK1		4.09589e-48	-0.179703	GFER		1.12705e-42	-0.0349961	UBAP1		4.78924e-49	0.00684037	MRPL12	Known disease genes	3.76489e-20	-0.469352	BTG2		2.3812e-16	-0.513011	MTA3		4.41353e-15	-0.690186	FAM83H		3.80694e-16	-0.684648
1237	BTN3A2		4.22722e-48	-0.179549	RAB15		1.18275e-42	-0.0349012	LRIF1		4.9138e-49	0.00684216	TMEM186		3.83867e-20	-0.469187	MED14		2.38288e-16	-0.512227	RXRA		4.4695e-15	-0.689788	S100A4		3.86452e-16	-0.682242
1238	HMGB3		4.27792e-48	-0.17926	ALDOC		1.19777e-42	-0.0348951	TGM2		5.43492e-49	0.00684797	COA7		3.88638e-20	-0.468119	SLC7A11		2.42072e-16	-0.512055	CSF3R		4.51103e-15	-0.689313	NABP2		3.88272e-16	-0.681621
1239	IL20RA		4.58577e-48	-0.179067	ARHGAP27		1.27802e-42	-0.0348135	RNASEH2C		5.58242e-49	0.00685481	CHML		3.91652e-20	-0.466928	S100P		2.42336e-16	-0.511603	ETS2		4.58191e-15	-0.689283	ZBED4		3.94654e-16	-0.681548
1240	COA3		5.04303e-48	-0.177382	SVIL		1.34224e-42	-0.0347579	LRRC6		7.53343e-49	0.00685557	NIF3L1		3.93915e-20	-0.466419	CREBL2		2.4497e-16	-0.511157	COPG1		4.60061e-15	-0.688236	GTPBP2	Prognostic genes	3.97594e-16	-0.681447
1241	MRPL37		5.43238e-48	-0.176842	C1orf43		1.39122e-42	-0.0346583	TOM1L1		8.51189e-49	0.00686354	CIT		4.14622e-20	-0.465637	BEST1		2.49442e-16	-0.510077	GNA11		4.62647e-15	-0.688226	GSAP		4.25973e-16	-0.681392
1242	CXCL1		5.80964e-48	-0.17676	GALNT14		1.46155e-42	-0.0346409	PLEC		9.03013e-49	0.00686692	PDCD5		4.1607e-20	-0.465364	DCUN1D5		2.55211e-16	-0.510041	RYBP		4.69465e-15	-0.687836	COIL		4.6315e-16	-0.68035
1243	GLMP		6.07331e-48	-0.17581	SHKBP1		1.46213e-42	-0.0346337	UQCR10		1.01608e-48	0.00689174	NTMT1	Prognostic genes	4.35798e-20	-0.465145	HMGCR		2.56458e-16	-0.509905	LTA4H		4.76581e-15	-0.687257	RNF207		4.64539e-16	-0.679871
1244	RBMX		6.25944e-48	-0.175638	GLRX3		1.48287e-42	-0.0346079	CANX	Prognostic genes	1.24624e-48	0.00691225	MOV10		4.42536e-20	-0.464403	ABCC10		2.57987e-16	-0.50983	PER1		4.89452e-15	-0.686188	MRPL15		4.70045e-16	-0.679452
1245	RPLP1		6.83088e-48	-0.175522	EIF4E2	Prognostic genes	1.68219e-42	-0.0343511	ABHD17C		1.38386e-48	0.00691852	TLN1		4.4683e-20	-0.463719	NOP56	Known disease genes	2.7036e-16	-0.50924	PITX1		4.96639e-15	-0.68603	ZMIZ1		4.7042e-16	-0.679445
1246	HLA-DRA		7.96146e-48	-0.174972	GLIPR2		1.70623e-42	-0.0343378	FAM13A		1.52864e-48	0.00692389	DPY19L1		4.65168e-20	-0.463712	BLOC1S4		2.72334e-16	-0.508834	S100A4		4.98859e-15	-0.685927	NIF3L1		4.71087e-16	-0.678564
1247	ITGB6		8.81179e-48	-0.174148	NABP1		1.72098e-42	-0.0343075	MRPL37		1.63789e-48	0.00692527	UBAP2L		4.75606e-20	-0.463021	PHF6		2.75669e-16	-0.508644	WDR45B		5.12819e-15	-0.68577	MAGED1		4.71387e-16	-0.678027
1248	MAPK15		1.00953e-47	-0.173862	CLIC5		1.75897e-42	-0.0342644	GALNT10		2.33353e-48	0.00693949	EIF4EBP1		4.79521e-20	-0.462634	NFXL1		2.80224e-16	-0.507364	VPS45		5.12887e-15	-0.683744	SLX4IP		4.8399e-16	-0.677997
1249	ALG3		1.02962e-47	-0.173209	MANEAL		2.08424e-42	-0.0342616	DCAF7		2.33784e-48	0.00693966	MRPL53		4.80119e-20	-0.462629	RANBP1		2.81819e-16	-0.507306	XPO6		5.263e-15	-0.683251	GINM1		4.87877e-16	-0.677789
1250	PPCS		1.13957e-47	-0.173116	MCM7		2.41645e-42	-0.034202	RPL21		2.77827e-48	0.00694067	PNPT1		4.89768e-20	-0.462002	HPRT1		2.86275e-16	-0.506172	SLC2A3		5.33228e-15	-0.682772	ATP2A2		4.92324e-16	-0.677679
1251	PLTP		1.39612e-47	-0.173091	RAC3		2.45195e-42	-0.0341119	MRPS6		2.99941e-48	0.00694188	LAMB2		4.95591e-20	-0.460944	IGFBP3		3.12508e-16	-0.505202	TRIT1		5.33913e-15	-0.682658	GOLGA7B		5.04642e-16	-0.675762
1252	SMCO4		1.42235e-47	-0.17261	PSMB2		2.63972e-42	-0.0340649	YTHDF2		3.24755e-48	0.00694828	NUP62		5.10459e-20	-0.460671	XPOT		3.15377e-16	-0.50417	PHKG2		5.37756e-15	-0.682497	PLEKHH2		5.18118e-16	-0.675669
1253	ZCCHC17		1.97856e-47	-0.172455	EIF6		2.69256e-42	-0.0339952	SRP72		3.80788e-48	0.00696528	PPP3CC		5.12058e-20	-0.46027	CLTC		3.16104e-16	-0.503233	NQO1		5.39839e-15	-0.682464	RBM12B		5.40867e-16	-0.675126
1254	CYTH3		2.53573e-47	-0.172147	TSC22D4		2.70472e-42	-0.0339584	LSM14A		3.92039e-48	0.00696737	NR2C2AP		5.17285e-20	-0.459093	RAE1		3.20847e-16	-0.503128	SUN2		5.43478e-15	-0.682372	GNG7		5.54079e-16	-0.674674
1255	RBBP4		2.54785e-47	-0.172131	C1orf35		2.81014e-42	-0.0339567	AKT2		4.70691e-48	0.00697405	DDOST	Prognostic genes	5.2388e-20	-0.458664	HES6		3.27173e-16	-0.502593	PPIL1		5.44121e-15	-0.682164	NDE1		5.59828e-16	-0.672662
1256	BOLA3		2.55068e-47	-0.171356	CBX4		2.98414e-42	-0.0339467	MICAL2		4.80454e-48	0.00702058	HMOX1	Prognostic genes	5.28222e-20	-0.458107	DOCK8		3.32096e-16	-0.501763	HLA-DOA		5.50865e-15	-0.680698	TNFAIP1		5.90655e-16	-0.671418
1257	TIPARP		2.71422e-47	-0.170985	MMP15		3.34544e-42	-0.0339404	WSB1		5.0866e-48	0.00705253	EXOSC2		5.37785e-20	-0.45791	YKT6		3.32342e-16	-0.501405	DLG5		5.70879e-15	-0.679241	ABCC10		5.92648e-16	-0.670873
1258	HTATIP2		2.9028e-47	-0.170901	TRIM14		3.51458e-42	-0.0339373	BTF3L4		5.26153e-48	0.00706316	RNF43		5.52992e-20	-0.457898	NUMB		3.37815e-16	-0.50049	CARD8		5.83873e-15	-0.677913	HNRNPC		6.06316e-16	-0.670236
1259	ITGB1BP1		2.94326e-47	-0.169949	GBP2		3.73106e-42	-0.0339302	CTTN		5.28218e-48	0.00706573	SAAL1		5.563e-20	-0.457876	CACYBP		3.54478e-16	-0.500081	FAM222B		5.94079e-15	-0.677869	WDR74		6.09055e-16	-0.670149
1260	MIEN1		3.33454e-47	-0.169517	PMAIP1		3.88657e-42	-0.0338646	GORASP2		6.04494e-48	0.00707603	ZNF687		6.01931e-20	-0.457489	CATSPERD		3.59159e-16	-0.49923	FGF7		6.13255e-15	-0.677634	CHAF1A		6.27894e-16	-0.669878
1261	PURB		3.47624e-47	-0.169335	PKP3		4.09531e-42	-0.0338311	ZDHHC4		6.11946e-48	0.00707769	USP28		6.19942e-20	-0.457265	SCARF1		3.681e-16	-0.499106	DCAF12		6.14851e-15	-0.677118	DNAJC10		6.34245e-16	-0.669653
1262	MIER1		3.82291e-47	-0.168746	SNRNP200		4.35902e-42	-0.0338154	MPZL1		6.88825e-48	0.00708121	ARHGAP30		6.44699e-20	-0.456892	GBP4		3.71265e-16	-0.498409	CYB5A	Prognostic genes	6.41295e-15	-0.675842	CACYBP		6.48077e-16	-0.669377
1263	SPAG9		4.14592e-47	-0.168718	PLEK2		4.40181e-42	-0.033707	MTPN		8.14845e-48	0.0070821	LOXL2	Prognostic genes	6.63043e-20	-0.45655	CACNB3		3.73355e-16	-0.4982	GNL2		6.46044e-15	-0.675348	MACROD2		6.64385e-16	-0.669276
1264	SCNM1		4.59606e-47	-0.168657	B9D1		4.74108e-42	-0.0336687	TSPAN8	Prognostic genes	9.78714e-48	0.00708602	C5orf22		7.08544e-20	-0.45576	WDR45B		4.00752e-16	-0.498162	EHD1		6.601e-15	-0.67453	RIN3		6.66698e-16	-0.669102
1265	PSAP		4.85371e-47	-0.167822	AP2B1		5.59888e-42	-0.0336066	NOL3		1.06356e-47	0.00709181	SEC61G		7.30803e-20	-0.454687	CDKN2A		4.02694e-16	-0.498156	CISD2		7.11261e-15	-0.673988	SEMA4C		6.95363e-16	-0.669077
1266	LMAN2		5.01924e-47	-0.167789	TRAF7		5.62562e-42	-0.0335504	NF1		1.67271e-47	0.00710439	FASTK	Known disease genes	7.58715e-20	-0.454499	FASTKD1		4.1767e-16	-0.497129	MAGI3		7.16643e-15	-0.672855	WWC3		7.01652e-16	-0.668856
1267	CAPNS1		5.43127e-47	-0.16777	TMEM134		5.69096e-42	-0.0334604	DDX42		1.74237e-47	0.00710484	SMIM15		7.61581e-20	-0.454163	ANKRD40		4.1856e-16	-0.49641	MTFR1		7.2085e-15	-0.672558	FAM53B		7.41734e-16	-0.6684
1268	MAPK14	Known disease genes	6.32222e-47	-0.167667	SCARB2		5.93571e-42	-0.0334107	OXA1L		1.94587e-47	0.00711515	PPFIBP1		7.63005e-20	-0.453968	NOC2L		4.18977e-16	-0.495956	NEK6		7.23869e-15	-0.672304	RAPGEF2		7.46064e-16	-0.667509
1269	HOXD1		6.91831e-47	-0.167171	MRPS34		6.10291e-42	-0.033345	COPS6		1.97447e-47	0.00714111	C4orf3		8.17847e-20	-0.453781	SLC6A8		4.22613e-16	-0.495947	ABHD11		7.31442e-15	-0.67196	SETDB1		7.46561e-16	-0.666994
1270	AK4		7.58682e-47	-0.166722	CCDC137		6.40543e-42	-0.0333263	GRAMD1A		1.98769e-47	0.00714378	TSPAN12		8.21498e-20	-0.453023	MEST		4.23259e-16	-0.495944	VPS72		7.31538e-15	-0.671781	GPRC5A		7.53613e-16	-0.666776
1271	ZNHIT3		7.91469e-47	-0.166717	ACP1		7.16671e-42	-0.033317	MAFG		1.99374e-47	0.00715747	MSMO1		8.21623e-20	-0.45263	IDE		4.24121e-16	-0.495854	CACYBP		7.63836e-15	-0.671598	PRKDC	Known disease genes	7.59824e-16	-0.666392
1272	TNFRSF19		7.98335e-47	-0.166665	AP3D1		8.13424e-42	-0.0332662	TUBG1		2.04426e-47	0.00717324	TBC1D9		8.21623e-20	-0.452069	PITPNA		4.45483e-16	-0.495167	GANC		7.68037e-15	-0.671055	CUL7		7.63238e-16	-0.666186
1273	CCDC124		8.22974e-47	-0.166473	MROH6		8.48328e-42	-0.0331578	HSP90B1		2.13712e-47	0.00717397	C4orf48	Prognostic genes	8.36436e-20	-0.451957	XYLT2		4.45573e-16	-0.495065	TMPRSS4		7.68221e-15	-0.670454	MPDZ		7.67457e-16	-0.665607
1274	TAP2		8.54942e-47	-0.166333	AFF3		8.57317e-42	-0.033098	TMCO1		2.16299e-47	0.00721556	GNL2		8.88707e-20	-0.451701	DHFR		4.5185e-16	-0.493371	IDH2		7.68221e-15	-0.670305	BCL2A1		7.87698e-16	-0.665111
1275	DDX24		8.91388e-47	-0.166111	LIMA1		9.02702e-42	-0.0330476	PURB		2.28945e-47	0.00721832	NUP210		8.95559e-20	-0.451378	PPP6C	Prognostic genes	4.59286e-16	-0.492227	SYNE1		7.98815e-15	-0.669147	HEBP1		8.16404e-16	-0.663157
1276	COPS6		1.03276e-46	-0.16601	FGD6		1.03189e-41	-0.0330303	B4GALT2		2.47023e-47	0.00722138	TRAK2		9.46488e-20	-0.451155	CERS6		4.62162e-16	-0.491812	THUMPD2		8.00371e-15	-0.668518	FASTKD1		8.16704e-16	-0.66263
1277	CFAP53		1.06954e-46	-0.165978	BRIX1		1.07188e-41	-0.033017	IQCG		2.92303e-47	0.00723776	MFSD2A		1.07336e-19	-0.450461	RHOA		4.6273e-16	-0.49164	LSR		8.25592e-15	-0.668227	POLE		8.30291e-16	-0.662262
1278	NREP		1.18699e-46	-0.165966	HMGN1		1.32778e-41	-0.0328926	CCND2		3.30344e-47	0.0072422	SEC24A		1.0746e-19	-0.450225	SMIM22		4.62831e-16	-0.491308	UBE2E2		8.40323e-15	-0.666804	NEK6		8.47255e-16	-0.660284
1279	PELI1		1.37454e-46	-0.165251	CBR1		1.35484e-41	-0.0328923	VOPP1		3.6558e-47	0.0072456	IBA57		1.11357e-19	-0.450171	AP1G2		4.63651e-16	-0.49127	EEF2KMT		8.46384e-15	-0.666418	HPS3		8.71179e-16	-0.660178
1280	PRKCA		1.4473e-46	-0.164623	PIP5KL1		1.53194e-41	-0.0328861	MAD2L2		4.55295e-47	0.00724692	CPSF1		1.1161e-19	-0.449988	NOL6		4.70586e-16	-0.490765	DECR2		8.5728e-15	-0.666316	HNRNPAB		8.86298e-16	-0.659306
1281	PSME1		1.52309e-46	-0.163427	CDH1		1.54349e-41	-0.0328772	SRSF9		4.87117e-47	0.00726173	RBBP5		1.16343e-19	-0.449156	ZMIZ1		4.79485e-16	-0.489815	GLRX3		8.72462e-15	-0.665393	ZNF212		8.98432e-16	-0.659013
1282	C1GALT1		1.56115e-46	-0.163379	COPA		1.70244e-41	-0.0328706	BRD4		4.90797e-47	0.00726492	RPUSD1		1.19573e-19	-0.448687	TMOD3		4.84372e-16	-0.489772	ADAM8		9.02378e-15	-0.664918	CD53		9.00818e-16	-0.658553
1283	C1QB		1.6362e-46	-0.163175	MTHFD2		1.72033e-41	-0.0327953	LFNG		4.90988e-47	0.00728063	ST6GALNAC1	Prognostic genes	1.21452e-19	-0.447758	INTS4		4.86119e-16	-0.489568	ZDHHC13		9.10917e-15	-0.664365	HMGCS1		9.04891e-16	-0.658507
1284	DPM2		1.88093e-46	-0.163175	GALNT7		1.7455e-41	-0.0326881	TMED4		5.34738e-47	0.00728182	CREBZF		1.23193e-19	-0.447683	TRAF7		4.92514e-16	-0.489206	ZBTB41		9.2868e-15	-0.664316	GNL2		9.0601e-16	-0.658369
1285	C9orf24		2.06463e-46	-0.162866	SNCG		1.76486e-41	-0.0326593	TIMM8B		5.34835e-47	0.00728842	LYPLA2		1.26362e-19	-0.446925	PSMD14		4.9971e-16	-0.488086	PAXIP1		9.31939e-15	-0.664097	SMPDL3B		9.26261e-16	-0.65825
1286	RFXANK		2.14024e-46	-0.162211	RANBP9		2.00685e-41	-0.0325953	CAPN2		5.37429e-47	0.00729823	RPN2		1.27239e-19	-0.445506	NFATC4		5.19127e-16	-0.487914	CCDC28A		9.33762e-15	-0.663897	HLF		9.29368e-16	-0.658239
1287	SNX18		2.15531e-46	-0.161675	SPAG6		2.03982e-41	-0.0325589	STX2		5.50353e-47	0.00729996	PFDN2		1.30261e-19	-0.445155	PLOD2	Prognostic genes	5.65795e-16	-0.487577	ATXN7L3		9.3494e-15	-0.661615	B2M		9.34992e-16	-0.658212
1288	KDR	Known disease genes	2.16383e-46	-0.161673	ATF3		2.20588e-41	-0.0324995	UBE2H		5.61707e-47	0.00733783	CCDC86		1.31261e-19	-0.444967	LSM12		5.69255e-16	-0.48747	EHD4		9.73065e-15	-0.661249	SLC35A2		9.47459e-16	-0.658146
1289	LIMK1		2.25114e-46	-0.161478	P3H4		2.29552e-41	-0.0324421	NRIP1		7.69279e-47	0.00736882	TOPBP1		1.34427e-19	-0.444457	PNRC1		5.76814e-16	-0.487208	ZYX		1.01887e-14	-0.660216	MZT2A		9.66614e-16	-0.656176
1290	NOB1		2.28253e-46	-0.161169	TNFAIP1		2.32692e-41	-0.0324122	MRPL27		1.05137e-46	0.00737012	SLC35F5		1.41782e-19	-0.444166	KLHL23		5.77488e-16	-0.486809	GCHFR		1.09407e-14	-0.658646	TEKT1		9.84659e-16	-0.655581
1291	KXD1		2.75492e-46	-0.161134	ZC3H11A		2.34052e-41	-0.0323681	CTNNBIP1		1.07457e-46	0.00738489	KCNK5		1.42307e-19	-0.443953	TMEM139		5.82691e-16	-0.486789	TINF2		1.18861e-14	-0.658579	NOTCH1		1.01274e-15	-0.655073
1292	CD46		2.79729e-46	-0.160791	GCNT3		2.66122e-41	-0.0322291	P3H2		1.18175e-46	0.00738857	SNF8		1.43204e-19	-0.443849	HNRNPC		5.86847e-16	-0.486703	RNF146		1.20311e-14	-0.658212	ETS2		1.01297e-15	-0.654589
1293	CYBA		3.97138e-46	-0.160146	POLR3GL		2.72215e-41	-0.032191	SLC35B1		1.1832e-46	0.0073967	SLC16A3		1.44818e-19	-0.443415	REEP6		5.98952e-16	-0.485805	GORASP1		1.21098e-14	-0.657721	AIFM1		1.02569e-15	-0.654167
1294	FBLIM1		4.06834e-46	-0.159742	HIP1		2.895e-41	-0.0321406	SPRR1B		1.26533e-46	0.00740148	FOXK2		1.45267e-19	-0.443316	DEPTOR		6.11805e-16	-0.485514	KDSR		1.21574e-14	-0.657239	UST		1.03252e-15	-0.654162
1295	RAP2B	Prognostic genes	4.19583e-46	-0.158532	CSNK1E	Known disease genes	3.03767e-41	-0.0320912	TSPAN9		1.59184e-46	0.00740646	WWTR1		1.45937e-19	-0.442266	CLDN4		6.15204e-16	-0.485286	OSTC		1.30013e-14	-0.656928	PDIA6		1.03402e-15	-0.654094
1296	DYNC2H1		4.24097e-46	-0.158332	STEAP3		3.155e-41	-0.03188	TOMM40	Known disease genes	1.64988e-46	0.00741073	SLBP	Prognostic genes	1.50551e-19	-0.442224	MRPL30		6.19234e-16	-0.484605	CDK5RAP3		1.31653e-14	-0.656793	SRD5A3	Prognostic genes	1.04224e-15	-0.653668
1297	PSENEN		4.48551e-46	-0.157488	SFXN1	Known disease genes	3.37161e-41	-0.0317641	LARP1		1.69154e-46	0.0074123	NT5E		1.52178e-19	-0.441248	MCM3		6.19525e-16	-0.483845	MSN		1.3204e-14	-0.65649	NCAPD3		1.05055e-15	-0.653076
1298	RHOF		4.58615e-46	-0.157239	RGS16		3.75657e-41	-0.0316783	UBE2R2		1.72256e-46	0.00741345	FKBPL		1.53592e-19	-0.441139	NUP62		6.45853e-16	-0.483596	TTC9C		1.35998e-14	-0.656366	TLE4		1.06392e-15	-0.652964
1299	NPHP1		4.88761e-46	-0.156979	TMEM132A		3.98845e-41	-0.0315523	STX11		1.78457e-46	0.00741811	HS3ST1		1.54097e-19	-0.440651	COA1		6.49743e-16	-0.483041	LPAR2		1.36162e-14	-0.656022	ASAH1		1.07465e-15	-0.652492
1300	PSMC3		5.0506e-46	-0.155588	TMEM223		4.11753e-41	-0.0315485	SSU72		2.12429e-46	0.00742168	GNG11	Known disease genes	1.59965e-19	-0.440542	SCGB1A1		6.56382e-16	-0.482937	MEIS2		1.37682e-14	-0.655327	RRP1		1.11554e-15	-0.652201
1301	NADK		5.69738e-46	-0.155403	RIC3		4.23065e-41	-0.0315197	SLC5A3		2.5443e-46	0.00742355	NOP16		1.60007e-19	-0.440501	RSPH9		6.58556e-16	-0.481763	CUL7		1.37915e-14	-0.655123	PGAM5		1.12056e-15	-0.651331
1302	DNAAF3		6.39461e-46	-0.155192	NEK8		4.6964e-41	-0.0314889	MYL6B		2.9731e-46	0.00743268	RBMS3		1.60247e-19	-0.440223	EMP3		6.82138e-16	-0.481753	MCM7		1.38246e-14	-0.654773	SRPX2		1.1317e-15	-0.651168
1303	EIF5B		6.91116e-46	-0.154861	CBLB		4.81795e-41	-0.0314744	KXD1		2.97426e-46	0.00744783	ID4		1.60319e-19	-0.44	UBAP2L		6.94446e-16	-0.481002	LSM8		1.38925e-14	-0.65389	UCHL5		1.15224e-15	-0.649526
1304	MRPL15		7.50888e-46	-0.154783	MAP1LC3A		5.11395e-41	-0.0314541	PPP1R12B		3.03691e-46	0.0074491	STYXL1		1.62219e-19	-0.439817	ZFYVE19		7.18477e-16	-0.480822	SLC37A4		1.39213e-14	-0.653836	CYB5A	Prognostic genes	1.16302e-15	-0.648902
1305	PSMC1		8.03281e-46	-0.154411	EIF3J		5.3999e-41	-0.0313648	EGFL7		3.33028e-46	0.00745366	SUSD6		1.72468e-19	-0.439753	APOC1		7.20517e-16	-0.480636	ACSL1		1.42226e-14	-0.653317	ACSL4	Known disease genes	1.19391e-15	-0.64882
1306	IFITM10		8.52809e-46	-0.154232	RABL6		5.64468e-41	-0.0313129	PKP3		3.40621e-46	0.00745877	UQCC3		1.74302e-19	-0.439266	FAM189B		7.28922e-16	-0.479984	MSH2		1.42672e-14	-0.65306	CDH3	Prognostic genes	1.20608e-15	-0.648181
1307	SLC39A7		8.87658e-46	-0.154202	SPRED2		6.0346e-41	-0.0311918	ZNF146		3.46405e-46	0.0074614	RAB25		1.74884e-19	-0.439244	ALDH1B1		7.45041e-16	-0.479694	PDCD6IP		1.43357e-14	-0.652533	DTX2		1.23306e-15	-0.64702
1308	LSM12		9.27392e-46	-0.154026	LRTOMT	Prognostic genes	6.31733e-41	-0.0311313	SNRNP200		3.61515e-46	0.0074687	FGFR2	Known disease genes	1.7592e-19	-0.438947	AGK		7.58148e-16	-0.479251	PSME4		1.46964e-14	-0.651286	MMP28		1.2613e-15	-0.646686
1309	PFDN5		9.38946e-46	-0.15395	SUSD2		6.36346e-41	-0.0311042	FAM20C		3.82749e-46	0.00746901	TPPP3		1.79221e-19	-0.438208	WWC3		7.97441e-16	-0.478846	UGGT1		1.48726e-14	-0.650214	COA6		1.28987e-15	-0.646332
1310	BMP1		1.01114e-45	-0.153943	PCDH7		6.55299e-41	-0.0310231	SGK1		3.83183e-46	0.00748456	CCDC173		1.82229e-19	-0.438052	JUN		8.20758e-16	-0.478519	DNAH12		1.50174e-14	-0.649842	TTC39C		1.34024e-15	-0.646036
1311	RHOB		1.19793e-45	-0.15384	EEF2		6.67191e-41	-0.0307605	FAM234A		4.10118e-46	0.00749458	SPINT2		1.86052e-19	-0.436922	EHD4		8.27714e-16	-0.478397	DUSP12		1.51229e-14	-0.649805	LYZ		1.34836e-15	-0.645485
1312	PRAF2		1.28511e-45	-0.153662	ZNF117		7.07159e-41	-0.03067	SF1		4.17257e-46	0.0074946	SDF2L1		1.91614e-19	-0.436713	RNF11		8.27934e-16	-0.478021	CCDC167		1.55408e-14	-0.649795	AP1G2		1.38008e-15	-0.64522
1313	ICA1		1.75299e-45	-0.153243	CCNG2		7.17018e-41	-0.0306302	TNFAIP2		4.77893e-46	0.0074963	RSPRY1		1.92973e-19	-0.436324	CLIC4		8.3581e-16	-0.477779	RECQL5		1.58137e-14	-0.649757	CD2AP		1.38049e-15	-0.644952
1314	LUZP1		1.80488e-45	-0.153112	TOX3		7.3626e-41	-0.0305504	YPEL3		4.82976e-46	0.00749676	HPCAL1		1.96452e-19	-0.435408	DBN1		8.42576e-16	-0.476544	MICALL2		1.60091e-14	-0.649589	SSR4	Prognostic genes	1.38281e-15	-0.644351
1315	AKT2		1.83127e-45	-0.152572	FKBP3		7.53881e-41	-0.0304266	MT-ND4		5.62092e-46	0.00750852	GPC3		2.1345e-19	-0.435237	ZDHHC3		8.4763e-16	-0.476446	PTTG1		1.60324e-14	-0.649418	MTMR6		1.43445e-15	-0.643105
1316	B4GALT3		1.87e-45	-0.152531	MPZL1		8.81083e-41	-0.0302662	ITGB1BP1		5.76644e-46	0.00751792	WDR3		2.15963e-19	-0.433234	SRRT		8.5112e-16	-0.476162	APC	Known disease genes	1.65936e-14	-0.649319	RAE1		1.43868e-15	-0.642448
1317	MAP1S		1.9827e-45	-0.152369	KRTCAP2		8.87699e-41	-0.0302623	TMEM98		6.4079e-46	0.00752994	NFIX		2.22056e-19	-0.433187	TRAF2		8.63918e-16	-0.476039	ADCK5		1.67537e-14	-0.648043	BTN3A3		1.51671e-15	-0.6421
1318	WFS1		2.04779e-45	-0.152154	ARHGDIA		8.98171e-41	-0.0301991	ATF3		6.82005e-46	0.00754216	EID1		2.27094e-19	-0.433134	IDH2		8.75286e-16	-0.475535	TEX2		1.74891e-14	-0.645939	SLC39A7		1.56836e-15	-0.64088
1319	PTPRE		2.11324e-45	-0.152033	WDR33		9.77464e-41	-0.03017	VAMP8		7.41567e-46	0.00755304	PRR7		2.34016e-19	-0.431848	CASZ1		8.94987e-16	-0.474577	ALG6		1.7576e-14	-0.645637	MRPL30		1.61381e-15	-0.640625
1320	CD320		2.17341e-45	-0.151417	FRMD8		1.02325e-40	-0.0301415	DTX2		8.30424e-46	0.00755414	FAAP100		2.40736e-19	-0.431519	UBXN4		8.97595e-16	-0.474315	TSPAN4		1.7576e-14	-0.645232	IER5L		1.61869e-15	-0.639819
1321	RASEF		2.35595e-45	-0.151395	PTTG1IP	Prognostic genes	1.03583e-40	-0.0300366	C1orf35		1.03015e-45	0.00756019	TRMT5	Prognostic genes	2.40987e-19	-0.431451	TTLL4		9.46046e-16	-0.473968	ITPK1	Prognostic genes	1.81557e-14	-0.643967	MAPK10		1.64319e-15	-0.639801
1322	DNTTIP1	Prognostic genes	2.70451e-45	-0.151037	YTHDF1		1.11229e-40	-0.0299641	DLGAP4		1.13162e-45	0.00756041	PMAIP1		2.51143e-19	-0.431258	DNTTIP1	Prognostic genes	9.49879e-16	-0.473896	FAM76A		1.8388e-14	-0.642429	EXOSC1		1.67634e-15	-0.638922
1323	FILIP1		2.8104e-45	-0.150687	CKAP4		1.14909e-40	-0.0299046	DCBLD2		1.17501e-45	0.00757309	PDGFRL		2.67101e-19	-0.430459	SETDB1		9.62059e-16	-0.473479	DHRS13		1.87747e-14	-0.642331	PER1		1.71159e-15	-0.638547
1324	MRPL57		2.96091e-45	-0.150421	MFGE8		1.29419e-40	-0.029851	YIPF2		1.22062e-45	0.00757584	SHC1		2.76277e-19	-0.430268	TWF1		9.80121e-16	-0.472964	PDIK1L		1.89622e-14	-0.64212	ZYX		1.74279e-15	-0.637829
1325	SCPEP1		3.08412e-45	-0.149693	HES4		1.42712e-40	-0.029836	SRRM1		1.36107e-45	0.00757869	TMEM138		2.83201e-19	-0.430205	METTL23		9.91622e-16	-0.472928	ANXA6		1.93208e-14	-0.642072	SUN2		1.75564e-15	-0.637473
1326	FUT8		3.29028e-45	-0.148523	TUFT1		1.43235e-40	-0.0297363	CISD1		1.39801e-45	0.00758307	EPHB3		2.85598e-19	-0.430189	MUC20		9.9932e-16	-0.472524	ATXN1L		1.9598e-14	-0.641289	RFC5		1.76141e-15	-0.63688
1327	CSDE1		3.53389e-45	-0.147693	HDGF		1.503e-40	-0.0296816	PSMD4		1.49942e-45	0.00758652	NOMO1		2.91272e-19	-0.428904	TRUB2		1.0773e-15	-0.471427	IFT57		2.0218e-14	-0.641001	NPEPPS		1.79785e-15	-0.636834
1328	SFTA2		3.87004e-45	-0.147643	PKN1		1.5239e-40	-0.0296385	GOLPH3		1.61976e-45	0.00762327	LRPPRC		2.9527e-19	-0.428784	BET1		1.09156e-15	-0.471212	ARAP1		2.03698e-14	-0.640462	GON4L		1.84259e-15	-0.636372
1329	SH3BGRL		3.97327e-45	-0.147568	MAP1S		1.6581e-40	-0.0296236	ZNF706		1.74725e-45	0.00763662	EHMT2		3.01221e-19	-0.428531	ARFGAP1		1.12487e-15	-0.471175	ADGRG1		2.04527e-14	-0.640125	XPO4		1.88187e-15	-0.635217
1330	DNM2		4.22453e-45	-0.147513	SRP72		1.7822e-40	-0.0296201	IQCD		1.75442e-45	0.00764134	MRPL37		3.04339e-19	-0.428257	KRTCAP3		1.13018e-15	-0.471167	DAAM2		2.06126e-14	-0.639698	LTA4H		1.88187e-15	-0.63517
1331	CWC15		4.39325e-45	-0.147058	BCL10	Prognostic genes	1.85783e-40	-0.0296172	RBBP4		2.01536e-45	0.00766281	PRRC1		3.06494e-19	-0.427895	DHX37		1.13218e-15	-0.471114	PREB		2.06232e-14	-0.639314	TBC1D7		1.98055e-15	-0.635079
1332	BAMBI		4.41897e-45	-0.146289	FEZ2		1.87326e-40	-0.0296063	PSMC2		2.47558e-45	0.00766542	MAP3K8		3.16941e-19	-0.426619	TAF2		1.13637e-15	-0.470923	MED14		2.1202e-14	-0.639046	SGMS2		1.99119e-15	-0.634179
1333	MFGE8		4.46004e-45	-0.146251	SAP30BP		2.07604e-40	-0.0295237	SDF2L1		2.61684e-45	0.00767145	GALE		3.35104e-19	-0.426243	POLB		1.14183e-15	-0.47038	CCDC137		2.13514e-14	-0.63808	EGR3		2.01989e-15	-0.634075
1334	MCM7		4.84776e-45	-0.145407	TMEM50A	Prognostic genes	2.20804e-40	-0.0293953	OPN3		2.6522e-45	0.00768684	RCN1		3.37368e-19	-0.425676	BNIP3		1.15851e-15	-0.470194	SASS6		2.19068e-14	-0.637613	PREB		2.03533e-15	-0.633748
1335	DENR		5.10722e-45	-0.145221	AKT2		2.42651e-40	-0.0293615	RASEF		2.65728e-45	0.00769069	CHMP4C		3.44051e-19	-0.425637	UGGT1		1.17044e-15	-0.469268	RANBP10		2.1909e-14	-0.636246	ATXN7L3		2.08762e-15	-0.633736
1336	ZNF146		5.12375e-45	-0.145199	MT-CO3		2.58459e-40	-0.0293493	SFT2D2		2.91182e-45	0.00770187	KDF1		3.48624e-19	-0.425482	CPD		1.19872e-15	-0.469148	TGFB1I1		2.20824e-14	-0.636007	CCZ1B		2.10157e-15	-0.633659
1337	BATF		5.30944e-45	-0.14467	ACTN1		2.62958e-40	-0.0293396	ZDHHC12		2.91972e-45	0.00770454	MITD1		3.51977e-19	-0.425441	GOLGA5		1.21595e-15	-0.469067	GPRC5A		2.23369e-14	-0.635883	NFXL1		2.14407e-15	-0.633289
1338	RUVBL2		5.45618e-45	-0.144509	HAUS4		2.74663e-40	-0.029316	CFAP45		3.38967e-45	0.00771237	MRPL17		3.64278e-19	-0.425428	DUSP18		1.24308e-15	-0.468645	PNRC2		2.2854e-14	-0.635226	PLBD1		2.19009e-15	-0.632974
1339	ECT2		6.45915e-45	-0.143776	CFAP45		2.77376e-40	-0.0293126	OGFRL1		3.43443e-45	0.00771587	CPB2		3.73913e-19	-0.424467	RBBP5		1.29968e-15	-0.467445	MTMR9		2.30772e-14	-0.634812	DCAF12		2.29306e-15	-0.632784
1340	ARF3		6.95145e-45	-0.143601	TTC21A		2.87706e-40	-0.0292681	PTPRN2		3.77725e-45	0.00772568	SECISBP2L		3.76077e-19	-0.424365	CISD2		1.32163e-15	-0.466552	KCTD13		2.39735e-14	-0.634784	BIK		2.39794e-15	-0.632007
1341	RGS1		7.16857e-45	-0.143167	DTYMK		3.19953e-40	-0.0291619	PDE9A		4.46082e-45	0.00773524	PIK3R1		3.85552e-19	-0.424317	NIF3L1		1.33342e-15	-0.465359	COL4A4		2.41033e-14	-0.634674	C22orf39		2.40939e-15	-0.63172
1342	TMEM14B		7.79105e-45	-0.142539	SPINK5		3.30818e-40	-0.0290266	DBN1		5.13859e-45	0.00774395	UNG		3.88664e-19	-0.423664	SPRY4		1.36425e-15	-0.465109	LRPPRC		2.50142e-14	-0.634672	SRM	Known disease genes	2.41364e-15	-0.631468
1343	SLC2A4RG		9.25854e-45	-0.142161	ST3GAL1		3.49201e-40	-0.029018	EIF3G		5.77341e-45	0.00774938	SGMS2		3.89767e-19	-0.422662	TLCD2		1.39385e-15	-0.464514	ALPL		2.5353e-14	-0.634311	SETD6		2.47293e-15	-0.630421
1344	VDAC2		9.48492e-45	-0.141961	UQCC3		3.95184e-40	-0.0289651	SRP14	Prognostic genes	5.8588e-45	0.00776157	MPHOSPH10		3.90766e-19	-0.422245	GLRX3		1.39844e-15	-0.46424	DNAJC2		2.61195e-14	-0.633785	CCDC43		2.53002e-15	-0.630278
1345	ZNF277		9.93512e-45	-0.141274	WEE1		3.97328e-40	-0.0289091	RNF187		5.98507e-45	0.00777522	GTPBP4		3.99272e-19	-0.42163	TRIM2		1.42747e-15	-0.463988	NDC1		2.63839e-14	-0.633673	C20orf85		2.55457e-15	-0.629851
1346	NINJ1		1.03233e-44	-0.141271	CHST3		4.13276e-40	-0.0289078	GRB10		6.17625e-45	0.00777676	CTU2		4.04262e-19	-0.421495	PKM	Prognostic genes	1.43218e-15	-0.463251	RSPH9		2.68774e-14	-0.633634	SLC35A1		2.57989e-15	-0.629562
1347	NRP1		1.1863e-44	-0.140715	BABAM1		4.41274e-40	-0.0288478	AP3D1		6.39147e-45	0.00777926	OAZ3		4.19337e-19	-0.421088	GABARAPL1		1.4419e-15	-0.463023	NR3C2		2.68774e-14	-0.633402	PNRC1		2.60753e-15	-0.629309
1348	NACC1		1.3264e-44	-0.140503	TAF1D		4.65277e-40	-0.0288428	CKAP4		8.49654e-45	0.00779891	NUDT1		4.26021e-19	-0.420994	GON4L		1.44266e-15	-0.462656	FAXDC2		2.72624e-14	-0.633049	GTPBP3		2.63067e-15	-0.629252
1349	CAMLG		1.35178e-44	-0.140261	NRIP1		4.65633e-40	-0.0287576	DHFR		1.03976e-44	0.00780132	UNC119		4.35927e-19	-0.420788	MAPRE2		1.52031e-15	-0.460585	AP1S1		2.75619e-14	-0.63282	PLAC8		2.63619e-15	-0.628543
1350	MMP28		1.38232e-44	-0.139895	RCAN2		5.10711e-40	-0.0287561	TMEM132A		1.1781e-44	0.00780749	TACO1		4.36298e-19	-0.420558	ZNF480		1.54907e-15	-0.460398	SEMA4C		2.78181e-14	-0.631459	WWP2		2.63701e-15	-0.628399
1351	ERV3-1		1.38787e-44	-0.139873	DDIT4		5.44961e-40	-0.0287512	TSPAN15		1.254e-44	0.0078152	ARRDC4		4.36422e-19	-0.420498	PARVB		1.54907e-15	-0.46028	RSPH1	Prognostic genes	2.83605e-14	-0.631453	POLB		2.65039e-15	-0.628133
1352	BCL2L15		1.48347e-44	-0.139211	CFL1	Prognostic genes	6.38265e-40	-0.0287407	SLC43A3		1.31105e-44	0.00781984	PDIA3	Prognostic genes	4.37247e-19	-0.419997	MSH6	Known disease genes	1.56432e-15	-0.460236	XPOT		2.87564e-14	-0.63047	INTS4		2.69369e-15	-0.627987
1353	LPGAT1		1.51928e-44	-0.138286	RIT1		7.73498e-40	-0.0286181	STS		1.31437e-44	0.00782572	GUF1		4.38314e-19	-0.418067	PCDH9		1.56432e-15	-0.460007	SSBP2		2.88399e-14	-0.629743	RSPH4A		2.69386e-15	-0.627575
1354	SLC1A5		1.54234e-44	-0.138223	TUBA1A		7.81813e-40	-0.0285951	PIGS		1.36814e-44	0.00783237	ALKBH6		4.46342e-19	-0.417641	TSPAN9		1.57534e-15	-0.459958	GON4L		2.90243e-14	-0.629442	DHFR		2.69957e-15	-0.626823
1355	MPLKIP		1.55503e-44	-0.137959	PLA2G10		8.19817e-40	-0.0285699	TNFRSF18		1.42361e-44	0.0078375	PRPF19		4.49703e-19	-0.417308	WBP4		1.58135e-15	-0.459719	KRTCAP2		2.93438e-14	-0.629401	TUBA4B		2.78512e-15	-0.626794
1356	C1QA		1.68025e-44	-0.137529	CD320		8.36619e-40	-0.0285476	NACC1		1.42847e-44	0.00783923	NCAPD2		4.76497e-19	-0.41666	CXCL3		1.59013e-15	-0.459367	C9orf72		2.94128e-14	-0.628538	PJA2		2.80137e-15	-0.626784
1357	GPATCH4		1.71948e-44	-0.137306	ITGB1BP1		8.69142e-40	-0.028526	MSRB2	Prognostic genes	1.49756e-44	0.00785456	MRPS10		4.79025e-19	-0.416311	ZNF687		1.63331e-15	-0.45905	NFE2L2		2.98402e-14	-0.627791	MED14		2.80287e-15	-0.62649
1358	MRPL11		1.73599e-44	-0.137042	KAT8		9.27576e-40	-0.02847	LLGL2		1.49823e-44	0.00785765	GPSM2		4.86912e-19	-0.416206	GRHL2		1.73092e-15	-0.45872	CEACAM1		2.99665e-14	-0.627418	TSEN54		2.88002e-15	-0.626488
1359	VKORC1L1		1.7439e-44	-0.136964	FADD		9.57656e-40	-0.0284617	GLIPR2		1.67951e-44	0.00786914	PSMC4		5.0992e-19	-0.415842	LRIF1		1.74898e-15	-0.458605	TRMU		3.01803e-14	-0.6272	XPA		2.93495e-15	-0.625891
1360	B4GALT2		1.75358e-44	-0.136906	HOPX		9.58976e-40	-0.0284312	MRPL11		1.70583e-44	0.0078712	RINT1		5.0992e-19	-0.414425	COA7		1.75211e-15	-0.457773	PRKCZ		3.01805e-14	-0.626974	MORN5		3.01017e-15	-0.624543
1361	DDX60		2.0557e-44	-0.136333	DBN1		9.93848e-40	-0.0284252	C17orf97		1.78668e-44	0.00788809	STAP2		5.12732e-19	-0.414031	FAM53B		1.75467e-15	-0.457426	CHPT1		3.03061e-14	-0.626617	FOS		3.05236e-15	-0.624114
1362	WASF2		2.43386e-44	-0.134996	SPRED1		1.05737e-39	-0.0284097	MUC4		1.90546e-44	0.00790684	TOP1MT		5.20943e-19	-0.414031	PTGES2		1.7941e-15	-0.456941	SETDB1		3.10248e-14	-0.626571	DUSP18		3.0641e-15	-0.623957
1363	LAMTOR5		2.73085e-44	-0.134525	RELB		1.06834e-39	-0.0284031	TAF12		1.90984e-44	0.00790736	ERAL1		5.31165e-19	-0.413839	POLM		1.79845e-15	-0.456382	DDX27		3.15274e-14	-0.626487	GPATCH4		3.23977e-15	-0.623269
1364	PLA2G1B		2.91498e-44	-0.13396	RNF24		1.11722e-39	-0.0283491	TMEM176A		1.95183e-44	0.00791152	SLC5A3		5.42102e-19	-0.413546	TBL2		1.82742e-15	-0.456328	SKI		3.15947e-14	-0.626235	COA7		3.26427e-15	-0.623267
1365	EIF3G		3.0589e-44	-0.133095	ZC3H15		1.11824e-39	-0.0282961	RAB38		2.08586e-44	0.00791508	DPY30		5.45044e-19	-0.413318	ITM2C		1.83047e-15	-0.455948	ARID4A		3.15947e-14	-0.626184	TRPT1		3.31831e-15	-0.622397
1366	TTC3		3.72775e-44	-0.131961	CERS6		1.21394e-39	-0.0282695	IL6ST		2.45003e-44	0.00792269	TLK1		5.52766e-19	-0.413021	TMEM186		1.87726e-15	-0.455574	HMBS		3.17714e-14	-0.625501	SRCIN1		3.36895e-15	-0.621335
1367	NEURL1B		4.08295e-44	-0.131424	CAMTA1		1.21542e-39	-0.0282617	UBXN4		2.5393e-44	0.00793617	TBC1D4		5.78061e-19	-0.412752	CHRNB1		1.90124e-15	-0.454832	MTHFD1L		3.24546e-14	-0.625318	SYNE1		3.39851e-15	-0.620884
1368	ZDHHC4		4.25899e-44	-0.131316	HELZ2		1.2265e-39	-0.0282581	DDX24		2.60769e-44	0.00794084	TMEM164		5.80507e-19	-0.412548	GNL2		1.964e-15	-0.454003	ATAD3B		3.39571e-14	-0.624901	RXRA		3.41458e-15	-0.620645
1369	YIPF3		5.55983e-44	-0.130944	ICAM2		1.36359e-39	-0.0282299	RNPS1		2.79222e-44	0.00794565	EGR3		5.90573e-19	-0.411899	TBC1D7		1.98205e-15	-0.45358	COBLL1		3.44045e-14	-0.624852	COA1		3.45294e-15	-0.62063
1370	PFKP		5.80267e-44	-0.129724	RBBP4		1.42697e-39	-0.0281195	SLC2A3		2.82944e-44	0.00794758	TMED4		6.0569e-19	-0.41187	IL37		2.00508e-15	-0.453352	FTO		3.48814e-14	-0.624805	HINT3		3.47168e-15	-0.620524
1371	SKA2		6.18194e-44	-0.129613	KXD1		1.50781e-39	-0.0281024	GOLGA2		2.93808e-44	0.00794977	C6orf141		6.43422e-19	-0.411358	PSMB4		2.02158e-15	-0.452936	FER		3.52513e-14	-0.624363	RASSF1		3.66206e-15	-0.620289
1372	MSMO1		7.05313e-44	-0.129351	RABIF		1.75503e-39	-0.0280937	ZNF581		2.94034e-44	0.00797285	YTHDF1		6.55124e-19	-0.411167	MOV10		2.04904e-15	-0.452932	AMOTL2		3.62465e-14	-0.624273	STIP1		3.70077e-15	-0.619895
1373	FERMT1		7.61955e-44	-0.128542	PDLIM7		1.88583e-39	-0.0280928	FAM222B		3.31205e-44	0.00798601	TPST2		6.62159e-19	-0.41078	EXOSC2		2.05471e-15	-0.452746	ATP10A		3.73465e-14	-0.623937	XPO6		3.70572e-15	-0.619826
1374	GALE		7.77067e-44	-0.127812	PLIN3		2.03221e-39	-0.028081	LTBP1		3.40214e-44	0.00798792	TMEM263		6.72147e-19	-0.410331	EXOSC1		2.07514e-15	-0.452475	ENTPD6		3.79718e-14	-0.623803	PRR36		3.87024e-15	-0.619748
1375	EML4	Known disease genes	8.66391e-44	-0.12779	EXOC7		2.04095e-39	-0.0280726	RBMX		3.51456e-44	0.00799633	METTL2A		6.75055e-19	-0.409783	DDOST	Prognostic genes	2.1185e-15	-0.45241	PLPP5		3.86533e-14	-0.623538	MSN		3.87517e-15	-0.618848
1376	WSB1		9.54911e-44	-0.127397	GALE		2.13819e-39	-0.0280536	CCDC30		4.38514e-44	0.00799797	ATF3		7.09661e-19	-0.409565	FOXK2		2.12055e-15	-0.452394	PUS7L		3.89088e-14	-0.622618	SNX30		3.94429e-15	-0.617388
1377	STX10		9.58257e-44	-0.127272	OPN3		2.1423e-39	-0.0279694	SYT12		4.46975e-44	0.00800774	TUBA1C	Prognostic genes	7.16103e-19	-0.40949	MPHOSPH9		2.12659e-15	-0.451767	IRX2		3.90902e-14	-0.621405	TMEM243		4.23994e-15	-0.617349
1378	MANF		1.20267e-43	-0.127046	CLNS1A		2.39205e-39	-0.0279694	INSIG1		4.57678e-44	0.00803012	EHD2		7.27515e-19	-0.409381	SKI		2.13944e-15	-0.45146	TUBG1		4.02635e-14	-0.621282	PFDN6		4.23994e-15	-0.617274
1379	VOPP1		1.20346e-43	-0.126451	RPS6KA3		2.4274e-39	-0.027918	ANKRD29		4.58109e-44	0.00803682	SPICE1		7.29191e-19	-0.408738	BCL2A1		2.14351e-15	-0.450849	PDZD11		4.23699e-14	-0.62066	MCM7		4.25174e-15	-0.616524
1380	NAMPT		1.21146e-43	-0.1262	AQP1		2.47752e-39	-0.0279092	PDLIM3		4.62416e-44	0.00807667	ITGB4		7.36959e-19	-0.40855	RGS14		2.1453e-15	-0.45055	ADIPOR2		4.29711e-14	-0.617506	MYO9A		4.2618e-15	-0.615678
1381	UBE2R2		1.21903e-43	-0.126027	UBE2L6		3.02747e-39	-0.0278383	STMN3		4.78898e-44	0.00808708	NPNT		7.37515e-19	-0.408148	CCND2		2.16009e-15	-0.450469	SRGAP2B		4.3965e-14	-0.617239	EHD1		4.42354e-15	-0.614831
1382	SIL1		1.28326e-43	-0.125656	NKIRAS2		3.12915e-39	-0.0277296	TAF9		5.15295e-44	0.00808838	PODXL		7.44321e-19	-0.408101	OSBPL6		2.24727e-15	-0.450395	RABEP1		4.40816e-14	-0.617113	HCST		4.6668e-15	-0.614639
1383	OCLN		1.37241e-43	-0.12464	ERAP2		3.4925e-39	-0.0276927	DCUN1D5		7.50097e-44	0.00809197	IFNGR1		7.7952e-19	-0.407857	RBM12B		2.2539e-15	-0.450351	KLF11		4.42689e-14	-0.616491	GNA11		4.70231e-15	-0.613378
1384	PHLDB2		1.39321e-43	-0.124339	MMP14		3.50173e-39	-0.0276445	SNRNP25		7.78513e-44	0.00809417	TNNI3		7.83205e-19	-0.407599	MRPL53		2.34111e-15	-0.450288	RPAP3		4.54296e-14	-0.615676	OSTC		4.78239e-15	-0.613375
1385	VDAC1		1.45404e-43	-0.12426	TPM4		3.57401e-39	-0.0276326	LPGAT1		8.52796e-44	0.00809503	STEAP2		7.91728e-19	-0.407339	PLEKHA6		2.36965e-15	-0.450255	PIGM		4.58581e-14	-0.615366	METTL23		4.79206e-15	-0.613167
1386	MNS1		1.49567e-43	-0.12313	PUM1		3.65476e-39	-0.0276256	GALNT14		1.03875e-43	0.00809603	PTS		7.92912e-19	-0.407066	CCZ1		2.37584e-15	-0.448337	CBX1		4.75147e-14	-0.615193	SLCO4C1		4.81004e-15	-0.612946
1387	LTBP1		1.60169e-43	-0.123015	KRTCAP3		3.74262e-39	-0.027592	UBE2L6		1.20635e-43	0.00811092	B4GALT7		7.97718e-19	-0.40683	AGR2		2.38262e-15	-0.448181	YTHDF1		4.75157e-14	-0.615147	UAP1		4.85084e-15	-0.612566
1388	EIF3J		1.6504e-43	-0.121625	DDX52		3.76479e-39	-0.0275821	CD46		1.23721e-43	0.00811399	HECA		8.37482e-19	-0.405666	LAGE3		2.39473e-15	-0.448062	GMDS		4.78987e-14	-0.614903	DPY30		4.91671e-15	-0.61245
1389	FUCA1		1.8346e-43	-0.119674	TOP2A	Known disease genes	3.84706e-39	-0.0275649	TRPM4		1.25706e-43	0.00814103	AGT		8.55516e-19	-0.40533	LMNB2		2.42208e-15	-0.44805	AIFM1		4.85749e-14	-0.614452	ZC3H12C		4.92366e-15	-0.611881
1390	SRSF9		1.85496e-43	-0.11923	NOC2L		4.17505e-39	-0.0274675	ARF4		1.27685e-43	0.00814227	SLC15A2	Known disease genes	8.60157e-19	-0.404212	CD44		2.44376e-15	-0.447958	NSUN5		4.96017e-14	-0.614345	TWF1		4.94621e-15	-0.611787
1391	EXOSC4		1.87351e-43	-0.118318	TRIM38		4.33556e-39	-0.0274009	ZNF217		1.28677e-43	0.00815377	NOXA1		8.67534e-19	-0.403863	ANP32E		2.53395e-15	-0.447925	UAP1		4.96983e-14	-0.61367	ROPN1L	Prognostic genes	4.94708e-15	-0.611746
1392	SAT2		1.92904e-43	-0.118001	TAGLN2		4.67031e-39	-0.0274006	HGS		1.29483e-43	0.0081618	ZNF331		9.15113e-19	-0.403767	GPRC5A		2.54346e-15	-0.447229	ACAA2		5.11003e-14	-0.612352	DDX27		4.95431e-15	-0.611415
1393	BRAT1		2.15413e-43	-0.117919	AIMP2		4.73298e-39	-0.0274001	BOLA3		1.33308e-43	0.00817526	CEP95		9.34617e-19	-0.401218	HSDL2		2.57294e-15	-0.445361	GRTP1		5.24772e-14	-0.612094	TMEM138		4.96135e-15	-0.61039
1394	PRRC2A		2.2741e-43	-0.117708	TRAM1		4.86694e-39	-0.0272582	E2F3		1.5311e-43	0.008188	CHST15		9.64939e-19	-0.401196	RAMP1		2.57934e-15	-0.445283	CKS1B		5.27297e-14	-0.611375	FAM184A		4.99403e-15	-0.609823
1395	ACTN1		2.28172e-43	-0.116394	YOD1		4.95664e-39	-0.0272129	ELK4		1.57362e-43	0.00819689	XPO6		1.00105e-18	-0.400713	MYL6B		2.5899e-15	-0.445053	PHLDA2		5.29608e-14	-0.611066	CASZ1		5.04012e-15	-0.608145
1396	BABAM1		2.78562e-43	-0.116297	SLC39A10		5.38502e-39	-0.0271451	RPS6KA3		1.72092e-43	0.00820231	RAB14		1.0233e-18	-0.400657	SULT1A1		2.5985e-15	-0.444984	TBC1D2B		5.31552e-14	-0.610852	TMEM190		5.1163e-15	-0.606958
1397	CTSE		3.06284e-43	-0.1157	PLAGL1		5.48622e-39	-0.0271001	AGPAT2		1.72783e-43	0.0082064	GEMIN7		1.03281e-18	-0.400436	ACAD8		2.61907e-15	-0.444876	SRD5A1		5.32279e-14	-0.610379	AGK		5.15696e-15	-0.606204
1398	SH3GLB1		3.11222e-43	-0.11566	MYLK		5.80565e-39	-0.0270586	SBK1		1.92679e-43	0.00821035	SDHAF3		1.05643e-18	-0.400354	BCL2L12		2.65279e-15	-0.44353	LYZ		5.32279e-14	-0.60993	ADGRD1		5.1865e-15	-0.606204
1399	YOD1		3.17099e-43	-0.114593	PDAP1		5.82068e-39	-0.0268908	PDE4C		2.1201e-43	0.00824107	ULK2		1.0725e-18	-0.400238	XPO6		2.72978e-15	-0.443327	ZNF7		5.34416e-14	-0.609885	THOC3		5.22507e-15	-0.605871
1400	TMEM231		3.52816e-43	-0.114093	TMEM184B		6.13079e-39	-0.0268716	LYPLA1		2.16597e-43	0.00824145	SFTPA1		1.0815e-18	-0.40015	SCG5		2.73109e-15	-0.443089	MRTO4		5.51067e-14	-0.60974	UBQLN4		5.28309e-15	-0.605776
1401	CSNK1D		4.5221e-43	-0.112699	IDI1		6.21622e-39	-0.0268463	SULT1C2		2.17433e-43	0.0082673	SOCS3		1.10295e-18	-0.399839	PLA2G1B		2.76323e-15	-0.442347	WDR4		5.51812e-14	-0.609602	MRPL53		5.34964e-15	-0.605762
1402	FAM104A		5.26673e-43	-0.110761	VEZT		6.23019e-39	-0.0268163	SEC62		2.20144e-43	0.00826781	CENPW	Prognostic genes	1.10295e-18	-0.399415	TNFAIP3		2.77149e-15	-0.442063	COA4		5.70572e-14	-0.609045	LYRM9		5.66392e-15	-0.605121
1403	NAA50		5.51168e-43	-0.109573	CCDC30		6.26913e-39	-0.0267591	PRRX2		2.29367e-43	0.00826838	WFDC2	Prognostic genes	1.10459e-18	-0.398933	C9orf24		2.78902e-15	-0.441727	AIMP2		5.72274e-14	-0.608208	SLC22A18		5.67171e-15	-0.604563
1404	HYDIN		6.78006e-43	-0.108765	FBXW5		7.09822e-39	-0.0267582	TPM1		2.39352e-43	0.00828932	CXCL16		1.11342e-18	-0.398592	SNRNP25		2.87263e-15	-0.440798	GJB2		5.87055e-14	-0.607784	NOP16		5.69234e-15	-0.60429
1405	MT-CYB		6.80665e-43	-0.105709	BRD4		7.22292e-39	-0.0267578	CERS6		2.48312e-43	0.00829237	PSPH		1.12243e-18	-0.398091	FAM13B		2.87263e-15	-0.440593	NOP56	Known disease genes	5.87473e-14	-0.607118	CDK5RAP3		5.71723e-15	-0.604079
1406	PIM1		7.56854e-43	-0.103808	DBNL		7.79909e-39	-0.0267349	KCNQ3		2.57995e-43	0.00829684	TRIB3		1.12368e-18	-0.396968	RAPGEF2		2.90829e-15	-0.439904	EFEMP2		6.08276e-14	-0.605996	AKIRIN2		5.72331e-15	-0.602622
1407	LAMC1		7.70539e-43	-0.101605	PFDN6		7.80833e-39	-0.026645	C3orf14		2.59455e-43	0.00829937	B3GALNT2		1.1371e-18	-0.396955	SMIM15		2.93035e-15	-0.438992	SHC1		6.11183e-14	-0.605375	RNASEH2A		5.79542e-15	-0.60257
1408	IK		7.86903e-43	-0.10077	DEPTOR		7.85737e-39	-0.0266081	GBP2		2.62102e-43	0.00833031	TARBP1		1.1389e-18	-0.396878	WDR47		3.00755e-15	-0.438983	MOGS		6.37556e-14	-0.605323	UBXN4		5.9581e-15	-0.602385
1409	DNMT1		7.95776e-43	-0.0989336	SFT2D2		7.9747e-39	-0.0265422	PPP1R35		2.74482e-43	0.00833318	ZNF512B		1.15629e-18	-0.396523	COA6		3.01091e-15	-0.438522	CENPH		6.54296e-14	-0.605161	UBAP2L		5.99594e-15	-0.602146
1410	PPP1CB		8.82766e-43	-0.0974465	PHF14		8.47212e-39	-0.0265137	PSMA3		3.13107e-43	0.00834932	NELFA		1.15629e-18	-0.396068	HLTF		3.05746e-15	-0.438322	CFAP43		6.57935e-14	-0.60494	CBX1		6.13613e-15	-0.602099
1411	RYR1		9.10828e-43	-0.0966324	SYT12		9.11774e-39	-0.0265021	IGFBP6		3.52209e-43	0.00835294	AMMECR1		1.1609e-18	-0.395647	SAAL1		3.06271e-15	-0.437719	RAB32		6.58754e-14	-0.60463	PTPRG		6.19376e-15	-0.601083
1412	SAXO2		9.25627e-43	-0.0958287	SYF2		9.3565e-39	-0.0265011	TPRKB		3.61845e-43	0.00835314	ACER3		1.16994e-18	-0.395468	NFE2L3		3.07271e-15	-0.437651	MARVELD3		6.6214e-14	-0.60449	IDH2		6.2964e-15	-0.600888
1413	GNG11	Known disease genes	9.64308e-43	-0.0928587	UBL5		9.38234e-39	-0.0264903	PTBP3	Prognostic genes	4.09758e-43	0.00836423	ERI2		1.20787e-18	-0.395355	SNF8		3.08604e-15	-0.437272	FOS		6.64819e-14	-0.60416	BICD2		6.30712e-15	-0.600864
1414	TCN2		1.00474e-42	-0.0922226	NSF		9.65374e-39	-0.0264735	NET1		4.51281e-43	0.00837196	ACOXL		1.22681e-18	-0.394735	MAGOHB		3.17902e-15	-0.437255	PSMB4		6.68478e-14	-0.60399	ZDHHC18		6.72087e-15	-0.600488
1415	DNAJC7		1.05544e-42	-0.0913317	TNNC1		1.09129e-38	-0.02642	TTC21A		4.54522e-43	0.00837908	MCCC2		1.25499e-18	-0.394697	MTFP1		3.25057e-15	-0.437251	S100A8		6.9331e-14	-0.603914	CRELD2		6.72087e-15	-0.60048
1416	TAF9		1.1184e-42	-0.0896213	NABP2		1.11216e-38	-0.0264056	ACTN1		5.19046e-43	0.00838168	MYLK		1.31608e-18	-0.394375	PRPF40B		3.32656e-15	-0.437237	CDK5RAP1		7.11644e-14	-0.603874	CEP95		7.01355e-15	-0.600294
1417	ZBTB8OS		1.17429e-42	-0.0887887	IVNS1ABP		1.12075e-38	-0.0263881	IER5L		5.24756e-43	0.00839973	SSH2		1.32944e-18	-0.394086	NDUFAF6		3.49548e-15	-0.436789	POLR1C		7.47852e-14	-0.603787	RANBP1		7.10123e-15	-0.599791
1418	UQCR10		1.24646e-42	-0.08547	CARHSP1		1.12433e-38	-0.0263655	ALG3		5.66521e-43	0.00840298	GLB1L2		1.38289e-18	-0.393337	NTMT1	Prognostic genes	3.53118e-15	-0.436244	UCHL5		7.58835e-14	-0.603765	ALDOA	Known disease genes	7.21602e-15	-0.599118
1419	SLC35E1		1.26551e-42	-0.0840366	YBEY		1.12906e-38	-0.0263174	PDXK		5.66603e-43	0.00841504	SF3B4		1.39061e-18	-0.3931	SGPP2		3.65745e-15	-0.435714	METTL18		7.68728e-14	-0.603069	ENC1		7.22421e-15	-0.598846
1420	LSM10		1.27247e-42	-0.0839325	PSMA7		1.1525e-38	-0.0263085	PLGRKT		6.08555e-43	0.00842294	KRT18		1.40038e-18	-0.392627	PNPT1		3.66328e-15	-0.434662	DNAJC9		7.7233e-14	-0.602923	NMRAL1		7.25975e-15	-0.598788
1421	CDK16		1.27282e-42	-0.073849	ASAH1		1.19692e-38	-0.026241	RPS19BP1		6.14178e-43	0.00843078	GOLGA3		1.46782e-18	-0.392286	RHBDD3		3.73716e-15	-0.43426	WASF2		7.84036e-14	-0.602107	CARD6		7.96162e-15	-0.598645
1422	BBOF1		1.29895e-42	-0.0734213	PPP1R9B		1.20149e-38	-0.026217	UCHL3		6.35143e-43	0.00843109	TMEM216		1.46903e-18	-0.391705	FUNDC1		3.73997e-15	-0.433766	KRT8		7.90763e-14	-0.601825	TRUB2		8.16103e-15	-0.598631
1423	POLR2G		1.46376e-42	-0.0577181	PARP9		1.21016e-38	-0.0261659	ARPC5L	Prognostic genes	6.79374e-43	0.00844523	POLR3A		1.49506e-18	-0.390643	CCZ1B		3.88491e-15	-0.433482	UBQLN4		8.06735e-14	-0.601823	RYBP		8.18093e-15	-0.598383
1424	RAB36		1.51678e-42	0.0673649	SHISA4		1.21425e-38	-0.0261271	CNOT11		6.82679e-43	0.00845525	LAPTM5		1.51653e-18	-0.390316	TAPT1		3.91679e-15	-0.433182	ENC1		8.25016e-14	-0.601769	TPI1	Known disease genes / Prognostic genes	8.22047e-15	-0.598336
1425	GALNT7		1.58869e-42	0.0784375	MFSD2A		1.46983e-38	-0.0261197	MRPL10		7.02728e-43	0.00845724	PARP2		1.53439e-18	-0.389959	SPTB		3.96665e-15	-0.433088	SRP9		8.32326e-14	-0.601657	FOXO1		8.28742e-15	-0.598187
1426	SATB1	Known disease genes	1.61144e-42	0.0834074	GON4L		1.47575e-38	-0.0261149	DFFA		7.02728e-43	0.00846876	TMCO1		1.54863e-18	-0.38995	REPS2		4.29801e-15	-0.433041	FOXK2		8.34371e-14	-0.6003	UVRAG		8.38899e-15	-0.598044
1427	LZTS2		1.63662e-42	0.0838172	SLC5A3		1.64931e-38	-0.026056	PSMA1		7.1334e-43	0.00847709	NAA10	Known disease genes	1.55319e-18	-0.389859	CLDN3		4.37482e-15	-0.432803	ADAR		8.35237e-14	-0.600275	EHD4		8.50671e-15	-0.597926
1428	RPSA	Known disease genes	1.67714e-42	0.0853185	RAB5C		1.76137e-38	-0.0259602	TRIM56		7.93402e-43	0.00848278	ABCF2		1.56155e-18	-0.38936	GCHFR		4.38206e-15	-0.432412	TWF1		8.37024e-14	-0.600214	PHF6		8.77534e-15	-0.597562
1429	SCYL1		1.95183e-42	0.0911483	FAM189B		1.77948e-38	-0.0257469	PSME1		8.45955e-43	0.00849852	IL17RA		1.56356e-18	-0.389347	CASP1		4.40416e-15	-0.431725	SARAF		8.41352e-14	-0.600157	TAF2		8.82171e-15	-0.597559
1430	SPDEF		2.14583e-42	0.0913869	C12orf75		1.83126e-38	-0.0256928	DNAH5		8.64488e-43	0.00851849	EFTUD2		1.57355e-18	-0.388899	CLPTM1L	Known disease genes / Prognostic genes	4.46346e-15	-0.430166	RPN2		8.53803e-14	-0.598389	ACSL1		8.95319e-15	-0.597327
1431	ISYNA1		2.38587e-42	0.0932599	PALMD		1.96256e-38	-0.025673	FAM174A	Prognostic genes	9.01487e-43	0.00851978	HNRNPL		1.68891e-18	-0.38868	CAPN5		4.50805e-15	-0.430113	FLCN		8.73899e-14	-0.598372	CALU		8.9898e-15	-0.596889
1432	VAMP8		2.39537e-42	0.0939135	ARHGEF16		1.99086e-38	-0.0256137	DTX3L		1.06775e-42	0.00854452	TFAP2C		1.74198e-18	-0.388514	MRPL36		4.59958e-15	-0.430071	FGF18		9.03931e-14	-0.59789	RNF146		8.9951e-15	-0.596871
1433	PCNA		2.43551e-42	0.0940607	PROCR		2.03532e-38	-0.0255164	PLA2G4F		1.17275e-42	0.00855012	FGD6		1.75498e-18	-0.387818	C5orf22		4.81557e-15	-0.429607	PSMD4		9.16516e-14	-0.597886	NIPSNAP3A		9.12811e-15	-0.596419
1434	TRIO		2.58519e-42	0.094861	MAP3K9		2.03747e-38	-0.0254576	RPS6KA2		1.29463e-42	0.00855166	U2SURP	Prognostic genes	1.84463e-18	-0.387687	SLBP	Prognostic genes	4.81876e-15	-0.429362	CCDC92		9.18375e-14	-0.597097	WDR45B		9.23802e-15	-0.594919
1435	HSPH1		2.73893e-42	0.095075	SMURF2		2.05474e-38	-0.0254336	SOX2	Known disease genes	1.41604e-42	0.00855366	FLRT3		1.85887e-18	-0.38754	TMED2		4.83653e-15	-0.428547	PABPC4	Known disease genes	9.20603e-14	-0.596375	TMED2		9.25276e-15	-0.593823
1436	PDE9A		2.79465e-42	0.096543	OXLD1		2.06732e-38	-0.0254243	MAP1B		1.57311e-42	0.00856501	RAB34		1.86056e-18	-0.387176	EFTUD2		4.84265e-15	-0.428123	SRRT		9.22706e-14	-0.596116	PSME4		9.41767e-15	-0.593404
1437	MEGF11		2.98456e-42	0.0989923	SLFN13		2.15254e-38	-0.0253768	INTS1		1.57833e-42	0.00857544	TSFM		1.89628e-18	-0.386269	SRCIN1		4.92826e-15	-0.427904	ABCC10		9.50663e-14	-0.59581	LSM12		9.44805e-15	-0.592949
1438	SNRPD1		3.00283e-42	0.0991096	TFG		2.27387e-38	-0.0253584	OSTC		1.59846e-42	0.00858164	SRF		1.90314e-18	-0.386072	NR2F6		5.10777e-15	-0.427437	HDHD3		9.60815e-14	-0.594471	ANXA6		9.62014e-15	-0.592615
1439	CCDC107		3.39466e-42	0.0993413	PGPEP1		2.36579e-38	-0.0253249	CCT4		1.59846e-42	0.0085937	MED8		1.98419e-18	-0.384157	NR4A1		5.19012e-15	-0.426623	DRC1	Prognostic genes	9.63118e-14	-0.593888	DENND4A		9.65016e-15	-0.592568
1440	TMEM159		3.55909e-42	0.103185	PPARD	Prognostic genes	2.44472e-38	-0.0252196	TIPARP		1.90097e-42	0.00859499	SNRPA		1.98419e-18	-0.384107	CTSO		5.21338e-15	-0.425509	DNASE1		9.74543e-14	-0.593634	TOM1L1		9.76401e-15	-0.591959
1441	NETO2		3.63848e-42	0.103618	PLTP		2.62646e-38	-0.0251041	NEURL1B		2.08871e-42	0.00859561	SMARCA5		2.05774e-18	-0.383154	WDR3		5.36453e-15	-0.425334	NSMF		9.75794e-14	-0.593081	BLOC1S4		9.77479e-15	-0.590988
1442	RALBP1		3.92638e-42	0.10456	NOP16		2.66207e-38	-0.025103	PELO		2.37086e-42	0.00860289	PIGC		2.1038e-18	-0.382951	USP28		5.40196e-15	-0.424098	GMNN		9.84087e-14	-0.592396	NONO		9.87919e-15	-0.590946
1443	NOL7		4.31218e-42	0.1047	SH3GL1	Prognostic genes	2.68604e-38	-0.0250627	SUPT5H		2.42519e-42	0.00861295	EXOSC4		2.117e-18	-0.382631	RPN2		5.42906e-15	-0.423619	SLC35A2		9.88058e-14	-0.591352	AK4		9.95578e-15	-0.590515
1444	RPS19BP1		4.51339e-42	0.106938	CDC42SE2		2.71681e-38	-0.0250585	EPHA2		4.0036e-42	0.00861594	SAC3D1		2.18557e-18	-0.382433	MRPL37		5.48279e-15	-0.423404	SREBF2		1.00449e-13	-0.591257	HLA-DOA		9.97198e-15	-0.590274
1445	NOL3		4.58543e-42	0.107208	TK1	Known disease genes / Prognostic genes	3.04081e-38	-0.0250395	BAIAP2L1		4.03675e-42	0.00861763	RUVBL1		2.22305e-18	-0.381918	PRPF19		5.48394e-15	-0.42314	NOL6		1.02239e-13	-0.590488	SLPI		1.01442e-14	-0.590269
1446	NDUFB9		5.27636e-42	0.108838	C9orf116		3.48309e-38	-0.0249529	PML		5.35138e-42	0.0086294	GOLPH3L		2.23207e-18	-0.381205	FOXN3		5.57844e-15	-0.422542	ZDHHC2		1.0388e-13	-0.589322	PDCD6IP		1.02339e-14	-0.590017
1447	CDKN2B	Known disease genes	5.61781e-42	0.109679	CNN3		3.48431e-38	-0.0249354	DCTPP1		5.35138e-42	0.00864396	IMP4		2.29554e-18	-0.381132	MPDZ		5.59954e-15	-0.42216	YKT6		1.05154e-13	-0.589145	ARAP1		1.02981e-14	-0.589849
1448	ZNF706		5.70848e-42	0.110101	USE1		3.53619e-38	-0.0248889	FBXW5		5.45188e-42	0.00866312	CASP2		2.31019e-18	-0.380936	PRSS22		5.97828e-15	-0.422149	HPS3		1.09095e-13	-0.588923	PCNA		1.03185e-14	-0.588468
1449	DDX52		5.98111e-42	0.110679	PSMC4		3.64314e-38	-0.0248885	DUOXA1		6.34875e-42	0.00866559	DDR1		2.41395e-18	-0.380794	YTHDF1		6.15353e-15	-0.422111	PMS2		1.0925e-13	-0.588141	FUNDC1		1.04321e-14	-0.588306
1450	SNRNP25		6.80026e-42	0.110781	BET1L		4.94181e-38	-0.0248668	SNX9		6.35673e-42	0.00866806	APEX1	Known disease genes	2.42793e-18	-0.379065	PLAGL1		6.16849e-15	-0.421682	NCOA4		1.0925e-13	-0.587606	FTSJ1		1.05759e-14	-0.588157
1451	FGF9		6.84775e-42	0.112592	CTNNBIP1		5.27846e-38	-0.0248629	NR2F2		6.40364e-42	0.00867986	SMARCA2		2.47279e-18	-0.378588	LTA4H		6.21349e-15	-0.421505	KPNA5		1.10947e-13	-0.587046	YDJC		1.0694e-14	-0.587176
1452	MTHFD2		7.51321e-42	0.112813	ECE2		5.44032e-38	-0.0248374	DGKD		6.61805e-42	0.00868523	LRIG3		2.48029e-18	-0.378352	THOC3		6.29704e-15	-0.421441	DSG2		1.11965e-13	-0.586914	KLHL23		1.07402e-14	-0.586754
1453	CCT4		1.0366e-41	0.113044	TIMM8A		5.44399e-38	-0.02473	TMEM106C		6.72202e-42	0.00868653	LSM5		2.48053e-18	-0.37822	SETD3		6.31083e-15	-0.421093	GUCD1		1.12659e-13	-0.586809	NOL6		1.07619e-14	-0.586405
1454	RPN1		1.054e-41	0.113587	BTF3L4		5.96457e-38	-0.024729	VDAC1		7.48786e-42	0.00868836	BASP1		2.60164e-18	-0.377872	GPX2		6.43525e-15	-0.420779	DYNC2H1		1.14903e-13	-0.586719	GSS		1.09091e-14	-0.585459
1455	HYOU1		1.0594e-41	0.113604	GALNT10		5.97349e-38	-0.024698	HEXB		8.57693e-42	0.0086884	PDCD11		2.76008e-18	-0.376277	LYPLA2		6.46023e-15	-0.420676	PCNA		1.16733e-13	-0.586255	TSKU		1.09475e-14	-0.585322
1456	SLC22A31		1.13797e-41	0.113954	BAIAP2L1		6.20603e-38	-0.0246777	DTX4		8.88252e-42	0.00869621	PRCC		2.83814e-18	-0.376057	B4GALT4		6.48757e-15	-0.420211	EFTUD2		1.17809e-13	-0.586101	CAMK2N1		1.10863e-14	-0.58464
1457	GDI2		1.35795e-41	0.114092	GRAMD1A		6.56238e-38	-0.0246573	EIF3J		9.43045e-42	0.00870979	BMF		2.90747e-18	-0.375661	AATK	Known disease genes	6.7092e-15	-0.419292	USB1		1.19802e-13	-0.586086	CLTC		1.10863e-14	-0.584588
1458	LGALS9		1.38588e-41	0.114214	SHMT2		6.76806e-38	-0.0245835	STEAP1		9.69929e-42	0.00871109	YIPF1		2.99677e-18	-0.375579	NR2C2AP		6.87836e-15	-0.418028	GOLGA5		1.2088e-13	-0.585791	ZMYND10		1.14126e-14	-0.583639
1459	SHC2		1.41229e-41	0.11436	DEAF1		6.91083e-38	-0.0245802	VSIG1		1.09374e-41	0.00871112	TPD52		3.19231e-18	-0.375277	MBP		7.02135e-15	-0.417363	GRN		1.22265e-13	-0.585742	CCZ1		1.15909e-14	-0.581189
1460	CNP		1.51962e-41	0.116083	TSPAN17		7.0823e-38	-0.0245703	SRI		1.37037e-41	0.00871905	WDR55		3.28714e-18	-0.374848	TTLL7		7.08245e-15	-0.417327	SHE		1.25309e-13	-0.584807	UBE2S		1.19079e-14	-0.578728
1461	DLGAP4		1.55053e-41	0.11696	RAPH1		7.33199e-38	-0.024552	RAB1A		1.40743e-41	0.00872165	GLMP		3.36619e-18	-0.374845	HEBP1		7.17771e-15	-0.41702	COA1		1.29875e-13	-0.584588	ENTPD6		1.1945e-14	-0.578563
1462	MRTO4		1.61451e-41	0.117985	NDUFS6		7.36368e-38	-0.0245185	DNMT1		1.46328e-41	0.00872311	ERV3-1		3.47392e-18	-0.374749	E2F1		7.35756e-15	-0.416834	HNRNPL		1.36335e-13	-0.583234	BET1		1.19676e-14	-0.578324
1463	MRPL24		1.65822e-41	0.118012	DTX2		7.76141e-38	-0.0244943	SIVA1		1.46433e-41	0.00872782	EIF6		3.50839e-18	-0.374289	NOMO1		7.43122e-15	-0.41637	DNAAF1		1.38601e-13	-0.582602	FOXO3	Known disease genes	1.2031e-14	-0.578083
1464	BCR		1.68779e-41	0.118365	AIF1L		7.765e-38	-0.0244753	GON4L		1.63655e-41	0.0087311	LST1		3.51312e-18	-0.373622	FAAP100		7.55423e-15	-0.415587	TXNIP		1.39392e-13	-0.581408	CHURC1		1.2236e-14	-0.57716
1465	GFER		1.74625e-41	0.118399	LSM4		8.15743e-38	-0.0244606	ILF3		1.91675e-41	0.00876575	ADAM15		3.55629e-18	-0.373274	CCDC86		7.64132e-15	-0.415096	CLIC2		1.41879e-13	-0.579581	VSIG10		1.24926e-14	-0.577129
1466	RPL21		1.78754e-41	0.118628	FLAD1		8.65605e-38	-0.0244374	TGFB1		2.01495e-41	0.00877371	RRM1	Known disease genes	3.57137e-18	-0.372916	LRPPRC		7.91468e-15	-0.415077	BCL2L15		1.47968e-13	-0.579281	APIP		1.24926e-14	-0.576741
1467	HACD4		1.81605e-41	0.118656	SF3B6		9.60627e-38	-0.0244118	ZNF322		2.2879e-41	0.00877685	ADAR		3.653e-18	-0.372838	MPHOSPH10		8.01087e-15	-0.414271	TMEM132A		1.52977e-13	-0.579167	SLC2A3		1.27585e-14	-0.576268
1468	WDR45B		1.93484e-41	0.118811	SIRT7		9.66507e-38	-0.024397	CLTB		2.6177e-41	0.00878873	ATP1B1	Prognostic genes	3.73643e-18	-0.37225	RYBP		8.15111e-15	-0.414003	CLPTM1L	Known disease genes / Prognostic genes	1.54518e-13	-0.578709	XPOT		1.28709e-14	-0.575126
1469	FAM120AOS	Prognostic genes	2.10387e-41	0.119348	SGCE		9.87865e-38	-0.024356	CSNK1E	Known disease genes	3.75237e-41	0.00881087	CD302		3.861e-18	-0.37148	NIPSNAP3A		8.23038e-15	-0.413935	LY6D		1.59473e-13	-0.578498	PPIL6		1.35576e-14	-0.574451
1470	PELO		2.1081e-41	0.119725	ITPR3		1.02076e-37	-0.0243454	TMEM176B		3.76313e-41	0.00882365	GRB7		3.92376e-18	-0.371368	LSS		8.36293e-15	-0.41349	C1QC		1.61027e-13	-0.576836	DEPTOR		1.41692e-14	-0.573373
1471	PRPS2		2.17436e-41	0.119917	STX1A		1.03303e-37	-0.0243241	TMEM184A		4.04732e-41	0.00883284	DPAGT1		3.96528e-18	-0.371226	FASTK	Known disease genes	8.48364e-15	-0.413334	LCLAT1		1.61218e-13	-0.576829	DSP		1.43721e-14	-0.572509
1472	SAR1B		2.19155e-41	0.120096	ZNF480		1.10427e-37	-0.024292	CLNS1A		4.10746e-41	0.00885868	PPARG		4.00706e-18	-0.371182	SCRIB		8.52229e-15	-0.412943	AIF1		1.63921e-13	-0.576824	RTN4RL2		1.46302e-14	-0.572505
1473	DCTPP1		2.24735e-41	0.120537	PTGS2		1.11011e-37	-0.0242702	CD55	Prognostic genes	4.41195e-41	0.00886589	TSPAN14		4.02169e-18	-0.37113	ERAL1		8.77464e-15	-0.412882	SAR1A		1.64676e-13	-0.576222	UGGT1		1.50361e-14	-0.572472
1474	ANKRD10		2.29455e-41	0.121305	SHROOM1		1.23079e-37	-0.0242568	IL37		4.50931e-41	0.00887834	CDYL		4.09816e-18	-0.370734	TMEM138		9.20464e-15	-0.412783	VAT1		1.66427e-13	-0.576146	MSH6	Known disease genes	1.51349e-14	-0.572262
1475	TPM1		2.32938e-41	0.121904	VPS72		1.33193e-37	-0.0242035	BCKDK		5.36083e-41	0.00888185	PRPS2		4.28332e-18	-0.370492	KCNQ3		9.28702e-15	-0.412511	SNX10		1.67182e-13	-0.575931	DCDC2		1.53052e-14	-0.57217
1476	RRP1		2.63228e-41	0.122346	TNRC18		1.34533e-37	-0.0241868	METTL7B		5.81474e-41	0.00888241	MTERF3		4.33632e-18	-0.370219	SEC24A		9.33826e-15	-0.412347	JUN		1.67542e-13	-0.575857	PXMP4		1.53219e-14	-0.572149
1477	TDG		2.79763e-41	0.12277	CAPG	Known disease genes	1.36788e-37	-0.0239615	MAP7D1		6.00171e-41	0.00889165	PKIB		4.38452e-18	-0.370181	EHMT2		9.41974e-15	-0.412316	PKM	Prognostic genes	1.68138e-13	-0.575201	COPG1		1.54636e-14	-0.571874
1478	PCDH9		2.83988e-41	0.123686	AHCY	Known disease genes	1.39398e-37	-0.0239372	DENR		6.15998e-41	0.00889751	RAPGEF1		4.48404e-18	-0.369051	RSPRY1		9.62898e-15	-0.411913	ZBED4		1.69897e-13	-0.57517	ALDH1B1		1.55457e-14	-0.571597
1479	PCSK1N		3.07506e-41	0.123933	SARAF		1.40952e-37	-0.0239081	UBE2C		6.36697e-41	0.00889983	ENTPD5		4.57613e-18	-0.368971	RASSF8		9.65701e-15	-0.411326	U2SURP	Prognostic genes	1.73705e-13	-0.574662	USB1		1.61201e-14	-0.571365
1480	SLC38A10		3.07506e-41	0.12401	ITGB2		1.44639e-37	-0.0237548	ZNF431		6.39543e-41	0.00892148	CCDC24		4.79354e-18	-0.368584	UNC119		9.74041e-15	-0.41128	MSH6	Known disease genes	1.74269e-13	-0.574512	YTHDF1		1.61522e-14	-0.571334
1481	UBXN4		3.09495e-41	0.12429	TRIP10		1.50642e-37	-0.0237238	COX14		7.14698e-41	0.00892355	BSPRY		4.85154e-18	-0.368471	TRMT5	Prognostic genes	1.06117e-14	-0.411082	SLC16A10		1.74269e-13	-0.574081	NOP56	Known disease genes	1.63674e-14	-0.570989
1482	PSMD4		3.13314e-41	0.124699	YIPF2		1.75617e-37	-0.0237005	CELF1		7.60049e-41	0.00892559	OXLD1		4.90906e-18	-0.368069	HNRNPL		1.07856e-14	-0.410943	MORF4L2		1.77019e-13	-0.573714	MPHOSPH9		1.69691e-14	-0.570426
1483	RABL2B		3.13954e-41	0.124812	ILF3		1.86389e-37	-0.0236956	PIN4		8.98355e-41	0.0089328	RPS6KB2		5.19156e-18	-0.368012	EMC9		1.1052e-14	-0.410776	COIL		1.78246e-13	-0.573683	PCSK5		1.71508e-14	-0.569179
1484	NEU1	Prognostic genes	3.69947e-41	0.125022	C1orf53		1.9488e-37	-0.0235721	UBE2D3		8.98355e-41	0.00893576	FKBP14		5.28718e-18	-0.367962	SUN2		1.1066e-14	-0.410572	FHL2		1.79657e-13	-0.573534	DUSP8		1.72464e-14	-0.569076
1485	TUSC3		3.72143e-41	0.125116	RFNG		1.96238e-37	-0.023566	C1GALT1		9.01991e-41	0.00894051	HINFP		5.30187e-18	-0.367906	PRRC1		1.11105e-14	-0.410529	OSCP1	Prognostic genes	1.80339e-13	-0.572564	AKAP12		1.72513e-14	-0.568635
1486	SMPDL3A		3.75827e-41	0.125335	RNF187		2.00565e-37	-0.023503	ANOS1		9.15275e-41	0.00896266	MRPS34		5.37099e-18	-0.367644	CAPN12		1.12269e-14	-0.409481	HLA-DRA		1.81627e-13	-0.572542	ADGRG1		1.75296e-14	-0.568173
1487	RNASEH1		3.86181e-41	0.125638	DESI1		2.15218e-37	-0.0232735	KDM5B		9.23785e-41	0.00897912	FRK		5.43913e-18	-0.367518	ABCF2		1.13412e-14	-0.40881	HLA-DPA1		1.84474e-13	-0.571779	LSR		1.75836e-14	-0.568042
1488	CDH26		3.9776e-41	0.126128	CRB3		2.20178e-37	-0.0232407	COPB2		9.28077e-41	0.00898452	TELO2		5.79746e-18	-0.367149	PLXNA3	Prognostic genes	1.16381e-14	-0.408642	PARVA		1.88191e-13	-0.571417	KDSR		1.78171e-14	-0.56794
1489	FAM227A		4.398e-41	0.12656	COA6		2.24164e-37	-0.0232098	TBCA		9.64252e-41	0.00901173	PSME4		5.92492e-18	-0.366851	UGDH		1.1952e-14	-0.408309	GSS		1.94667e-13	-0.571333	B4GALT4		1.78219e-14	-0.56771
1490	PSME3		4.53111e-41	0.126607	HEXB		2.32569e-37	-0.0230968	CAPG	Known disease genes	9.97415e-41	0.00902525	S100PBP		5.96777e-18	-0.366581	TOPBP1		1.21146e-14	-0.408295	FREM2		1.97345e-13	-0.571267	SKI		1.8001e-14	-0.567244
1491	SEC62		4.96541e-41	0.126674	MAFK		2.40978e-37	-0.0230669	PYCARD		1.01624e-40	0.0090261	TRMT2A		6.10565e-18	-0.364929	KRT8		1.22373e-14	-0.407969	MGAT1		2.01517e-13	-0.570175	MOGS		1.8187e-14	-0.567156
1492	CLNS1A		5.20258e-41	0.12676	SPDEF		2.45749e-37	-0.0230234	NDUFB5		1.02994e-40	0.00902642	RIN2		6.15516e-18	-0.364585	TACO1		1.23403e-14	-0.407584	MACF1		2.06311e-13	-0.56983	HACD1		1.82424e-14	-0.566041
1493	SNRPC		5.35802e-41	0.126828	UGDH		2.61242e-37	-0.0230121	BARX2		1.06934e-40	0.00903596	GPX8		6.45967e-18	-0.364503	GUF1		1.23633e-14	-0.406735	TTPAL		2.06986e-13	-0.56932	RBBP5		1.82605e-14	-0.565435
1494	CPD		5.47629e-41	0.127526	PLGRKT		2.83048e-37	-0.0229965	SFPQ		1.20796e-40	0.0090381	ZNF281		6.73113e-18	-0.364108	AK1		1.25535e-14	-0.406366	SMIM15		2.10062e-13	-0.569271	CABLES1	Prognostic genes	1.84435e-14	-0.56509
1495	WASL		5.57746e-41	0.127568	RNF114		2.85423e-37	-0.0229015	PRSS8		1.23228e-40	0.00904943	ARAP2		7.12352e-18	-0.363614	KDM6B		1.25565e-14	-0.40615	MPP5		2.15918e-13	-0.568906	PRPF40B		1.88978e-14	-0.563557
1496	EPHA2		6.99793e-41	0.127651	SLC2A4RG		2.93044e-37	-0.0228677	AIMP2		1.25391e-40	0.00905447	CTPS2		7.22464e-18	-0.362822	METTL2A		1.25599e-14	-0.405834	TAF4		2.16774e-13	-0.568889	FOXK2		1.91097e-14	-0.562767
1497	SNRPB2		8.00995e-41	0.127776	NTPCR		2.93575e-37	-0.0227223	GGCX		1.2553e-40	0.00905967	CALR		7.32476e-18	-0.36267	NELFA		1.26399e-14	-0.405732	MAP3K4		2.22946e-13	-0.568477	ALPL		1.99425e-14	-0.562635
1498	DDA1		8.2525e-41	0.128155	SLC25A29		3.04079e-37	-0.0226886	PPARD	Prognostic genes	1.32566e-40	0.00905991	SARS2		7.51721e-18	-0.362302	FKBPL		1.27192e-14	-0.405212	CDH1		2.23158e-13	-0.568206	NFE2L2		2.01889e-14	-0.562496
1499	C20orf96		8.96555e-41	0.128281	TBRG4		3.48411e-37	-0.0226829	PKN1		1.33194e-40	0.0090623	SMPD4		7.69043e-18	-0.362285	TMED4		1.31891e-14	-0.405074	ZDHHC18		2.25297e-13	-0.567435	C6orf118		2.02808e-14	-0.562016
1500	UQCRFS1		9.19886e-41	0.128551	GGTLC1		3.56032e-37	-0.0226817	GAS6		1.33232e-40	0.00906826	RRP36		8.35155e-18	-0.362279	NOP16		1.3262e-14	-0.404925	SULT1A2		2.25379e-13	-0.567058	SAAL1		2.05158e-14	-0.561893
1501	COL17A1		9.44242e-41	0.12858	VEPH1		3.56213e-37	-0.0226764	STX10		1.34347e-40	0.00906841	SSR1		8.4042e-18	-0.360717	SLC12A7		1.32841e-14	-0.403873	MCM3		2.26215e-13	-0.566715	IFT57		2.08958e-14	-0.561554
1502	DNAJC8	Prognostic genes	9.90639e-41	0.128658	HNRNPD		3.5848e-37	-0.0226725	SDC3		1.36411e-40	0.00907275	RNASEH1		8.40929e-18	-0.360511	GTPBP4		1.34255e-14	-0.403824	BARD1		2.3329e-13	-0.566249	GORASP1		2.12736e-14	-0.560946
1503	ECE2		1.02248e-40	0.12939	MVB12A		3.6968e-37	-0.0226645	PDLIM7		1.3677e-40	0.00907468	RFC2		8.54198e-18	-0.359901	STYXL1		1.35727e-14	-0.403802	METTL21A		2.36255e-13	-0.565705	GRN		2.2886e-14	-0.560906
1504	CERS4		1.11218e-40	0.130194	SUPT6H		3.71087e-37	-0.0226321	CHI3L2		1.41608e-40	0.00907629	PLOD1		8.57282e-18	-0.359334	PDCD5		1.39335e-14	-0.403624	TMED4		2.36495e-13	-0.56506	ABTB1		2.29172e-14	-0.56085
1505	TYMP	Prognostic genes	1.14465e-40	0.130769	EVPL		3.79704e-37	-0.0226208	PDE4D		1.6642e-40	0.00910551	DDX41		8.62273e-18	-0.359321	SEZ6L2		1.4225e-14	-0.402053	NUP62		2.37315e-13	-0.564952	MX2		2.34225e-14	-0.559358
1506	RNF145		1.18843e-40	0.130776	MED1		3.9057e-37	-0.0224991	SHC2		1.70345e-40	0.00911355	VSIG1		8.9661e-18	-0.35917	FAM3C		1.42426e-14	-0.401797	PRRC1		2.40486e-13	-0.562874	EXOSC2		2.34932e-14	-0.559148
1507	ESYT2		1.23149e-40	0.130959	SGPL1		4.39156e-37	-0.0224	PAIP1		1.72878e-40	0.00912557	CRBN		9.41562e-18	-0.358429	WDR55		1.45889e-14	-0.401649	TRIP13		2.44912e-13	-0.562621	MEN1		2.37514e-14	-0.558048
1508	PTBP3	Prognostic genes	1.28077e-40	0.131564	RCC1		4.53137e-37	-0.0223965	SLC9A3R1		1.73743e-40	0.00914492	LPL		9.50761e-18	-0.35756	HSF4		1.52415e-14	-0.401554	PGAM5		2.49695e-13	-0.562605	POLM		2.40265e-14	-0.557882
1509	COL27A1		1.40792e-40	0.131613	PPM1G		4.6937e-37	-0.0222295	PSMC1		1.90637e-40	0.00914961	SLC25A22		9.62082e-18	-0.357484	TESC		1.5318e-14	-0.401546	NCALD		2.52652e-13	-0.562435	THRB		2.44702e-14	-0.557475
1510	CFAP70		1.47289e-40	0.131956	TGFBI		4.78184e-37	-0.0221567	DPM2		2.23621e-40	0.00915331	ZNF195		9.77359e-18	-0.357427	TSPAN7		1.54569e-14	-0.400896	C1orf109		2.5337e-13	-0.56149	CLASP2		2.55614e-14	-0.55695
1511	CACYBP		1.56503e-40	0.132219	RAP2B	Prognostic genes	4.96722e-37	-0.022117	TRNAU1AP		2.40431e-40	0.00915736	RDX		9.98338e-18	-0.357144	IRAK1BP1		1.5614e-14	-0.399907	DSN1		2.65787e-13	-0.560432	TXNIP		2.56462e-14	-0.556111
1512	NEDD9		1.56705e-40	0.132234	ADGRE2		4.97718e-37	-0.0221089	TPR		2.52867e-40	0.00916206	SPATA20		1.07932e-17	-0.356197	SHC1		1.57121e-14	-0.399818	MRPL15		2.68568e-13	-0.559957	MANEAL		2.58562e-14	-0.556107
1513	NSF		1.77152e-40	0.132292	DNM2		5.41229e-37	-0.0220622	VDAC2		3.29575e-40	0.00916529	ARMCX1		1.09505e-17	-0.356016	RPUSD1		1.58193e-14	-0.39954	SOX12		2.71102e-13	-0.55845	GOLGA5		2.58633e-14	-0.554739
1514	ARL4C		1.77239e-40	0.132414	WIPI2		5.58632e-37	-0.0220413	PLIN3		3.35177e-40	0.00916716	OSTC		1.12066e-17	-0.355267	CPSF1		1.58997e-14	-0.399328	REV3L		2.75838e-13	-0.557613	CEACAM5		2.59446e-14	-0.554191
1515	SPATS2		1.77304e-40	0.132569	MRPS31		5.9275e-37	-0.0220308	CCDC124		3.45804e-40	0.00917812	PAIP1		1.13585e-17	-0.354763	C1orf21		1.62115e-14	-0.398714	HS6ST2		2.91246e-13	-0.557192	CCDC170		2.60211e-14	-0.554175
1516	PLOD1		1.82479e-40	0.132686	IRS1		6.43594e-37	-0.0219915	SPATA17		3.94007e-40	0.00918282	RRS1	Known disease genes	1.16447e-17	-0.354572	RAB15		1.62608e-14	-0.398214	LCOR		2.93518e-13	-0.556963	SOD3		2.67664e-14	-0.553168
1517	STK33		2.13942e-40	0.132781	SLC39A7		6.43846e-37	-0.0219747	PSME3		3.99858e-40	0.00921439	TMEM106C		1.19853e-17	-0.354411	PRCC		1.65873e-14	-0.397783	NKRF		2.98985e-13	-0.556472	CAPN12		2.69135e-14	-0.553154
1518	ITM2B		2.38694e-40	0.132782	YWHAB		6.50083e-37	-0.0219302	PGM2L1		4.6067e-40	0.00922828	DUSP1		1.22031e-17	-0.3542	KDF1		1.72306e-14	-0.397283	RANBP1		3.06834e-13	-0.556355	PNRC2		2.70376e-14	-0.55244
1519	ERBB3		2.57407e-40	0.132804	ESRRA		6.52211e-37	-0.0219238	CD320		4.64543e-40	0.0092348	DUOXA1		1.25851e-17	-0.354114	ZBTB16		1.76081e-14	-0.397265	DPY30		3.08373e-13	-0.555543	PRPS2		2.76962e-14	-0.552234
1520	DOC2B		2.88136e-40	0.133039	TP53	Known disease genes	6.62069e-37	-0.0219034	TMEM63A		4.9783e-40	0.0092476	STAT5B		1.28059e-17	-0.353839	ELMO3		1.84683e-14	-0.397047	PRIM2		3.15176e-13	-0.555184	C1QC		2.82182e-14	-0.551812
1521	YWHAQ		3.03999e-40	0.133114	TLE1		6.71813e-37	-0.0218399	CAPNS1		6.03277e-40	0.00926881	VAMP3		1.28773e-17	-0.353704	B2M		1.86345e-14	-0.39681	KANK1	Prognostic genes	3.1579e-13	-0.555139	JUN		2.82273e-14	-0.551561
1522	GLO1		3.23561e-40	0.133509	CREB3L2		6.89457e-37	-0.0218384	ARF3		6.28086e-40	0.00928045	POLDIP2		1.31404e-17	-0.353375	PSMC4		1.89276e-14	-0.395406	GOLGA3		3.24485e-13	-0.552837	DNAL1		2.86709e-14	-0.551458
1523	MRPS10		3.6148e-40	0.133615	SEC24D		7.01452e-37	-0.0218111	KIF9		6.2956e-40	0.00928753	AHCTF1		1.31554e-17	-0.353255	FKBP4		1.92483e-14	-0.395102	USP44		3.27339e-13	-0.552816	CSF3R		2.86944e-14	-0.550371
1524	CSRP2		3.90068e-40	0.133872	SEC11C		7.29309e-37	-0.0217945	RAC3		7.44519e-40	0.00928799	NDUFS6		1.34239e-17	-0.353183	SNX24		1.93244e-14	-0.394998	SRD5A3	Prognostic genes	3.46318e-13	-0.552374	CCDC68		2.95442e-14	-0.549739
1525	SZRD1		3.98914e-40	0.133919	CHCHD10		7.41155e-37	-0.021722	CCT8		8.07724e-40	0.00929359	PABPC4	Known disease genes	1.36185e-17	-0.35305	NETO2		1.96036e-14	-0.39436	SRM	Known disease genes	3.52002e-13	-0.552227	SNRNP25		2.9565e-14	-0.549414
1526	SPEF1		3.98914e-40	0.133978	PIGS		7.62952e-37	-0.0217172	FNBP1L		8.33543e-40	0.00929934	MRPS5	Known disease genes	1.37154e-17	-0.352889	MCCC2		2.01867e-14	-0.394059	CPD		3.56588e-13	-0.552027	IDE		2.97961e-14	-0.548504
1527	PAICS		4.02891e-40	0.134119	CENPL		9.06091e-37	-0.0216829	MAP3K11		8.42061e-40	0.00931079	HID1		1.37841e-17	-0.352003	NFATC3		2.01867e-14	-0.393819	NABP2		3.58095e-13	-0.551555	SCEL		3.03411e-14	-0.548403
1528	PCDH1		4.33017e-40	0.134168	TAF7		9.11088e-37	-0.0216822	MYO19		8.47994e-40	0.00931195	CCL2		1.44714e-17	-0.351583	CDYL		2.04086e-14	-0.39336	LRRC20		3.63665e-13	-0.550398	EVI5		3.07714e-14	-0.548289
1529	FANK1		4.43919e-40	0.134366	BATF		9.12992e-37	-0.021674	SKP1		8.59028e-40	0.0093159	ITGA2		1.48197e-17	-0.351167	UNG		2.05806e-14	-0.393297	MOAP1	Prognostic genes	3.64015e-13	-0.549891	ITPK1	Prognostic genes	3.08355e-14	-0.546657
1530	NUDCD3		4.56131e-40	0.134512	CHD2		9.24572e-37	-0.0215314	IFI35	Prognostic genes	9.00457e-40	0.00932703	FCER1G		1.53378e-17	-0.35081	CTU2		2.0589e-14	-0.39284	HOOK1		3.70755e-13	-0.549074	TINF2		3.08938e-14	-0.546041
1531	LARP1		4.77222e-40	0.13469	NBEAL1		9.42911e-37	-0.0215029	AK9		9.02054e-40	0.00935117	TMED9		1.54577e-17	-0.350373	LEMD1		2.07078e-14	-0.392596	CDCA4	Prognostic genes	3.71025e-13	-0.548994	DPP3		3.09872e-14	-0.54511
1532	PIP5KL1		4.80014e-40	0.134983	OGT		9.43524e-37	-0.0214691	UBXN11		9.32858e-40	0.00935395	NOB1		1.56035e-17	-0.350286	MTMR6		2.07944e-14	-0.391955	TMEM138		3.72346e-13	-0.548751	HLA-DRA		3.18265e-14	-0.544631
1533	RFNG		5.07296e-40	0.135102	FUT8		9.74666e-37	-0.0214345	POLR3GL		9.94707e-40	0.00935656	NASP		1.56375e-17	-0.350079	PFDN2		2.08823e-14	-0.391808	TSEN54		3.74129e-13	-0.547952	TEX2		3.20263e-14	-0.543799
1534	AQP5		5.34436e-40	0.135107	SPOCK2		9.7545e-37	-0.0214118	SWAP70		9.99616e-40	0.00937598	SUPT7L		1.5638e-17	-0.349883	ATXN1L		2.09322e-14	-0.391777	CREBZF		3.7529e-13	-0.547704	C8orf34		3.25391e-14	-0.54353
1535	MSRB2	Prognostic genes	5.53245e-40	0.135112	BUD31		9.98185e-37	-0.0213868	BRIX1		1.05523e-39	0.00937741	POLD2		1.57014e-17	-0.34946	FOXO3	Known disease genes	2.11814e-14	-0.391748	RAPGEF5		3.86818e-13	-0.547015	ZNF480		3.27313e-14	-0.543239
1536	GCSH		5.63588e-40	0.135483	FAM120AOS	Prognostic genes	1.01715e-36	-0.0213554	VEZT		1.08813e-39	0.00939931	MORF4L2		1.57034e-17	-0.348782	ECHDC1		2.18251e-14	-0.391424	TBC1D15		3.87236e-13	-0.546977	AAMDC		3.28435e-14	-0.54261
1537	AK9		5.7298e-40	0.135519	GEMIN7		1.04673e-36	-0.0212741	ITM2B		1.08906e-39	0.00941085	UHMK1		1.61259e-17	-0.348243	RINT1		2.19793e-14	-0.39093	KLK11		3.87236e-13	-0.546883	TRAF2		3.3401e-14	-0.542213
1538	IL4R		5.73332e-40	0.135936	C1orf162		1.1042e-36	-0.0212659	RND3		1.1505e-39	0.00941388	JMJD4		1.62774e-17	-0.348205	MRPL17		2.22084e-14	-0.390589	XPC	Known disease genes	3.88435e-13	-0.546492	AMOTL2		3.37958e-14	-0.54201
1539	BRD4		6.08251e-40	0.135992	YWHAE		1.14163e-36	-0.021227	MEST		1.24521e-39	0.00942962	ETNK2		1.63332e-17	-0.348002	MRPS10		2.26135e-14	-0.390523	RRP1		3.98256e-13	-0.54619	SARAF		3.38837e-14	-0.541754
1540	SLC2A1	Prognostic genes	6.48277e-40	0.136141	NOS1AP		1.16216e-36	-0.0212167	MROH6		1.24521e-39	0.00943372	IRF3		1.67108e-17	-0.347799	CREBZF		2.29835e-14	-0.389841	NMRAL1		4.04648e-13	-0.545935	ATXN1L		3.42684e-14	-0.541675
1541	E2F3		6.55392e-40	0.136272	RNASEH1		1.16697e-36	-0.0211099	MTHFD1L		1.44687e-39	0.00943433	RAD51D		1.68973e-17	-0.347494	HCST		2.33095e-14	-0.389825	AR		4.07607e-13	-0.54539	SLCO3A1		3.48173e-14	-0.54155
1542	RCC1		7.18228e-40	0.136273	PYGL		1.21722e-36	-0.0210618	STEAP4		1.48799e-39	0.00943655	AHCY	Known disease genes	1.72494e-17	-0.347036	PDCD11		2.38535e-14	-0.389755	IFIT2		4.14096e-13	-0.545295	TBL2		3.51088e-14	-0.541153
1543	CMSS1		7.18228e-40	0.136412	CINP		1.5166e-36	-0.0210063	RABIF		1.67899e-39	0.0094446	APH1B		1.77056e-17	-0.346452	SLC41A2		2.45428e-14	-0.388943	WDR74		4.22675e-13	-0.544765	TSPAN4		3.54385e-14	-0.541144
1544	BET1L		7.79e-40	0.136644	RNF44		1.52933e-36	-0.0209856	RFK		1.71047e-39	0.00946023	SGK1		1.81267e-17	-0.345969	SF3B4		2.46979e-14	-0.388025	GCSH		4.2417e-13	-0.544594	PNPT1		3.68348e-14	-0.540872
1545	MLF2		8.51719e-40	0.13673	TMEM123		1.58529e-36	-0.0209565	MRPL4		1.76925e-39	0.00946759	SNRPC		1.83627e-17	-0.345895	DPY30		2.53871e-14	-0.387903	PIGU		4.29313e-13	-0.544188	KIAA1328		3.68667e-14	-0.540868
1546	FGD6		8.81306e-40	0.137488	EIF2S2		1.95846e-36	-0.0209153	SLC39A7		1.79033e-39	0.00947159	TMEM106B		1.84695e-17	-0.345157	MITD1		2.5471e-14	-0.387828	CALCOCO2		4.42778e-13	-0.543764	MAGI3		3.80892e-14	-0.540473
1547	NFKBIE		9.85352e-40	0.137682	ATP11A		2.09976e-36	-0.0209103	CLDN12		1.88576e-39	0.00947286	SNRPD1		1.85246e-17	-0.344915	SLC39A4		2.54974e-14	-0.387272	MTX1		4.44359e-13	-0.54345	HLA-DPA1		3.9427e-14	-0.540213
1548	MTPN		9.8638e-40	0.137703	BTBD2		2.49267e-36	-0.0208894	CREB3L2		2.1099e-39	0.00947368	ACAP3		1.883e-17	-0.344893	B4GALT7		2.5575e-14	-0.387154	MOV10		4.65441e-13	-0.542731	PTS		3.98988e-14	-0.539089
1549	SHC1		1.07501e-39	0.137822	FTSJ3		2.81861e-36	-0.0208618	BABAM1		2.11553e-39	0.00947569	PAFAH1B1		1.88817e-17	-0.344854	IMP4		2.57489e-14	-0.387098	LIG1		4.69044e-13	-0.542353	C1orf159		4.01564e-14	-0.538896
1550	GTF3C6		1.14362e-39	0.137945	YPEL3		2.81898e-36	-0.020791	MSR1		2.43508e-39	0.00947615	ETV6		1.8962e-17	-0.344564	RASSF1		2.57489e-14	-0.387096	DPP3		4.70306e-13	-0.542064	SMIM15		4.02645e-14	-0.538837
1551	SHMT2		1.31781e-39	0.138031	RABL2B		3.07062e-36	-0.0207657	BCL10	Prognostic genes	2.65133e-39	0.0094854	FBXO45		1.92545e-17	-0.344455	TLK1		2.58477e-14	-0.386912	AP1G2		4.70422e-13	-0.541966	CARD8		4.09493e-14	-0.538798
1552	PHB2		1.35304e-39	0.138055	CDCA7L		3.08912e-36	-0.0207175	LIMA1		2.67241e-39	0.00948873	SCNM1		2.0319e-17	-0.344428	SNRPA		2.64649e-14	-0.384892	DDOST	Prognostic genes	4.78929e-13	-0.541685	MACF1		4.15305e-14	-0.53843
1553	WFDC3		1.54916e-39	0.138265	UGP2		3.37867e-36	-0.0206898	KDR	Known disease genes	2.75743e-39	0.00949913	SPINT1		2.03303e-17	-0.343308	YIPF1		2.68767e-14	-0.384778	ADGRF5		4.95636e-13	-0.540824	MPHOSPH10		4.18508e-14	-0.538275
1554	GJA1		1.6445e-39	0.138363	ENO2		3.40293e-36	-0.0206739	NPDC1		2.85963e-39	0.00951705	CCNL2		2.04501e-17	-0.343078	ADAR		2.68815e-14	-0.384663	MTCH2		4.96256e-13	-0.540672	WASF2		4.20209e-14	-0.537684
1555	CC2D2A		1.65794e-39	0.138523	ZDHHC4		3.56814e-36	-0.0206528	MEX3D		2.95875e-39	0.00952842	BOLA3		2.11282e-17	-0.342421	MED8		2.70087e-14	-0.384563	CCDC43		4.9653e-13	-0.539643	SRRT		4.25143e-14	-0.537191
1556	FGFR2	Known disease genes	1.89436e-39	0.138557	RTN4RL2		4.19182e-36	-0.0206484	SGCE		2.99359e-39	0.00953414	P4HA1		2.23005e-17	-0.342175	ASGR1		2.72885e-14	-0.384388	NDUFAF7		4.97042e-13	-0.539345	MRPS10		4.29263e-14	-0.535697
1557	GANAB		2.00938e-39	0.138574	WDR46		5.16794e-36	-0.0205537	PPP1R15B		3.06753e-39	0.00953843	ERCC3		2.23158e-17	-0.341792	ZBTB21		2.74164e-14	-0.384199	NHSL2		4.99003e-13	-0.538696	ADIPOR2		4.3358e-14	-0.535458
1558	NDUFAF2		2.19086e-39	0.13874	COA3		5.27255e-36	-0.0205126	ENDOV		3.16858e-39	0.00954579	STX7		2.28755e-17	-0.341219	SLC35F5		2.82261e-14	-0.383073	TTLL4		5.02196e-13	-0.53843	CCDC28A		4.77976e-14	-0.535456
1559	BCL9L		2.85822e-39	0.138818	TRIM2		5.52648e-36	-0.0205086	R3HDM4		3.39137e-39	0.00954991	HAUS5		2.30948e-17	-0.341194	PER1		2.89969e-14	-0.381977	NIF3L1		5.02582e-13	-0.538357	CREBZF		4.79321e-14	-0.535174
1560	SDF2		2.94558e-39	0.139179	MTSS1		5.88035e-36	-0.0204596	BCL9L		3.64295e-39	0.00955447	MTCH2		2.33763e-17	-0.340243	POLR3A		3.00685e-14	-0.38174	LURAP1L		5.08255e-13	-0.538258	MRPL24		4.82553e-14	-0.535102
1561	RDH10		2.98364e-39	0.139534	CIB1		6.14827e-36	-0.0204429	FGD6		3.77953e-39	0.0095696	B3GAT1		2.35584e-17	-0.340118	TMCO1		3.03262e-14	-0.381503	WDR77		5.11087e-13	-0.537977	XYLT2		4.8846e-14	-0.534915
1562	RAPGEF5		3.07093e-39	0.139609	MTX1		6.25208e-36	-0.0204239	ANKLE2	Prognostic genes	3.80781e-39	0.00957567	PLLP		2.38088e-17	-0.339964	COL17A1		3.10639e-14	-0.381213	SLPI		5.15001e-13	-0.537557	PIGC		4.96992e-14	-0.534746
1563	OTULIN		3.48055e-39	0.139703	EMP2		6.35495e-36	-0.0204061	NDUFA12		3.90333e-39	0.00957708	SNX25		2.42866e-17	-0.339203	MOB3B		3.14231e-14	-0.380718	PLEKHA2		5.17065e-13	-0.537481	MOV10		5.0138e-14	-0.534035
1564	CXCL8		3.56559e-39	0.13987	KDM2A		6.4874e-36	-0.0203767	CDC42SE2		3.94619e-39	0.00958367	CPSF4		2.45817e-17	-0.338601	DPAGT1		3.25732e-14	-0.380025	HIPK3		5.25401e-13	-0.537142	METTL7B		5.18874e-14	-0.533825
1565	ENKUR		3.71294e-39	0.139891	ATOX1		7.00601e-36	-0.0203741	PARP9		4.22801e-39	0.00959565	VSTM2L		2.46811e-17	-0.338259	CDKN1A		3.27827e-14	-0.379578	TBL2		5.3488e-13	-0.537107	PPP1R35		5.37922e-14	-0.533597
1566	TRAF7		3.73803e-39	0.13992	MRPL27		7.02469e-36	-0.0202821	NUP62		4.57402e-39	0.00959729	GALNT2		2.60932e-17	-0.338172	SEC61G		3.29021e-14	-0.379087	PPM1G		5.44474e-13	-0.536998	VAT1		5.42584e-14	-0.532177
1567	CHST15		3.75201e-39	0.139922	FAM50A		7.64924e-36	-0.0202789	MAP1LC3A		5.10824e-39	0.00959942	TRIM47		2.66202e-17	-0.337145	FKBP10		3.29148e-14	-0.379003	TMEM64		5.65036e-13	-0.536857	DRC3		5.42674e-14	-0.531867
1568	PRELID2		3.76521e-39	0.139957	ELF3		7.73368e-36	-0.0202718	TBL1XR1		5.10824e-39	0.00960768	GALC		2.68355e-17	-0.337022	CASP2		3.33237e-14	-0.378295	TMCO1		5.68677e-13	-0.536787	PDCD5		5.43795e-14	-0.531836
1569	HNRNPUL1		4.4051e-39	0.139981	CD276		8.21777e-36	-0.0202118	TTC3		5.20219e-39	0.00961283	HSP90AB1		2.70733e-17	-0.336811	GRHL1		3.3601e-14	-0.377412	HPRT1		5.82952e-13	-0.535414	USP28		5.68549e-14	-0.531769
1570	AMIGO2		4.8292e-39	0.140034	GSTO2		8.22166e-36	-0.0201199	PEBP1		5.38925e-39	0.00961498	SS18L1		2.71885e-17	-0.336782	BTN3A3		3.39826e-14	-0.376879	PABPC1L		5.83457e-13	-0.535354	CAPSL		5.74004e-14	-0.531652
1571	HSD17B6		5.15784e-39	0.140095	BTBD6		9.40018e-36	-0.0199394	CAMLG		5.44594e-39	0.00961937	USP39		2.80381e-17	-0.336531	SGCE		3.48333e-14	-0.376708	PRR29		5.93225e-13	-0.534546	POLR3A		5.83666e-14	-0.531485
1572	ELF3		5.17502e-39	0.140167	ISYNA1		9.61558e-36	-0.0199311	MCM7		5.46735e-39	0.00962034	MAPK8IP3		3.10191e-17	-0.336319	PLEKHA1		3.60224e-14	-0.376554	GPD1L		6.29833e-13	-0.534438	SREBF2		5.92401e-14	-0.530389
1573	TNNT2		5.62506e-39	0.140186	PHACTR4		1.07496e-35	-0.0198263	SNRPB2		5.82437e-39	0.00962219	RAB8B		3.1325e-17	-0.336251	PIGC		3.62215e-14	-0.376451	ATAD3A		6.30444e-13	-0.534338	MAGOHB		5.9318e-14	-0.529482
1574	SRSF11		5.96171e-39	0.140279	PCDH9		1.14555e-35	-0.0197205	DDX46		5.92578e-39	0.00962337	GMPS		3.14636e-17	-0.336151	ERI2		3.6255e-14	-0.376141	ZNF587		6.50676e-13	-0.533494	FAM76A		6.02119e-14	-0.528812
1575	RBBP7		6.12463e-39	0.140474	GLRX5		1.19755e-35	-0.0196754	DTYMK		6.32953e-39	0.00962429	EEF1E1		3.15506e-17	-0.336006	HGD		3.64622e-14	-0.375499	FEM1A		6.89423e-13	-0.533196	RUVBL1		6.08091e-14	-0.527719
1576	GLRX2		6.21707e-39	0.140491	NUFIP2		1.2399e-35	-0.0196169	GDI2		6.32956e-39	0.00964032	MTPAP		3.1681e-17	-0.335282	TMEM216		3.66217e-14	-0.375078	TRAF7		6.91303e-13	-0.533076	KIFC2		6.15218e-14	-0.527485
1577	IGBP1		6.28171e-39	0.140648	VCL		1.34039e-35	-0.0196137	GSTK1		7.38964e-39	0.00964787	ZFP62		3.21096e-17	-0.335183	NUDT8		3.66822e-14	-0.374921	SNF8		6.94609e-13	-0.531798	MCM3		6.29916e-14	-0.527015
1578	MLX		6.80638e-39	0.141046	AGT		1.39321e-35	-0.0194534	METAP2		7.62419e-39	0.00965691	LNX2		3.21155e-17	-0.334957	ESPN		3.72e-14	-0.374746	MOSPD2		6.96925e-13	-0.531344	FKBP1B		6.34038e-14	-0.526863
1579	PSMD12		6.91609e-39	0.14146	SLC1A5		1.40115e-35	-0.0194494	CDCA7L		7.7758e-39	0.00965894	ZNF598		3.25354e-17	-0.334886	HINFP		3.86633e-14	-0.374647	FOXP1		6.96925e-13	-0.531157	LRPPRC		6.34082e-14	-0.526325
1580	NDUFA13		7.4101e-39	0.141463	CNKSR3		1.54951e-35	-0.0194412	ATIC		7.79384e-39	0.00966563	TTLL12		3.29497e-17	-0.334549	SMPD4		3.93868e-14	-0.374412	ITM2C		6.98787e-13	-0.530475	NUP62		6.39076e-14	-0.525407
1581	MED8		7.76618e-39	0.141497	DCTPP1		1.56636e-35	-0.019396	PROM2		8.11532e-39	0.00966692	GPATCH1		3.29546e-17	-0.334478	GOLGA3		3.99233e-14	-0.374392	MPHOSPH10		7.00636e-13	-0.530194	ACOT11		6.42737e-14	-0.525399
1582	SYVN1		7.82307e-39	0.141604	ARHGEF19		1.65301e-35	-0.0193582	RDH10		8.3727e-39	0.00967121	UAP1		3.35293e-17	-0.334459	GINM1		3.99233e-14	-0.374088	CENPM		7.06069e-13	-0.530163	ZNF687		6.43746e-14	-0.525044
1583	FAM83H		8.49967e-39	0.14204	RPS6KB1		1.6609e-35	-0.0193528	UQCRFS1		8.523e-39	0.00968061	RHBDF2		3.50431e-17	-0.33416	CFB	Prognostic genes	4.09892e-14	-0.374087	RAE1		7.3377e-13	-0.529733	SDHAF3		6.45221e-14	-0.524294
1584	BRD9		9.73849e-39	0.142041	IMP4		1.73505e-35	-0.0193449	PLPP2		9.33784e-39	0.00968275	SPRTN		3.55008e-17	-0.333811	MSN		4.10396e-14	-0.374012	GSTA4		7.55052e-13	-0.529507	CACNB3		6.48339e-14	-0.523876
1585	YBEY		1.0208e-38	0.14215	JOSD1		1.75962e-35	-0.019304	KRAS	Known disease genes	9.34622e-39	0.00968394	MUC16		3.60535e-17	-0.33378	LRRC46		4.13296e-14	-0.373923	ZC3H15		7.65156e-13	-0.529431	ERICH3		6.68247e-14	-0.523408
1586	UBE2H		1.03445e-38	0.142368	BAK1		1.84918e-35	-0.0192927	GLRX5		9.8865e-39	0.00969988	RCE1		3.61341e-17	-0.333687	EHD1		4.28987e-14	-0.373851	SPNS2		7.84075e-13	-0.529363	ILK		6.84417e-14	-0.5234
1587	REXO2		1.19338e-38	0.142406	FLRT3		1.91917e-35	-0.019284	ARSD		1.0086e-38	0.00970616	RASGRF1		3.61641e-17	-0.333504	TOP1MT		4.37996e-14	-0.373829	TLK1		7.89271e-13	-0.52856	CC2D2A		7.35524e-14	-0.523135
1588	CAPSL		1.21878e-38	0.142549	ERV3-1		1.93747e-35	-0.0192779	OTULIN		1.02316e-38	0.00972028	LEO1		3.63208e-17	-0.333492	CDKN2B	Known disease genes	4.38108e-14	-0.373806	DOCK9		7.99724e-13	-0.528507	NCOA4		7.46829e-14	-0.523088
1589	ARCN1		1.23575e-38	0.142728	PITX1		1.94873e-35	-0.0192525	ZMAT2		1.07222e-38	0.00974653	GGCX		3.76161e-17	-0.333394	MACF1		4.38669e-14	-0.373674	TEKT2		8.15858e-13	-0.528461	ADGRF5		7.72482e-14	-0.522295
1590	DKC1		1.31906e-38	0.142822	GPS1		1.95922e-35	-0.0192131	RPN2		1.1174e-38	0.00975263	KDELR1		3.79482e-17	-0.333361	MGAT1		4.49551e-14	-0.373532	CPQ		8.41428e-13	-0.528054	NDUFAF6		8.02388e-14	-0.521006
1591	QPCT		1.41014e-38	0.142894	EIF2S1		2.0977e-35	-0.0191881	GZMB		1.14108e-38	0.00976031	TMEM109		3.81392e-17	-0.33297	RCN1		4.53427e-14	-0.373519	TTC7A		8.49618e-13	-0.528005	ANKRD44		8.24759e-14	-0.520609
1592	DHX36		1.48421e-38	0.143076	PHACTR2		2.15926e-35	-0.0190466	NHSL1		1.22518e-38	0.00976094	NOLC1		3.91383e-17	-0.332743	PTS		4.56923e-14	-0.373238	MRPL30		8.67876e-13	-0.526668	FAM174A	Prognostic genes	8.41202e-14	-0.520196
1593	LMO3		1.51874e-38	0.143128	DPM2		2.22391e-35	-0.0190008	CA9		1.37363e-38	0.00976315	SUCO		3.96068e-17	-0.332214	GALNT6		4.59483e-14	-0.373179	INPP1		8.67876e-13	-0.525861	YKT6		8.6786e-14	-0.520117
1594	RRBP1		1.6813e-38	0.143239	MEA1		2.22933e-35	-0.0189422	FOXJ1		1.75482e-38	0.00976578	FBXO7		4.01765e-17	-0.331953	AMMECR1		4.69665e-14	-0.373097	IFT88		9.15279e-13	-0.525545	RABEP1		8.77799e-14	-0.520069
1595	ZNF12		1.7627e-38	0.143371	NMB		2.26158e-35	-0.0189332	CC2D2A		1.80531e-38	0.00977578	EIF2B4	Known disease genes	4.10367e-17	-0.331832	RNASEH1		4.86444e-14	-0.372688	SYNGR1		9.24798e-13	-0.524915	ST3GAL6		8.93842e-14	-0.520057
1596	PABPC4	Known disease genes	1.78427e-38	0.143593	CXCL2		2.2919e-35	-0.0188774	PPP1R11		1.81945e-38	0.00977627	TMEM92		4.12911e-17	-0.331744	DDX41		5.09649e-14	-0.372616	BARX2		9.45872e-13	-0.524791	C5orf22		9.18227e-14	-0.519137
1597	EIF4E2	Prognostic genes	1.89426e-38	0.143612	FOS		2.32553e-35	-0.0188575	HSPA9		1.89786e-38	0.00978495	MPP6		4.47061e-17	-0.331703	RUVBL1		5.10263e-14	-0.372462	RARRES2		9.58191e-13	-0.523961	GEMIN7		9.46031e-14	-0.518799
1598	BTBD6		1.91562e-38	0.14364	INSIG1		2.68128e-35	-0.0188116	SIPA1L2		1.97691e-38	0.00979449	HKDC1		4.59378e-17	-0.330771	RRM1	Known disease genes	5.10343e-14	-0.372149	OVOL1		9.74954e-13	-0.523665	FTO		9.75312e-14	-0.518581
1599	PIN4		1.91862e-38	0.144017	GOLGA2		2.93199e-35	-0.0187285	ZNF277		2.2653e-38	0.00979548	SGCB		4.65818e-17	-0.330448	FTO		5.2053e-14	-0.371689	CRIP1		9.76242e-13	-0.523579	TBC1D2B		9.82098e-14	-0.518343
1600	PHLDB1		2.03812e-38	0.144162	LTBP1		3.03063e-35	-0.0186975	NT5DC2		2.27692e-38	0.00980295	GPATCH2		4.95148e-17	-0.32994	NFKBIA		5.24043e-14	-0.370644	EED		9.87715e-13	-0.523551	ERICH2		1.00963e-13	-0.518152
1601	GEMIN7		2.26808e-38	0.144182	B4GALT3		3.35043e-35	-0.0186666	SGPL1		2.34125e-38	0.00980829	ARHGEF10		4.98034e-17	-0.328958	IDI1		5.42888e-14	-0.370303	ARFGAP1		9.90151e-13	-0.522969	DDX39A		1.01281e-13	-0.517765
1602	OGFRL1		2.44529e-38	0.144186	SLC38A1		3.44144e-35	-0.0185159	PPCS		2.57009e-38	0.0098091	NFYB		5.09854e-17	-0.328603	ERCC3		5.45293e-14	-0.369503	RUNX2		9.90313e-13	-0.522932	SLBP	Prognostic genes	1.01864e-13	-0.517028
1603	SSH3		2.65718e-38	0.144256	NDUFA2		3.50069e-35	-0.0184474	FRMD8		2.59456e-38	0.00981601	GOT1		5.56159e-17	-0.327933	B3GALNT2		5.49609e-14	-0.369333	IDE		1.00589e-12	-0.522168	EFTUD2		1.02997e-13	-0.516019
1604	HOPX		2.7446e-38	0.144626	CAP1		3.54382e-35	-0.0184267	HES6		2.72615e-38	0.00983167	SFTPD		5.60563e-17	-0.327773	NUP210		5.50735e-14	-0.369198	POLE		1.0468e-12	-0.522017	TMEM45B		1.03681e-13	-0.515833
1605	NDUFA6		2.78678e-38	0.144689	C1orf50		3.6296e-35	-0.0184123	PAPSS1		2.78207e-38	0.00984946	CATSPERD		5.74897e-17	-0.327757	CXCL14		5.56563e-14	-0.368812	ERCC3		1.06846e-12	-0.521819	RINT1		1.04379e-13	-0.51554
1606	NDUFB5		2.8573e-38	0.144932	SMIM15		3.65282e-35	-0.0183995	GLMP		2.93457e-38	0.00985193	SRP54		5.79943e-17	-0.327512	PARP2		5.63036e-14	-0.368786	ANK3		1.07293e-12	-0.520911	MGAT1		1.04587e-13	-0.515438
1607	DHCR24		3.00938e-38	0.145093	KAT2A		3.94729e-35	-0.0183931	DNAJC4		2.9712e-38	0.00985557	BOLA1		5.85011e-17	-0.327477	EIF6		5.63768e-14	-0.368723	CRELD2		1.08432e-12	-0.520481	BHLHE41		1.07581e-13	-0.515304
1608	DRC3		3.08081e-38	0.145216	SDC3		4.64206e-35	-0.0183208	BBOF1		3.11828e-38	0.00986155	ZC3H15		5.89337e-17	-0.327324	DPY19L1		5.68176e-14	-0.36863	GSDMB		1.08516e-12	-0.520456	RANBP10		1.13968e-13	-0.515276
1609	GSTK1		3.20721e-38	0.145303	PSMC2		5.81796e-35	-0.0183068	GLRX3		3.29553e-38	0.00987271	UGGT2		5.9406e-17	-0.327134	GOLPH3L		5.7046e-14	-0.368482	FTSJ1		1.0912e-12	-0.520101	GUCD1		1.16238e-13	-0.515026
1610	ATG12		3.29804e-38	0.145395	HOXB7		5.83362e-35	-0.0182999	MED13		3.30606e-38	0.00987889	MTM1		6.08389e-17	-0.326803	APEX1	Known disease genes	5.77002e-14	-0.36823	ARHGEF19		1.13339e-12	-0.520052	STYXL1		1.16879e-13	-0.514997
1611	PDLIM3		3.39619e-38	0.145399	HLA-DPA1		5.8822e-35	-0.0182875	SEC31A		3.68828e-38	0.00988174	THOP1		6.10843e-17	-0.326685	NUDT1		5.7745e-14	-0.367715	CEBPA		1.13495e-12	-0.519714	SHC1		1.18115e-13	-0.514038
1612	SAP30BP		3.40524e-38	0.145483	STOML2		6.0653e-35	-0.0182352	SNRPF		3.75724e-38	0.00988252	AMZ2		6.463e-17	-0.326593	PDIA3	Prognostic genes	5.78752e-14	-0.367628	NASP		1.13528e-12	-0.519608	FLCN		1.20238e-13	-0.513921
1613	ARHGAP1		3.64701e-38	0.145851	PPP4R2		6.34561e-35	-0.0182255	AFF3		4.5709e-38	0.00988659	YIPF2		6.6201e-17	-0.326436	SPINT2		5.84179e-14	-0.367218	SSR1		1.13902e-12	-0.519395	UNC119		1.22115e-13	-0.513336
1614	C17orf97		4.09921e-38	0.145987	OSCP1	Prognostic genes	7.55664e-35	-0.0182139	GPATCH4		4.83957e-38	0.00989467	JTB		7.00364e-17	-0.326232	TUBA1C	Prognostic genes	5.87987e-14	-0.367212	MEN1		1.14471e-12	-0.518903	HES6		1.22532e-13	-0.513274
1615	CLHC1		4.21571e-38	0.146175	HLA-F		7.69127e-35	-0.0180765	COPE		4.91417e-38	0.00990289	HDLBP		7.17154e-17	-0.326082	RPS6KB2		6.09648e-14	-0.366552	HLA-DPB1		1.16143e-12	-0.518426	MITD1		1.23142e-13	-0.512802
1616	TPRKB		4.3093e-38	0.146644	ATF7IP2		8.19195e-35	-0.01807	EIF4E2	Prognostic genes	4.97837e-38	0.00990524	KCNK1		7.20734e-17	-0.326033	PSME4		6.39312e-14	-0.366356	SLX4IP		1.16572e-12	-0.518213	FA2H		1.26875e-13	-0.512505
1617	MPP6		4.82715e-38	0.146646	YY1		8.71211e-35	-0.0179557	NDUFAF2		5.2059e-38	0.00991073	THOC1		7.26799e-17	-0.325728	TMEM263		6.5106e-14	-0.36571	SLC22A18AS		1.17561e-12	-0.517886	SNF8		1.27325e-13	-0.512412
1618	ARSD		5.10795e-38	0.146661	FOXP2		8.76823e-35	-0.0179385	THOC7		5.2122e-38	0.00992962	ADGRA3		7.26799e-17	-0.325703	UQCC3		6.53413e-14	-0.365689	MGP		1.18521e-12	-0.517452	ZFYVE19		1.2748e-13	-0.51225
1619	SAMHD1		5.16176e-38	0.146705	TM9SF3		9.01517e-35	-0.0179214	PGP		5.29385e-38	0.00993934	NAE1		7.35396e-17	-0.325404	CEP95		6.54467e-14	-0.364971	SNRNP200		1.19357e-12	-0.51734	MRPL36		1.30996e-13	-0.512169
1620	CRB3		5.38611e-38	0.146826	PLA2G4F		9.88782e-35	-0.0178856	SUSD2		5.5057e-38	0.00994088	DGAT1		7.45435e-17	-0.324374	RRP36		6.63763e-14	-0.364783	AKAP11		1.20249e-12	-0.516466	PSMD4		1.32451e-13	-0.51076
1621	TTLL7		5.66177e-38	0.146974	SMARCD2		1.02916e-34	-0.0178822	MARCKS		5.85724e-38	0.00995607	IWS1		7.67535e-17	-0.324362	GLMP		6.71569e-14	-0.364727	GPATCH4		1.20929e-12	-0.51478	GANC		1.32956e-13	-0.510357
1622	DHRS11		6.31401e-38	0.147143	GLRX2		1.08599e-34	-0.0178783	FUS		5.91744e-38	0.00996339	DUSP3		8.11073e-17	-0.324335	GEMIN7		6.75192e-14	-0.364273	FBXW2		1.21614e-12	-0.514709	MSRA		1.33688e-13	-0.50885
1623	EDIL3		6.77937e-38	0.147274	MRPL55		1.20807e-34	-0.0178668	HIF1A		6.01192e-38	0.00996488	THRA		8.16428e-17	-0.324116	DDR1		6.9477e-14	-0.36414	ORC5		1.2391e-12	-0.514368	ARID4A		1.33688e-13	-0.508226
1624	CCT8		6.79992e-38	0.147348	FHL3		1.22275e-34	-0.0178376	ZDHHC18		6.02835e-38	0.00996602	SORT1		8.30534e-17	-0.322959	OAZ3		6.99099e-14	-0.363963	NACC2		1.25992e-12	-0.513937	LSM5		1.3512e-13	-0.508124
1625	MGP		6.96911e-38	0.147382	VAT1		1.22953e-34	-0.0178338	SHC1		7.47637e-38	0.00996666	PAK1IP1		8.3425e-17	-0.322588	RAB34		7.00916e-14	-0.363823	LRP1		1.2855e-12	-0.513812	GTPBP4		1.36519e-13	-0.507501
1626	MRPS25		7.00537e-38	0.147791	SAC3D1		1.33376e-34	-0.0178151	DDR1		7.76038e-38	0.00996714	SRP9		8.3698e-17	-0.322458	NCAPD2		7.0772e-14	-0.363805	C8orf76		1.30612e-12	-0.513568	DHX37		1.37632e-13	-0.507476
1627	H6PD		7.07569e-38	0.147996	HP1BP3		1.34905e-34	-0.0177968	CCDC85B		8.15225e-38	0.00997273	SYNJ2BP		8.37953e-17	-0.322268	MRPL12	Known disease genes	7.09247e-14	-0.363652	EXOSC1		1.31833e-12	-0.512773	PLAU	Prognostic genes	1.44242e-13	-0.507168
1628	NFATC2IP		9.87669e-38	0.148637	GRHPR		1.41511e-34	-0.0177964	HOXB7		8.50527e-38	0.00997464	EIF4G3		8.66622e-17	-0.322124	DNAL1		7.10482e-14	-0.363619	DST		1.31946e-12	-0.512729	PRRC1		1.45106e-13	-0.506197
1629	VPS72		1.23988e-37	0.148705	GNL1		1.43529e-34	-0.0177242	YBEY		8.6151e-38	0.00997717	PIDD1		8.77473e-17	-0.321406	GALE		7.20416e-14	-0.363431	RASSF9		1.33143e-12	-0.511704	MAGEH1		1.46306e-13	-0.505727
1630	IFIT1		1.29223e-37	0.1491	NR2C2AP		1.45871e-34	-0.0176938	SDHC		8.83254e-38	0.00997761	TM9SF4		8.88124e-17	-0.321274	RAB25		7.21619e-14	-0.363409	CREB3L4	Prognostic genes	1.33849e-12	-0.510942	C1orf35		1.48509e-13	-0.505702
1631	ALDOC		1.35713e-37	0.149168	LTBR		1.46538e-34	-0.0176932	QPCT		9.53069e-38	0.00998424	KIF2A		9.00522e-17	-0.320996	DAPK1		7.22705e-14	-0.36275	NFKBIA		1.35496e-12	-0.510638	GGTLC1		1.55709e-13	-0.505588
1632	TPR		1.38059e-37	0.149209	CCDC85B		1.48146e-34	-0.0176582	SHROOM1		9.61674e-38	0.00999359	ZNF260		9.32467e-17	-0.320949	SPICE1		7.747e-14	-0.361476	AGK		1.3609e-12	-0.510373	MTCH2		1.58617e-13	-0.505569
1633	FABP4		1.42323e-37	0.149339	SAMD4A		1.51479e-34	-0.0176548	KRT17		9.95189e-38	0.00999415	DNAJB4		9.46618e-17	-0.319991	POLDIP2		7.8498e-14	-0.360979	ZNF212		1.37201e-12	-0.510242	MRPL17		1.58898e-13	-0.50527
1634	ILF3		1.52456e-37	0.14988	PSMA2		1.69637e-34	-0.0176294	ARL5B		1.0716e-37	0.00999559	ERGIC2		9.55706e-17	-0.319702	TRIOBP		8.03647e-14	-0.360451	TRUB2		1.39698e-12	-0.509861	TLK1		1.59989e-13	-0.504403
1635	GJB1		1.71738e-37	0.150025	PLD3		1.99119e-34	-0.0175691	LUZP1		1.20985e-37	0.0099994	CACNA2D2	Prognostic genes	9.89395e-17	-0.319075	U2SURP	Prognostic genes	8.11096e-14	-0.360358	CD59		1.39938e-12	-0.509709	YIPF1		1.60442e-13	-0.504095
1636	PTPN13		2.02112e-37	0.150028	TMEM183A		2.06589e-34	-0.017554	FERMT1		1.25908e-37	0.010008	RRP1B		9.9503e-17	-0.318639	GPSM2		8.16964e-14	-0.360055	CYSTM1		1.40145e-12	-0.509609	PRKCZ		1.64437e-13	-0.504044
1637	MAGT1		2.15429e-37	0.150511	ZNF90		2.2835e-34	-0.0175272	UHMK1		1.28714e-37	0.010017	BANP		1.01715e-16	-0.318379	ARAP1		8.29995e-14	-0.359976	EGFL7		1.43054e-12	-0.509015	METTL2A		1.67386e-13	-0.503584
1638	SCARB2		2.17236e-37	0.150669	PRPS2		2.30869e-34	-0.0175162	VTI1B		1.32374e-37	0.0100252	COL1A2		1.02873e-16	-0.317963	MRPS5	Known disease genes	8.34251e-14	-0.359561	FASTKD1		1.43973e-12	-0.508695	NFATC4		1.69981e-13	-0.502708
1639	IGFBP3		2.23185e-37	0.150748	SAR1B		2.37061e-34	-0.0174751	TMEM183A		1.38471e-37	0.0100257	RPS6KC1	Known disease genes	1.04491e-16	-0.317816	ENTPD5		8.34272e-14	-0.359552	KPNA3		1.45279e-12	-0.506888	U2SURP	Prognostic genes	1.71178e-13	-0.502382
1640	DYNC1I2	Prognostic genes	2.26288e-37	0.150987	DNAJC7		2.3757e-34	-0.0174499	FUT8		1.43231e-37	0.0100305	TMEM63A		1.05232e-16	-0.317647	PIP5KL1		8.36804e-14	-0.359275	SORD		1.45934e-12	-0.506212	SAR1A		1.73999e-13	-0.502137
1641	MCM3		2.4397e-37	0.151032	SYT15		2.40615e-34	-0.0174455	F12		1.48176e-37	0.0100416	KAZN		1.06977e-16	-0.316878	RXRA		8.44046e-14	-0.359235	XYLT2		1.46418e-12	-0.505951	GUF1		1.74809e-13	-0.502068
1642	EVA1B		2.46204e-37	0.15111	NOTCH2		2.4147e-34	-0.0173291	NINJ1		1.48196e-37	0.0100458	ASCC3		1.07436e-16	-0.316732	SDF2L1		8.51347e-14	-0.359205	PRNP		1.47025e-12	-0.505919	ACAA2		1.75995e-13	-0.501488
1643	SND1		2.61181e-37	0.151216	RNF216		2.4175e-34	-0.0173133	TRIM38		1.51031e-37	0.0100592	HARS2		1.07514e-16	-0.316698	LEO1		8.57766e-14	-0.359088	TOM1L1		1.47387e-12	-0.505903	PSMB4		1.78353e-13	-0.50117
1644	RNF5		2.75143e-37	0.151463	LSM10		2.47916e-34	-0.0170195	HSPD1		1.5928e-37	0.0100699	TIMM23		1.09534e-16	-0.316634	ZNF512B		8.68281e-14	-0.35849	TMEM231		1.48034e-12	-0.505611	ACAD8		1.79e-13	-0.500643
1645	MRPL33		2.75503e-37	0.15149	KLHL23		2.4804e-34	-0.0170075	TSPAN3		1.5928e-37	0.0100772	BPNT1		1.11487e-16	-0.316153	TSFM		8.9501e-14	-0.358198	IWS1		1.48406e-12	-0.505562	DNTTIP1	Prognostic genes	1.79919e-13	-0.499698
1646	HLA-DPB1		2.90381e-37	0.151541	ZNHIT1		2.76004e-34	-0.016923	ITGB1		1.68724e-37	0.01008	SNRNP200		1.12271e-16	-0.315684	SSR1		9.01342e-14	-0.358104	PFDN6		1.51179e-12	-0.505533	ZC3H15		1.80653e-13	-0.499264
1647	RABL2A		2.92398e-37	0.151555	TRIM56		2.78911e-34	-0.0167233	RRBP1		1.77155e-37	0.0100822	NIT2		1.13849e-16	-0.315101	CALR		9.04764e-14	-0.357795	PRPS2		1.54377e-12	-0.505179	TRMT5	Prognostic genes	1.87851e-13	-0.499016
1648	MRPL22		3.07241e-37	0.151595	SH3RF2		3.08931e-34	-0.016668	CERS4		1.84892e-37	0.0100866	PEBP4		1.16652e-16	-0.315	VCAN		9.20206e-14	-0.357739	MRPS10		1.58782e-12	-0.50491	SRP9		1.88618e-13	-0.498838
1649	PNRC1		3.09806e-37	0.152234	MAPK1IP1L		3.1129e-34	-0.0166318	ARHGEF16		2.05598e-37	0.0100929	OSTF1		1.16652e-16	-0.314913	STAP2		9.70079e-14	-0.357701	RBBP5		1.62276e-12	-0.504878	MED8		1.89518e-13	-0.498281
1650	TSGA10		3.20369e-37	0.15234	NFKBIL1		3.19298e-34	-0.0166112	NDUFA6		2.05905e-37	0.0100933	MTG2		1.17163e-16	-0.313953	PABPC4	Known disease genes	9.79966e-14	-0.357528	TUBA1C	Prognostic genes	1.66038e-12	-0.504666	RSPRY1		1.90091e-13	-0.498186
1651	PPIL6		3.307e-37	0.152447	RAC2		3.79925e-34	-0.0165962	EIF4H		2.18202e-37	0.0100972	ATL2		1.18577e-16	-0.313774	TEX14		9.86048e-14	-0.356895	VLDLR		1.67926e-12	-0.504296	C1orf194		1.9025e-13	-0.498143
1652	SWAP70		3.60728e-37	0.152629	TOLLIP		4.20168e-34	-0.0165509	SFTPA2		2.2036e-37	0.0100981	CHORDC1		1.24105e-16	-0.313473	ETS2		9.86521e-14	-0.356604	RBM12B		1.73341e-12	-0.504249	CCDC92		1.9131e-13	-0.497617
1653	GBA		3.68909e-37	0.152794	POMP		4.35261e-34	-0.0164442	SMIM15		2.2437e-37	0.0100982	ENAH		1.26984e-16	-0.313419	XPO4		1.00247e-13	-0.356496	SMYD4		1.73502e-12	-0.502224	WDR38		1.99166e-13	-0.497588
1654	DNAJC4		4.2469e-37	0.15282	PA2G4	Prognostic genes	5.1213e-34	-0.0164404	SLC35F2		2.32855e-37	0.010113	SFTPA2		1.32513e-16	-0.313188	GNG7		1.00622e-13	-0.356216	RWDD1		1.814e-12	-0.501333	COBLL1		2.0001e-13	-0.497528
1655	PDZD11		4.40735e-37	0.152908	LUZP1		5.17851e-34	-0.0164185	RAD1		2.39915e-37	0.0101169	NOL3		1.33708e-16	-0.31314	NOB1		1.01336e-13	-0.356184	APEX1	Known disease genes	1.81669e-12	-0.500924	CHRNB1		2.00622e-13	-0.497272
1656	RUSC1		4.43419e-37	0.152985	MARVELD3		5.18096e-34	-0.01637	SLC35E1		2.45604e-37	0.0101446	FAXC		1.35567e-16	-0.312688	ILK		1.01648e-13	-0.355664	CEP95		1.82337e-12	-0.500835	BEX5		2.04544e-13	-0.497257
1657	ANO9		4.77508e-37	0.153003	PELI1		5.45021e-34	-0.0163292	RAB7A		2.47883e-37	0.0101465	TFF3		1.35705e-16	-0.312535	CHMP4C		1.0276e-13	-0.355141	FOXRED1		1.82533e-12	-0.500167	ERCC3		2.12502e-13	-0.497122
1658	ENKD1		4.79561e-37	0.153241	YTHDF2		5.52809e-34	-0.016229	NOL7		2.5833e-37	0.0101522	SURF4		1.35903e-16	-0.311735	RNF43		1.05786e-13	-0.354522	ZNF687		1.84359e-12	-0.500091	TSFM		2.12833e-13	-0.496898
1659	CCDC90B		4.85252e-37	0.153348	PRRC1		5.59301e-34	-0.016222	SLCO2A1		2.69598e-37	0.0101618	RPP21		1.38067e-16	-0.311251	LSM5		1.07197e-13	-0.354185	SLBP	Prognostic genes	1.92113e-12	-0.49997	SPATA18	Prognostic genes	2.15814e-13	-0.496208
1660	GNA13		5.41386e-37	0.153386	LGALS4		5.98774e-34	-0.0161557	SRP19		2.7768e-37	0.010166	MEX3D		1.38093e-16	-0.310913	CFAP53		1.07986e-13	-0.353916	HDLBP		1.93514e-12	-0.49935	LRP1		2.18171e-13	-0.496192
1661	HMBS		5.8718e-37	0.153441	AP2M1	Prognostic genes	6.00061e-34	-0.0161296	RUSC1		2.89586e-37	0.0101693	C2orf68		1.40108e-16	-0.310907	RCE1		1.09264e-13	-0.353773	E2F5		1.94806e-12	-0.499205	PABPC4	Known disease genes	2.19562e-13	-0.496098
1662	MYL6B		6.73866e-37	0.153506	MBOAT7		6.09617e-34	-0.0159687	NDUFB3		3.29138e-37	0.0101817	ALDH2		1.41858e-16	-0.310896	NAA10	Known disease genes	1.11135e-13	-0.353611	INTS4		1.95229e-12	-0.499184	FBXL6		2.22184e-13	-0.495477
1663	USE1		7.28263e-37	0.153698	IKZF3		6.15914e-34	-0.0159633	GPS1		3.52502e-37	0.0101897	NCF1		1.49251e-16	-0.310556	USP39		1.11464e-13	-0.35295	MAN1C1		2.03312e-12	-0.498622	SEC24A		2.22505e-13	-0.495368
1664	GALNT14		7.40264e-37	0.154026	CORO2A		6.22103e-34	-0.0159349	ETV5		3.62734e-37	0.0101926	METTL17		1.52399e-16	-0.31038	EFNA5		1.12843e-13	-0.352804	TAF2		2.24729e-12	-0.497931	HNRNPL		2.26129e-13	-0.495344
1665	IRF1		7.55128e-37	0.154245	SLC38A10		6.29446e-34	-0.0159046	RAB11A	Prognostic genes	3.67048e-37	0.0102018	SSBP1		1.53241e-16	-0.310265	FOXA1		1.20141e-13	-0.352192	JUNB	Known disease genes	2.25041e-12	-0.49759	PARVA		2.28915e-13	-0.494411
1666	MT-ND4L		7.64642e-37	0.154385	PRRC2A		6.35739e-34	-0.015899	HES4		3.68735e-37	0.0102018	LMBRD1		1.54852e-16	-0.310156	JMJD4		1.23603e-13	-0.35188	ING3		2.26048e-12	-0.496938	SLC7A11		2.31781e-13	-0.49382
1667	SPATC1L		7.74894e-37	0.154407	PAK1	Prognostic genes	6.57741e-34	-0.0158717	ISYNA1		3.71394e-37	0.0102128	SLC20A1		1.55508e-16	-0.309682	DOCK6		1.24061e-13	-0.350767	RRAD		2.2766e-12	-0.496112	TRAF7		2.367e-13	-0.493663
1668	TRAPPC6A		7.85076e-37	0.154455	JUN		6.71156e-34	-0.0157986	MVP		3.73209e-37	0.0102209	MIF		1.59104e-16	-0.30944	CHST15		1.24553e-13	-0.350528	C16orf87		2.28876e-12	-0.496112	IRF7		2.40715e-13	-0.493362
1669	SFXN1	Known disease genes	8.11793e-37	0.154502	CBLC		6.9782e-34	-0.0157915	SH3GLB1		3.86326e-37	0.0102261	LRRC42		1.59104e-16	-0.309424	SLC16A9		1.25732e-13	-0.350404	CHPF		2.29738e-12	-0.496107	CASP2		2.42615e-13	-0.492971
1670	SMARCA1		8.23576e-37	0.154632	DNAJA4		7.73517e-34	-0.0157754	VPS72		4.41154e-37	0.0102284	SCGB1A1		1.6313e-16	-0.309102	ALKBH6		1.25926e-13	-0.350052	GTPBP4		2.3099e-12	-0.495973	CHPT1		2.48905e-13	-0.492914
1671	WDR83OS		8.38499e-37	0.154754	TMEM165		8.44542e-34	-0.0157571	HDAC2		4.96036e-37	0.0102303	GEMIN6		1.63484e-16	-0.308906	CLDN10		1.26354e-13	-0.349845	SPATA13		2.35487e-12	-0.495781	PDCD11		2.49455e-13	-0.492413
1672	CKS1B		8.76938e-37	0.154897	GHDC		8.69404e-34	-0.0157371	SFXN1	Known disease genes	5.37925e-37	0.0102341	SIGMAR1		1.66234e-16	-0.308589	PAQR5		1.27026e-13	-0.34935	C2		2.36171e-12	-0.495408	EFEMP2		2.53495e-13	-0.492221
1673	IL1RAP		9.42565e-37	0.155177	PLOD1		9.02273e-34	-0.0157211	NCOA7		5.43925e-37	0.0102361	ZNF12		1.67997e-16	-0.308113	CTPS2		1.30629e-13	-0.349238	MRPL37		2.37131e-12	-0.494916	MGP		2.61933e-13	-0.492172
1674	ATAD2		9.81587e-37	0.155341	ANOS1		9.22325e-34	-0.0156841	VAT1		5.45541e-37	0.0102567	CD81		1.70029e-16	-0.308079	ADAM15		1.31525e-13	-0.348777	MED8		2.42255e-12	-0.494801	DSG2		2.62807e-13	-0.492158
1675	SLFN5		1.06581e-36	0.15565	PRAF2		9.44692e-34	-0.0156341	PRRC1		5.63539e-37	0.010262	VDAC1		1.71134e-16	-0.307708	MTERF3		1.33805e-13	-0.348744	DCUN1D5		2.43861e-12	-0.494668	EXOSC5		2.65176e-13	-0.492087
1676	ARC		1.18737e-36	0.155787	TRAPPC6A		9.56286e-34	-0.0155947	LTBR		5.6805e-37	0.0102624	SMYD3		1.72755e-16	-0.306854	WWP2		1.34898e-13	-0.347695	FAM120B		2.46544e-12	-0.494653	TMEM186		2.65298e-13	-0.491595
1677	VCAN		1.19689e-36	0.155799	GOLPH3		9.57514e-34	-0.0155848	SNRPC		5.79326e-37	0.010272	SEL1L3		1.7307e-16	-0.306677	LY6D		1.38197e-13	-0.346891	SCD		2.5399e-12	-0.493665	APC	Known disease genes	2.68092e-13	-0.491441
1678	NMNAT2		1.33096e-36	0.156258	TIMM17A		9.94234e-34	-0.0155413	DGAT1		7.16747e-37	0.0102953	ZNF514		1.7831e-16	-0.306564	SUPT7L		1.39782e-13	-0.346796	NOLC1		2.56142e-12	-0.493593	MRPL37		2.71165e-13	-0.491422
1679	MAP7D2		1.33921e-36	0.156288	RARA		1.00552e-33	-0.0155394	PCGF2		7.26051e-37	0.0103033	MOB3C		1.78621e-16	-0.30639	EIF2B4	Known disease genes	1.44923e-13	-0.346772	MCCC2		2.56432e-12	-0.493451	SRGAP2B		2.71396e-13	-0.48992
1680	ZNF750		1.40507e-36	0.156339	NEURL1B		1.02535e-33	-0.0155282	PRKCSH		7.27571e-37	0.0103043	TPSB2		1.84337e-16	-0.306099	TINF2		1.46663e-13	-0.346128	SLFN11		2.58588e-12	-0.493032	KLF11		2.86678e-13	-0.489872
1681	ENG		1.41216e-36	0.156346	MSN		1.02672e-33	-0.0155227	MAPK14	Known disease genes	7.3246e-37	0.0103061	STAU2		1.87812e-16	-0.305115	AHCTF1		1.46936e-13	-0.346075	DENND6A		2.60782e-12	-0.491967	WDR55		2.86834e-13	-0.489553
1682	FKBP4		1.42479e-36	0.156453	LYRM4		1.04857e-33	-0.0154759	PFN1		7.33216e-37	0.0103112	GMCL1		1.95317e-16	-0.304792	AXL		1.46936e-13	-0.345917	SERPINB6		2.6761e-12	-0.491839	CERS6		2.94003e-13	-0.489426
1683	PLEKHB1		1.44664e-36	0.156543	GPSM2		1.06396e-33	-0.0153619	RNF145		8.19151e-37	0.0103227	HIP1R		1.95797e-16	-0.304743	PTK6		1.48301e-13	-0.345082	CRTC3		2.7532e-12	-0.491356	ADAR		3.12757e-13	-0.488893
1684	RNF19A		1.4737e-36	0.156738	RHBDF2		1.06964e-33	-0.0153554	RAP2B	Prognostic genes	9.48989e-37	0.0103375	KRT17		2.01445e-16	-0.304411	MRPS34		1.49953e-13	-0.344894	ZBTB8A		2.76954e-12	-0.490413	HLA-DPB1		3.13902e-13	-0.488815
1685	SLC35F2		1.517e-36	0.15695	NETO2		1.0891e-33	-0.0151799	RRP36		9.97446e-37	0.010351	EIF1AD		2.03619e-16	-0.303501	TM9SF4		1.53453e-13	-0.34483	EVL		2.84168e-12	-0.490286	S100PBP		3.16643e-13	-0.488588
1686	PKN1		1.61877e-36	0.157146	EDIL3		1.11736e-33	-0.0151677	CRB3		1.06046e-36	0.0103534	EMB		2.05171e-16	-0.303177	MTCH2		1.54103e-13	-0.344764	SURF4		2.8453e-12	-0.490226	SATB1	Known disease genes	3.29736e-13	-0.488187
1687	TIPRL		1.61877e-36	0.15756	EXOSC5		1.14064e-33	-0.0151546	IRS1		1.06266e-36	0.01036	BRD9		2.07648e-16	-0.302872	BICD2		1.58156e-13	-0.344684	KCNN4		2.85941e-12	-0.490219	MTFP1		3.31532e-13	-0.487359
1688	RFC4	Known disease genes	1.74149e-36	0.157935	RRP1		1.18326e-33	-0.0151259	ATRAID	Prognostic genes	1.08226e-36	0.0103604	DYRK2		2.19807e-16	-0.302698	APIP		1.58214e-13	-0.344327	MRPL24		2.97097e-12	-0.489755	SNTN		3.57746e-13	-0.486809
1689	HES1		1.82567e-36	0.15813	SNX18		1.20175e-33	-0.0151149	HM13		1.12997e-36	0.0103714	CD24		2.22128e-16	-0.302668	IWS1		1.59334e-13	-0.343513	PGM1		2.97375e-12	-0.489422	IWS1		3.6214e-13	-0.485797
1690	ENC1		1.83717e-36	0.158183	SPATA17		1.22123e-33	-0.0150863	WDR46		1.13832e-36	0.0104085	MAD2L2		2.2366e-16	-0.301979	NOLC1		1.61761e-13	-0.343267	CPEB3		3.0095e-12	-0.488947	DBN1		3.65153e-13	-0.485176
1691	ADRM1		2.03174e-36	0.158274	COLEC12		1.22686e-33	-0.0150712	PAK1	Prognostic genes	1.29638e-36	0.0104165	NT5DC1		2.2599e-16	-0.301789	PRPS2		1.62267e-13	-0.343221	DHRS11		3.03017e-12	-0.488727	DST		3.67296e-13	-0.485072
1692	MATN2		2.14198e-36	0.15833	RINL		1.25224e-33	-0.0150597	NAT9		1.34371e-36	0.0104214	STARD7		2.2869e-16	-0.301666	CADM1		1.65571e-13	-0.343201	MRPL53		3.03437e-12	-0.487883	SPSB1		3.68441e-13	-0.484422
1693	IPO9		2.18935e-36	0.158404	ACO1		1.28542e-33	-0.0150596	NQO1		1.3645e-36	0.0104304	FOS		2.32006e-16	-0.301476	TRMT2A		1.67399e-13	-0.342645	ZBED3		3.0425e-12	-0.487726	UBE2E2		3.7362e-13	-0.483704
1694	SLC35B2		2.36627e-36	0.158461	HM13		1.38639e-33	-0.0149865	DDIT4		1.4895e-36	0.010433	EBNA1BP2		2.33798e-16	-0.301442	SDHAF3		1.68032e-13	-0.342556	UGDH		3.10971e-12	-0.486181	HIPK3		3.74966e-13	-0.483205
1695	UBE2Z	Prognostic genes	2.56411e-36	0.158628	PLP2		1.39457e-33	-0.0149376	SVIL		1.56022e-36	0.0104436	TMEM220		2.36371e-16	-0.30101	RFC2		1.69829e-13	-0.342192	COBL		3.12104e-12	-0.485694	GOLGA3		3.77146e-13	-0.482318
1696	MEF2C		2.65874e-36	0.158942	ISG20L2		1.51454e-33	-0.0149347	PRRC2A		1.87711e-36	0.0104447	HGS		2.40331e-16	-0.30084	TARBP1		1.70148e-13	-0.342063	CLDN4		3.15446e-12	-0.485659	ARFGAP1		3.94289e-13	-0.481069
1697	MTCH2		2.76685e-36	0.158981	CHST2		1.56067e-33	-0.0148607	SPRR2D		2.07183e-36	0.0104499	NDUFS2		2.42566e-16	-0.300811	C22orf39		1.70665e-13	-0.341927	WFDC3		3.1621e-12	-0.485243	ESPN		4.07069e-13	-0.480745
1698	ITGB8		2.96954e-36	0.159005	KDR	Known disease genes	1.58657e-33	-0.0148484	SAT2		2.10508e-36	0.0104689	ZNF26		2.51372e-16	-0.300416	PLOD1		1.71013e-13	-0.341715	CTSH		3.1737e-12	-0.483335	ATP13A4		4.14245e-13	-0.480517
1699	BCKDK		3.04835e-36	0.159282	KLHDC8B		1.59311e-33	-0.0148439	ATF7IP2		2.16835e-36	0.010469	UTP4		2.57243e-16	-0.300304	NEDD4L		1.71774e-13	-0.341658	FASTKD3		3.2099e-12	-0.482801	RPN2		4.3447e-13	-0.48051
1700	RAB10		3.2184e-36	0.159857	PTK6		1.60324e-33	-0.0147097	PDP1		2.35506e-36	0.0104694	ARHGEF37		2.57559e-16	-0.299866	HSP90AB1		1.72138e-13	-0.341085	DBN1		3.25948e-12	-0.482666	NOMO1		4.45925e-13	-0.480326
1701	U2SURP	Prognostic genes	3.2184e-36	0.160149	PRRX2		1.64724e-33	-0.0146855	PHACTR4		2.5466e-36	0.010481	PCGF1		2.62178e-16	-0.299841	TMED9		1.75887e-13	-0.341047	RASSF5		3.27426e-12	-0.482281	WDR3		4.59044e-13	-0.480259
1702	GON4L		3.26383e-36	0.160157	MLX		1.81589e-33	-0.0146677	SPAG4		2.55907e-36	0.0104823	ZNF544		2.63767e-16	-0.299826	TELO2		1.77657e-13	-0.340698	PDCD5		3.28061e-12	-0.481981	COL4A3		4.65411e-13	-0.479962
1703	FMO5		3.33108e-36	0.1602	PGP		1.82235e-33	-0.0146147	KRT23		2.76846e-36	0.0104891	BRAT1		2.70975e-16	-0.299297	CHML		1.78579e-13	-0.340586	RUVBL1		3.39699e-12	-0.481623	LRRC4		4.70441e-13	-0.478773
1704	ERGIC2		3.38798e-36	0.160357	PSD3		2.01069e-33	-0.014605	LRP10		2.92633e-36	0.0104973	IL11RA		2.75318e-16	-0.298716	IRF3		1.78853e-13	-0.340275	ABLIM1	Prognostic genes	3.44343e-12	-0.480425	CALCOCO2		4.72578e-13	-0.478419
1705	RBPMS		3.63656e-36	0.160436	SLC40A1		2.06874e-33	-0.0145912	HYOU1		2.99183e-36	0.0105147	TIMM9		2.81746e-16	-0.298671	TBC1D2		1.81066e-13	-0.340208	TBC1D1		3.46341e-12	-0.480187	HLTF		4.80709e-13	-0.477805
1706	CTXN1		3.67971e-36	0.16101	PSMC5		2.14068e-33	-0.0145572	LAMP2	Prognostic genes	2.99393e-36	0.01052	TYW5		2.82811e-16	-0.298669	ANXA6		1.84528e-13	-0.340179	MAN1A1		3.48772e-12	-0.479947	JUNB	Known disease genes	4.81895e-13	-0.477538
1707	SFPQ		3.71775e-36	0.161229	STEAP1		2.17356e-33	-0.0145455	WDR83OS		3.23001e-36	0.0105324	ITGAV		2.83212e-16	-0.298432	RAD51D		1.90496e-13	-0.340174	SLC35F5		3.49638e-12	-0.479785	PLXNA3	Prognostic genes	4.99629e-13	-0.476764
1708	TFDP1		3.85504e-36	0.16137	GBA		2.19321e-33	-0.0145286	GTF2I		3.24448e-36	0.0105373	DCPS		2.86645e-16	-0.298195	CDS2		1.95213e-13	-0.3399	HLA-DRB1		3.51054e-12	-0.479683	TOPBP1		5.01757e-13	-0.476055
1709	NCEH1		4.04372e-36	0.161399	CDK5RAP3		2.20832e-33	-0.0145132	UBE2A		3.2479e-36	0.0105472	TDRD3		2.88602e-16	-0.298192	PPP2R5A		1.98082e-13	-0.339207	CCDC181		3.52765e-12	-0.479493	TMED4		5.02144e-13	-0.476047
1710	BBS4		4.58677e-36	0.161525	PHLDB1		2.24346e-33	-0.0144793	MVB12A		3.28304e-36	0.0105539	EIF1B		2.90461e-16	-0.298056	SLC16A3		2.0361e-13	-0.338849	PHF6		3.55811e-12	-0.479478	CD59		5.23576e-13	-0.475755
1711	POM121		4.93995e-36	0.161694	IFIT1		2.26024e-33	-0.0143944	TM9SF3		3.3161e-36	0.0105666	METTL5		2.96961e-16	-0.297315	XPA		2.07059e-13	-0.33873	USP54		3.55811e-12	-0.479312	CACHD1		5.24913e-13	-0.475199
1712	HAGHL		5.3864e-36	0.161801	NET1		2.38818e-33	-0.014353	PPP1R18		3.34991e-36	0.0105698	PRKRIP1		2.98127e-16	-0.296792	MORF4L2		2.10011e-13	-0.338573	ZBTB21		3.58535e-12	-0.479067	NFKBIA		5.26018e-13	-0.475185
1713	HM13		5.47111e-36	0.16182	MFN2		2.55702e-33	-0.0142826	ZCCHC17		3.6633e-36	0.0105749	PAAF1		3.03741e-16	-0.29645	ZC3H15		2.10761e-13	-0.337638	MRPL17		3.63478e-12	-0.478717	SEC61G		5.31363e-13	-0.475103
1714	SUZ12		5.57858e-36	0.161847	SCG5		3.07073e-33	-0.0141948	BFAR	Prognostic genes	3.70581e-36	0.0105899	ISYNA1		3.08203e-16	-0.296318	ZMYND10		2.13505e-13	-0.337526	RSPRY1		3.64735e-12	-0.478655	MUC3A		5.43768e-13	-0.475084
1715	PSMC6		5.93342e-36	0.161946	MDH2		3.21666e-33	-0.0141241	GALNT11		4.20994e-36	0.0105986	AK2		3.11569e-16	-0.29619	ACSL1		2.1376e-13	-0.337376	RGS16		3.72046e-12	-0.478646	ITM2C		5.46935e-13	-0.474928
1716	GALNT3		6.17642e-36	0.16196	MTMR3		3.22964e-33	-0.0141165	PSMC3		4.21351e-36	0.0106027	RBBP4		3.1262e-16	-0.296121	UHMK1		2.19521e-13	-0.337213	METTL23		3.7395e-12	-0.47821	MPP5		5.72678e-13	-0.474825
1717	TSC22D4		6.81129e-36	0.162043	ARRDC2		3.26485e-33	-0.01388	SYAP1		4.38134e-36	0.0106043	SF3B6		3.28504e-16	-0.295749	HDLBP		2.24474e-13	-0.336618	CYTH1		3.7395e-12	-0.478086	FAXDC2		5.78268e-13	-0.474481
1718	APPL2		6.92638e-36	0.162121	CUEDC1		3.34953e-33	-0.0138736	GALK1		4.53929e-36	0.0106179	C6orf136		3.31134e-16	-0.295337	HMGCS1		2.28835e-13	-0.335965	SEC24A		3.87865e-12	-0.477783	ERI2		5.8017e-13	-0.47443
1719	HPS3		7.04694e-36	0.162141	PRKCSH		3.36605e-33	-0.0138644	SPSB1		4.62321e-36	0.0106212	NPAS2		3.41895e-16	-0.295275	SLC25A22		2.32759e-13	-0.33584	DDX39A		3.91687e-12	-0.477097	CFTR		6.00889e-13	-0.474377
1720	PTP4A1		8.07167e-36	0.162504	TMPRSS13		3.36878e-33	-0.0137318	ATP6V0A1		5.34915e-36	0.0106215	EDRF1		3.43371e-16	-0.295211	OXLD1		2.36082e-13	-0.335807	RBMS1		3.91687e-12	-0.476339	PPM1G		6.01456e-13	-0.474226
1721	PAIP1		8.68816e-36	0.162591	PSMD13		3.40276e-33	-0.013708	AHNAK2		5.91145e-36	0.0106407	GAB2		3.52117e-16	-0.294786	ZNF281		2.38418e-13	-0.335751	TRMO		3.95065e-12	-0.475953	DMD		6.01843e-13	-0.473955
1722	TMEM183A		8.76043e-36	0.162722	DCTN5		3.42233e-33	-0.0137055	STARD3		6.74185e-36	0.0106517	ATR	Known disease genes	3.58911e-16	-0.294393	POLD2		2.38882e-13	-0.33548	CRABP2		4.00409e-12	-0.475937	SAXO2		6.08644e-13	-0.473673
1723	RAPH1		9.65096e-36	0.162727	FAM120A		3.4257e-33	-0.0136961	MAFK		6.88875e-36	0.0106604	B3GAT3		3.6276e-16	-0.294167	KDELR1		2.39057e-13	-0.335367	EHMT2		4.02078e-12	-0.475936	SYDE2		6.19565e-13	-0.473291
1724	ARF4		1.06123e-35	0.162799	CRIPT		3.55304e-33	-0.0136529	SLC39A8		7.68095e-36	0.0106626	RHPN2		3.63446e-16	-0.294017	AMZ2		2.42325e-13	-0.33498	NDE1		4.09452e-12	-0.475224	MORF4L2		6.30422e-13	-0.473285
1725	CYB5D1	Prognostic genes	1.1065e-35	0.163104	MRPL4		3.59322e-33	-0.0136263	CWC15		7.89382e-36	0.0106648	SLC35B3		3.67615e-16	-0.293139	PAIP1		2.42894e-13	-0.334624	RSU1		4.11804e-12	-0.475109	CLPTM1L	Known disease genes / Prognostic genes	6.43485e-13	-0.472897
1726	DAD1		1.12159e-35	0.163138	SLC35E1		3.61492e-33	-0.013601	CORO1B		8.88279e-36	0.0106683	PXDC1		3.78365e-16	-0.292855	UAP1		2.4456e-13	-0.33407	TRAF5		4.1549e-12	-0.47426	TGFB2		6.51056e-13	-0.472546
1727	STK24		1.12291e-35	0.163239	QPCT		3.76387e-33	-0.0135919	MANF		8.98991e-36	0.0106725	RPL22L1		3.85316e-16	-0.292729	SAC3D1		2.44923e-13	-0.333837	PIK3R3		4.1549e-12	-0.473888	RAB32		6.52087e-13	-0.472155
1728	TBRG4		1.13325e-35	0.16338	VASP		3.80625e-33	-0.0135803	BATF		9.57395e-36	0.0106833	PRMT5		3.97429e-16	-0.292017	ETV6		2.4588e-13	-0.333554	ATP6V0D1		4.16039e-12	-0.473812	FAM189B		6.55853e-13	-0.471634
1729	CLDN3		1.21358e-35	0.163406	AP2S1	Prognostic genes	4.00836e-33	-0.0135612	SRGAP3		1.02488e-35	0.0106881	CELF2		4.13525e-16	-0.291955	SPRTN		2.47391e-13	-0.333156	SNAP23		4.16141e-12	-0.473706	DOCK9		6.64295e-13	-0.471504
1730	SNRPF		1.2963e-35	0.163413	PYCARD		4.48997e-33	-0.0135221	ERV3-1		1.11542e-35	0.0106982	TOR3A		4.28615e-16	-0.291907	AKIRIN2		2.50196e-13	-0.333149	MESP1		4.17703e-12	-0.473343	EHMT2		6.86384e-13	-0.471252
1731	PRKDC	Known disease genes	1.43754e-35	0.163479	CDK16		4.53661e-33	-0.0135164	PDZD11		1.21985e-35	0.0107016	SEC31A		4.33102e-16	-0.2912	EXOSC4		2.50508e-13	-0.332509	NR0B2		4.19187e-12	-0.473008	HLA-DRB1		6.87571e-13	-0.470878
1732	MAF1		1.45136e-35	0.163488	LRRC20		4.58976e-33	-0.013512	ST6GALNAC2		1.25715e-35	0.0107023	BRPF3		4.35145e-16	-0.290955	SPATA20		2.51695e-13	-0.332202	PRR3		4.49792e-12	-0.472954	MCCC2		7.14496e-13	-0.470324
1733	RAB1A		1.47097e-35	0.163498	MAP3K5		4.74364e-33	-0.0135093	CLTA		1.30823e-35	0.0107026	POLR3K		4.45449e-16	-0.28757	MTPAP		2.53556e-13	-0.33207	MPHOSPH8		4.5973e-12	-0.472463	XPC	Known disease genes	7.15767e-13	-0.470178
1734	C1orf50		1.60994e-35	0.163522	BAG3		4.80324e-33	-0.013493	SRSF11		1.34931e-35	0.0107183	BMP2		4.57272e-16	-0.287371	CPSF4		2.67704e-13	-0.331887	FKBP15		4.61665e-12	-0.472123	RPGRIP1L		7.20761e-13	-0.469406
1735	DDX56		1.72052e-35	0.16362	PQBP1		5.11588e-33	-0.0134855	FAM89A		1.39984e-35	0.0107263	NUP205		4.58865e-16	-0.287203	BMF		2.73369e-13	-0.331259	PTGES		4.6971e-12	-0.472033	LAGE3		7.34083e-13	-0.469342
1736	LRRC6		1.8523e-35	0.163756	SPTB		6.24546e-33	-0.0134739	RTN4RL2		1.40603e-35	0.0107268	PMS1		4.69048e-16	-0.28718	GALNT2		2.79932e-13	-0.331228	PDIA3	Prognostic genes	4.70179e-12	-0.471698	SLC35F5		7.46958e-13	-0.469331
1737	TFAM		1.90301e-35	0.164201	MRTO4		6.48294e-33	-0.0134562	FKBP5		1.40603e-35	0.0107351	ITM2B		4.70472e-16	-0.286744	SURF4		2.80897e-13	-0.33067	CD274	Prognostic genes	4.78867e-12	-0.471315	DHX57		7.49738e-13	-0.468681
1738	CAMK2G		2.02639e-35	0.164224	HSD3B7		6.88558e-33	-0.0133382	CCDC90B		1.44018e-35	0.0107442	ABCE1		4.77663e-16	-0.286722	SNRNP200		2.81267e-13	-0.328565	ADAM28		4.85556e-12	-0.471018	LRIF1		7.58605e-13	-0.467931
1739	CHMP2B		2.29071e-35	0.164375	PNMA2		6.89194e-33	-0.0132814	CHMP2B		1.48974e-35	0.010746	TEF		4.78372e-16	-0.286193	SNRPC		2.83593e-13	-0.328303	YIPF1		4.87067e-12	-0.470593	KRT8		7.74725e-13	-0.467929
1740	GRHPR		2.33331e-35	0.164476	CLDN1		7.04804e-33	-0.0131857	PRR13		1.53718e-35	0.010751	AUP1		4.78473e-16	-0.285786	S100A2		2.86731e-13	-0.327882	CASP2		4.88617e-12	-0.470518	ZDHHC2		7.87851e-13	-0.467816
1741	SHISA3		2.41833e-35	0.164487	SRRD		7.55062e-33	-0.0131787	SLC39A1		1.6051e-35	0.0107524	MMP14		4.80135e-16	-0.285603	AHNAK2		2.93499e-13	-0.327684	BACE1		4.88787e-12	-0.470269	SLC20A1		7.90242e-13	-0.467752
1742	B4GALT1		2.44015e-35	0.164608	WDR91		7.9997e-33	-0.0131678	DNAJC7		1.61304e-35	0.0107552	CLSTN3		4.85047e-16	-0.285253	ZNF598		2.96106e-13	-0.327355	CCZ1B		4.91553e-12	-0.470264	TMEM216		7.96518e-13	-0.467716
1743	UHMK1		2.72254e-35	0.1647	EHD2		8.3442e-33	-0.0131238	DYNC1I2	Prognostic genes	1.72279e-35	0.010773	MDH2		4.86508e-16	-0.285165	FBXO45		2.98277e-13	-0.327174	TSC22D3		5.09789e-12	-0.469562	SUPT7L		8.00535e-13	-0.467695
1744	COX14		2.77153e-35	0.164764	NOSIP		8.56466e-33	-0.0131078	PALMD		2.16915e-35	0.0107773	PERP		4.88689e-16	-0.284927	TSC22D1		3.0077e-13	-0.326911	ANKRD39		5.17577e-12	-0.469481	CTSH		8.12513e-13	-0.467435
1745	DNAH7		3.36893e-35	0.164864	CDYL		9.15132e-33	-0.0130471	SNAPIN		2.3191e-35	0.010786	CYP4B1		4.93781e-16	-0.28484	PJA2		3.01336e-13	-0.326873	ID1		5.19669e-12	-0.469158	SCD		8.18163e-13	-0.467429
1746	SEC31A		3.37076e-35	0.164902	UBAC2		9.26023e-33	-0.013031	NFIC		2.32071e-35	0.0107878	CDKL5		4.97307e-16	-0.284674	RRP1B		3.02649e-13	-0.326351	GFOD2		5.21999e-12	-0.469129	UGDH		8.27418e-13	-0.467238
1747	RSPH3	Prognostic genes	3.76729e-35	0.164962	MRGBP		9.30516e-33	-0.012922	GALNT7		2.41524e-35	0.0107923	CSE1L		5.05508e-16	-0.284081	S100PBP		3.04581e-13	-0.325583	ABCF2		5.25818e-12	-0.469127	BMF		8.40885e-13	-0.467237
1748	COX6C		4.02616e-35	0.165003	UBE2M		9.34883e-33	-0.0129173	SLC38A10		2.41524e-35	0.0107979	MAGI1		5.08104e-16	-0.284005	GMPS		3.04659e-13	-0.325578	PIGC		5.28292e-12	-0.469041	RIC3		8.481e-13	-0.467055
1749	EIF2S1		4.13172e-35	0.165149	NUDT8		9.94278e-33	-0.0129007	SNRPD1		2.49957e-35	0.010821	SWI5		5.19826e-16	-0.283455	FGD6		3.0667e-13	-0.325539	SF3B3		5.39038e-12	-0.468851	GPATCH1		8.62585e-13	-0.466531
1750	VEZT		4.47395e-35	0.165181	FCGRT		1.00336e-32	-0.0127922	ITPR3		2.61374e-35	0.010823	AKAP13		5.34663e-16	-0.283452	CHI3L2		3.07782e-13	-0.325444	CCDC34		5.40189e-12	-0.468707	TMCO1		8.62723e-13	-0.466367
1751	USP53		4.68478e-35	0.165241	RHOB		1.09073e-32	-0.0127335	KRTCAP3		2.62479e-35	0.0108259	DHX57		5.57095e-16	-0.282573	TGFBR3L		3.14812e-13	-0.325383	PDCD11		5.48687e-12	-0.468549	COL17A1		8.64598e-13	-0.466071
1752	MIIP		4.89269e-35	0.165313	SCEL		1.11429e-32	-0.0125671	HNRNPUL1		2.82632e-35	0.0108263	INSIG1		5.5986e-16	-0.281894	CHURC1		3.21543e-13	-0.325196	UHMK1		5.53361e-12	-0.467773	ANO9		8.66393e-13	-0.46576
1753	STMND1		4.89789e-35	0.165341	TMEM259		1.14387e-32	-0.0124437	FTO		2.84259e-35	0.0108444	RNF38		5.6568e-16	-0.281887	EFNB2		3.36731e-13	-0.325155	SUPT7L		5.71103e-12	-0.467628	IMP4		8.84425e-13	-0.464601
1754	MCM6		4.9131e-35	0.165553	NOL11		1.16847e-32	-0.0124427	CCDC107		3.09383e-35	0.0108475	SF3B3		5.76433e-16	-0.281648	GPATCH1		3.54726e-13	-0.324775	MROH6		5.78962e-12	-0.466331	MOAP1	Prognostic genes	8.84662e-13	-0.464459
1755	FBXW11		5.02326e-35	0.165583	FAM20C		1.27595e-32	-0.0124427	PRPS2		3.20792e-35	0.0108476	ZNF121		5.85986e-16	-0.281198	HLA-DRA		3.54726e-13	-0.323593	NCAPD3		5.83162e-12	-0.466201	NASP		8.84826e-13	-0.464283
1756	TMEM132A		5.72376e-35	0.165659	SNRPD2		1.33185e-32	-0.0124237	LSM10		3.22052e-35	0.0108513	ETV5		6.05151e-16	-0.281013	NASP		3.58847e-13	-0.323239	PNPT1		6.02719e-12	-0.465825	ASPHD1		8.85581e-13	-0.46421
1757	DNAJC19		6.32297e-35	0.165682	INPP1		1.64012e-32	-0.0124167	SUMO1		3.25275e-35	0.0108658	GRN		6.10405e-16	-0.280627	GORASP1		3.62651e-13	-0.322914	SLC48A1	Prognostic genes	6.02799e-12	-0.465792	ABCF2		8.92639e-13	-0.464164
1758	MAN1B1		6.4436e-35	0.165804	RAPGEF5		1.71378e-32	-0.01237	STOX1		3.57737e-35	0.0108698	GCAT		6.13868e-16	-0.2797	SARS2		3.6334e-13	-0.322909	PAQR4		6.15515e-12	-0.465154	TUBA1C	Prognostic genes	9.01009e-13	-0.463702
1759	GNPDA1		6.46194e-35	0.166062	BOD1		1.71793e-32	-0.0123634	CLUAP1	Prognostic genes	3.82186e-35	0.0108771	MAP4		6.13868e-16	-0.279588	SCNM1		3.65338e-13	-0.322597	CHCHD6		6.17376e-12	-0.464833	TTC7A		9.04099e-13	-0.463335
1760	FKBP8		6.56192e-35	0.166082	FAM126A		1.76475e-32	-0.0123569	SMURF2		3.83887e-35	0.0108773	WDR43		6.25448e-16	-0.279171	OSTC		3.68137e-13	-0.322586	PUSL1		6.18305e-12	-0.464526	AHCTF1		9.0688e-13	-0.463085
1761	UBAC2		7.05611e-35	0.166107	TGFBR3L		1.81906e-32	-0.0123413	TP53	Known disease genes	3.87268e-35	0.0108815	ANAPC1		6.25532e-16	-0.279077	PRR7		3.71474e-13	-0.322529	TNFRSF18		6.30913e-12	-0.464419	GPD1L		9.27777e-13	-0.462879
1762	ACOX1		7.35368e-35	0.166191	TTC9C		1.82729e-32	-0.0122853	NSF		3.90442e-35	0.0108818	DNAJC27	Prognostic genes	6.37389e-16	-0.278979	LRP1		3.75104e-13	-0.322131	BMPR1A		6.34096e-12	-0.464401	NEK5		9.29767e-13	-0.462756
1763	NABP2		7.40793e-35	0.166229	FKBP10		1.83309e-32	-0.0122846	WASL		3.96801e-35	0.0108822	AMPD2		6.48161e-16	-0.278923	ETV1		3.7704e-13	-0.321923	JTB		6.3637e-12	-0.46414	PKM	Prognostic genes	9.36685e-13	-0.462483
1764	C3orf14		7.51332e-35	0.16674	NUDT21	Known disease genes	1.89675e-32	-0.0122742	MRPS25		4.04985e-35	0.0108919	NCBP2		6.51344e-16	-0.278512	HARS2		3.86862e-13	-0.321904	RNF185		6.37135e-12	-0.464093	MTMR9		9.3998e-13	-0.46221
1765	FSTL1		8.02026e-35	0.167023	SLC25A23		1.95588e-32	-0.012266	FKBP10		4.1297e-35	0.0109092	TMEM214		6.707e-16	-0.278481	PNRC2		3.93445e-13	-0.321495	GTPBP3		6.39245e-12	-0.464012	FAM166B		9.81326e-13	-0.462018
1766	SIVA1		8.02026e-35	0.167187	QTRT1		1.98632e-32	-0.0122508	SAP30BP		4.14701e-35	0.010913	SLC19A1	Known disease genes	6.73513e-16	-0.278413	PLEKHH2		4.22206e-13	-0.321174	FEM1C		6.45683e-12	-0.46355	FOXP1		1.00303e-12	-0.461253
1767	GHDC		8.10835e-35	0.167238	PAPSS2		1.98978e-32	-0.0121523	NOB1		4.2188e-35	0.0109133	B4GAT1		6.80111e-16	-0.277969	EIF1AD		4.29797e-13	-0.320887	NINJ2		6.51037e-12	-0.463399	TBC1D15		1.02563e-12	-0.460673
1768	SVIL		8.52564e-35	0.167334	PSMD12		2.05925e-32	-0.0121286	MT-ND4L		4.26604e-35	0.0109165	NUP107		7.16915e-16	-0.277793	ZNF195		4.46621e-13	-0.320814	TRPT1		6.54491e-12	-0.463367	TGFB1I1		1.03712e-12	-0.460381
1769	C1orf194		8.98971e-35	0.16747	HSPA9		2.06882e-32	-0.0121109	SSRP1		4.39375e-35	0.0109256	BAK1		7.20234e-16	-0.277479	BSPRY		4.46678e-13	-0.320767	TBC1D5		6.57056e-12	-0.463206	CFAP73		1.05155e-12	-0.460202
1770	CDYL		9.02496e-35	0.167557	NADK		2.11243e-32	-0.0120187	FAM120AOS	Prognostic genes	4.66285e-35	0.0109404	ADGRF1		7.27833e-16	-0.277249	TEX2		4.55357e-13	-0.320679	IP6K1		6.58348e-12	-0.463029	UTP4		1.06328e-12	-0.460052
1771	BCAP31	Prognostic genes	9.14315e-35	0.167596	TMEM67		2.20708e-32	-0.011998	PSMA5	Prognostic genes	5.04083e-35	0.0109422	JUNB	Known disease genes	7.31346e-16	-0.276797	SNRPD1		4.57822e-13	-0.319908	ANKRD22		6.65154e-12	-0.462499	DDOST	Prognostic genes	1.07605e-12	-0.459916
1772	ETV1		9.24429e-35	0.167721	ST6GAL1		2.2653e-32	-0.0119208	ARHGAP26		5.26899e-35	0.0109463	HILPDA		7.33503e-16	-0.275382	FKBP14		4.70003e-13	-0.319633	SERINC3		6.69826e-12	-0.462057	DAAM2		1.08218e-12	-0.459257
1773	NUBP2		9.64951e-35	0.167927	HMGN3		2.35649e-32	-0.0118875	ORMDL3		5.71117e-35	0.0109502	ADCY9		7.37058e-16	-0.275181	ACSL4	Known disease genes	4.72296e-13	-0.319326	PLK3		6.72418e-12	-0.461878	RNASEH1		1.08978e-12	-0.458875
1774	PEA15		9.76685e-35	0.16837	STYX		2.57633e-32	-0.0118679	EIF5B		5.94083e-35	0.0109551	ZNF131		7.45242e-16	-0.274351	CCDC24		4.85128e-13	-0.318326	GALNT2		6.91318e-12	-0.461779	RARRES2		1.11877e-12	-0.45878
1775	ISOC2		9.77797e-35	0.168458	UNC5CL		2.73747e-32	-0.0118208	WFS1		6.09219e-35	0.0109616	IPO9		7.49828e-16	-0.274101	KRT18		4.88396e-13	-0.318176	EPB41L4A		6.95489e-12	-0.461704	MTPAP		1.14103e-12	-0.458607
1776	SYT12		9.78264e-35	0.16847	STX6		2.93578e-32	-0.0117735	CDC42		6.36433e-35	0.0109694	PEX13		7.53948e-16	-0.274046	CCDC170		4.899e-13	-0.317422	IL6ST		6.95766e-12	-0.461536	PRNP		1.16883e-12	-0.458585
1777	HDHD3		9.84438e-35	0.168519	ACSL5		2.949e-32	-0.0117641	VCAN		6.6766e-35	0.0109723	MID1IP1		7.5494e-16	-0.273749	PSPH		5.00563e-13	-0.317081	CFLAR		7.04424e-12	-0.460588	EPHX3		1.17324e-12	-0.45748
1778	RNF187		1.10749e-34	0.168537	ZNF358		3.04943e-32	-0.0117635	PMM1	Prognostic genes	6.68354e-35	0.0109792	SLC39A10		7.71183e-16	-0.273547	ZFP62		5.02366e-13	-0.31661	WWC1		7.06958e-12	-0.460356	CHPF		1.18242e-12	-0.457093
1779	RNF40		1.21491e-34	0.168546	CENPB		3.23597e-32	-0.0116765	CBR1		6.8249e-35	0.0109841	ZNF605		7.75836e-16	-0.273415	PDCD6IP		5.03465e-13	-0.315841	SLC9A7		7.11139e-12	-0.46012	MAP3K4		1.18523e-12	-0.456391
1780	PAFAH1B2		1.24925e-34	0.168655	NELFB		3.51655e-32	-0.0116378	MT-ND2		6.83908e-35	0.0109851	MST1R		7.94687e-16	-0.273234	SUCO		5.11196e-13	-0.31556	SEC61G		7.2157e-12	-0.459434	LEO1		1.18659e-12	-0.455505
1781	CAMK1D		1.49426e-34	0.168951	MXRA7		3.61878e-32	-0.0115546	YIPF3		6.90979e-35	0.0109998	COQ6		8.10154e-16	-0.273223	RHBDF2		5.12554e-13	-0.315374	PDCL		7.31688e-12	-0.459345	CXCL3		1.18688e-12	-0.455344
1782	SNRNP200		1.63761e-34	0.168953	WASF2		3.96056e-32	-0.0115348	PCBP1		7.42226e-35	0.011	XPNPEP3	Prognostic genes	8.14743e-16	-0.273086	THOP1		5.14596e-13	-0.314893	VDAC1		7.33862e-12	-0.458584	SPICE1		1.18695e-12	-0.455143
1783	CFAP126		1.65023e-34	0.169028	LPIN2		3.9658e-32	-0.0115289	PPIB		7.50954e-35	0.011009	PKIG		8.20406e-16	-0.272728	AHCY	Known disease genes	5.22904e-13	-0.314559	CPSF1		7.61181e-12	-0.45793	CDH1		1.18876e-12	-0.45478
1784	MMP7		1.66354e-34	0.169072	TBCD		3.98131e-32	-0.0115046	DNAJC8	Prognostic genes	7.5549e-35	0.0110099	FBXL5		8.47147e-16	-0.272581	HGS		5.25105e-13	-0.314425	HLA-DRB5		7.78901e-12	-0.45712	RAPGEF5		1.21007e-12	-0.454124
1785	KCTD20		1.66847e-34	0.169337	FAM104A		4.19615e-32	-0.0114848	HBA2		7.67683e-35	0.0110198	FBLN1		8.85229e-16	-0.272307	TIMM23		5.40374e-13	-0.314125	ZNF219		8.27187e-12	-0.457016	HLA-DRB5		1.22792e-12	-0.453453
1786	CIRBP	Prognostic genes	1.68641e-34	0.169359	C11orf1		4.37213e-32	-0.0114743	MTX1		7.97451e-35	0.01102	TSPAN5		9.10587e-16	-0.271948	MTG2		5.47789e-13	-0.313686	ARPC2		8.43095e-12	-0.456678	ABLIM1	Prognostic genes	1.31731e-12	-0.453429
1787	CAPN5		1.71166e-34	0.169501	GTPBP4		4.44547e-32	-0.0114341	TFDP1		8.7809e-35	0.0110228	UCHL3		9.15821e-16	-0.271327	NDUFS2		5.50752e-13	-0.313542	SLC20A1		8.55263e-12	-0.456377	LMNB2		1.3341e-12	-0.452199
1788	MAFG		1.79695e-34	0.169535	CHST15		4.6801e-32	-0.0113725	TIMP3		9.31108e-35	0.0110257	MRPS30		9.28845e-16	-0.271199	C1orf194		5.66388e-13	-0.313423	BTD		8.6122e-12	-0.456197	UNG		1.38618e-12	-0.452069
1789	RAD1		1.82063e-34	0.169542	MCM4		5.1184e-32	-0.0113599	ARF6		9.34425e-35	0.0110347	AP1M2		9.45002e-16	-0.271064	RRS1	Known disease genes	5.69032e-13	-0.312533	TIPRL		8.74381e-12	-0.454761	CDYL		1.40736e-12	-0.451766
1790	MAP7D1		1.89338e-34	0.169804	TFDP1		5.17475e-32	-0.0112388	ADRM1		9.42176e-35	0.0110527	PSMB2		9.47979e-16	-0.270213	TTLL12		5.70903e-13	-0.312458	NOC2L		8.85578e-12	-0.454725	HINFP		1.46105e-12	-0.451756
1791	OLFM1		1.96066e-34	0.16985	CST7		6.23151e-32	-0.0112332	USE1		9.43178e-35	0.0110576	LCP1		9.59999e-16	-0.269939	EFNB1		5.88786e-13	-0.312295	RMDN2	Prognostic genes	8.85838e-12	-0.454544	NTMT1	Prognostic genes	1.47541e-12	-0.451321
1792	GALNT11		2.06858e-34	0.169946	TNNT2		6.24373e-32	-0.0111878	EIF5		9.83877e-35	0.0110707	ACP1		9.61379e-16	-0.26985	SPINT1		6.00877e-13	-0.312223	TMEM263		8.91594e-12	-0.454426	PLEKHA2		1.48668e-12	-0.450586
1793	QPRT		2.10221e-34	0.170128	TPD52L2		6.30973e-32	-0.0111795	NAMPT		1.04556e-34	0.0110721	AKR1C1		9.7358e-16	-0.269244	C1QC		6.03778e-13	-0.311819	RPS6KA1		8.98052e-12	-0.453994	TSC22D3		1.50611e-12	-0.450153
1794	PPP4R2		2.1524e-34	0.170205	PPP1R18		6.78061e-32	-0.0111245	KRT16		1.15546e-34	0.0110862	NDEL1		9.81143e-16	-0.268673	BOLA3		6.04107e-13	-0.311701	TMEM165		9.02483e-12	-0.453417	PTN		1.51958e-12	-0.449928
1795	PFDN1		2.18726e-34	0.170251	UGCG		6.84143e-32	-0.0111093	POLR2K		1.17325e-34	0.0110887	PM20D2		9.88897e-16	-0.268228	CPAMD8		6.04507e-13	-0.311414	MZT2A		9.0334e-12	-0.453391	NUP210		1.51958e-12	-0.449715
1796	C9orf135		2.43658e-34	0.170267	SLC26A9		7.01555e-32	-0.0111006	MANEAL		1.39913e-34	0.0110978	BROX		9.90314e-16	-0.267068	UTP4		6.0932e-13	-0.310913	LRRC23		9.0726e-12	-0.453361	PAIP1		1.53135e-12	-0.449162
1797	MANEAL		2.51916e-34	0.170336	SAT2		7.09498e-32	-0.0110296	ANKRD22		1.52198e-34	0.0111093	DPH7		1.03582e-15	-0.266491	NAE1		6.27355e-13	-0.310863	EZH1		9.20087e-12	-0.453313	FBXW2		1.54405e-12	-0.448753
1798	STX6		2.59989e-34	0.170402	PLOD2	Prognostic genes	7.75489e-32	-0.0110048	CHD4		1.56023e-34	0.0111098	CIAO1		1.05203e-15	-0.266473	SCUBE3		6.45043e-13	-0.310514	NUP210		9.37934e-12	-0.453143	BOLA3		1.58346e-12	-0.448659
1799	CFAP45		2.65954e-34	0.170554	NLN		8.35489e-32	-0.0109898	MPP6		1.64847e-34	0.0111113	QSOX2		1.06606e-15	-0.266448	PCGF1		6.59542e-13	-0.310119	BET1		9.54789e-12	-0.452925	WDR43		1.60455e-12	-0.448542
1800	NFKBIL1		2.77407e-34	0.170597	MIEN1		8.41414e-32	-0.0109544	ACSL5		1.69773e-34	0.0111205	HNRNPA2B1		1.08262e-15	-0.266432	FRK		6.59624e-13	-0.310028	TRAF3IP2		9.5696e-12	-0.452881	PARP2		1.64294e-12	-0.448091
1801	RGS17		2.9286e-34	0.170675	LAMC1		8.52355e-32	-0.0109395	LPIN2		1.74538e-34	0.0111311	UBE2Q1		1.10039e-15	-0.26611	SNTN		6.66037e-13	-0.309801	AHCY	Known disease genes	9.57473e-12	-0.452809	METTL5		1.65408e-12	-0.447776
1802	SRGAP3		2.93879e-34	0.170688	CCNI		8.64068e-32	-0.0109206	PABPC4	Known disease genes	1.84346e-34	0.0111336	ZSWIM4		1.12449e-15	-0.265835	LYRM9		6.67343e-13	-0.309784	FCGRT		9.66075e-12	-0.452254	AIF1		1.67593e-12	-0.447519
1803	ANKRD9		2.94464e-34	0.171104	SEMA4C		9.84096e-32	-0.0109107	SKA2		1.90802e-34	0.0111464	CCDC120		1.14654e-15	-0.265605	BANP		6.71958e-13	-0.309709	WDR55		9.70595e-12	-0.451334	FAM3C		1.67737e-12	-0.44751
1804	MTHFD1L		2.94496e-34	0.171295	KISS1		1.0206e-31	-0.0108761	ZDHHC1		1.96813e-34	0.0111469	CEP131		1.15147e-15	-0.265604	TMEM245		6.80618e-13	-0.309491	COA7		9.71647e-12	-0.451212	B4GALT7		1.70449e-12	-0.446818
1805	TACSTD2		3.08084e-34	0.171304	VAV2		1.05156e-31	-0.0108645	P3H4		2.0076e-34	0.0111488	TMEM165		1.15608e-15	-0.26555	KDSR		6.80988e-13	-0.309459	SLC12A7		9.71807e-12	-0.451132	ESYT3		1.71136e-12	-0.446486
1806	FAXC		3.16546e-34	0.171417	ITGB5		1.08391e-31	-0.0108338	MTDH		2.02434e-34	0.0111492	RAD51C		1.18193e-15	-0.265507	QPCT		6.8138e-13	-0.307488	PAIP1		9.86329e-12	-0.451016	NR2C2AP		1.71978e-12	-0.446285
1807	MAPK1IP1L		3.23606e-34	0.171534	PARK7	Prognostic genes	1.12257e-31	-0.0108185	TRIO		2.05888e-34	0.0111556	TCEA1		1.1858e-15	-0.26508	EIF4G3		6.8781e-13	-0.3073	ITPR1		9.93781e-12	-0.450588	TIPRL		1.72145e-12	-0.445961
1808	TREM1		3.37834e-34	0.171534	SMAD3		1.12576e-31	-0.0108074	PLXNA3	Prognostic genes	2.19393e-34	0.0111561	CTSS		1.18887e-15	-0.264631	SOX11		6.89729e-13	-0.306795	SLC9A3R2		9.94682e-12	-0.449569	PRSS12		1.76639e-12	-0.445884
1809	UBE2Q1		3.59025e-34	0.171567	MIIP		1.24709e-31	-0.0108052	C4orf3		2.24252e-34	0.0111621	EPS8L1		1.19451e-15	-0.26447	DRC3		6.95883e-13	-0.306383	LAMA3		1.02239e-11	-0.44916	MOSPD2		1.84827e-12	-0.445883
1810	MRPL10		3.97251e-34	0.171663	PRKCA		1.33191e-31	-0.0107438	BCAT1		2.25442e-34	0.0111671	CREB3L2		1.21931e-15	-0.264176	BPNT1		7.03475e-13	-0.306322	MYD88		1.02694e-11	-0.448688	CLIC2		1.87179e-12	-0.445848
1811	UCHL5		3.98522e-34	0.171681	TSEN54		1.38141e-31	-0.010737	GLO1		2.29417e-34	0.0111687	ARHGAP23		1.24454e-15	-0.262738	HAUS5		7.05369e-13	-0.306284	RBBP4		1.04256e-11	-0.448013	TMEM263		1.90138e-12	-0.445699
1812	UBE2T		4.07991e-34	0.171685	NIFK		1.41243e-31	-0.0107362	RPN1		2.47653e-34	0.0112041	SCD5		1.25423e-15	-0.262734	LRRC42		7.06761e-13	-0.304844	USP39		1.04869e-11	-0.446578	SERPINB6		1.90749e-12	-0.445632
1813	TMEM107		4.45909e-34	0.171762	BRAT1		1.41346e-31	-0.0107319	PLEK2		2.62228e-34	0.011207	PHF14		1.27191e-15	-0.262661	RPS6KC1	Known disease genes	7.14329e-13	-0.304829	DBI		1.05056e-11	-0.446031	AMZ2		1.95849e-12	-0.445356
1814	MEX3D		4.75893e-34	0.171969	MRPL15		1.42579e-31	-0.0106757	ARCN1		2.66096e-34	0.0112172	MARK2		1.27296e-15	-0.262151	RNH1		7.15231e-13	-0.304824	S100PBP		1.05214e-11	-0.445525	TYW5		1.97828e-12	-0.444916
1815	PTK6		4.95759e-34	0.172234	ARCN1		1.51277e-31	-0.010657	TNRC18		3.21188e-34	0.0112184	MRPS35		1.3128e-15	-0.261612	GGCX		7.30317e-13	-0.304555	ANP32E		1.0665e-11	-0.445136	RRP36		1.97842e-12	-0.444859
1816	HPRT1		4.97541e-34	0.172439	FUT3		1.68407e-31	-0.0106422	FANK1		3.37e-34	0.0112205	ANKIB1	Prognostic genes	1.35303e-15	-0.261458	SS18L1		7.33921e-13	-0.303371	AMZ2		1.07094e-11	-0.444942	KANK1	Prognostic genes	2.00728e-12	-0.443938
1817	NUP160		5.39315e-34	0.172492	RND3		1.69534e-31	-0.0105772	PRAF2		3.73921e-34	0.0112375	CDK7		1.35353e-15	-0.26042	EEF1E1		7.34521e-13	-0.302951	EIF4G3		1.09041e-11	-0.44468	KIF6		2.01054e-12	-0.443666
1818	IMP4		5.57506e-34	0.1725	CD164L2		1.72895e-31	-0.0105237	NOC2L		3.95103e-34	0.0112412	C1orf226		1.39194e-15	-0.259865	EPHB3		7.39063e-13	-0.302652	SMPDL3B		1.09057e-11	-0.444535	CYSTM1		2.08308e-12	-0.443527
1819	EIF4H		5.8739e-34	0.172557	SYNRG		1.92986e-31	-0.0105215	FEZ2		4.13043e-34	0.0112458	SPIRE2		1.4083e-15	-0.259751	VDAC1		7.42179e-13	-0.302619	DTX2		1.17108e-11	-0.444456	APEX1	Known disease genes	2.08802e-12	-0.443103
1820	SRP14	Prognostic genes	6.02624e-34	0.172646	SPA17		1.93725e-31	-0.0104824	CHST15		4.2535e-34	0.0112506	CLDN9		1.50707e-15	-0.259593	DYNLRB2		7.52163e-13	-0.302102	SPECC1L		1.18236e-11	-0.444113	AMMECR1		2.10856e-12	-0.44261
1821	XBP1		6.29895e-34	0.172656	MYH9		2.13553e-31	-0.0104599	CBLB		4.30554e-34	0.011252	TIPRL		1.51062e-15	-0.258935	EIF4EBP1		7.62699e-13	-0.301876	PTK2B		1.18339e-11	-0.444051	POLR3K		2.20722e-12	-0.442588
1822	PRSS8		6.88793e-34	0.172736	MAP2K7		2.19777e-31	-0.0104097	LY6D		4.31046e-34	0.0112549	PSD3		1.51662e-15	-0.258919	TLE4		7.86417e-13	-0.301487	NOMO1		1.20847e-11	-0.444013	GLMP		2.24195e-12	-0.442332
1823	ABCE1		6.91398e-34	0.172826	KIAA0100		2.21691e-31	-0.0104032	GPRC5C	Prognostic genes	4.59842e-34	0.0112885	ERCC2		1.53598e-15	-0.258918	YIPF2		7.92947e-13	-0.301229	IMP4		1.21914e-11	-0.44398	ZNF514		2.2969e-12	-0.442269
1824	METRNL	Prognostic genes	7.10239e-34	0.172858	SCNM1		2.49295e-31	-0.0103882	UBE2M		4.71811e-34	0.0112956	WDR90		1.67444e-15	-0.258857	ARID4A		7.9533e-13	-0.300739	SPRY2		1.22588e-11	-0.443869	TACO1		2.30322e-12	-0.442212
1825	ZMAT2		7.42491e-34	0.173054	PDP1		2.54438e-31	-0.0103688	NABP1		4.74903e-34	0.0113113	SUPV3L1		1.70223e-15	-0.2583	ACAP3		8.09165e-13	-0.30069	UNC119		1.22615e-11	-0.443739	KPNA3		2.3224e-12	-0.441917
1826	GLIS2		7.86242e-34	0.17327	RBBP7		2.54833e-31	-0.0103457	HABP2		4.9831e-34	0.0113114	DIAPH2		1.76592e-15	-0.258079	SF3B3		8.21335e-13	-0.300534	CLN5		1.22916e-11	-0.442882	COL4A4		2.39978e-12	-0.441417
1827	TNC		8.5295e-34	0.173279	NAA50		2.55231e-31	-0.0102378	TDG		5.03443e-34	0.0113147	PCSK1N		1.80756e-15	-0.257901	JTB		8.21442e-13	-0.300251	RNF128		1.24976e-11	-0.442587	USP39		2.42842e-12	-0.441073
1828	NELFB		8.53602e-34	0.17354	ACVR1B		2.79902e-31	-0.0101593	METTL9		5.06839e-34	0.0113268	ENOPH1		1.81292e-15	-0.257877	FAM76A		8.54165e-13	-0.300206	MX2		1.25058e-11	-0.442538	NOLC1		2.45712e-12	-0.440874
1829	RALY		8.54837e-34	0.173616	GGNBP2		2.82883e-31	-0.0101459	PPP1R9B		5.24426e-34	0.0113404	UQCRH		1.82719e-15	-0.257744	PDGFRL		8.61927e-13	-0.300192	HNRNPA2B1		1.26436e-11	-0.442286	MTERF3		2.49857e-12	-0.440753
1830	PRRX2		8.62874e-34	0.173771	AGPAT2		2.8301e-31	-0.0101308	FILIP1L		5.3381e-34	0.0113404	RAD9A		1.85546e-15	-0.257599	SIGMAR1		8.67381e-13	-0.299997	RHPN1		1.2918e-11	-0.441631	EVL		2.51575e-12	-0.440636
1831	FAM126A		8.88007e-34	0.173885	PDLIM3		2.92034e-31	-0.0101297	NTPCR		5.4067e-34	0.011347	AP1S2		1.90165e-15	-0.257579	ADGRA3		8.68174e-13	-0.299715	UNC13D		1.29613e-11	-0.441564	MRPS5	Known disease genes	2.53153e-12	-0.440092
1832	PRSS23		9.01887e-34	0.173972	TAOK1		2.94997e-31	-0.0101294	PSMC6		5.4067e-34	0.0113714	FH		2.01253e-15	-0.257301	NDUFS6		8.81424e-13	-0.298007	CLSTN3		1.30839e-11	-0.441333	RGS14		2.54387e-12	-0.439993
1833	TAF11		9.58865e-34	0.173983	MPLKIP		3.10965e-31	-0.0100533	GGNBP2		5.42792e-34	0.0113757	RPL36A	Known disease genes	2.03301e-15	-0.256829	C2orf68		8.82189e-13	-0.298005	PLAU	Prognostic genes	1.32074e-11	-0.441276	JMJD4		2.55992e-12	-0.439449
[truncated: 70 more rows]
