# Supplementary material for: Benchmarking integration of single-cell differential expression
Source: Research Square preprint supplement (doi:10.21203/rs.3.rs-1723455/v1), 2022-06-13
Supplement: Supplementary file 2 [file TableS2.xlsx]

## Sheet: Sheet1
		scRNA-seq Epithelial cells data								TCGA bulk sample data
		Raw_Wilcox	limmatrend	MNN_limmatrend	MAST	DESeq2	ZW_DESeq2_Cov	edgeR_Cov	ZW_edgeR_Cov	DESeq2	edgeR	limma	limmatrend
	Gold standard detection	19/28	14/18	19/27	29/44	32/45	30/47	34/50	34/50	32/50	32/50	26/50	26/50
Cancer associated processes	cell proliferation/cell fate and differentiation	4/20	4/20	4/20	5/20	6/20	6/20	6/20	7/20	6/20	6/20	5/20	6/20
	cell survival	0/15	0/15	1/15	4/15	2/15	3/15	4/15	4/15	0/15	0/15	0/15	0/15
	cell metabolism	4/21	2/21	3/21	5/21	4/21	3/21	4/21	4/21	7/21	6/21	4/21	4/21
	cell polarity and migration	3/9	2/9	2/9	3/9	3/9	3/9	3/9	4/9	1/9	2/9	2/9	1/9
	genomic instability	0/15	0/15	0/15	0/15	0/15	0/15	0/15	0/15	5/15	5/15	5/15	5/15
	inflammation	0/31	0/31	1/31	2/31	2/31	2/31	3/31	1/31	7/31	7/31	5/31	5/31
	angiogenesis	1/6	1/6	1/6	1/6	1/6	1/6	1/6	2/6	0/6	0/6	0/6	0/6
Oncogenic signaling pathways	HIPPO pathway	0/5	0/5	0/5	1/5	1/5	2/5	1/5	1/5	0/5	0/5	0/5	0/5
	NOTCH pathway	0/4	0/4	0/4	0/4	1/4	1/4	2/4	0/4	0/4	0/4	0/4	0/4
	oxidative stress	0/12	4/12	3/12	0/12	5/12	5/12	1/12	1/12	2/12	2/12	3/12	3/12
	PI3K pathway	2/5	0/5	1/5	2/5	2/5	2/5	2/5	2/5	0/5	0/5	0/5	0/5
	RTK/RAS/MAPK pathway	1/17	0/17	0/17	1/17	1/17	0/17	2/17	3/17	2/17	2/17	2/17	2/17
	TGF-beta pathway	0/3	0/3	0/3	0/3	0/3	0/3	0/3	0/3	1/3	1/3	0/3	0/3
	p53 pathway	2/3	0/3	1/3	3/3	2/3	1/3	1/3	1/3	0/3	0/3	0/3	0/3
	WNT pathway	0/8	0/8	0/8	1/8	1/8	0/8	0/8	0/8	0/8	0/8	0/8	0/8
Others	Keywords: cancer, carcinoma, tumor	2/17	1/17	2/17	2/17	2/17	2/17	4/17	4/17	2/17	2/17	1/17	1/17
