# Supplementary material for: Benchmarking integration of single-cell differential expression
Source: Research Square preprint supplement (doi:10.21203/rs.3.rs-1723455/v1), 2022-06-13
Supplement: Supplementary file 3 [file TableS3.xlsx]

## Sheet: Sheet1
	scRNA-seq Epithelial cells data												TCGA bulk sample data
	ZW_edgeR_Cov				DESeq2				edgeR_Cov				average_4 TCGA methods
Rank (adjusted.pvalue)	pathway	GS category	GSEA adjusted.pvalue	Enrichment Score	pathway	GS category	GSEA adjusted.pvalue	Enrichment Score	pathway	GS category	GSEA adjusted.pvalue	Enrichment Score	pathway	GS category	GSEA adjusted.pvalue	Enrichment Score						GS category
1	Ciliopathies WP4803	cell polarity and migration	1.17333e-08	-0.736496	Ciliopathies WP4803	cell polarity and migration	1.17333e-08	-0.727893	Ciliopathies WP4803	cell polarity and migration	1.17333e-08	-0.741235	Allograft Rejection WP2328		4.62391e-06	-0.718624					Cancer associated processes	cell proliferation/cell fate and differentiation
2	Cytoplasmic Ribosomal Proteins WP477	cell proliferation/cell fate and differentiation	1.17333e-08	0.673696	Cytoplasmic Ribosomal Proteins WP477	cell proliferation/cell fate and differentiation	1.17333e-08	0.932507	Cytoplasmic Ribosomal Proteins WP477	cell proliferation/cell fate and differentiation	1.17333e-08	0.727081	DNA Replication WP466	cell proliferation/cell fate and differentiation	0.000922867	0.734666						cell survival
3	Genes related to primary cilium development (based on CRISPR) WP4536	cell polarity and migration	1.17333e-08	-0.762093	VEGFA-VEGFR2 Signaling Pathway WP3888	angiogenesis	1.17333e-08	0.606075	Genes related to primary cilium development (based on CRISPR) WP4536	cell polarity and migration	1.17333e-08	-0.729811	MAPK Signaling Pathway WP382	RTK/RAS/MAPK pathway	0.00139851	-0.436116						cell metabolism
4	VEGFA-VEGFR2 Signaling Pathway WP3888	angiogenesis	3.98187e-06	0.413977	Genes related to primary cilium development (based on CRISPR) WP4536	cell polarity and migration	2.07956e-08	-0.679616	VEGFA-VEGFR2 Signaling Pathway WP3888	angiogenesis	1.35115e-06	0.430852	Retinoblastoma gene in cancer WP2446		0.00139851	0.578669						cell polarity and migration
5	Vitamin D Receptor Pathway WP2877	cell proliferation/cell fate and differentiation	1.44554e-05	0.55354	Proteasome Degradation WP183	cell proliferation/cell fate and differentiation	2.49579e-05	0.743246	Vitamin D Receptor Pathway WP2877	cell proliferation/cell fate and differentiation	0.000294236	0.531463	G Protein Signaling Pathways WP35		0.00139851	-0.596269						genomic instability
6	Metabolic reprogramming in colon cancer WP4290	cell metabolism	0.000139366	0.643106	Electron Transport Chain (OXPHOS system in mitochondria) WP111	oxidative stress	8.82344e-05	0.703236	Pathways in clear cell renal cell carcinoma WP4018	Keywords: cancer, carcinoma, tumor	0.000322343	0.57352	Metabolic reprogramming in colon cancer WP4290	cell metabolism	0.00139851	0.669058						inflammation
7	PI3K-Akt signaling pathway WP4172	PI3K pathway	0.000175885	0.446248	Translation Factors WP107	cell proliferation/cell fate and differentiation	0.000171679	0.74891	PI3K-Akt signaling pathway WP4172	PI3K pathway	0.000414027	0.456231	DNA Repair Pathways Full Network WP4946	genomic instability	0.00279523	0.512552						angiogenesis
8	Intraflagellar transport proteins binding to dynein WP4532		0.000211901	-0.710181	mRNA Processing WP411		0.000403183	0.618309	Proteasome Degradation WP183	cell proliferation/cell fate and differentiation	0.000761364	0.58179	White fat cell differentiation WP4149		0.00279523	-0.720157					Oncogenic signaling pathways	HIPPO pathway
9	Proteasome Degradation WP183	cell proliferation/cell fate and differentiation	0.000266487	0.57279	Nonalcoholic fatty liver disease WP4396		0.000478395	0.621011	Focal Adhesion WP306	cell polarity and migration	0.00117761	0.471884	DNA IR-damage and cellular response via ATR WP4016	genomic instability	0.00405934	0.574022						NOTCH pathway
10	Joubert Syndrome WP4656		0.000266487	-0.480634	Pathways in clear cell renal cell carcinoma WP4018	Keywords: cancer, carcinoma, tumor	0.00481671	0.662564	Metabolic reprogramming in colon cancer WP4290	cell metabolism	0.00138659	0.617004	Ras signaling WP4223	RTK/RAS/MAPK pathway	0.00589338	-0.460257						oxidative stress
11	Pathways in clear cell renal cell carcinoma WP4018	Keywords: cancer, carcinoma, tumor	0.00027906	0.5472	Metabolic reprogramming in colon cancer WP4290	cell metabolism	0.0048332	0.730604	Cholesterol metabolism (includes both Bloch and Kandutsch-Russell pathways) WP4718	cell metabolism	0.00324306	-0.563039	Spinal Cord Injury WP2431		0.00613989	-0.532979						PI3K pathway
12	Glycolysis and Gluconeogenesis WP534	cell metabolism	0.000941467	0.642485	PPAR signaling pathway WP3942	cell proliferation/cell fate and differentiation	0.00772376	-0.605372	Intraflagellar transport proteins binding to dynein WP4532		0.00324306	-0.683273	Base Excision Repair WP4752	genomic instability	0.00712611	0.656976						RTK/RAS/MAPK pathway
13	Focal Adhesion-PI3K-Akt-mTOR-signaling pathway WP3932	PI3K pathway	0.00101824	0.427445	Glycolysis and Gluconeogenesis WP534	cell metabolism	0.00782946	0.748419	Arrhythmogenic Right Ventricular Cardiomyopathy WP2118		0.00368	0.619905	Pyrimidine metabolism WP4022	cell metabolism	0.00769425	0.532755						TGF-beta pathway
14	Arrhythmogenic Right Ventricular Cardiomyopathy WP2118		0.0016539	0.612029	PI3K-Akt signaling pathway WP4172	PI3K pathway	0.0159962	0.550265	Focal Adhesion-PI3K-Akt-mTOR-signaling pathway WP3932	PI3K pathway	0.00502249	0.424151	Adipogenesis WP236		0.00793722	-0.47861						p53 pathway
15	Retinoblastoma gene in cancer WP2446		0.00210145	0.528953	Mitochondrial CIV Assembly WP4922	oxidative stress	0.0159962	0.723376	Glycolysis and Gluconeogenesis WP534	cell metabolism	0.00516571	0.629008	Ebola Virus Pathway on Host WP4217		0.00793722	-0.452227						WNT pathway
16	Focal Adhesion WP306	cell polarity and migration	0.00364654	0.438618	Pathogenic Escherichia coli infection WP2272		0.0168364	0.679296	Hippo-Merlin Signaling Dysregulation WP4541	HIPPO pathway	0.00684513	0.522625	Cholesterol metabolism (includes both Bloch and Kandutsch-Russell pathways) WP4718	cell metabolism	0.00793722	-0.596747					Others	Keywords: cancer, carcinoma, tumor
17	Immune response to tuberculosis WP4197		0.00373671	0.661482	nsp1 from SARS-CoV-2 inhibits translation initiation in the host cell WP5027		0.0168364	0.813763	16p11.2 proximal deletion syndrome WP4949		0.0102602	0.516699	PPAR signaling pathway WP3942	cell proliferation/cell fate and differentiation	0.00793722	-0.581282
18	Hippo-Merlin Signaling Dysregulation WP4541	HIPPO pathway	0.00688629	0.507723	Pyrimidine metabolism WP4022	cell metabolism	0.0231287	0.630438	Senescence and Autophagy in Cancer WP615	cell survival	0.0104003	0.467198	DNA Mismatch Repair WP531	genomic instability	0.0148111	0.695676
19	G1 to S cell cycle control WP45	cell proliferation/cell fate and differentiation	0.0158794	0.515908	Mitochondrial complex I assembly model OXPHOS system WP4324	oxidative stress	0.0231287	0.65587	Immune response to tuberculosis WP4197		0.0109294	0.65059	T-cell receptor (TCR) signaling pathway WP69	inflammation	0.0156344	-0.517374
20	Cell cycle WP179	cell proliferation/cell fate and differentiation	0.0158794	0.446826	Mitochondrial complex III assembly WP4921	oxidative stress	0.0403124	0.792759	PPAR signaling pathway WP3942	cell proliferation/cell fate and differentiation	0.0123244	-0.503355	mRNA Processing WP411		0.0158231	0.423255
21	16p11.2 proximal deletion syndrome WP4949		0.0249013	0.482393	Oxidative phosphorylation WP623	oxidative stress	0.0453645	0.675482	Myometrial relaxation and contraction pathways WP289		0.026345	0.44727	Microglia Pathogen Phagocytosis Pathway WP3937		0.0158231	-0.634568
22	One-carbon metabolism WP241	cell metabolism	0.034313	0.596865	16p11.2 proximal deletion syndrome WP4949		0.0562166	0.61954	Joubert Syndrome WP4656		0.0268109	-0.412275	Trans-sulfuration and one-carbon metabolism WP2525	cell metabolism	0.0187776	0.661945
23	Parkin-Ubiquitin Proteasomal System pathway WP2359	cell proliferation/cell fate and differentiation	0.0426774	0.485685	Photodynamic therapy-induced HIF-1 survival signaling WP3614	cell survival	0.0807776	0.69125	Ebola Virus Pathway on Host WP4217		0.0301023	0.430607	Hedgehog Signaling Pathway WP4249	cell proliferation/cell fate and differentiation	0.0415692	-0.658841
24	Cholesterol metabolism (includes both Bloch and Kandutsch-Russell pathways) WP4718	cell metabolism	0.0427043	-0.440737	Arrhythmogenic Right Ventricular Cardiomyopathy WP2118		0.107019	0.660469	Retinoblastoma gene in cancer WP2446		0.0323014	0.482442	Glycolysis and Gluconeogenesis WP534	cell metabolism	0.0451009	0.586088
25	Photodynamic therapy-induced HIF-1 survival signaling WP3614	cell survival	0.0427043	0.559715	Focal Adhesion-PI3K-Akt-mTOR-signaling pathway WP3932	PI3K pathway	0.117752	0.520044	IL-18 signaling pathway WP4754	inflammation	0.0323628	0.379727	Amino Acid metabolism WP3925	cell metabolism	0.0451009	0.488721
26	Fas ligand pathway and stress induction of heat shock proteins WP314		0.0454945	0.52237	Myometrial relaxation and contraction pathways WP289		0.124741	0.562414	mRNA Processing WP411		0.034932	0.410677	Complement system WP2806		0.0477536	-0.508753
27	Oxidation by Cytochrome P450 WP43	oxidative stress	0.0454945	-0.604285	Cholesterol metabolism (includes both Bloch and Kandutsch-Russell pathways) WP4718	cell metabolism	0.134845	-0.51489	Hepatitis C and Hepatocellular Carcinoma WP3646	Keywords: cancer, carcinoma, tumor	0.0356491	0.544181	B Cell Receptor Signaling Pathway WP23	inflammation	0.0504584	-0.440977
28	Spinal Cord Injury WP2431		0.0454945	0.456548	IL-18 signaling pathway WP4754	inflammation	0.150089	0.506506	Translation Factors WP107	cell proliferation/cell fate and differentiation	0.0393115	0.506234	Oxidation by Cytochrome P450 WP43	oxidative stress	0.0504584	-0.699594
29	Pancreatic adenocarcinoma pathway WP4263	Keywords: cancer, carcinoma, tumor	0.0477648	0.437551	7q11.23 copy number variation syndrome WP4932		0.150089	0.581413	Allograft Rejection WP2328		0.0393115	-0.445678	Regulation of Actin Cytoskeleton WP51	cell polarity and migration	0.0530299	-0.404376
30	mRNA Processing WP411		0.0477648	0.393813	Ebola Virus Pathway on Host WP4217		0.162219	0.543733	Photodynamic therapy-induced HIF-1 survival signaling WP3614	cell survival	0.0393115	0.573481	ESC Pluripotency Pathways WP3931	cell proliferation/cell fate and differentiation	0.0542394	-0.45896
31	TP53 network WP1742	p53 pathway	0.0535078	0.64404	Host-pathogen interaction of human coronaviruses - MAPK signaling WP4877	RTK/RAS/MAPK pathway	0.163911	0.64997	Integrated breast cancer pathway WP1984	Keywords: cancer, carcinoma, tumor	0.0534552	0.400455	Cell cycle WP179	cell proliferation/cell fate and differentiation	0.0542394	0.424857
32	Pathogenic Escherichia coli infection WP2272		0.057099	0.493063	Type II interferon signaling (IFNG) WP619	inflammation	0.163911	0.678747	Parkin-Ubiquitin Proteasomal System pathway WP2359	cell proliferation/cell fate and differentiation	0.0534552	0.482664	Brain-derived neurotrophic factor (BDNF) signaling pathway WP2380		0.0542394	-0.396429
33	Myometrial relaxation and contraction pathways WP289		0.0584643	0.416468	p53 transcriptional gene network WP4963	p53 pathway	0.163911	0.601894	Pathogenic Escherichia coli infection WP2272		0.0534552	0.504585	Ciliopathies WP4803	cell polarity and migration	0.0542394	-0.38365
34	ErbB signaling pathway WP673	RTK/RAS/MAPK pathway	0.0669804	0.430503	Vitamin D Receptor Pathway WP2877	cell proliferation/cell fate and differentiation	0.163911	0.552837	Host-pathogen interaction of human coronaviruses - MAPK signaling WP4877	RTK/RAS/MAPK pathway	0.0534552	0.546421	NRF2-ARE regulation WP4357	oxidative stress	0.0557495	0.630905
35	Regulation of Microtubule Cytoskeleton WP2038	cell polarity and migration	0.072292	0.507961	Integrated breast cancer pathway WP1984	Keywords: cancer, carcinoma, tumor	0.164732	0.525588	Oxidation by Cytochrome P450 WP43	oxidative stress	0.0534552	-0.623898	Nuclear receptors WP170		0.0639029	-0.597369
36	Integrated breast cancer pathway WP1984	Keywords: cancer, carcinoma, tumor	0.072292	0.38283	Primary focal segmental glomerulosclerosis (FSGS) WP2572		0.169152	0.600807	Apoptosis-related network due to altered Notch3 in ovarian cancer WP2864	NOTCH pathway	0.0556477	0.499713	Corticotropin-releasing hormone signaling pathway WP2355		0.0639029	-0.453196
37	Apoptosis Modulation and Signaling WP1772	cell survival	0.0747055	0.427116	Intraflagellar transport proteins binding to dynein WP4532		0.202556	-0.579243	Endochondral Ossification WP474		0.0556477	0.535794	Regulation of toll-like receptor signaling pathway WP1449	inflammation	0.0639029	-0.405298
38	Host-pathogen interaction of human coronaviruses - MAPK signaling WP4877	RTK/RAS/MAPK pathway	0.0747055	0.519536	Hippo-Merlin Signaling Dysregulation WP4541	HIPPO pathway	0.203353	0.576884	Endochondral Ossification with Skeletal Dysplasias WP4808		0.0556477	0.535794	TGF-beta Signaling Pathway WP366	TGF-beta pathway	0.0639029	-0.381185
39	Primary focal segmental glomerulosclerosis (FSGS) WP2572		0.0775707	0.468627	Apoptosis-related network due to altered Notch3 in ovarian cancer WP2864	NOTCH pathway	0.203353	0.601806	Notch Signaling WP268	NOTCH pathway	0.0630409	0.523016	Insulin Signaling WP481		0.0639029	-0.364605
40	Small cell lung cancer WP4658	Keywords: cancer, carcinoma, tumor	0.0902178	0.424795	The influence of laminopathies on Wnt signaling WP4844	WNT pathway	0.214482	0.646435	Photodynamic therapy-induced AP-1 survival signaling. WP3611	cell survival	0.0697512	0.516385	Chemokine signaling pathway WP3929	inflammation	0.0639029	-0.411309
41	Apoptosis WP254	cell survival	0.105707	0.424597	Photodynamic therapy-induced AP-1 survival signaling. WP3611	cell survival	0.222635	0.616042	nsp1 from SARS-CoV-2 inhibits translation initiation in the host cell WP5027		0.0767798	0.637672	Gastrin signaling pathway WP4659		0.0683217	-0.390931
42	PPAR signaling pathway WP3942	cell proliferation/cell fate and differentiation	0.107419	-0.380387	Focal Adhesion WP306	cell polarity and migration	0.222635	0.514742	Small cell lung cancer WP4658	Keywords: cancer, carcinoma, tumor	0.0767798	0.439482	DNA IR-double strand breaks and cellular response via ATM WP3959	genomic instability	0.0694672	0.506268
43	IL-18 signaling pathway WP4754	inflammation	0.107419	0.34755	Fas ligand pathway and stress induction of heat shock proteins WP314		0.222635	0.615428	Photodynamic therapy-induced NF-kB survival signaling WP3617	inflammation	0.0810143	0.569138	Gastric Cancer Network 2 WP2363	Keywords: cancer, carcinoma, tumor	0.0694672	0.601923
44	Ebola Virus Pathway on Host WP4217		0.107773	0.386946	TP53 network WP1742	p53 pathway	0.222635	0.715175	Apoptosis WP254	cell survival	0.0810143	0.441748	Thyroid hormones production and their peripheral downstream signaling effects WP4746		0.0740659	-0.460715
45	Senescence and Autophagy in Cancer WP615	cell survival	0.107773	0.399472	Parkin-Ubiquitin Proteasomal System pathway WP2359	cell proliferation/cell fate and differentiation	0.223821	0.57982	RAC1/PAK1/p38/MMP2 Pathway WP3303	RTK/RAS/MAPK pathway	0.0810143	0.470276	Sudden Infant Death Syndrome (SIDS) Susceptibility Pathways WP706		0.0740659	-0.42075
46	RAC1/PAK1/p38/MMP2 Pathway WP3303	RTK/RAS/MAPK pathway	0.107773	0.450391	Nephrotic syndrome WP4758		0.259204	0.63451	Type II interferon signaling (IFNG) WP619	inflammation	0.0851199	0.559398	Genotoxicity pathway WP4286	genomic instability	0.0766458	-0.491492
47	nsp1 from SARS-CoV-2 inhibits translation initiation in the host cell WP5027		0.108885	0.603454	Eukaryotic Transcription Initiation WP405	cell proliferation/cell fate and differentiation	0.259204	0.607752	Primary focal segmental glomerulosclerosis (FSGS) WP2572		0.0851199	0.472319	G1 to S cell cycle control WP45	cell proliferation/cell fate and differentiation	0.0766458	0.481466
48	FGFR3 signaling in chondrocyte proliferation and terminal differentiation WP4767		0.108885	0.567329	RAC1/PAK1/p38/MMP2 Pathway WP3303	RTK/RAS/MAPK pathway	0.259204	0.576331	One-carbon metabolism WP241	cell metabolism	0.0851199	0.564845	Nuclear Receptors Meta-Pathway WP2882		0.0766458	-0.326052
49	Neovascularisation processes WP4331	angiogenesis	0.119299	0.52063	Senescence and Autophagy in Cancer WP615	cell survival	0.259204	0.532366	TP53 network WP1742	p53 pathway	0.0896278	0.625372	IL-3 signaling pathway WP286		0.0828948	-0.519958
50	Nanoparticle-mediated activation of receptor signaling WP2643		0.119299	0.529938	Oxidation by Cytochrome P450 WP43	oxidative stress	0.28695	-0.608429	Fas ligand pathway and stress induction of heat shock proteins WP314		0.132521	0.491142	Glucocorticoid Receptor Pathway WP2880		0.0857094	-0.461581
51	Vitamin B12 metabolism WP1533		0.119299	-0.442549	Aryl Hydrocarbon Receptor Pathway WP2873	RTK/RAS/MAPK pathway	0.289316	0.639075	Non-small cell lung cancer WP4255	Keywords: cancer, carcinoma, tumor	0.132521	0.436815	IL-2 signaling pathway WP49	inflammation	0.0875169	-0.517012
52	Gastric Cancer Network 2 WP2363	Keywords: cancer, carcinoma, tumor	0.119299	0.53485	TNF-alpha signaling pathway WP231	inflammation	0.289316	0.533792	Gastrin signaling pathway WP4659		0.139086	0.392233	Integrated Cancer Pathway WP1971	Keywords: cancer, carcinoma, tumor	0.0875169	0.519017
53	Translation Factors WP107	cell proliferation/cell fate and differentiation	0.121434	0.449318	Head and Neck Squamous Cell Carcinoma WP4674	Keywords: cancer, carcinoma, tumor	0.312553	0.545025	Pancreatic adenocarcinoma pathway WP4263	Keywords: cancer, carcinoma, tumor	0.14128	0.411737	One-carbon metabolism WP241	cell metabolism	0.0878979	0.584524
54	MAPK Signaling Pathway WP382	RTK/RAS/MAPK pathway	0.124263	0.350366	Gastrin signaling pathway WP4659		0.330251	0.515948	ErbB signaling pathway WP673	RTK/RAS/MAPK pathway	0.14128	0.414559	Complement and Coagulation Cascades WP558		0.102073	-0.538292
55	Type I interferon induction and signaling during SARS-CoV-2 infection WP4868	inflammation	0.131718	0.52428	Apoptosis Modulation and Signaling WP1772	cell survival	0.339889	0.534751	Tryptophan metabolism WP465		0.149777	-0.538255	Mitochondrial LC-Fatty Acid Beta-Oxidation WP368	cell metabolism	0.111603	-0.629785
56	Follicle Stimulating Hormone (FSH) signaling pathway WP2035		0.138433	0.539136	Hepatitis C and Hepatocellular Carcinoma WP3646	Keywords: cancer, carcinoma, tumor	0.37072	0.58822	Tumor suppressor activity of SMARCB1 WP4204	Keywords: cancer, carcinoma, tumor	0.149777	0.551711	RANKL/RANK signaling pathway WP2018	inflammation	0.111603	-0.461489
57	Notch Signaling WP268	NOTCH pathway	0.138433	0.475315	Retinoblastoma gene in cancer WP2446		0.37072	0.542807	Metapathway biotransformation Phase I and II WP702		0.160699	-0.335358	Non-genomic actions of 1,25 dihydroxyvitamin D3 WP4341	cell proliferation/cell fate and differentiation	0.113272	-0.460352
58	Apoptosis-related network due to altered Notch3 in ovarian cancer WP2864	NOTCH pathway	0.143647	0.448942	Overview of leukocyte-intrinsic Hippo pathway functions WP4542	HIPPO pathway	0.40122	0.62822	Regulation of Microtubule Cytoskeleton WP2038	cell polarity and migration	0.167871	0.481839	NAD Metabolism in Oncogene-Induced Senescence and Mitochondrial Dysfunction-Associated Senescence WP5046		0.119948	0.589388
59	Prader-Willi and Angelman Syndrome WP3998		0.147991	0.511751	Photodynamic therapy-induced unfolded protein response WP3613		0.409801	0.622045	7q11.23 copy number variation syndrome WP4932		0.169894	0.416909	IL-4 signaling pathway WP395	inflammation	0.126747	-0.464133
60	Calcium Regulation in the Cardiac Cell WP536		0.153471	0.402536	The Overlap Between Signal Transduction Pathways that Contribute to a Range of LMNA Laminopathies WP4879		0.424589	0.560396	Apoptosis Modulation and Signaling WP1772	cell survival	0.169894	0.40762	Glycosylation and related congenital defects WP4521		0.126747	0.563487
61	Non-small cell lung cancer WP4255	Keywords: cancer, carcinoma, tumor	0.153471	0.416774	Nanoparticle-mediated activation of receptor signaling WP2643		0.438821	0.617162	Epithelial to mesenchymal transition in colorectal cancer WP4239	cell proliferation/cell fate and differentiation	0.169894	0.388386	Heart Development WP1591		0.126747	-0.556348
62	Type II interferon signaling (IFNG) WP619	inflammation	0.153471	0.513977	Mechanoregulation and pathology of YAP/TAZ via Hippo and non-Hippo mechanisms WP4534	HIPPO pathway	0.455345	0.573989	Electron Transport Chain (OXPHOS system in mitochondria) WP111	oxidative stress	0.169894	0.412193	Myometrial relaxation and contraction pathways WP289		0.127967	-0.374605
63	Hepatitis B infection WP4666		0.153726	0.364892	Notch Signaling WP268	NOTCH pathway	0.455345	0.576129	G1 to S cell cycle control WP45	cell proliferation/cell fate and differentiation	0.17119	0.444825	Selenium Micronutrient Network WP15		0.127967	-0.462479
64	Melanoma WP4685		0.158119	0.421406	Apoptosis WP254	cell survival	0.455345	0.524392	Bladder cancer WP2828	Keywords: cancer, carcinoma, tumor	0.173995	0.477159	Pathways in clear cell renal cell carcinoma WP4018	Keywords: cancer, carcinoma, tumor	0.127967	0.422427
65	EGFR Tyrosine Kinase Inhibitor Resistance WP4806	RTK/RAS/MAPK pathway	0.161267	0.406731	Cell cycle WP179	cell proliferation/cell fate and differentiation	0.455345	0.505288	Neovascularisation processes WP4331	angiogenesis	0.173995	0.512658	Osteoblast differentiation WP4787		0.127967	-0.420963
66	Netrin-UNC5B signaling pathway WP4747		0.163729	0.471662	Bladder cancer WP2828	Keywords: cancer, carcinoma, tumor	0.455345	0.574504	Nucleotide metabolism WP404	cell metabolism	0.183531	0.574544	Electron Transport Chain (OXPHOS system in mitochondria) WP111	oxidative stress	0.127967	0.41215
67	DNA Replication WP466	cell proliferation/cell fate and differentiation	0.163729	0.489438	Prolactin Signaling Pathway WP2037		0.455345	0.527471	Nanoparticle-mediated activation of receptor signaling WP2643		0.183531	0.518581	Fatty acid beta-oxidation WP143	cell metabolism	0.127967	-0.524892
68	Nucleotide metabolism WP404	cell metabolism	0.166146	0.560148	ErbB signaling pathway WP673	RTK/RAS/MAPK pathway	0.468434	0.515481	The influence of laminopathies on Wnt signaling WP4844	WNT pathway	0.183531	0.498835	Nucleotide metabolism WP404	cell metabolism	0.127967	0.614799
69	Hepatitis C and Hepatocellular Carcinoma WP3646	Keywords: cancer, carcinoma, tumor	0.166146	0.45914	Non-small cell lung cancer WP4255	Keywords: cancer, carcinoma, tumor	0.478578	0.528581	Cell cycle WP179	cell proliferation/cell fate and differentiation	0.183531	0.385419	Cytoplasmic Ribosomal Proteins WP477	cell proliferation/cell fate and differentiation	0.127967	0.386097
70	Mechanoregulation and pathology of YAP/TAZ via Hippo and non-Hippo mechanisms WP4534	HIPPO pathway	0.166146	0.458946	Thermogenesis WP4321		0.478578	0.514612	MAPK Signaling Pathway WP382	RTK/RAS/MAPK pathway	0.189962	0.345941	Lung fibrosis WP3624		0.127967	-0.487949
71	Lung fibrosis WP3624		0.166146	-0.36918	G13 Signaling Pathway WP524		0.522282	0.576048	EGF/EGFR signaling pathway WP437	RTK/RAS/MAPK pathway	0.192141	0.356396	Purine metabolism and related disorders WP4224	cell metabolism	0.140389	0.619781
72	Cardiac Progenitor Differentiation WP2406		0.180197	0.56449	Intracellular trafficking proteins involved in CMT neuropathy WP4856		0.522282	0.617687	Follicle Stimulating Hormone (FSH) signaling pathway WP2035		0.202661	0.529411	Vitamin B12 metabolism WP1533		0.140389	-0.52979
73	Toll-like Receptor Signaling Pathway WP75	inflammation	0.180197	0.404524	Cytosolic DNA-sensing pathway WP4655	genomic instability	0.522282	0.54162	Type I interferon induction and signaling during SARS-CoV-2 infection WP4868	inflammation	0.209181	0.509513	Oncostatin M Signaling Pathway WP2374	inflammation	0.143413	-0.415646
74	Bladder cancer WP2828	Keywords: cancer, carcinoma, tumor	0.181373	0.456613	Pancreatic adenocarcinoma pathway WP4263	Keywords: cancer, carcinoma, tumor	0.522803	0.506702	Sterol regulatory element-binding proteins (SREBP) signaling WP1982	cell metabolism	0.209363	-0.330069	VEGFA-VEGFR2 Signaling Pathway WP3888	angiogenesis	0.144144	-0.272795
75	Photodynamic therapy-induced AP-1 survival signaling. WP3611	cell survival	0.181373	0.452772	Tryptophan metabolism WP465		0.5256	-0.518624	Calcium Regulation in the Cardiac Cell WP536		0.209363	0.399516	Focal Adhesion WP306	cell polarity and migration	0.146697	-0.334644
76	Prolactin Signaling Pathway WP2037		0.181373	0.399807	Immune response to tuberculosis WP4197		0.5256	0.603688	Cell migration and invasion through p75NTR WP4561	cell polarity and migration	0.217185	0.560423	Nucleotide Excision Repair WP4753	genomic instability	0.146697	0.472559
77	7q11.23 copy number variation syndrome WP4932		0.181373	0.397153	Endochondral Ossification WP474		0.5256	0.566065	Melanoma WP4685		0.217185	0.416947	IL1 and megakaryocytes in obesity WP2865	inflammation	0.151681	-0.608865
78	Gastrin signaling pathway WP4659		0.182252	0.366619	Endochondral Ossification with Skeletal Dysplasias WP4808		0.5256	0.566065	TNF-alpha signaling pathway WP231	inflammation	0.219675	0.385676	Exercise-induced Circadian Regulation WP410		0.153075	-0.455403
79	Relationship between inflammation, COX-2 and EGFR WP4483	RTK/RAS/MAPK pathway	0.184053	0.549091	Tumor suppressor activity of SMARCB1 WP4204	Keywords: cancer, carcinoma, tumor	0.53238	0.606206	Hepatitis B infection WP4666		0.223038	0.360344	Hereditary leiomyomatosis and renal cell carcinoma pathway WP4206	Keywords: cancer, carcinoma, tumor	0.153439	0.57931
80	PDGF Pathway WP2526	angiogenesis	0.192504	0.455136	Small cell lung cancer WP4658	Keywords: cancer, carcinoma, tumor	0.53887	0.507031	Corticotropin-releasing hormone signaling pathway WP2355		0.226564	0.405489	Oxidative Stress WP408	oxidative stress	0.153439	-0.527081
81	Hypothesized Pathways in Pathogenesis of Cardiovascular Disease WP3668		0.193731	0.556358	Photodynamic therapy-induced NF-kB survival signaling WP3617	inflammation	0.563846	0.592347	PDGF Pathway WP2526	angiogenesis	0.22921	0.46134	IL17 signaling pathway WP2112	inflammation	0.155791	-0.537595
82	EGF/EGFR signaling pathway WP437	RTK/RAS/MAPK pathway	0.19567	0.344029	Hereditary leiomyomatosis and renal cell carcinoma pathway WP4206	Keywords: cancer, carcinoma, tumor	0.563846	0.615839	Prolactin Signaling Pathway WP2037		0.233284	0.40106	Acute viral myocarditis WP4298		0.157549	-0.399401
83	miRNA regulation of p53 pathway in prostate cancer WP3982	p53 pathway	0.19567	0.51529	Regulation of Actin Cytoskeleton WP51	cell polarity and migration	0.563846	0.485189	Prader-Willi and Angelman Syndrome WP3998		0.242196	0.492376	SREBF and miR33 in cholesterol and lipid homeostasis WP2011	cell metabolism	0.157549	-0.602172
84	Toll-like Receptor Signaling related to MyD88 WP3858	inflammation	0.200511	0.500663	IL1 and megakaryocytes in obesity WP2865	inflammation	0.563846	0.635227	Mechanoregulation and pathology of YAP/TAZ via Hippo and non-Hippo mechanisms WP4534	HIPPO pathway	0.242196	0.451737	Hematopoietic Stem Cell Differentiation WP2849		0.161953	-0.541117
85	Tryptophan metabolism WP465		0.200511	-0.465128	Brain-derived neurotrophic factor (BDNF) signaling pathway WP2380		0.600506	0.478837	TGF-beta receptor signaling in skeletal dysplasias WP4816	TGF-beta pathway	0.251256	0.447157	Fluoropyrimidine Activity WP1601		0.161953	0.53532
86	Endochondral Ossification WP474		0.203423	0.453398	Spinal Cord Injury WP2431		0.600506	0.504879	Methionine De Novo and Salvage Pathway WP3580		0.256116	0.537598	IL-1 signaling pathway WP195	inflammation	0.169873	-0.423137
87	Endochondral Ossification with Skeletal Dysplasias WP4808		0.203423	0.453398	IL-7 signaling pathway WP205	inflammation	0.600543	0.609006	FGFR3 signaling in chondrocyte proliferation and terminal differentiation WP4767		0.263436	0.522167	EGF/EGFR signaling pathway WP437	RTK/RAS/MAPK pathway	0.169873	-0.323962
88	Fluoropyrimidine Activity WP1601		0.213929	0.490732	Sudden Infant Death Syndrome (SIDS) Susceptibility Pathways WP706		0.600543	0.496033	Nonalcoholic fatty liver disease WP4396		0.265379	0.346099	Sterol regulatory element-binding proteins (SREBP) signaling WP1982	cell metabolism	0.170424	-0.401679
89	Selenium Micronutrient Network WP15		0.216169	-0.328611	Follicle Stimulating Hormone (FSH) signaling pathway WP2035		0.601812	0.590573	Effect of progerin on genes involved in Hutchinson-Gilford progeria syndrome WP4320		0.267874	0.520188	Tumor suppressor activity of SMARCB1 WP4204	Keywords: cancer, carcinoma, tumor	0.171331	0.544134
90	Alpha 6 Beta 4 signaling pathway WP244	cell polarity and migration	0.229712	0.460712	Copper homeostasis WP3286		0.601812	0.530749	miRNA regulation of p53 pathway in prostate cancer WP3982	p53 pathway	0.27273	0.511811	Integrin-mediated Cell Adhesion WP185	cell polarity and migration	0.171331	-0.378235
91	Host-pathogen interaction of human coronaviruses - interferon induction WP4880	inflammation	0.232093	0.452297	Common Pathways Underlying Drug Addiction WP2636		0.601812	0.589503	Thermogenesis WP4321		0.276981	0.381492	16p11.2 proximal deletion syndrome WP4949		0.171331	0.408572
92	Renin-angiotensin-aldosterone system (RAAS) WP4756		0.232093	0.490546	MET in type 1 papillary renal cell carcinoma WP4205	cell proliferation/cell fate and differentiation	0.601812	0.521601	Spinal Cord Injury WP2431		0.27739	0.389961	TYROBP causal network in microglia WP3945		0.17585	-0.470549
93	TGF-beta receptor signaling in skeletal dysplasias WP4816	TGF-beta pathway	0.241007	0.43206	Amyotrophic lateral sclerosis (ALS) WP2447		0.601812	0.565054	Integrin-mediated Cell Adhesion WP185	cell polarity and migration	0.279712	0.382427	Transcription factor regulation in adipogenesis WP3599		0.177575	-0.588012
94	Tumor suppressor activity of SMARCB1 WP4204	Keywords: cancer, carcinoma, tumor	0.247018	0.492774	RANKL/RANK signaling pathway WP2018	inflammation	0.601812	0.524158	Lung fibrosis WP3624		0.285564	-0.365259	MAPK Cascade WP422	RTK/RAS/MAPK pathway	0.182388	-0.481565
95	Cell migration and invasion through p75NTR WP4561	cell polarity and migration	0.24845	0.526108	Modulators of TCR signaling and T cell activation WP5072	inflammation	0.601812	0.538326	The Overlap Between Signal Transduction Pathways that Contribute to a Range of LMNA Laminopathies WP4879		0.285564	0.41782	Type I collagen synthesis in the context of Osteogenesis imperfecta WP4786		0.188059	0.51728
96	Integrin-mediated Cell Adhesion WP185	cell polarity and migration	0.251425	0.37459	Regulation of Microtubule Cytoskeleton WP2038	cell polarity and migration	0.601891	0.54175	Melatonin metabolism and effects WP3298		0.285564	0.477923	Physiological and pathological hypertrophy of the heart WP1528		0.188059	-0.526066
97	Nuclear Receptors Meta-Pathway WP2882		0.254243	0.316405	Notch Signaling Pathway Netpath WP61	NOTCH pathway	0.601891	0.522512	Pyrimidine metabolism WP4022	cell metabolism	0.285564	0.389017	Eicosanoid metabolism via lipooxygenases (LOX) WP4721	cell metabolism	0.188059	-0.570615
98	Simplified Interaction Map Between LOXL4 and Oxidative Stress Pathway WP3670	oxidative stress	0.261759	-0.447589	Effect of progerin on genes involved in Hutchinson-Gilford progeria syndrome WP4320		0.601891	0.594688	TGF-beta Receptor Signaling WP560	TGF-beta pathway	0.285564	0.438152	AGE/RAGE pathway WP2324	cell proliferation/cell fate and differentiation	0.188426	-0.398981
99	Melatonin metabolism and effects WP3298		0.262119	0.46691	p38 MAPK Signaling Pathway WP400	RTK/RAS/MAPK pathway	0.601891	0.547452	Ras signaling WP4223	RTK/RAS/MAPK pathway	0.297346	0.349497	Intracellular trafficking proteins involved in CMT neuropathy WP4856		0.188426	-0.532412
100	Trans-sulfuration and one-carbon metabolism WP2525	cell metabolism	0.262119	0.47522	SREBF and miR33 in cholesterol and lipid homeostasis WP2011	cell metabolism	0.613645	-0.482453	G13 Signaling Pathway WP524		0.297346	0.450136	CAMKK2 Pathway WP4874	cell proliferation/cell fate and differentiation	0.188426	-0.480119
101	Mitochondrial complex III assembly WP4921	oxidative stress	0.262119	0.528393	Androgen receptor signaling pathway WP138		0.613645	0.482352	Alpha 6 Beta 4 signaling pathway WP244	cell polarity and migration	0.297346	0.457474	Mitochondrial CIV Assembly WP4922	oxidative stress	0.188426	0.476466
102	Chromosomal and microsatellite instability in colorectal cancer WP4216	genomic instability	0.279159	0.376847	Oxidative Stress WP408	oxidative stress	0.613645	0.567769	Nephrotic syndrome WP4758		0.301496	0.459649	Melatonin metabolism and effects WP3298		0.188426	-0.497846
103	Regulation of Actin Cytoskeleton WP51	cell polarity and migration	0.279159	0.347314	Endoplasmic reticulum stress response in coronavirus infection WP4861	cell survival	0.613645	0.534081	Endoplasmic reticulum stress response in coronavirus infection WP4861	cell survival	0.301496	0.433282	One-carbon metabolism and related pathways WP3940	cell metabolism	0.189788	0.471514
104	Ras signaling WP4223	RTK/RAS/MAPK pathway	0.279159	0.341515	Calcium Regulation in the Cardiac Cell WP536		0.613645	0.489261	Toll-like Receptor Signaling Pathway WP75	inflammation	0.301496	0.386067	Senescence and Autophagy in Cancer WP615	cell survival	0.195087	0.360998
105	Effect of progerin on genes involved in Hutchinson-Gilford progeria syndrome WP4320		0.279159	0.492308	Glioblastoma signaling pathways WP2261		0.613645	0.49103	p53 transcriptional gene network WP4963	p53 pathway	0.301496	0.404733	Primary focal segmental glomerulosclerosis (FSGS) WP2572		0.197428	-0.406143
106	Pyrimidine metabolism WP4022	cell metabolism	0.279159	0.376575	Allograft Rejection WP2328		0.613645	-0.3572	Microglia Pathogen Phagocytosis Pathway WP3937		0.302742	-0.389102	IL-18 signaling pathway WP4754	inflammation	0.197428	-0.292095
107	Head and Neck Squamous Cell Carcinoma WP4674	Keywords: cancer, carcinoma, tumor	0.279159	0.372072	Pre-implantation embryo WP3527		0.613645	0.556872	Intracellular trafficking proteins involved in CMT neuropathy WP4856		0.302742	0.496854	Mitochondrial complex I assembly model OXPHOS system WP4324	oxidative stress	0.197428	0.417799
108	Extracellular vesicle-mediated signaling in recipient cells WP2870		0.28351	0.463732	Relationship between inflammation, COX-2 and EGFR WP4483	RTK/RAS/MAPK pathway	0.613645	0.602775	TNF related weak inducer of apoptosis (TWEAK) Signaling Pathway WP2036	cell survival	0.305764	0.428158	Serotonin Receptor 4/6/7 and NR3C Signaling WP734		0.213213	-0.555881
109	Glioblastoma signaling pathways WP2261		0.294917	0.369334	Joubert Syndrome WP4656		0.613645	-0.332788	Extracellular vesicle-mediated signaling in recipient cells WP2870		0.316197	0.471406	T-Cell antigen Receptor (TCR) pathway during Staphylococcus aureus infection WP3863		0.213213	-0.419376
110	TGF-beta Receptor Signaling WP560	TGF-beta pathway	0.301491	0.418046	IL-5 signaling pathway WP127		0.613645	0.542875	Trans-sulfuration and one-carbon metabolism WP2525	cell metabolism	0.316279	0.475787	Signal transduction through IL1R WP4496	inflammation	0.216603	-0.50367
111	DNA damage response (only ATM dependent) WP710	genomic instability	0.301491	0.351881	MECP2 and Associated Rett Syndrome WP3584		0.613645	0.516029	Neural Crest Cell Migration during Development WP4564		0.316279	0.491719	Kit receptor signaling pathway WP304	RTK/RAS/MAPK pathway	0.231942	-0.408618
112	Nephrotic syndrome WP4758		0.305696	0.441499	G1 to S cell cycle control WP45	cell proliferation/cell fate and differentiation	0.613645	0.50741	Neural Crest Differentiation WP2064		0.316279	0.410642	Wnt signaling pathway and pluripotency WP399	WNT pathway	0.247064	-0.366907
113	Synaptic Vesicle Pathway WP2267		0.31707	0.46519	TNF related weak inducer of apoptosis (TWEAK) Signaling Pathway WP2036	cell survival	0.613645	0.525758	Neural Crest Cell Migration in Cancer WP4565		0.316279	0.479134	EGFR Tyrosine Kinase Inhibitor Resistance WP4806	RTK/RAS/MAPK pathway	0.247064	-0.364756
114	Photodynamic therapy-induced NF-kB survival signaling WP3617	inflammation	0.31707	0.459932	Microglia Pathogen Phagocytosis Pathway WP3937		0.613645	-0.403841	DNA damage response (only ATM dependent) WP710	genomic instability	0.316279	0.357521	Alzheimer's disease WP2059		0.254964	-0.377686
115	Allograft Rejection WP2328		0.317462	-0.296979	Translation inhibitors in chronically activated PDGFRA cells WP4566	angiogenesis	0.613645	0.516199	Gastric Cancer Network 2 WP2363	Keywords: cancer, carcinoma, tumor	0.316279	0.472835	Nephrotic syndrome WP4758		0.254964	-0.456706
116	Pre-implantation embryo WP3527		0.319005	0.445037	Nucleotide-binding Oligomerization Domain (NOD) pathway WP1433		0.613645	0.559605	Proteoglycan biosynthesis WP4784		0.316279	0.524231	Structural Pathway of Interleukin 1 (IL-1) WP2637	inflammation	0.254964	-0.400072
117	Chemokine signaling pathway WP3929	inflammation	0.319095	0.349011	EGFR Tyrosine Kinase Inhibitor Resistance WP4806	RTK/RAS/MAPK pathway	0.613645	0.488733	Fragile X Syndrome WP4549		0.316279	0.359333	Photodynamic therapy-induced HIF-1 survival signaling WP3614	cell survival	0.27308	0.462742
118	TNF-alpha signaling pathway WP231	inflammation	0.320959	0.350292	Hippo-Yap signaling pathway WP4537	HIPPO pathway	0.618566	0.578405	Netrin-UNC5B signaling pathway WP4747		0.316279	0.433568	Endothelin Pathways WP2197		0.273221	-0.514748
119	TNF related weak inducer of apoptosis (TWEAK) Signaling Pathway WP2036	cell survival	0.334295	0.407609	Netrin-UNC5B signaling pathway WP4747		0.618566	0.530789	Zinc homeostasis WP3529		0.316279	0.482127	Angiopoietin Like Protein 8 Regulatory Pathway WP3915		0.282621	-0.318355
120	Epithelial to mesenchymal transition in colorectal cancer WP4239	cell proliferation/cell fate and differentiation	0.338817	0.340277	Type 2 papillary renal cell carcinoma WP4241	Keywords: cancer, carcinoma, tumor	0.618566	0.545918	Regulation of Actin Cytoskeleton WP51	cell polarity and migration	0.325182	0.346756	Vitamin D Receptor Pathway WP2877	cell proliferation/cell fate and differentiation	0.282621	-0.330978
121	NAD Metabolism in Oncogene-Induced Senescence and Mitochondrial Dysfunction-Associated Senescence WP5046		0.338817	0.469508	Synaptic Vesicle Pathway WP2267		0.618566	0.563645	Head and Neck Squamous Cell Carcinoma WP4674	Keywords: cancer, carcinoma, tumor	0.325182	0.371562	IL-7 signaling pathway WP205	inflammation	0.282621	-0.510866
122	Electron Transport Chain (OXPHOS system in mitochondria) WP111	oxidative stress	0.361575	0.355236	Ferroptosis WP4313	cell survival	0.618566	0.527739	p38 MAPK Signaling Pathway WP400	RTK/RAS/MAPK pathway	0.326717	0.433205	Signaling of Hepatocyte Growth Factor Receptor WP313	RTK/RAS/MAPK pathway	0.284426	-0.429109
123	Type I collagen synthesis in the context of Osteogenesis imperfecta WP4786		0.36431	0.443907	TGF-beta Signaling Pathway WP366	TGF-beta pathway	0.62072	0.458405	Purine metabolism and related disorders WP4224	cell metabolism	0.326717	0.519164	Phosphoinositides metabolism WP4971		0.284426	-0.433513
124	Corticotropin-releasing hormone signaling pathway WP2355		0.369905	0.361231	Fragile X Syndrome WP4549		0.625471	0.472376	SREBF and miR33 in cholesterol and lipid homeostasis WP2011	cell metabolism	0.326717	-0.451709	Calcium Regulation in the Cardiac Cell WP536		0.28445	-0.348598
125	p53 transcriptional gene network WP4963	p53 pathway	0.369905	0.376658	STING pathway in Kawasaki-like disease and COVID-19 WP4961		0.628221	0.583782	Mitochondrial complex I assembly model OXPHOS system WP4324	oxidative stress	0.326717	0.394516	Circadian rhythm related genes WP3594		0.285014	-0.304239
126	Folate Metabolism WP176	cell metabolism	0.369905	-0.299891	Complement and Coagulation Cascades WP558		0.628221	0.539159	Glioblastoma signaling pathways WP2261		0.326717	0.369588	Regulatory circuits of the STAT3 signaling pathway WP4538	RTK/RAS/MAPK pathway	0.285014	-0.392508
127	G13 Signaling Pathway WP524		0.369905	0.41429	Methionine De Novo and Salvage Pathway WP3580		0.631199	0.581592	Aryl Hydrocarbon Receptor Pathway WP2873	RTK/RAS/MAPK pathway	0.326717	0.456504	Mitochondrial complex III assembly WP4921	oxidative stress	0.286432	0.543308
128	Neural Crest Cell Migration in Cancer WP4565		0.369905	0.449542	Unfolded protein response WP4925	cell proliferation/cell fate and differentiation	0.631199	0.553312	Chromosomal and microsatellite instability in colorectal cancer WP4216	genomic instability	0.335691	0.371358	Intraflagellar transport proteins binding to dynein WP4532		0.288858	-0.476312
129	Neural Crest Cell Migration during Development WP4564		0.369905	0.459352	Exercise-induced Circadian Regulation WP410		0.631199	0.512233	TGF-beta Signaling Pathway WP366	TGF-beta pathway	0.337325	0.334048	Serotonin Receptor 2 and ELK-SRF/GATA4 signaling WP732		0.289296	-0.521415
130	Host-pathogen interaction of human coronaviruses - apoptosis WP4864	cell survival	0.369905	0.484495	NAD Metabolism in Oncogene-Induced Senescence and Mitochondrial Dysfunction-Associated Senescence WP5046		0.631199	0.565115	IL1 and megakaryocytes in obesity WP2865	inflammation	0.362553	0.508879	Eukaryotic Transcription Initiation WP405	cell proliferation/cell fate and differentiation	0.289296	0.42177
131	Common Pathways Underlying Drug Addiction WP2636		0.369905	0.453338	Base Excision Repair WP4752	genomic instability	0.632951	0.53293	Brain-derived neurotrophic factor (BDNF) signaling pathway WP2380		0.362723	0.335984	Host-pathogen interaction of human coronaviruses - MAPK signaling WP4877	RTK/RAS/MAPK pathway	0.289296	-0.428218
132	Proteoglycan biosynthesis WP4784		0.376974	0.489968	Aryl Hydrocarbon Receptor Netpath WP2586	RTK/RAS/MAPK pathway	0.632951	0.518322	Mitochondrial complex III assembly WP4921	oxidative stress	0.362723	0.507372	7q11.23 copy number variation syndrome WP4932		0.289296	0.361137
133	Kisspeptin/kisspeptin receptor system in the ovary WP4871		0.376974	0.446719	Selenium Micronutrient Network WP15		0.632951	0.506824	Relationship between inflammation, COX-2 and EGFR WP4483	RTK/RAS/MAPK pathway	0.362723	0.499498	Folate Metabolism WP176	cell metabolism	0.289296	-0.402287
134	Complement and Coagulation Cascades WP558		0.377058	0.421592	Chromosomal and microsatellite instability in colorectal cancer WP4216	genomic instability	0.651852	0.478665	Type 2 papillary renal cell carcinoma WP4241	Keywords: cancer, carcinoma, tumor	0.362723	0.439497	NO/cGMP/PKG mediated Neuroprotection WP4008		0.289296	-0.518681
135	Unfolded protein response WP4925	cell proliferation/cell fate and differentiation	0.377058	0.440318	Type I collagen synthesis in the context of Osteogenesis imperfecta WP4786		0.652697	0.543174	Hereditary leiomyomatosis and renal cell carcinoma pathway WP4206	Keywords: cancer, carcinoma, tumor	0.369519	0.483323	Neurodegeneration with brain iron accumulation (NBIA) subtypes pathway WP4577		0.289296	0.402972
136	Mitochondrial complex I assembly model OXPHOS system WP4324	oxidative stress	0.377058	0.373987	Host-pathogen interaction of human coronaviruses - apoptosis WP4864	cell survival	0.652697	0.579299	Oncostatin M Signaling Pathway WP2374	inflammation	0.374578	0.371927	Proximal tubule transport WP4917		0.292371	-0.464189
137	SARS-CoV-2 innate immunity evasion and cell-specific immune response WP5039		0.38307	0.376379	miRNA regulation of prostate cancer signaling pathways WP3981	Keywords: cancer, carcinoma, tumor	0.671944	0.527489	Fluoropyrimidine Activity WP1601		0.374578	0.45343	Angiogenesis WP1539	angiogenesis	0.295187	-0.515461
138	Oxidative phosphorylation WP623	oxidative stress	0.385132	0.395447	DNA damage response (only ATM dependent) WP710	genomic instability	0.671944	0.461065	PPAR-alpha pathway WP2878	cell proliferation/cell fate and differentiation	0.374578	0.502704	Wnt/beta-catenin signaling pathway in leukemia WP3658	WNT pathway	0.299405	-0.496841
139	Neural Crest Differentiation WP2064		0.388008	0.379399	EGF/EGFR signaling pathway WP437	RTK/RAS/MAPK pathway	0.671944	0.443398	SARS-CoV-2 innate immunity evasion and cell-specific immune response WP5039		0.374966	0.386825	Endometrial cancer WP4155	Keywords: cancer, carcinoma, tumor	0.308776	-0.364617
140	PPAR-alpha pathway WP2878	cell proliferation/cell fate and differentiation	0.388008	0.483752	FGFR3 signaling in chondrocyte proliferation and terminal differentiation WP4767		0.671944	0.557381	NAD Metabolism in Oncogene-Induced Senescence and Mitochondrial Dysfunction-Associated Senescence WP5046		0.37913	0.466748	Parkin-Ubiquitin Proteasomal System pathway WP2359	cell proliferation/cell fate and differentiation	0.31019	0.37565
141	TGF-beta Signaling Pathway WP366	TGF-beta pathway	0.388008	0.318689	Corticotropin-releasing hormone signaling pathway WP2355		0.671944	0.475512	Vitamin B12 metabolism WP1533		0.37913	-0.364208	Prostaglandin Synthesis and Regulation WP98	inflammation	0.319903	-0.444438
142	Envelope proteins and their potential roles in EDMD physiopathology WP4535		0.388008	0.393137	22q11.2 copy number variation syndrome WP4657		0.672799	0.474018	Translation inhibitors in chronically activated PDGFRA cells WP4566	angiogenesis	0.37913	0.392911	Oxidative Damage WP3941	oxidative stress	0.321706	-0.412735
143	p38 MAPK Signaling Pathway WP400	RTK/RAS/MAPK pathway	0.388008	0.403208	Toll-like Receptor Signaling related to MyD88 WP3858	inflammation	0.672799	0.542497	DNA IR-double strand breaks and cellular response via ATM WP3959	genomic instability	0.37913	0.39259	Tryptophan metabolism WP465		0.321706	-0.504798
144	Prostaglandin Synthesis and Regulation WP98	inflammation	0.388008	0.426352	Initiation of transcription and translation elongation at the HIV-1 LTR WP3414		0.672799	0.523337	Serotonin Receptor 2 and ELK-SRF/GATA4 signaling WP732		0.379195	0.491327	Translation Factors WP107	cell proliferation/cell fate and differentiation	0.332132	0.380906
145	Base Excision Repair WP4752	genomic instability	0.397129	0.41072	Hepatitis B infection WP4666		0.672799	0.445575	Host-pathogen interaction of human coronaviruses - interferon induction WP4880	inflammation	0.383267	0.418587	Thyroid stimulating hormone (TSH) signaling pathway WP2032		0.343171	-0.360642
146	Translation inhibitors in chronically activated PDGFRA cells WP4566	angiogenesis	0.397129	0.378582	Eicosanoid metabolism via lipooxygenases (LOX) WP4721	cell metabolism	0.672799	0.56765	Toll-like Receptor Signaling related to MyD88 WP3858	inflammation	0.385661	0.452573	Nucleotide-binding Oligomerization Domain (NOD) pathway WP1433		0.343171	-0.442362
147	RANKL/RANK signaling pathway WP2018	inflammation	0.397129	0.37286	Alpha 6 Beta 4 signaling pathway WP244	cell polarity and migration	0.672799	0.518162	Vitamin D in inflammatory diseases WP4482	inflammation	0.389426	0.473643	Wnt signaling WP428	WNT pathway	0.346609	-0.335739
148	Non-genomic actions of 1,25 dihydroxyvitamin D3 WP4341	cell proliferation/cell fate and differentiation	0.398021	0.372291	Cell migration and invasion through p75NTR WP4561	cell polarity and migration	0.672799	0.56709	RANKL/RANK signaling pathway WP2018	inflammation	0.389426	0.383617	NAD+ biosynthetic pathways WP3645		0.346609	0.50835
149	Methionine De Novo and Salvage Pathway WP3580		0.398021	0.464199	Neovascularisation processes WP4331	angiogenesis	0.672799	0.525494	EGFR Tyrosine Kinase Inhibitor Resistance WP4806	RTK/RAS/MAPK pathway	0.400845	0.35516	Proteasome Degradation WP183	cell proliferation/cell fate and differentiation	0.355022	0.361199
150	The influence of laminopathies on Wnt signaling WP4844	WNT pathway	0.398875	0.411699	Leptin signaling pathway WP2034	cell metabolism	0.672799	0.466357	Oxidative phosphorylation WP623	oxidative stress	0.400845	0.399332	Apoptosis-related network due to altered Notch3 in ovarian cancer WP2864	NOTCH pathway	0.357255	0.381196
151	Integrated Cancer Pathway WP1971	Keywords: cancer, carcinoma, tumor	0.398875	0.390866	Thymic Stromal LymphoPoietin (TSLP) Signaling Pathway WP2203		0.672799	0.506771	Common Pathways Underlying Drug Addiction WP2636		0.400845	0.452555	miRNA regulation of p53 pathway in prostate cancer WP3982	p53 pathway	0.361565	0.470596
152	Zinc homeostasis WP3529		0.398875	0.439035	DNA Replication WP466	cell proliferation/cell fate and differentiation	0.672799	0.518197	Thymic Stromal LymphoPoietin (TSLP) Signaling Pathway WP2203		0.404564	0.406905	Fibrin Complement Receptor 3 Signaling Pathway WP4136		0.361565	-0.435641
153	Signal transduction through IL1R WP4496	inflammation	0.398875	0.433976	Complement system WP2806		0.672799	0.485147	Complement and Coagulation Cascades WP558		0.404564	0.421763	Overview of leukocyte-intrinsic Hippo pathway functions WP4542	HIPPO pathway	0.379013	-0.437189
154	DNA IR-double strand breaks and cellular response via ATM WP3959	genomic instability	0.398875	0.375495	Purine metabolism and related disorders WP4224	cell metabolism	0.672799	0.569857	Hypothesized Pathways in Pathogenesis of Cardiovascular Disease WP3668		0.444129	0.482343	Metapathway biotransformation Phase I and II WP702		0.379013	-0.332239
155	Regulation of toll-like receptor signaling pathway WP1449	inflammation	0.401965	0.326107	Pathways Regulating Hippo Signaling WP4540	HIPPO pathway	0.674244	0.478308	Nanomaterial induced apoptosis WP2507	cell survival	0.444129	0.473969	Vitamin D in inflammatory diseases WP4482	inflammation	0.387909	-0.466576
156	Fragile X Syndrome WP4549		0.401965	0.330916	Type I interferon induction and signaling during SARS-CoV-2 infection WP4868	inflammation	0.674244	0.526939	Endoderm differentiation WP2853		0.444129	0.327399	Fatty Acid Biosynthesis WP357		0.388343	-0.452765
157	miRNA regulation of prostate cancer signaling pathways WP3981	Keywords: cancer, carcinoma, tumor	0.404313	0.408009	Integrin-mediated Cell Adhesion WP185	cell polarity and migration	0.674244	0.460153	Chemokine signaling pathway WP3929	inflammation	0.444129	0.332688	Netrin-UNC5B signaling pathway WP4747		0.388734	-0.389944
158	Wnt Signaling Pathway WP363	WNT pathway	0.409393	0.376232	4-hydroxytamoxifen, Dexamethasone, and Retinoic Acids Regulation of p27 Expression WP3879	RTK/RAS/MAPK pathway	0.674244	0.559286	SARS coronavirus and innate immunity WP4912		0.448063	0.472186	Histone Modifications WP2369	genomic instability	0.388734	0.40245
159	Structural Pathway of Interleukin 1 (IL-1) WP2637	inflammation	0.409393	0.368495	DNA IR-double strand breaks and cellular response via ATM WP3959	genomic instability	0.674244	0.486421	Mitochondrial LC-Fatty Acid Beta-Oxidation WP368	cell metabolism	0.448896	-0.395771	NRF2 pathway WP2884	oxidative stress	0.388734	0.3232
160	Ciliary landscape WP4352	cell polarity and migration	0.409393	-0.198224	Prader-Willi and Angelman Syndrome WP3998		0.674244	0.521483	16p11.2 distal deletion syndrome WP4950		0.46282	0.443281	Epithelial to mesenchymal transition in colorectal cancer WP4239	cell proliferation/cell fate and differentiation	0.388734	0.315174
161	Cytosolic DNA-sensing pathway WP4655	genomic instability	0.409393	0.364163	Acute viral myocarditis WP4298		0.674244	0.465863	Insulin Signaling WP481		0.46282	0.306655	Effect of progerin on genes involved in Hutchinson-Gilford progeria syndrome WP4320		0.389378	0.467247
162	MAPK Cascade WP422	RTK/RAS/MAPK pathway	0.409393	0.401926	Extracellular vesicle-mediated signaling in recipient cells WP2870		0.674244	0.524212	DNA IR-damage and cellular response via ATR WP4016	genomic instability	0.46282	0.360224	MicroRNAs in cardiomyocyte hypertrophy WP1544		0.400262	-0.332419
163	IL1 and megakaryocytes in obesity WP2865	inflammation	0.409393	0.46979	Regulation of apoptosis by parathyroid hormone-related protein WP3872	cell survival	0.674244	0.547121	Synaptic Vesicle Pathway WP2267		0.467835	0.430895	Relationship between inflammation, COX-2 and EGFR WP4483	RTK/RAS/MAPK pathway	0.400262	0.488664
164	SARS coronavirus and innate immunity WP4912		0.409393	0.461633	Neural Crest Cell Migration during Development WP4564		0.674244	0.537915	Structural Pathway of Interleukin 1 (IL-1) WP2637	inflammation	0.467835	0.369227	Splicing factor NOVA regulated synaptic proteins WP4148		0.402444	-0.42657
165	IL-1 signaling pathway WP195	inflammation	0.410157	0.361765	Striated Muscle Contraction Pathway WP383		0.674244	0.562531	Notch Signaling Pathway Netpath WP61	NOTCH pathway	0.468848	0.366904	Striated Muscle Contraction Pathway WP383		0.402444	-0.482202
166	Endoplasmic reticulum stress response in coronavirus infection WP4861	cell survival	0.410157	0.381915	Ras signaling WP4223	RTK/RAS/MAPK pathway	0.680617	0.440752	Acute viral myocarditis WP4298		0.468848	0.345467	Factors and pathways affecting insulin-like growth factor (IGF1)-Akt signaling WP3850	RTK/RAS/MAPK pathway	0.403812	0.410759
167	Leptin signaling pathway WP2034	cell metabolism	0.413833	0.337414	Association Between Physico-Chemical Features and Toxicity Associated Pathways WP3680		0.680617	0.476691	Regulation of apoptosis by parathyroid hormone-related protein WP3872	cell survival	0.468848	0.450485	Non-small cell lung cancer WP4255	Keywords: cancer, carcinoma, tumor	0.404253	0.342469
168	Amino Acid metabolism WP3925	cell metabolism	0.414607	0.346229	PDGF Pathway WP2526	angiogenesis	0.680617	0.495762	Interleukin-11 Signaling Pathway WP2332	inflammation	0.468848	0.383773	Pathways Regulating Hippo Signaling WP4540	HIPPO pathway	0.404413	-0.342386
169	NRF2 pathway WP2884	oxidative stress	0.426189	0.325118	One-carbon metabolism and related pathways WP3940	cell metabolism	0.687845	0.497545	One-carbon metabolism and related pathways WP3940	cell metabolism	0.468848	0.393769	Leptin signaling pathway WP2034	cell metabolism	0.404413	-0.319931
170	Thermogenesis WP4321		0.426189	0.331114	Metapathway biotransformation Phase I and II WP702		0.687845	-0.303321	Selenium Micronutrient Network WP15		0.468848	0.372111	Regulation of apoptosis by parathyroid hormone-related protein WP3872	cell survival	0.404413	0.46626
171	Interleukin-11 Signaling Pathway WP2332	inflammation	0.428228	0.377221	Envelope proteins and their potential roles in EDMD physiopathology WP4535		0.687845	0.489823	Prostaglandin Synthesis and Regulation WP98	inflammation	0.468848	0.414797	Endochondral Ossification WP474		0.404413	-0.381356
172	Type 2 papillary renal cell carcinoma WP4241	Keywords: cancer, carcinoma, tumor	0.428228	0.401781	Oxidative Damage WP3941	oxidative stress	0.687845	-0.345456	Vitamin A and carotenoid metabolism WP716		0.468848	-0.36545	Endochondral Ossification with Skeletal Dysplasias WP4808		0.404413	-0.381356
173	SREBF and miR33 in cholesterol and lipid homeostasis WP2011	cell metabolism	0.428228	-0.367901	Thyroid stimulating hormone (TSH) signaling pathway WP2032		0.687845	0.469768	Cytosolic DNA-sensing pathway WP4655	genomic instability	0.472526	0.36205	miRNA regulation of prostate cancer signaling pathways WP3981	Keywords: cancer, carcinoma, tumor	0.404426	-0.399312
174	Transcription co-factors SKI and SKIL protein partners WP4533		0.428228	0.461295	miRNA regulation of p53 pathway in prostate cancer WP3982	p53 pathway	0.694409	0.528423	4-hydroxytamoxifen, Dexamethasone, and Retinoic Acids Regulation of p27 Expression WP3879	RTK/RAS/MAPK pathway	0.474745	0.460049	Oxidative phosphorylation WP623	oxidative stress	0.411846	0.38291
175	Nonalcoholic fatty liver disease WP4396		0.430836	0.302895	Melanoma WP4685		0.694409	0.462	Interferon type I signaling pathways WP585	inflammation	0.477127	0.36279	Canonical and non-canonical Notch signaling WP3845	NOTCH pathway	0.425193	-0.46189
176	Genes controlling nephrogenesis WP4823		0.431283	0.446092	MAPK Signaling Pathway WP382	RTK/RAS/MAPK pathway	0.694409	0.424353	Kisspeptin/kisspeptin receptor system in the ovary WP4871		0.48591	0.422836	Ectoderm Differentiation WP2858		0.431671	-0.297345
177	Amyotrophic lateral sclerosis (ALS) WP2447		0.445332	0.397205	CAMKK2 Pathway WP4874	cell proliferation/cell fate and differentiation	0.694409	0.50111	MET in type 1 papillary renal cell carcinoma WP4205	cell proliferation/cell fate and differentiation	0.4872	0.357513	Type II interferon signaling (IFNG) WP619	inflammation	0.431671	-0.409888
178	Modulators of TCR signaling and T cell activation WP5072	inflammation	0.446978	0.370457	NRF2 pathway WP2884	oxidative stress	0.694409	0.444185	Transcription co-factors SKI and SKIL protein partners WP4533		0.4872	0.462089	Androgen receptor signaling pathway WP138		0.456087	-0.300468
179	EPO Receptor Signaling WP581		0.449465	0.414191	Wnt Signaling Pathway WP363	WNT pathway	0.694409	0.477559	MECP2 and Associated Rett Syndrome WP3584		0.4872	0.363176	Vitamin A and carotenoid metabolism WP716		0.465806	-0.430543
180	Insulin Signaling WP481		0.449465	0.297839	SARS-CoV-2 mitochondrial interactions WP5038		0.694409	0.517167	Base Excision Repair WP4752	genomic instability	0.4872	0.395386	Glycerolipids and Glycerophospholipids WP4722		0.466428	-0.442956
181	Aryl Hydrocarbon Receptor Pathway WP2873	RTK/RAS/MAPK pathway	0.449465	0.402142	IL-1 signaling pathway WP195	inflammation	0.694409	0.467997	Pre-implantation embryo WP3527		0.4872	0.404454	Interactome of polycomb repressive complex 2 (PRC2) WP2916		0.467077	0.47263
182	Acute viral myocarditis WP4298		0.456951	0.334039	Zinc homeostasis WP3529		0.694409	0.519715	Amyotrophic lateral sclerosis (ALS) WP2447		0.487481	0.400862	Aryl Hydrocarbon Receptor Netpath WP2586	RTK/RAS/MAPK pathway	0.47213	-0.361067
183	Regucalcin in proximal tubule epithelial kidney cells WP4838		0.456951	0.411193	Kit receptor signaling pathway WP304	RTK/RAS/MAPK pathway	0.694409	0.472138	Nuclear Receptors Meta-Pathway WP2882		0.488575	0.287002	Fas ligand pathway and stress induction of heat shock proteins WP314		0.47213	0.370044
184	Complement system WP2806		0.456951	0.351667	Neural Crest Cell Migration in Cancer WP4565		0.694409	0.515822	Overview of leukocyte-intrinsic Hippo pathway functions WP4542	HIPPO pathway	0.489806	0.414337	PDGFR-beta pathway WP3972	angiogenesis	0.484225	-0.392981
185	Novel intracellular components of RIG-I-like receptor (RLR) pathway WP3865		0.456951	0.351627	Host-pathogen interaction of human coronaviruses - interferon induction WP4880	inflammation	0.700007	0.490322	Modulators of TCR signaling and T cell activation WP5072	inflammation	0.48981	0.372412	IL-5 signaling pathway WP127		0.504685	-0.3696
186	Hair Follicle Development: Organogenesis - Part 2 of 3 WP2839		0.465381	0.442194	IL17 signaling pathway WP2112	inflammation	0.700007	0.513719	Pathways Regulating Hippo Signaling WP4540	HIPPO pathway	0.48981	0.348684	1q21.1 copy number variation syndrome WP4905		0.504685	0.438571
187	Interactome of polycomb repressive complex 2 (PRC2) WP2916		0.476672	0.446609	Nucleotide metabolism WP404	cell metabolism	0.70851	0.536369	Breast cancer pathway WP4262	Keywords: cancer, carcinoma, tumor	0.48981	0.315906	Estrogen signaling pathway WP712		0.518639	-0.415693
188	Purine metabolism and related disorders WP4224	cell metabolism	0.476693	0.445763	TGF-beta receptor signaling in skeletal dysplasias WP4816	TGF-beta pathway	0.70851	0.476802	Type I collagen synthesis in the context of Osteogenesis imperfecta WP4786		0.492077	0.408479	Hepatitis B infection WP4666		0.51927	-0.273423
189	Mesodermal commitment pathway WP2857		0.476693	0.312564	Oncostatin M Signaling Pathway WP2374	inflammation	0.712699	0.454478	DNA Replication WP466	cell proliferation/cell fate and differentiation	0.492077	0.394035	Glutathione metabolism WP100		0.525814	0.455465
190	IL-5 signaling pathway WP127		0.483597	0.378048	Novel intracellular components of RIG-I-like receptor (RLR) pathway WP3865		0.720017	0.462236	Sudden Infant Death Syndrome (SIDS) Susceptibility Pathways WP706		0.492077	0.325599	TCA Cycle and Deficiency of Pyruvate Dehydrogenase complex (PDHc) WP2453	cell metabolism	0.540983	0.451737
191	Cardiac Hypertrophic Response WP2795		0.492778	0.354359	Genes controlling nephrogenesis WP4823		0.720855	0.527358	Non-genomic actions of 1,25 dihydroxyvitamin D3 WP4341	cell proliferation/cell fate and differentiation	0.495987	0.354775	FGFR3 signaling in chondrocyte proliferation and terminal differentiation WP4767		0.554843	-0.406425
192	miRNA regulation of DNA damage response WP1530	genomic instability	0.498879	0.337121	Structural Pathway of Interleukin 1 (IL-1) WP2637	inflammation	0.738668	0.461166	3q29 copy number variation syndrome WP4906		0.496628	-0.279226	Cardiac Hypertrophic Response WP2795		0.55505	-0.33375
193	Overview of leukocyte-intrinsic Hippo pathway functions WP4542	HIPPO pathway	0.498879	0.396918	Signaling of Hepatocyte Growth Factor Receptor WP313	RTK/RAS/MAPK pathway	0.738668	0.478522	TCA Cycle (aka Krebs or citric acid cycle) WP78	cell metabolism	0.496628	0.433981	TGF-beta receptor signaling in skeletal dysplasias WP4816	TGF-beta pathway	0.55505	-0.3397
194	Inhibition of exosome biogenesis and secretion by Manumycin A in CRPC cells WP4301		0.501994	0.425804	TCA Cycle (aka Krebs or citric acid cycle) WP78	cell metabolism	0.738701	0.517632	Envelope proteins and their potential roles in EDMD physiopathology WP4535		0.496628	0.370953	Photodynamic therapy-induced AP-1 survival signaling. WP3611	cell survival	0.55505	-0.342115
195	Adipogenesis WP236		0.501994	0.30889	Breast cancer pathway WP4262	Keywords: cancer, carcinoma, tumor	0.740532	0.430682	Nucleotide-binding Oligomerization Domain (NOD) pathway WP1433		0.497208	0.404905	BDNF-TrkB Signaling WP3676		0.55505	-0.375507
196	Signaling of Hepatocyte Growth Factor Receptor WP313	RTK/RAS/MAPK pathway	0.504436	0.367122	Sterol regulatory element-binding proteins (SREBP) signaling WP1982	cell metabolism	0.747977	-0.298506	Regulation of toll-like receptor signaling pathway WP1449	inflammation	0.517261	0.311336	3q29 copy number variation syndrome WP4906		0.55505	-0.327071
197	Apoptosis Modulation by HSP70 WP384	cell survival	0.504436	0.417977	Chemokine signaling pathway WP3929	inflammation	0.747977	0.43126	TYROBP causal network in microglia WP3945		0.519727	0.375325	Toll-like Receptor Signaling Pathway WP75	inflammation	0.55505	-0.302181
198	DNA IR-damage and cellular response via ATR WP4016	genomic instability	0.504436	0.334666	Inhibition of exosome biogenesis and secretion by Manumycin A in CRPC cells WP4301		0.748668	0.516975	Unfolded protein response WP4925	cell proliferation/cell fate and differentiation	0.519727	0.403357	TGF-beta Receptor Signaling WP560	TGF-beta pathway	0.561804	-0.33973
199	Brain-derived neurotrophic factor (BDNF) signaling pathway WP2380		0.504436	0.299231	Toll-like Receptor Signaling Pathway WP75	inflammation	0.748668	0.441808	Oxidative Damage WP3941	oxidative stress	0.519727	-0.299086	MET in type 1 papillary renal cell carcinoma WP4205	cell proliferation/cell fate and differentiation	0.563211	-0.318495
200	The Overlap Between Signal Transduction Pathways that Contribute to a Range of LMNA Laminopathies WP4879		0.50725	0.341684	Hair Follicle Development: Organogenesis - Part 2 of 3 WP2839		0.748668	0.520085	Leptin signaling pathway WP2034	cell metabolism	0.519727	0.324439	TP53 network WP1742	p53 pathway	0.5767	0.438976
201	Proximal tubule transport WP4917		0.50725	-0.300748	TGF-beta Receptor Signaling WP560	TGF-beta pathway	0.748668	0.465745	Renin-angiotensin-aldosterone system (RAAS) WP4756		0.524601	0.404923	TCA Cycle (aka Krebs or citric acid cycle) WP78	cell metabolism	0.576791	0.416414
202	Regulatory circuits of the STAT3 signaling pathway WP4538	RTK/RAS/MAPK pathway	0.50725	0.343743	Prostaglandin Synthesis and Regulation WP98	inflammation	0.748668	0.487867	IL-1 signaling pathway WP195	inflammation	0.524601	0.344358	Modulators of TCR signaling and T cell activation WP5072	inflammation	0.583284	-0.332692
203	Wnt signaling WP428	WNT pathway	0.510629	0.317275	Glutathione metabolism WP100		0.754466	0.521127	Novel intracellular components of RIG-I-like receptor (RLR) pathway WP3865		0.524601	0.345525	miRNA regulation of DNA damage response WP1530	genomic instability	0.583284	0.319104
204	16p11.2 distal deletion syndrome WP4950		0.510629	0.403125	Serotonin Receptor 4/6/7 and NR3C Signaling WP734		0.754466	0.515556	Fibrin Complement Receptor 3 Signaling Pathway WP4136		0.531208	0.395665	Neural Crest Cell Migration during Development WP4564		0.594217	0.39913
205	Oxysterols derived from cholesterol WP4545		0.510629	-0.309951	Angiogenesis WP1539	angiogenesis	0.754466	0.515475	Regulatory circuits of the STAT3 signaling pathway WP4538	RTK/RAS/MAPK pathway	0.535461	0.348239	Interleukin-11 Signaling Pathway WP2332	inflammation	0.595607	-0.331958
206	Thymic Stromal LymphoPoietin (TSLP) Signaling Pathway WP2203		0.510629	0.360272	Renin-angiotensin-aldosterone system (RAAS) WP4756		0.754466	0.492336	Serotonin Receptor 4/6/7 and NR3C Signaling WP734		0.542642	0.431797	Nanomaterial induced apoptosis WP2507	cell survival	0.595607	0.423782
207	Estrogen signaling pathway WP712		0.510629	0.407753	Interferon type I signaling pathways WP585	inflammation	0.754466	0.449604	Copper homeostasis WP3286		0.54371	0.347879	Hypothesized Pathways in Pathogenesis of Cardiovascular Disease WP3668		0.597327	-0.416255
208	Wnt signaling pathway and pluripotency WP399	WNT pathway	0.510629	0.318806	Nanomaterial induced apoptosis WP2507	cell survival	0.754466	0.513669	Signal transduction through IL1R WP4496	inflammation	0.546231	0.39893	Prolactin Signaling Pathway WP2037		0.59927	-0.292262
209	Circadian rhythm related genes WP3594		0.510629	0.289638	Gastric Cancer Network 2 WP2363	Keywords: cancer, carcinoma, tumor	0.754466	0.487428	Mesodermal commitment pathway WP2857		0.561237	0.305462	Photodynamic therapy-induced NF-kB survival signaling WP3617	inflammation	0.606344	-0.367491
210	Oncostatin M Signaling Pathway WP2374	inflammation	0.513801	0.324647	IL-6 signaling pathway WP364	inflammation	0.754466	0.462128	IL-5 signaling pathway WP127		0.561237	0.369076	Mesodermal commitment pathway WP2857		0.606344	-0.274737
211	MET in type 1 papillary renal cell carcinoma WP4205	cell proliferation/cell fate and differentiation	0.515587	0.334579	Target Of Rapamycin (TOR) Signaling WP1471	PI3K pathway	0.756272	0.467877	Folate Metabolism WP176	cell metabolism	0.561237	0.351211	The Overlap Between Signal Transduction Pathways that Contribute to a Range of LMNA Laminopathies WP4879		0.618211	-0.310506
212	SARS-CoV-2 mitochondrial interactions WP5038		0.516084	0.390209	Phosphoinositides metabolism WP4971		0.763598	-0.32325	Integrated Cancer Pathway WP1971	Keywords: cancer, carcinoma, tumor	0.561237	0.357171	Mitochondrial Gene Expression WP391		0.62942	0.421108
213	Serotonin Receptor 2 and ELK-SRF/GATA4 signaling WP732		0.530764	0.417638	NO/cGMP/PKG mediated Neuroprotection WP4008		0.768988	0.507697	Eukaryotic Transcription Initiation WP405	cell proliferation/cell fate and differentiation	0.567589	0.353563	Glioblastoma signaling pathways WP2261		0.62942	-0.284802
214	Metapathway biotransformation Phase I and II WP702		0.530764	-0.227566	White fat cell differentiation WP4149		0.768988	0.482383	Regucalcin in proximal tubule epithelial kidney cells WP4838		0.568188	0.391724	Bladder cancer WP2828	Keywords: cancer, carcinoma, tumor	0.62942	0.336651
215	Parkinson's disease pathway WP2371		0.530764	0.382745	Mesodermal commitment pathway WP2857		0.783379	0.419572	Amino Acid metabolism WP3925	cell metabolism	0.568188	0.321831	Endoderm differentiation WP2853		0.62942	0.276066
216	Pathways Regulating Hippo Signaling WP4540	HIPPO pathway	0.538324	0.325045	Integrated Cancer Pathway WP1971	Keywords: cancer, carcinoma, tumor	0.803954	0.450803	Apoptosis Modulation by HSP70 WP384	cell survival	0.568188	0.409977	Pre-implantation embryo WP3527		0.62942	0.360943
217	Intracellular trafficking proteins involved in CMT neuropathy WP4856		0.538324	0.393448	TLR4 Signaling and Tolerance WP3851	inflammation	0.812306	0.48133	Glycerolipids and Glycerophospholipids WP4722		0.568188	-0.340286	Development of ureteric collection system WP5053		0.62942	-0.385063
218	Mitochondrial CIV Assembly WP4922	oxidative stress	0.544563	0.35523	Endometrial cancer WP4155	Keywords: cancer, carcinoma, tumor	0.812306	0.430691	Genes controlling nephrogenesis WP4823		0.568188	0.415454	PDGF Pathway WP2526	angiogenesis	0.632442	-0.326604
219	Hereditary leiomyomatosis and renal cell carcinoma pathway WP4206	Keywords: cancer, carcinoma, tumor	0.544563	0.401578	Epithelial to mesenchymal transition in colorectal cancer WP4239	cell proliferation/cell fate and differentiation	0.812306	0.412182	Mitochondrial CIV Assembly WP4922	oxidative stress	0.581396	0.359996	STING pathway in Kawasaki-like disease and COVID-19 WP4961		0.637132	-0.387185
220	Eukaryotic Transcription Initiation WP405	cell proliferation/cell fate and differentiation	0.547688	0.343472	DNA damage response WP707	genomic instability	0.812306	0.431029	Signaling of Hepatocyte Growth Factor Receptor WP313	RTK/RAS/MAPK pathway	0.588242	0.356102	Simplified Interaction Map Between LOXL4 and Oxidative Stress Pathway WP3670	oxidative stress	0.637132	-0.400639
221	TCA Cycle (aka Krebs or citric acid cycle) WP78	cell metabolism	0.547688	0.39986	miRNA regulation of DNA damage response WP1530	genomic instability	0.812306	0.428694	Kit receptor signaling pathway WP304	RTK/RAS/MAPK pathway	0.588242	0.33449	Photodynamic therapy-induced unfolded protein response WP3613		0.637231	0.365066
222	Endoderm differentiation WP2853		0.547688	0.293432	Melatonin metabolism and effects WP3298		0.812306	0.463889	EPO Receptor Signaling WP581		0.588242	0.385112	Chromosomal and microsatellite instability in colorectal cancer WP4216	genomic instability	0.637231	-0.284493
223	DNA damage response WP707	genomic instability	0.547688	0.323394	PDGFR-beta pathway WP3972	angiogenesis	0.812306	0.462691	IL-6 signaling pathway WP364	inflammation	0.588242	0.34728	ncRNAs involved in Wnt signaling in hepatocellular carcinoma WP4336	WNT pathway	0.637231	-0.300155
224	Copper homeostasis WP3286		0.547688	0.332706	Hypothesized Pathways in Pathogenesis of Cardiovascular Disease WP3668		0.812306	0.494177	NRF2 pathway WP2884	oxidative stress	0.588242	0.299796	Ovarian infertility WP34		0.638532	-0.397253
225	IL-6 signaling pathway WP364	inflammation	0.547688	0.344042	Nuclear Receptors Meta-Pathway WP2882		0.812306	0.397998	STING pathway in Kawasaki-like disease and COVID-19 WP4961		0.588242	0.407035	Host-pathogen interaction of human coronaviruses - apoptosis WP4864	cell survival	0.638532	0.404586
226	One-carbon metabolism and related pathways WP3940	cell metabolism	0.547688	0.350111	LncRNA involvement in canonical Wnt signaling and colorectal cancer WP4258	WNT pathway	0.812306	0.425381	MAPK Cascade WP422	RTK/RAS/MAPK pathway	0.588242	0.360799	Regulation of Microtubule Cytoskeleton WP2038	cell polarity and migration	0.638532	-0.320265
227	STING pathway in Kawasaki-like disease and COVID-19 WP4961		0.548893	0.402576	Kisspeptin/kisspeptin receptor system in the ovary WP4871		0.812306	0.468678	Estrogen signaling pathway WP712		0.588242	0.396402	Apoptosis WP254	cell survival	0.638874	0.288442
228	TYROBP causal network in microglia WP3945		0.551932	0.348627	Canonical and non-canonical Notch signaling WP3845	NOTCH pathway	0.812306	0.487707	SARS-CoV-2 mitochondrial interactions WP5038		0.588242	0.383075	Copper homeostasis WP3286		0.643011	-0.305918
229	MECP2 and Associated Rett Syndrome WP3584		0.551932	0.329192	Interleukin-11 Signaling Pathway WP2332	inflammation	0.812306	0.438262	B Cell Receptor Signaling Pathway WP23	inflammation	0.588242	0.302936	Cardiac Progenitor Differentiation WP2406		0.643011	0.408438
230	Kit receptor signaling pathway WP304	RTK/RAS/MAPK pathway	0.551932	0.328849	Insulin Signaling WP481		0.812306	0.400047	T-cell receptor (TCR) signaling pathway WP69	inflammation	0.588242	0.31706	Type I interferon induction and signaling during SARS-CoV-2 infection WP4868	inflammation	0.644091	0.359536
231	B Cell Receptor Signaling Pathway WP23	inflammation	0.551932	0.299945	Circadian rhythm related genes WP3594		0.812306	0.40138	miRNA regulation of DNA damage response WP1530	genomic instability	0.593887	0.321044	Kisspeptin/kisspeptin receptor system in the ovary WP4871		0.656416	-0.35262
232	Canonical and non-canonical Notch signaling WP3845	NOTCH pathway	0.551932	0.405596	Apoptosis Modulation by HSP70 WP384	cell survival	0.812306	0.474876	miRNA regulation of prostate cancer signaling pathways WP3981	Keywords: cancer, carcinoma, tumor	0.594812	0.360675	Photodynamic therapy-induced NFE2L2 (NRF2) survival signaling WP3612	oxidative stress	0.656416	0.384582
233	Nucleotide-binding Oligomerization Domain (NOD) pathway WP1433		0.551932	0.368441	Cardiac Hypertrophic Response WP2795		0.812306	0.430865	Host-pathogen interaction of human coronaviruses - apoptosis WP4864	cell survival	0.599046	0.408057	DNA damage response WP707	genomic instability	0.656416	0.302722
234	4-hydroxytamoxifen, Dexamethasone, and Retinoic Acids Regulation of p27 Expression WP3879	RTK/RAS/MAPK pathway	0.551932	0.405243	1q21.1 copy number variation syndrome WP4905		0.812306	0.472864	Initiation of transcription and translation elongation at the HIV-1 LTR WP3414		0.610641	0.357184	Focal Adhesion-PI3K-Akt-mTOR-signaling pathway WP3932	PI3K pathway	0.660998	0.246802
235	Vitamin D in inflammatory diseases WP4482	inflammation	0.554062	0.392009	Nucleotide Excision Repair WP4753	genomic instability	0.812306	0.432503	Circadian rhythm related genes WP3594		0.610641	0.279387	Hippo-Merlin Signaling Dysregulation WP4541	HIPPO pathway	0.666498	0.290563
236	Wnt/beta-catenin signaling pathway in leukemia WP3658	WNT pathway	0.554062	0.392009	PI3K/AKT/mTOR - VitD3 signaling WP4141	PI3K pathway	0.812306	0.484946	Cardiac Progenitor Differentiation WP2406		0.610641	0.410085	TLR4 Signaling and Tolerance WP3851	inflammation	0.666498	0.369538
237	ncRNAs involved in Wnt signaling in hepatocellular carcinoma WP4336	WNT pathway	0.554431	0.319792	Amino Acid metabolism WP3925	cell metabolism	0.812306	0.416386	Heart Development WP1591		0.610641	0.371485	p53 transcriptional gene network WP4963	p53 pathway	0.670467	0.299619
238	DNA Mismatch Repair WP531	genomic instability	0.555616	0.381535	SARS coronavirus and innate immunity WP4912		0.812306	0.479489	Proximal tubule transport WP4917		0.610641	-0.298928	Resistin as a regulator of inflammation WP4481	inflammation	0.673325	-0.364378
239	7-oxo-C and 7beta-HC pathways WP5064		0.555616	-0.305943	EPO Receptor Signaling WP581		0.812306	0.459539	Wnt Signaling Pathway WP363	WNT pathway	0.614715	0.330118	PI3K-Akt signaling pathway WP4172	PI3K pathway	0.673325	0.243907
240	LncRNA involvement in canonical Wnt signaling and colorectal cancer WP4258	WNT pathway	0.556025	0.313334	Vitamin A and carotenoid metabolism WP716		0.812306	-0.331875	Inhibition of exosome biogenesis and secretion by Manumycin A in CRPC cells WP4301		0.616129	0.395782	Neural Crest Cell Migration in Cancer WP4565		0.673325	0.357639
241	Fibrin Complement Receptor 3 Signaling Pathway WP4136		0.556025	0.364761	Serotonin Receptor 2 and ELK-SRF/GATA4 signaling WP732		0.812306	0.478251	Cardiac Hypertrophic Response WP2795		0.62037	0.328626	Genes controlling nephrogenesis WP4823		0.67909	0.381397
242	Angiogenesis WP1539	angiogenesis	0.560538	0.399902	Sphingolipid pathway WP1422		0.815048	0.457366	AGE/RAGE pathway WP2324	cell proliferation/cell fate and differentiation	0.621236	0.311008	Interferon type I signaling pathways WP585	inflammation	0.685429	-0.29168
243	Glycerolipids and Glycerophospholipids WP4722		0.561134	-0.303779	Interactome of polycomb repressive complex 2 (PRC2) WP2916		0.815048	0.478888	Fatty acid beta-oxidation WP143	cell metabolism	0.621752	-0.283718	miRNAs involvement in the immune response in sepsis WP4329		0.68577	0.339465
244	Factors and pathways affecting insulin-like growth factor (IGF1)-Akt signaling WP3850	RTK/RAS/MAPK pathway	0.561549	0.348448	TCA Cycle and Deficiency of Pyruvate Dehydrogenase complex (PDHc) WP2453	cell metabolism	0.815048	0.478789	Interactome of polycomb repressive complex 2 (PRC2) WP2916		0.629483	0.402637	SARS coronavirus and innate immunity WP4912		0.68577	0.384115
245	Breast cancer pathway WP4262	Keywords: cancer, carcinoma, tumor	0.563869	0.287179	Wnt signaling pathway and pluripotency WP399	WNT pathway	0.815048	0.410276	G Protein Signaling Pathways WP35		0.629483	0.307441	ErbB signaling pathway WP673	RTK/RAS/MAPK pathway	0.704829	-0.264078
246	Sterol regulatory element-binding proteins (SREBP) signaling WP1982	cell metabolism	0.563869	-0.224863	DNA Mismatch Repair WP531	genomic instability	0.815048	0.460538	Canonical and non-canonical Notch signaling WP3845	NOTCH pathway	0.629483	0.395645	Methionine De Novo and Salvage Pathway WP3580		0.708189	0.37253
247	Physiological and pathological hypertrophy of the heart WP1528		0.571361	0.37001	Parkinson's disease pathway WP2371		0.831611	0.447915	Eicosanoid metabolism via lipooxygenases (LOX) WP4721	cell metabolism	0.637428	0.393527	Thymic Stromal LymphoPoietin (TSLP) Signaling Pathway WP2203		0.711009	-0.307109
248	Endometrial cancer WP4155	Keywords: cancer, carcinoma, tumor	0.571361	0.309904	Glycerolipids and Glycerophospholipids WP4722		0.831611	-0.329885	TCA Cycle and Deficiency of Pyruvate Dehydrogenase complex (PDHc) WP2453	cell metabolism	0.637428	0.399253	Apoptosis Modulation by HSP70 WP384	cell survival	0.755333	0.35616
249	3q29 copy number variation syndrome WP4906		0.571361	-0.238706	B Cell Receptor Signaling Pathway WP23	inflammation	0.8386	0.400422	LncRNA involvement in canonical Wnt signaling and colorectal cancer WP4258	WNT pathway	0.637428	0.306966	Sphingolipid Metabolism (general overview) WP4725		0.755333	-0.340368
250	PI3K-AKT-mTOR signaling pathway and therapeutic opportunities WP3844	PI3K pathway	0.571361	0.352144	One-carbon metabolism WP241	cell metabolism	0.8386	0.442904	PDGFR-beta pathway WP3972	angiogenesis	0.637428	0.354225	The influence of laminopathies on Wnt signaling WP4844	WNT pathway	0.755347	0.319897
251	DNA Repair Pathways Full Network WP4946	genomic instability	0.571361	0.284914	Mammary gland development pathway - Pregnancy and lactation (Stage 3 of 4) WP2817		0.8386	0.45261	Physiological and pathological hypertrophy of the heart WP1528		0.641859	0.367205	Proteoglycan biosynthesis WP4784		0.755347	0.370734
252	Resistin as a regulator of inflammation WP4481	inflammation	0.571361	0.381817	Prion disease pathway WP3995		0.8386	0.433492	DNA damage response WP707	genomic instability	0.659003	0.307275	mBDNF and proBDNF regulation of GABA neurotransmission WP4829		0.755347	-0.351472
253	Thyroid stimulating hormone (TSH) signaling pathway WP2032		0.573002	0.310281	16p11.2 distal deletion syndrome WP4950		0.8386	0.448697	1q21.1 copy number variation syndrome WP4905		0.670946	0.373776	ATM Signaling Network in Development and Disease WP3878	genomic instability	0.755347	0.302044
254	Aryl Hydrocarbon Receptor Netpath WP2586	RTK/RAS/MAPK pathway	0.573002	0.329704	3q29 copy number variation syndrome WP4906		0.8386	-0.283153	Glutathione metabolism WP100		0.678299	0.388135	Sphingolipid Metabolism (integrated pathway) WP4726		0.774234	-0.330061
255	Heart Development WP1591		0.573002	0.359431	BDNF-TrkB Signaling WP3676		0.8386	0.435346	Hippo-Yap signaling pathway WP4537	HIPPO pathway	0.695408	0.363571	Small cell lung cancer WP4658	Keywords: cancer, carcinoma, tumor	0.774234	-0.256528
256	Nanomaterial induced apoptosis WP2507	cell survival	0.573002	0.390864	Synaptic signaling pathways associated with autism spectrum disorder WP4539		0.8386	0.423703	Wnt signaling pathway and pluripotency WP399	WNT pathway	0.703656	0.288301	Wnt Signaling Pathway WP363	WNT pathway	0.777958	-0.282393
257	NAD+ biosynthetic pathways WP3645		0.574913	0.389995	Estrogen signaling pathway WP712		0.8386	0.446482	IL-7 signaling pathway WP205	inflammation	0.703656	0.36521	Hair Follicle Development: Organogenesis - Part 2 of 3 WP2839		0.780292	-0.343479
258	Photodynamic therapy-induced NFE2L2 (NRF2) survival signaling WP3612	oxidative stress	0.576945	0.378024	Endoderm differentiation WP2853		0.8386	0.390077	22q11.2 copy number variation syndrome WP4657		0.703656	0.28818	Inhibition of exosome biogenesis and secretion by Manumycin A in CRPC cells WP4301		0.780292	-0.338467
259	Sudden Infant Death Syndrome (SIDS) Susceptibility Pathways WP706		0.576945	0.289878	Adipogenesis WP236		0.8386	0.390542	Angiopoietin Like Protein 8 Regulatory Pathway WP3915		0.708809	0.268932	Type 2 papillary renal cell carcinoma WP4241	Keywords: cancer, carcinoma, tumor	0.780292	0.313523
260	AGE/RAGE pathway WP2324	cell proliferation/cell fate and differentiation	0.576945	0.30389	Neural Crest Differentiation WP2064		0.8386	0.405909	Endothelin Pathways WP2197		0.714325	-0.29364	Ferroptosis WP4313	cell survival	0.780292	-0.289844
261	PDGFR-beta pathway WP3972	angiogenesis	0.576945	0.349604	Development of ureteric collection system WP5053		0.8386	0.443398	Thyroid stimulating hormone (TSH) signaling pathway WP2032		0.714325	0.294374	Sphingolipid pathway WP1422		0.780292	-0.317243
262	Interferon type I signaling pathways WP585	inflammation	0.58022	0.312001	ncRNAs involved in Wnt signaling in hepatocellular carcinoma WP4336	WNT pathway	0.8386	0.401907	Endometrial cancer WP4155	Keywords: cancer, carcinoma, tumor	0.714325	0.292197	Neural Crest Differentiation WP2064		0.780292	-0.275868
263	NRF2-ARE regulation WP4357	oxidative stress	0.590066	0.360372	PPAR-alpha pathway WP2878	cell proliferation/cell fate and differentiation	0.8386	0.453928	Oxidative Stress WP408	oxidative stress	0.714325	0.337142	Cell migration and invasion through p75NTR WP4561	cell polarity and migration	0.780301	0.3527
264	NO/cGMP/PKG mediated Neuroprotection WP4008		0.600605	0.381432	Wnt/beta-catenin signaling pathway in leukemia WP3658	WNT pathway	0.8386	0.442526	BDNF-TrkB Signaling WP3676		0.714325	0.333887	Arrhythmogenic Right Ventricular Cardiomyopathy WP2118		0.780301	0.297379
265	TCA Cycle and Deficiency of Pyruvate Dehydrogenase complex (PDHc) WP2453	cell metabolism	0.600605	0.387132	AGE/RAGE pathway WP2324	cell proliferation/cell fate and differentiation	0.8386	0.39727	Factors and pathways affecting insulin-like growth factor (IGF1)-Akt signaling WP3850	RTK/RAS/MAPK pathway	0.714325	0.324132	IL-6 signaling pathway WP364	inflammation	0.780301	-0.286127
266	Vitamin A and carotenoid metabolism WP716		0.625046	-0.276912	Glycogen Synthesis and Degradation WP500	cell metabolism	0.8386	0.413229	Complement system WP2806		0.714976	0.29715	Apoptosis Modulation and Signaling WP1772	cell survival	0.78268	0.258274
267	Mitochondrial LC-Fatty Acid Beta-Oxidation WP368	cell metabolism	0.642637	-0.286225	IL-3 signaling pathway WP286		0.8386	0.410906	mBDNF and proBDNF regulation of GABA neurotransmission WP4829		0.72929	0.364479	Energy Metabolism WP1541	cell metabolism	0.784708	-0.280109
268	Microglia Pathogen Phagocytosis Pathway WP3937		0.64983	0.331416	Trans-sulfuration and one-carbon metabolism WP2525	cell metabolism	0.8386	0.42753	Adipogenesis WP236		0.733706	0.26975	Toll-like Receptor Signaling related to MyD88 WP3858	inflammation	0.785685	0.322793
269	Glycogen Synthesis and Degradation WP500	cell metabolism	0.649882	0.319355	MTHFR deficiency WP4288		0.8386	0.438645	Simplified Interaction Map Between LOXL4 and Oxidative Stress Pathway WP3670	oxidative stress	0.742171	-0.298693	MTHFR deficiency WP4288		0.785685	0.338391
270	Regulation of apoptosis by parathyroid hormone-related protein WP3872	cell survival	0.652147	0.35695	NAD+ biosynthetic pathways WP3645		0.8386	0.445381	Prion disease pathway WP3995		0.744326	0.320429	Vitamin D-sensitive calcium signaling in depression WP4698		0.787759	-0.319211
271	Glycosylation and related congenital defects WP4521		0.652147	0.337595	Fluoropyrimidine Activity WP1601		0.8386	0.426735	Fatty Acid Biosynthesis WP357		0.744326	-0.276415	Common Pathways Underlying Drug Addiction WP2636		0.796023	-0.312736
272	ATM Signaling Network in Development and Disease WP3878	genomic instability	0.652147	0.309406	G Protein Signaling Pathways WP35		0.8386	0.39382	Nuclear receptors WP170		0.749065	0.326433	PPAR-alpha pathway WP2878	cell proliferation/cell fate and differentiation	0.805339	-0.335806
273	Angiopoietin Like Protein 8 Regulatory Pathway WP3915		0.652147	0.266952	SARS-CoV-2 innate immunity evasion and cell-specific immune response WP5039		0.8386	0.399	DNA Mismatch Repair WP531	genomic instability	0.757936	0.337576	Oxysterols derived from cholesterol WP4545		0.807095	-0.313244
274	Serotonin Receptor 4/6/7 and NR3C Signaling WP734		0.655929	0.365413	Vitamin D in inflammatory diseases WP4482	inflammation	0.8386	0.436749	Resistin as a regulator of inflammation WP4481	inflammation	0.757936	0.343505	Aryl Hydrocarbon Receptor Pathway WP2873	RTK/RAS/MAPK pathway	0.807095	0.307156
275	Notch Signaling Pathway Netpath WP61	NOTCH pathway	0.658811	0.296003	Signal transduction through IL1R WP4496	inflammation	0.8386	0.42658	Glycosylation and related congenital defects WP4521		0.757936	0.325193	Hippo-Yap signaling pathway WP4537	HIPPO pathway	0.811454	-0.314674
276	Eicosanoid metabolism via lipooxygenases (LOX) WP4721	cell metabolism	0.662318	0.362953	Regucalcin in proximal tubule epithelial kidney cells WP4838		0.8386	0.426568	Synaptic signaling pathways associated with autism spectrum disorder WP4539		0.757936	0.308057	SARS-CoV-2 mitochondrial interactions WP5038		0.811454	0.31396
277	Oxidative Damage WP3941	oxidative stress	0.662318	0.312515	Alzheimer's disease WP2059		0.8386	0.390941	DNA Repair Pathways Full Network WP4946	genomic instability	0.757936	0.26109	Mammary gland development pathway - Pregnancy and lactation (Stage 3 of 4) WP2817		0.834961	-0.309466
278	T-cell receptor (TCR) signaling pathway WP69	inflammation	0.672194	0.283571	Heart Development WP1591		0.8386	0.422615	Wnt/beta-catenin signaling pathway in leukemia WP3658	WNT pathway	0.757936	0.339883	Pathogenic Escherichia coli infection WP2272		0.836937	0.270423
279	Striated Muscle Contraction Pathway WP383		0.718032	0.354469	Hematopoietic Stem Cell Gene Regulation by GABP alpha/beta Complex WP3657		0.8386	0.436969	TLR4 Signaling and Tolerance WP3851	inflammation	0.757936	0.332336	Amyotrophic lateral sclerosis (ALS) WP2447		0.836948	-0.285683
280	IL-7 signaling pathway WP205	inflammation	0.718032	0.339173	Vitamin B12 metabolism WP1533		0.8386	-0.295178	Parkinson's disease pathway WP2371		0.757936	0.321973	ATM Signaling Pathway WP2516	genomic instability	0.836948	0.296284
281	Phosphoinositides metabolism WP4971		0.718032	-0.231143	IL-4 signaling pathway WP395	inflammation	0.8386	0.396721	MicroRNAs in cardiomyocyte hypertrophy WP1544		0.757936	0.272964	Extracellular vesicle-mediated signaling in recipient cells WP2870		0.842204	0.299299
282	TLR4 Signaling and Tolerance WP3851	inflammation	0.718032	0.330409	Wnt signaling WP428	WNT pathway	0.8386	0.385461	Striated Muscle Contraction Pathway WP383		0.757936	0.353709	Autophagy WP4923	cell survival	0.842204	0.289565
283	Thyroid hormones production and their peripheral downstream signaling effects WP4746		0.718032	0.277633	T-cell receptor (TCR) signaling pathway WP69	inflammation	0.838756	0.387584	ESC Pluripotency Pathways WP3931	cell proliferation/cell fate and differentiation	0.757936	0.271534	Prader-Willi and Angelman Syndrome WP3998		0.842204	0.295824
284	Endothelin Pathways WP2197		0.73648	0.333343	Glycosylation and related congenital defects WP4521		0.838756	0.418471	Mammary gland development pathway - Pregnancy and lactation (Stage 3 of 4) WP2817		0.757936	-0.271706	Synaptic Vesicle Pathway WP2267		0.842204	-0.294313
285	Initiation of transcription and translation elongation at the HIV-1 LTR WP3414		0.73648	0.303532	Thyroid hormones production and their peripheral downstream signaling effects WP4746		0.840083	0.387876	Aryl Hydrocarbon Receptor Netpath WP2586	RTK/RAS/MAPK pathway	0.757936	0.296236	EPO Receptor Signaling WP581		0.843147	0.302602
286	MicroRNAs in cardiomyocyte hypertrophy WP1544		0.73648	0.268417	Ciliary landscape WP4352	cell polarity and migration	0.849844	0.374803	NO/cGMP/PKG mediated Neuroprotection WP4008		0.758993	0.34651	TNF-alpha signaling pathway WP231	inflammation	0.843147	-0.235879
287	Photodynamic therapy-induced unfolded protein response WP3613		0.73648	0.311413	Non-genomic actions of 1,25 dihydroxyvitamin D3 WP4341	cell proliferation/cell fate and differentiation	0.851325	0.388032	ATM Signaling Network in Development and Disease WP3878	genomic instability	0.764728	0.292231	Mechanoregulation and pathology of YAP/TAZ via Hippo and non-Hippo mechanisms WP4534	HIPPO pathway	0.84774	0.273268
288	Nuclear receptors WP170		0.73648	0.310971	Proximal tubule transport WP4917		0.851325	0.41093	ATM Signaling Pathway WP2516	genomic instability	0.783606	0.305619	Synaptic signaling pathways associated with autism spectrum disorder WP4539		0.84774	-0.274141
289	Alzheimer's disease WP2059		0.73648	0.27072	DNA Repair Pathways Full Network WP4946	genomic instability	0.851325	0.375328	Photodynamic therapy-induced unfolded protein response WP3613		0.783606	0.310445	Pancreatic adenocarcinoma pathway WP4263	Keywords: cancer, carcinoma, tumor	0.850746	0.242002
290	mBDNF and proBDNF regulation of GABA neurotransmission WP4829		0.73648	0.339449	Physiological and pathological hypertrophy of the heart WP1528		0.851325	0.413087	Angiogenesis WP1539	angiogenesis	0.787161	0.335857	Envelope proteins and their potential roles in EDMD physiopathology WP4535		0.850746	-0.264333
291	Glutathione metabolism WP100		0.73648	0.343487	PI3K-AKT-mTOR signaling pathway and therapeutic opportunities WP3844	PI3K pathway	0.855629	0.40194	7-oxo-C and 7beta-HC pathways WP5064		0.787161	-0.270838	nsp1 from SARS-CoV-2 inhibits translation initiation in the host cell WP5027		0.856446	0.322444
292	Hippo-Yap signaling pathway WP4537	HIPPO pathway	0.747873	0.322933	Proteoglycan biosynthesis WP4784		0.857536	0.426423	Neurodegeneration with brain iron accumulation (NBIA) subtypes pathway WP4577		0.787161	0.278473	Melanoma WP4685		0.858849	-0.245241
293	IL-4 signaling pathway WP395	inflammation	0.761069	0.275613	mBDNF and proBDNF regulation of GABA neurotransmission WP4829		0.857726	0.420613	Association Between Physico-Chemical Features and Toxicity Associated Pathways WP3680		0.787161	0.273708	Ciliary landscape WP4352	cell polarity and migration	0.860912	0.217539
294	Neurodegeneration with brain iron accumulation (NBIA) subtypes pathway WP4577		0.761704	0.275095	Transcription co-factors SKI and SKIL protein partners WP4533		0.857726	0.42391	IL-4 signaling pathway WP395	inflammation	0.787595	0.277891	Renin-angiotensin-aldosterone system (RAAS) WP4756		0.864611	0.293001
295	BDNF-TrkB Signaling WP3676		0.782272	0.295897	ATM Signaling Network in Development and Disease WP3878	genomic instability	0.857726	0.386268	Exercise-induced Circadian Regulation WP410		0.793972	0.279786	22q11.2 copy number variation syndrome WP4657		0.869497	0.244185
296	Glucocorticoid Receptor Pathway WP2880		0.784732	0.264301	T-Cell Receptor and Co-stimulatory Signaling WP2583	inflammation	0.857726	0.407669	Oxysterols derived from cholesterol WP4545		0.798433	-0.256711	7-oxo-C and 7beta-HC pathways WP5064		0.872817	-0.297436
297	MTHFR deficiency WP4288		0.789792	0.31332	Resistin as a regulator of inflammation WP4481	inflammation	0.864698	0.408876	miRNAs involvement in the immune response in sepsis WP4329		0.806238	0.296305	Cytosolic DNA-sensing pathway WP4655	genomic instability	0.876431	0.253609
298	Development of ureteric collection system WP5053		0.789792	0.313138	Pathways affected in adenoid cystic carcinoma WP3651	Keywords: cancer, carcinoma, tumor	0.864698	0.373607	Energy Metabolism WP1541	cell metabolism	0.810703	0.27598	Thermogenesis WP4321		0.876904	-0.232017
299	IL17 signaling pathway WP2112	inflammation	0.792062	0.299346	Factors and pathways affecting insulin-like growth factor (IGF1)-Akt signaling WP3850	RTK/RAS/MAPK pathway	0.864698	0.387272	Wnt signaling WP428	WNT pathway	0.812984	0.255173	DNA damage response (only ATM dependent) WP710	genomic instability	0.877112	0.232514
300	Splicing factor NOVA regulated synaptic proteins WP4148		0.804748	0.292461	Ectoderm Differentiation WP2858		0.864698	0.365976	Photodynamic therapy-induced NFE2L2 (NRF2) survival signaling WP3612	oxidative stress	0.819455	0.313237	Endoplasmic reticulum stress response in coronavirus infection WP4861	cell survival	0.877146	0.262071
301	Wnt signaling in kidney disease WP4150	WNT pathway	0.804748	0.311585	Folate Metabolism WP176	cell metabolism	0.864698	0.37759	Sphingolipid pathway WP1422		0.819455	0.300918	Notch Signaling WP268	NOTCH pathway	0.882732	0.261277
302	Ebstein-Barr virus LMP1 signaling WP262		0.804748	0.303984	MicroRNAs in cardiomyocyte hypertrophy WP1544		0.864698	0.368511	Hematopoietic Stem Cell Differentiation WP2849		0.819455	-0.248602	Wnt signaling in kidney disease WP4150	WNT pathway	0.882732	-0.290675
303	Ovarian infertility WP34		0.806213	0.319078	TYROBP causal network in microglia WP3945		0.864698	0.381898	PI3K-AKT-mTOR signaling pathway and therapeutic opportunities WP3844	PI3K pathway	0.822277	0.289138	Hepatitis C and Hepatocellular Carcinoma WP3646	Keywords: cancer, carcinoma, tumor	0.882732	0.259484
304	Target Of Rapamycin (TOR) Signaling WP1471	PI3K pathway	0.807935	0.275178	Ethanol effects on histone modifications WP3996		0.86489	-0.279928	Nucleotide Excision Repair WP4753	genomic instability	0.822277	0.270827	Breast cancer pathway WP4262	Keywords: cancer, carcinoma, tumor	0.889962	-0.22273
305	Osteoblast differentiation WP4787		0.813797	0.250972	Regulation of toll-like receptor signaling pathway WP1449	inflammation	0.86723	0.361308	Splicing factor NOVA regulated synaptic proteins WP4148		0.825321	0.294302	Pathways affected in adenoid cystic carcinoma WP3651	Keywords: cancer, carcinoma, tumor	0.89594	-0.238476
306	miRNAs involvement in the immune response in sepsis WP4329		0.813797	0.281261	AMP-activated protein kinase (AMPK) signaling WP1403	cell proliferation/cell fate and differentiation	0.86723	0.370807	Hair Follicle Development: Organogenesis - Part 2 of 3 WP2839		0.825321	0.317158	RAC1/PAK1/p38/MMP2 Pathway WP3303	RTK/RAS/MAPK pathway	0.897475	0.243418
307	Oxidative Stress WP408	oxidative stress	0.819275	0.283434	IL-2 signaling pathway WP49	inflammation	0.86723	0.37395	IL-3 signaling pathway WP286		0.831054	0.273672	G13 Signaling Pathway WP524		0.897979	0.26132
308	Prion disease pathway WP3995		0.828778	0.274831	Vitamin D-sensitive calcium signaling in depression WP4698		0.86723	0.390144	Hedgehog Signaling Pathway WP4249	cell proliferation/cell fate and differentiation	0.844644	-0.242958	Zinc homeostasis WP3529		0.910184	0.276283
309	Ethanol effects on histone modifications WP3996		0.828778	0.280076	Photodynamic therapy-induced NFE2L2 (NRF2) survival signaling WP3612	oxidative stress	0.86723	0.394329	NAD+ biosynthetic pathways WP3645		0.844644	0.309349	Integrated breast cancer pathway WP1984	Keywords: cancer, carcinoma, tumor	0.910184	-0.211853
310	ATM Signaling Pathway WP2516	genomic instability	0.839808	0.273174	Hematopoietic Stem Cell Differentiation WP2849		0.86723	0.386995	Glycogen Synthesis and Degradation WP500	cell metabolism	0.844644	0.271493	Neovascularisation processes WP4331	angiogenesis	0.910184	-0.258138
311	Autophagy WP4923	cell survival	0.841028	0.268831	ATM Signaling Pathway WP2516	genomic instability	0.86723	0.379154	Phosphoinositides metabolism WP4971		0.844644	-0.222446	Nanoparticle triggered autophagic cell death WP2509	cell survival	0.911752	0.275934
312	Sphingolipid pathway WP1422		0.844478	0.27957	NRF2-ARE regulation WP4357	oxidative stress	0.86723	0.38541	Development of ureteric collection system WP5053		0.844644	0.299288	PI3K/AKT/mTOR - VitD3 signaling WP4141	PI3K pathway	0.911752	-0.283768
313	Association Between Physico-Chemical Features and Toxicity Associated Pathways WP3680		0.852895	0.245824	Hedgehog Signaling Pathway WP4249	cell proliferation/cell fate and differentiation	0.86723	0.386722	Autophagy WP4923	cell survival	0.864645	0.27011	LncRNA involvement in canonical Wnt signaling and colorectal cancer WP4258	WNT pathway	0.913089	0.235054
314	1q21.1 copy number variation syndrome WP4905		0.852895	0.286965	MAPK Cascade WP422	RTK/RAS/MAPK pathway	0.86723	0.373668	Vitamin D-sensitive calcium signaling in depression WP4698		0.876869	0.283407	SARS-CoV-2 innate immunity evasion and cell-specific immune response WP5039		0.913089	0.239154
315	Exercise-induced Circadian Regulation WP410		0.852895	0.250541	Male infertility WP4673		0.871617	0.356648	T-Cell Receptor and Co-stimulatory Signaling WP2583	inflammation	0.88388	0.280164	Unfolded protein response WP4925	cell proliferation/cell fate and differentiation	0.913089	-0.259347
316	Nucleotide Excision Repair WP4753	genomic instability	0.86254	0.248596	Lung fibrosis WP3624		0.871617	0.366042	MTHFR deficiency WP4288		0.88388	0.285374	Ethanol effects on histone modifications WP3996		0.913089	-0.256127
317	Hematopoietic Stem Cell Differentiation WP2849		0.86254	0.273123	Nuclear receptors WP170		0.871617	0.37541	Ferroptosis WP4313	cell survival	0.897974	0.25117	p38 MAPK Signaling Pathway WP400	RTK/RAS/MAPK pathway	0.913089	-0.24447
318	Male infertility WP4673		0.86254	0.233655	Neurodegeneration with brain iron accumulation (NBIA) subtypes pathway WP4577		0.871617	0.36043	AMP-activated protein kinase (AMPK) signaling WP1403	cell proliferation/cell fate and differentiation	0.901745	0.244681	Parkinson's disease pathway WP2371		0.921245	-0.255364
319	G Protein Signaling Pathways WP35		0.866307	0.235741	T-Cell antigen Receptor (TCR) pathway during Staphylococcus aureus infection WP3863		0.871617	0.359935	Thyroid hormones production and their peripheral downstream signaling effects WP4746		0.904617	0.234822	Novel intracellular components of RIG-I-like receptor (RLR) pathway WP3865		0.923177	0.234983
320	ESC Pluripotency Pathways WP3931	cell proliferation/cell fate and differentiation	0.870305	0.231842	Nanoparticle triggered autophagic cell death WP2509	cell survival	0.872981	0.378271	Alzheimer's disease WP2059		0.904617	0.23365	Alpha 6 Beta 4 signaling pathway WP244	cell polarity and migration	0.923359	-0.242724
321	Nanoparticle triggered autophagic cell death WP2509	cell survival	0.870305	0.271661	Ebstein-Barr virus LMP1 signaling WP262		0.884806	0.374173	Target Of Rapamycin (TOR) Signaling WP1471	PI3K pathway	0.90596	0.249924	Lipid Metabolism Pathway WP3965	cell metabolism	0.923359	-0.262606
322	Hedgehog Signaling Pathway WP4249	cell proliferation/cell fate and differentiation	0.871437	0.270581	Regulatory circuits of the STAT3 signaling pathway WP4538	RTK/RAS/MAPK pathway	0.89084	0.350157	ncRNAs involved in Wnt signaling in hepatocellular carcinoma WP4336	WNT pathway	0.931421	0.229299	Ebstein-Barr virus LMP1 signaling WP262		0.923359	0.266805
323	PI3K/AKT/mTOR - VitD3 signaling WP4141	PI3K pathway	0.889257	0.280967	DNA IR-damage and cellular response via ATR WP4016	genomic instability	0.892552	0.345939	Wnt signaling in kidney disease WP4150	WNT pathway	0.931421	0.267309	Nanoparticle-mediated activation of receptor signaling WP2643		0.923359	0.255744
324	22q11.2 copy number variation syndrome WP4657		0.896397	0.224366	Oxysterols derived from cholesterol WP4545		0.899819	-0.265568	IL17 signaling pathway WP2112	inflammation	0.931421	0.25406	Immune response to tuberculosis WP4197		0.926472	0.257995
325	IL-3 signaling pathway WP286		0.901406	0.238885	Genotoxicity pathway WP4286	genomic instability	0.900201	0.344391	Osteoblast differentiation WP4787		0.931421	0.223535	Fragile X Syndrome WP4549		0.937326	0.214987
326	Mammary gland development pathway - Pregnancy and lactation (Stage 3 of 4) WP2817		0.925229	0.252953	Wnt signaling in kidney disease WP4150	WNT pathway	0.906702	0.362602	Glucocorticoid Receptor Pathway WP2880		0.9343	0.224975	TNF related weak inducer of apoptosis (TWEAK) Signaling Pathway WP2036	cell survival	0.94581	-0.226579
327	Synaptic signaling pathways associated with autism spectrum disorder WP4539		0.936428	0.230072	miRNAs involvement in the immune response in sepsis WP4329		0.913857	0.344531	Ethanol effects on histone modifications WP3996		0.939058	0.244978	T-Cell Receptor and Co-stimulatory Signaling WP2583	inflammation	0.956866	-0.243728
328	Fatty Acid Biosynthesis WP357		0.936428	-0.197444	Splicing factor NOVA regulated synaptic proteins WP4148		0.913857	0.34699	Mitochondrial Gene Expression WP391		0.942685	0.26542	Genes related to primary cilium development (based on CRISPR) WP4536	cell polarity and migration	0.958096	-0.207996
329	Genotoxicity pathway WP4286	genomic instability	0.942089	0.217633	Rett syndrome causing genes WP4312		0.913857	0.339595	Ebstein-Barr virus LMP1 signaling WP262		0.948917	0.249986	4-hydroxytamoxifen, Dexamethasone, and Retinoic Acids Regulation of p27 Expression WP3879	RTK/RAS/MAPK pathway	0.961811	0.25568
330	Glycerophospholipid Biosynthetic Pathway WP2533		0.942089	-0.189234	Autophagy WP4923	cell survival	0.918182	0.3374	Rett syndrome causing genes WP4312		0.952104	0.229465	MECP2 and Associated Rett Syndrome WP3584		0.975423	0.216987
331	T-Cell Receptor and Co-stimulatory Signaling WP2583	inflammation	0.942089	0.239274	Endothelin Pathways WP2197		0.924153	0.344841	Androgen receptor signaling pathway WP138		0.952104	0.208325	Prion disease pathway WP3995		0.977705	0.226738
332	T-Cell antigen Receptor (TCR) pathway during Staphylococcus aureus infection WP3863		0.942089	0.215936	Fibrin Complement Receptor 3 Signaling Pathway WP4136		0.926212	0.33435	PI3K/AKT/mTOR - VitD3 signaling WP4141	PI3K pathway	0.952104	0.256433	Male infertility WP4673		0.981405	0.204978
333	Ectoderm Differentiation WP2858		0.957721	0.199749	Angiopoietin Like Protein 8 Regulatory Pathway WP3915		0.926212	0.327641	Ectoderm Differentiation WP2858		0.952104	0.205667	Head and Neck Squamous Cell Carcinoma WP4674	Keywords: cancer, carcinoma, tumor	0.981405	0.204041
334	Sphingolipid Metabolism (general overview) WP4725		0.959475	-0.188786	ESC Pluripotency Pathways WP3931	cell proliferation/cell fate and differentiation	0.93798	0.316358	Hematopoietic Stem Cell Gene Regulation by GABP alpha/beta Complex WP3657		0.952104	0.24674	PI3K-AKT-mTOR signaling pathway and therapeutic opportunities WP3844	PI3K pathway	0.981405	0.222512
335	IL-2 signaling pathway WP49	inflammation	0.964709	0.210188	Simplified Interaction Map Between LOXL4 and Oxidative Stress Pathway WP3670	oxidative stress	0.93798	0.337497	Sphingolipid Metabolism (general overview) WP4725		0.952104	0.241223	Host-pathogen interaction of human coronaviruses - interferon induction WP4880	inflammation	0.982001	0.216571
336	Energy Metabolism WP1541	cell metabolism	0.967167	0.203104	Ovarian infertility WP34		0.948723	0.328914	Genotoxicity pathway WP4286	genomic instability	0.9524	0.215428	Association Between Physico-Chemical Features and Toxicity Associated Pathways WP3680		0.983632	0.20656
337	Androgen receptor signaling pathway WP138		0.967167	0.193144	Energy Metabolism WP1541	cell metabolism	0.948723	0.309557	NRF2-ARE regulation WP4357	oxidative stress	0.955676	0.231745	Host-pathogen interaction of human coronaviruses - autophagy WP4863	cell survival	0.983632	-0.220167
338	Transcription factor regulation in adipogenesis WP3599		0.967167	0.232095	Fatty acid beta-oxidation WP143	cell metabolism	0.960836	0.301426	Host-pathogen interaction of human coronaviruses - autophagy WP4863	cell survival	0.955676	-0.199414	Glycerophospholipid Biosynthetic Pathway WP2533		0.988609	-0.208374
339	AMP-activated protein kinase (AMPK) signaling WP1403	cell proliferation/cell fate and differentiation	0.967167	0.199339	Glucocorticoid Receptor Pathway WP2880		0.960836	0.296106	T-Cell antigen Receptor (TCR) pathway during Staphylococcus aureus infection WP3863		0.955676	0.211336	Hematopoietic Stem Cell Gene Regulation by GABP alpha/beta Complex WP3657		0.988609	-0.214203
340	Hematopoietic Stem Cell Gene Regulation by GABP alpha/beta Complex WP3657		0.967167	0.223372	Histone Modifications WP2369	genomic instability	0.960836	0.294479	Sphingolipid Metabolism (integrated pathway) WP4726		0.955676	0.229551	Translation inhibitors in chronically activated PDGFRA cells WP4566	angiogenesis	0.988609	-0.196557
341	Sphingolipid Metabolism (integrated pathway) WP4726		0.967167	-0.178318	7-oxo-C and 7beta-HC pathways WP5064		0.960836	-0.229062	Histone Modifications WP2369	genomic instability	0.955676	0.21447	AMP-activated protein kinase (AMPK) signaling WP1403	cell proliferation/cell fate and differentiation	0.988609	-0.197737
342	Mitochondrial Gene Expression WP391		0.979408	-0.185575	Cardiac Progenitor Differentiation WP2406		0.960836	0.304491	Male infertility WP4673		0.957228	0.20058	Initiation of transcription and translation elongation at the HIV-1 LTR WP3414		0.995205	-0.196527
343	Ferroptosis WP4313	cell survival	0.984511	0.189418	Mitochondrial Gene Expression WP391		0.960836	0.303524	Ovarian infertility WP34		0.963744	0.233075	Regucalcin in proximal tubule epithelial kidney cells WP4838		0.996078	0.1978
344	Host-pathogen interaction of human coronaviruses - autophagy WP4863	cell survival	0.984511	-0.168632	Fatty Acid Biosynthesis WP357		0.960836	-0.225346	Transcription factor regulation in adipogenesis WP3599		0.963744	0.232818	16p11.2 distal deletion syndrome WP4950		0.996078	-0.192004
345	Rett syndrome causing genes WP4312		0.989825	0.183704	Host-pathogen interaction of human coronaviruses - autophagy WP4863	cell survival	0.977786	-0.212666	Pathways affected in adenoid cystic carcinoma WP3651	Keywords: cancer, carcinoma, tumor	0.968579	0.196213	Follicle Stimulating Hormone (FSH) signaling pathway WP2035		0.996078	-0.18861
346	Histone Modifications WP2369	genomic instability	0.992125	0.178291	Glycerophospholipid Biosynthetic Pathway WP2533		0.977786	0.268352	White fat cell differentiation WP4149		0.971563	-0.176353	Glycogen Synthesis and Degradation WP500	cell metabolism	0.996078	-0.178818
347	Fatty acid beta-oxidation WP143	cell metabolism	0.997675	0.172153	Sphingolipid Metabolism (general overview) WP4725		0.977786	0.269963	Nanoparticle triggered autophagic cell death WP2509	cell survival	0.971563	0.207363	Transcription co-factors SKI and SKIL protein partners WP4533		0.996078	-0.187757
348	CAMKK2 Pathway WP4874	cell proliferation/cell fate and differentiation	0.997675	0.164634	Mitochondrial LC-Fatty Acid Beta-Oxidation WP368	cell metabolism	0.977786	-0.212523	Ciliary landscape WP4352	cell polarity and migration	0.971563	0.183796	Target Of Rapamycin (TOR) Signaling WP1471	PI3K pathway	0.996078	0.175681
349	Vitamin D-sensitive calcium signaling in depression WP4698		0.997675	0.171712	Sphingolipid Metabolism (integrated pathway) WP4726		0.977786	0.266233	CAMKK2 Pathway WP4874	cell proliferation/cell fate and differentiation	0.971563	0.195757	Notch Signaling Pathway Netpath WP61	NOTCH pathway	0.996078	0.17376
350	White fat cell differentiation WP4149		0.99875	0.160451	Osteoblast differentiation WP4787		0.977786	0.263874	IL-2 signaling pathway WP49	inflammation	0.971563	0.192158	Rett syndrome causing genes WP4312		0.996078	-0.171155
351	Lipid Metabolism Pathway WP3965	cell metabolism	0.99875	-0.137748	Transcription factor regulation in adipogenesis WP3599		0.984898	0.251851	Lipid Metabolism Pathway WP3965	cell metabolism	0.972519	-0.177258	Nonalcoholic fatty liver disease WP4396		0.997648	0.165068
352	Pathways affected in adenoid cystic carcinoma WP3651	Keywords: cancer, carcinoma, tumor	0.99875	0.132049	Lipid Metabolism Pathway WP3965	cell metabolism	0.997272	0.202663	Glycerophospholipid Biosynthetic Pathway WP2533		0.990081	0.171073	Joubert Syndrome WP4656		0.997648	-0.152194
